# Supplementary material
Source: publisher figshare collection journal article supplement (https://acs.figshare.com/ndownloader/files/9281500)
Supplement: Supplementary file 1 [file 9281500]

## Sheet:  Table S3 (Nuclear)
N: R Count	N: K Count	N: Length	N: Mass	N: PEP	N: Score	N: Intensity	N: MS/MS Count	T: Sequence	T: Proteins	T: Leading razor protein	T: Gene names	T: Protein names
2	0	10	1343.56	0.00012804	166.86	408970000	7	DDRYCESIMR	W0UV28;P03950	W0UV28	RAA1;ANG	Angiogenin
0	1	10	1157.58	2.501e-06	181.87	3002300000	16	DINTFIHGNK	W0UV28;P03950	W0UV28	RAA1;ANG	Angiogenin
1	1	11	1313.68	1.8093e-13	227.36	1833000000	8	DINTFIHGNKR	W0UV28;P03950	W0UV28	RAA1;ANG	Angiogenin
1	0	13	1553.72	1.4679e-18	225.55	679260000	30	LHGGSPWPPCQYR	W0UV28;P03950	W0UV28	RAA1;ANG	Angiogenin
1	0	20	2266.15	1.0211e-56	274.82	1197600000	13	NVVVACENGLPVHLDQSIFR	W0UV28;P03950	W0UV28	RAA1;ANG	Angiogenin
0	1	9	1056.49	0.00045462	136.02	260290000	6	SSFQVTTCK	W0UV28;P03950	W0UV28	RAA1;ANG	Angiogenin
1	0	7	957.405	0.0066433	143.85	1412200000	11	YCESIMR	W0UV28;P03950	W0UV28	RAA1;ANG	Angiogenin
0	1	12	1522.72	9.6942e-16	224.25	1776800000	14	YTHFLTQHYDAK	W0UV28;P03950	W0UV28	RAA1;ANG	Angiogenin
1	1	16	1960.95	8.2554e-37	259.68	1843700000	32	YTHFLTQHYDAKPQGR	W0UV28;P03950	W0UV28	RAA1;ANG	Angiogenin
1	0	16	1549.88	1.2383e-05	118.52	2217800	1	ALIAGGGAPEIELALR	B7Z9L0;B7Z2Z8;A8K3C3;P50991-2;P50991;B7Z2F4	B7Z9L0	CCT4	T-complex protein 1 subunit delta
0	1	8	932.57	0.021135	82.671	3582200	2	AYILNLVK	B7Z9L0;B7Z2Z8;A8K3C3;P50991-2;P50991;B7Z2F4	B7Z9L0	CCT4	T-complex protein 1 subunit delta
0	1	13	1455.77	1.3463e-07	163.71	8205500	3	DALSDLALHFLNK	B7Z9L0;B7Z2Z8;A8K3C3;P50991-2;P50991;B7Z2F4	B7Z9L0	CCT4	T-complex protein 1 subunit delta
0	1	13	1455.77	0.055897	40.516	951300	1	GIHPTIISESFQK	B7Z9L0;B7Z2Z8;A8K3C3;P50991-2;P50991	B7Z9L0	CCT4	T-complex protein 1 subunit delta
0	1	12	1345.74	0.0049812	85.554	833720	3	IGLIQFCLSAPK	B7Z9L0;B7Z2Z8;A8K3C3;P50991-2;P50991;B7Z2F4	B7Z9L0	CCT4	T-complex protein 1 subunit delta
1	0	13	1356.72	0.011	73.877	1054900	2	VIDPATATSVDLR	B7Z9L0;B7Z2Z8;A8K3C3;P50991-2;P50991;B7Z2F4	B7Z9L0	CCT4	T-complex protein 1 subunit delta
1	0	9	1006.51	0.0029481	104.22	1199000	2	SEFLSTAPR	B4DYU9;A0A024R411;Q13416	B4DYU9	ORC2L;ORC2	Origin recognition complex subunit 2
0	1	12	1442.78	0.00055173	113.95	3553200	4	SILDQLDWIVNK	B4DYU9;A0A024R411;Q13416	B4DYU9	ORC2L;ORC2	Origin recognition complex subunit 2
1	0	18	2047	0.011145	54.004	2014000	1	SVLNSITEEVLDHMGTFR	B4DYU9;A0A024R411;Q13416	B4DYU9	ORC2L;ORC2	Origin recognition complex subunit 2
0	1	10	1204.58	0.030956	66.19	1067800	1	DCTVEMPILK	Q8IY44;Q5SQP8;P56545;P56545-2;X5D7T7;X5D8Y5;Q4KMQ8;Q13363-2;Q13363;D6RAX2;E7ESU7;E7EPF8;E9PGB1;Q9NSY3;E7EUB3	Q8IY44	CTBP2;CTBP1;DKFZp434B0914	C-terminal-binding protein 2;C-terminal-binding protein 1
0	1	19	2162	0.0087317	55.097	1224600	1	DLATVAFCDAQSTQEIHEK	Q8IY44;Q5SQP8;P56545;P56545-2	Q8IY44	CTBP2	C-terminal-binding protein 2
1	0	11	1118.61	1.6085e-05	160.77	3650900	2	GETLGLIGFGR	Q8IY44;Q5SQP8;P56545;P56545-2	Q8IY44	CTBP2	C-terminal-binding protein 2
1	0	9	1163.61	0.046871	63.426	1029200	1	NTWLYQALR	Q8IY44;Q5SQP8;P56545;P56545-2;A0A087WYL1	Q8IY44	CTBP2	C-terminal-binding protein 2
1	0	9	952.571	0.0022793	109.29	8197200	4	PLVALLDGR	Q8IY44;Q5SQP8;P56545;P56545-2;X5D7T7;X5D8Y5;Q4KMQ8;Q13363-2;Q13363;D6RAX2;E7ESU7;E7EPF8;E9PGB1;Q9NSY3;E7EUB3	Q8IY44	CTBP2;CTBP1;DKFZp434B0914	C-terminal-binding protein 2;C-terminal-binding protein 1
1	0	8	957.524	0.011631	96.668	11565000	2	VQSVEQIR	Q8IY44;Q5SQP8;P56545;P56545-2;A0A087WYL1;X5D7T7;X5D8Y5;Q4KMQ8;Q13363-2;Q13363;D6RAX2;E7ESU7;E7EPF8	Q8IY44	CTBP2;CTBP1	C-terminal-binding protein 2;C-terminal-binding protein 1
1	0	9	1046.47	0.013049	81.525	41030000	6	AELDDTPMR	P23246;Q9BSV4;Q86VG2;P23246-2;Q6PIX2	P23246	SFPQ	Splicing factor, proline- and glutamine-rich
1	0	7	785.476	0.0088748	166.78	227920000	8	ANLSLLR	P23246;Q9BSV4;Q86VG2;P23246-2;Q6PIX2	P23246	SFPQ	Splicing factor, proline- and glutamine-rich
1	0	8	885.492	0.0053029	116.25	538910000	9	AVVIVDDR	P23246;Q9BSV4;Q86VG2;P23246-2;Q6PIX2;A8K525;A0A0S2Z4Z9;Q15233;Q15233-2;H7C367;C9IZL7	P23246	SFPQ;NONO	Splicing factor, proline- and glutamine-rich;Non-POU domain-containing octamer-binding protein
1	0	13	1479.74	7.3452e-07	153.32	68923000	8	CSEGVFLLTTTPR	P23246;Q9BSV4;Q86VG2;P23246-2;Q6PIX2	P23246	SFPQ	Splicing factor, proline- and glutamine-rich
1	1	32	3595.8	0.00037307	59.094	1738100	2	CSEGVFLLTTTPRPVIVEPLEQLDDEDGLPEK	P23246;Q9BSV4;Q86VG2;P23246-2;Q6PIX2	P23246	SFPQ	Splicing factor, proline- and glutamine-rich
1	1	20	2427.11	1.0553e-32	222.09	117020000	6	DKLESEMEDAYHEHQANLLR	P23246;Q9BSV4;Q86VG2;P23246-2;H0Y9K7	P23246	SFPQ	Splicing factor, proline- and glutamine-rich
1	0	14	1761.77	6.9264e-19	217.39	187650000	16	FAQHGTFEYEYSQR	P23246;Q9BSV4;Q86VG2;P23246-2;Q6PIX2;H0Y9K7	P23246	SFPQ	Splicing factor, proline- and glutamine-rich
1	0	11	1142.62	5.4291e-05	137.4	227410000	16	FATHAAALSVR	P23246;Q9BSV4;Q86VG2;P23246-2;Q6PIX2	P23246	SFPQ	Splicing factor, proline- and glutamine-rich
1	0	15	1340.66	3.1817e-14	182.37	201260000	9	FGQGGAGPVGGQGPR	P23246;Q9BSV4;Q86VG2	P23246	SFPQ	Splicing factor, proline- and glutamine-rich
0	1	8	849.46	0.0020831	133.86	94008000	5	GIVEFASK	P23246;Q9BSV4;Q86VG2;P23246-2;Q6PIX2	P23246	SFPQ	Splicing factor, proline- and glutamine-rich
1	1	12	1244.69	0.0096992	107.34	25358000	1	GIVEFASKPAAR	P23246;Q9BSV4;Q86VG2;P23246-2;Q6PIX2	P23246	SFPQ	Splicing factor, proline- and glutamine-rich
1	0	12	1119.51	0.00035787	117.09	58779000	10	GMGPGTPAGYGR	P23246;Q9BSV4;Q86VG2	P23246	SFPQ	Splicing factor, proline- and glutamine-rich
0	1	8	881.413	0.010694	98.582	18171000	2	ISDSEGFK	P23246;Q9BSV4;Q86VG2;P23246-2;Q6PIX2	P23246	SFPQ	Splicing factor, proline- and glutamine-rich
0	1	16	1806.9	1.5367e-10	163.34	44154000	6	LFVGNLPADITEDEFK	P23246;Q9BSV4;Q86VG2;P23246-2;Q6PIX2	P23246	SFPQ	Splicing factor, proline- and glutamine-rich
1	1	17	1963.01	5.8391e-16	183.73	214240000	10	LFVGNLPADITEDEFKR	P23246;Q9BSV4;Q86VG2;P23246-2;Q6PIX2	P23246	SFPQ	Splicing factor, proline- and glutamine-rich
0	1	11	1415.62	0.00015428	119.27	15765000	2	MEELHNQEMQK	P23246;Q9BSV4;Q86VG2;P23246-2;H0Y9K7	P23246	SFPQ	Splicing factor, proline- and glutamine-rich
0	1	19	1770.71	9.4159e-06	124.98	6359600	4	MGGGGAMNMGDPYGSGGQK	P23246;Q9BSV4;Q86VG2;P23246-2;H0Y9K7;H0Y9U2	P23246	SFPQ	Splicing factor, proline- and glutamine-rich
1	0	23	2638.29	3.3575e-11	160.05	34641000	7	NLSPYVSNELLEEAFSQFGPIER	P23246;Q9BSV4;Q86VG2;P23246-2;Q6PIX2	P23246	SFPQ	Splicing factor, proline- and glutamine-rich
1	1	19	1801.93	0.0077137	65.467	4113900	4	PGGGPGLSTPGGHPKPPHR	P23246;Q9BSV4;P23246-2;Q6PIX2	P23246	SFPQ	Splicing factor, proline- and glutamine-rich
0	1	19	2134.07	1.5961e-43	257.06	41363000	9	PVIVEPLEQLDDEDGLPEK	P23246;Q9BSV4;Q86VG2;P23246-2;Q6PIX2	P23246	SFPQ	Splicing factor, proline- and glutamine-rich
1	0	22	2402.13	0.0036316	58.123	832280	1	QHHPPYHQQHHQGPPPGGPGGR	P23246;Q9BSV4;Q86VG2;P23246-2;Q6PIX2	P23246	SFPQ	Splicing factor, proline- and glutamine-rich
1	1	12	1571.72	1.1069e-06	156	33736000	7	RMEELHNQEMQK	P23246;Q9BSV4;Q86VG2;P23246-2;H0Y9K7	P23246	SFPQ	Splicing factor, proline- and glutamine-rich
3	0	9	1248.61	0.0034115	117.81	23340000	3	RREEEMMIR	P23246;Q9BSV4;Q86VG2;P23246-2;H0Y9K7	P23246	SFPQ	Splicing factor, proline- and glutamine-rich
1	0	12	1266.61	3.7569e-05	133.91	39136000	10	SPPPGMGLNQNR	P23246;Q86VG2;P23246-2;Q6PIX2	P23246	SFPQ	Splicing factor, proline- and glutamine-rich
0	1	11	1251.61	7.6195e-08	192.5	143500000	8	YGEPGEVFINK	P23246;Q9BSV4;Q86VG2;P23246-2;Q6PIX2	P23246	SFPQ	Splicing factor, proline- and glutamine-rich
0	1	13	1569.77	0.047824	55.196	339840	1	DYIMEPSIFNTLK	X6RLT1;H0UI80;Q8IXH7-4;Q8IXH7;B4E2K1;Q8IXH7-3	X6RLT1	NELFCD;TH1L	Negative elongation factor C/D
0	1	13	1357.76	1.3826e-05	143.94	5968600	3	GALNPADITVLFK	X6RLT1;H0UI80;Q8IXH7-4;Q8IXH7	X6RLT1	NELFCD;TH1L	Negative elongation factor C/D
1	0	11	1264.72	0.0032105	96.113	2520900	2	GYVLPVVSYIR	X6RLT1;H0UI80;Q8IXH7-4;Q8IXH7	X6RLT1	NELFCD;TH1L	Negative elongation factor C/D
1	0	7	833.425	0.020161	102.98	6930200	2	ALAIMCR	A0A0J9YYL3;A0A0J9YVP6;Q9UHX1-4;Q9UHX1-6;Q9UHX1-2;A0A0J9YVR6;E9PQ56;A0A0J9YXJ8;A0A0J9YXX5;Q9UHX1-3;Q9UHX1-5;Q9UHX1;A0A0J9YWM1;H0YEM1;E9PN18;E9PMU7;E9PL19	A0A0J9YYL3	PUF60	Poly(U)-binding-splicing factor PUF60
1	0	22	2386.12	0.00015525	98.443	3023100	4	AQSSQDAVSSMNLFDLGGQYLR	A0A0J9YYL3;A0A0J9YVP6;Q9UHX1-4;Q9UHX1-6;Q9UHX1-2;A0A0J9YVR6;E9PQ56;A0A0J9YXJ8;A0A0J9YXX5;Q9UHX1-3;Q9UHX1-5;Q9UHX1;A0A0J9YWM1;H0YEM1;H0YCP8	A0A0J9YYL3	PUF60	Poly(U)-binding-splicing factor PUF60
0	1	31	2793.55	2.1548e-06	78.978	12061000	3	AVTPPMPLLTPATPGGLPPAAAVAAAAATAK	A0A0J9YYL3;A0A0J9YVP6;Q9UHX1-4;Q9UHX1-6;Q9UHX1-2;A0A0J9YVR6;E9PQ56;A0A0J9YXJ8;A0A0J9YXX5;Q9UHX1-3;Q9UHX1-5;Q9UHX1;A0A0J9YWM1;H0YEM1;H0YCP8	A0A0J9YYL3	PUF60	Poly(U)-binding-splicing factor PUF60
0	1	9	1104.51	0.00078382	126.07	46749000	5	GYGFIEYEK	A0A0J9YYL3;A0A0J9YVP6;Q9UHX1-4;Q9UHX1-6;Q9UHX1-2;A0A0J9YVR6;E9PQ56;A0A0J9YXJ8;A0A0J9YXX5;Q9UHX1-3;Q9UHX1-5;Q9UHX1;A0A0J9YWM1;H0YEM1;H0YCP8	A0A0J9YYL3	PUF60	Poly(U)-binding-splicing factor PUF60
0	1	16	1816.88	4.8057e-08	135.02	36366000	4	IYVASVHQDLSDDDIK	A0A0J9YYL3;A0A0J9YVP6;Q9UHX1-4;Q9UHX1-6;Q9UHX1-2;A0A0J9YVR6;E9PQ56;A0A0J9YXJ8;A0A0J9YXX5;Q9UHX1-3;Q9UHX1-5;Q9UHX1;A0A0J9YWM1;H0YEM1;E9PN18	A0A0J9YYL3	PUF60	Poly(U)-binding-splicing factor PUF60
0	2	24	2682.32	0.0021603	55.744	3687200	1	IYVASVHQDLSDDDIKSVFEAFGK	A0A0J9YYL3;A0A0J9YVP6;Q9UHX1-4;Q9UHX1-6;Q9UHX1-2;A0A0J9YVR6;E9PQ56;A0A0J9YXJ8;A0A0J9YXX5;Q9UHX1-3;Q9UHX1-5;Q9UHX1;A0A0J9YWM1;H0YEM1	A0A0J9YYL3	PUF60	Poly(U)-binding-splicing factor PUF60
0	1	16	1760.97	1.0601e-12	172.43	35426000	7	LGLPPLTPEQQEALQK	A0A0J9YYL3;A0A0J9YVP6;Q9UHX1-4;Q9UHX1-6;Q9UHX1-2;A0A0J9YVR6;E9PQ56;A0A0J9YXJ8;A0A0J9YXX5;Q9UHX1-3;Q9UHX1-5;Q9UHX1;A0A0J9YWM1;H0YEM1;E9PN18;E9PMU7;E9PL19	A0A0J9YYL3	PUF60	Poly(U)-binding-splicing factor PUF60
0	1	10	1074.59	0.0034457	97.565	21890000	2	QAFAPFGPIK	A0A0J9YYL3;A0A0J9YVP6;Q9UHX1-4;Q9UHX1-6;Q9UHX1-2;A0A0J9YVR6;E9PQ56;A0A0J9YXJ8;A0A0J9YXX5;Q9UHX1-3;Q9UHX1-5;Q9UHX1;A0A0J9YWM1;H0YEM1;E9PN18;E9PMU7;H0YCP8;E9PL19	A0A0J9YYL3	PUF60	Poly(U)-binding-splicing factor PUF60
1	0	19	2207.12	0.0025389	67.153	1254200	1	QTIAHQQQQLTNLQMAAQR	A0A0J9YYL3;A0A0J9YVP6;Q9UHX1-4;Q9UHX1-6;Q9UHX1-2;A0A0J9YVR6;E9PQ56;E9PN18;E9PMU7	A0A0J9YYL3	PUF60	Poly(U)-binding-splicing factor PUF60
0	1	8	883.444	0.014605	90.601	26356000	2	SVFEAFGK	A0A0J9YYL3;A0A0J9YVP6;Q9UHX1-4;Q9UHX1-6;Q9UHX1-2;A0A0J9YVR6;E9PQ56;A0A0J9YXJ8;A0A0J9YXX5;Q9UHX1-3;Q9UHX1-5;Q9UHX1;A0A0J9YWM1;H0YEM1;H0YCP8	A0A0J9YYL3	PUF60	Poly(U)-binding-splicing factor PUF60
2	0	22	2361.24	3.0914e-05	118.05	24630000	4	VGRPSNIGQAQPIIDQLAEEAR	A0A0J9YYL3;A0A0J9YVP6;Q9UHX1-4;Q9UHX1-6;Q9UHX1-2;A0A0J9YVR6;E9PQ56;A0A0J9YXJ8;A0A0J9YXX5;Q9UHX1-3;Q9UHX1-5;Q9UHX1;A0A0J9YWM1;H0YEM1;E9PN18;E9PMU7	A0A0J9YYL3	PUF60	Poly(U)-binding-splicing factor PUF60
1	0	10	1206.59	0.0046352	93.839	13853000	5	VVAEVYDQER	A0A0J9YYL3;A0A0J9YVP6;Q9UHX1-4;Q9UHX1-6;Q9UHX1-2;A0A0J9YXJ8;A0A0J9YXX5;Q9UHX1-3;Q9UHX1-5;Q9UHX1	A0A0J9YYL3	PUF60	Poly(U)-binding-splicing factor PUF60
1	0	16	1875.93	2.2153e-56	262.66	16021000	6	VYVGSIYYELGEDTIR	A0A0J9YYL3;A0A0J9YVP6;Q9UHX1-4;Q9UHX1-6;Q9UHX1-2;A0A0J9YVR6;E9PQ56;A0A0J9YXJ8;A0A0J9YXX5;Q9UHX1-3;Q9UHX1-5;Q9UHX1;A0A0J9YWM1;H0YEM1;E9PN18;E9PMU7;E9PL19	A0A0J9YYL3	PUF60	Poly(U)-binding-splicing factor PUF60
0	1	15	1584.8	7.6931e-11	171.99	9167900	2	AAYNPGQAVPWNAVK	B3KTJ9;Q8N163-2;Q8N163;E5RFJ3;H0YC69;E5RGU7;H0YC58	B3KTJ9	CCAR2	Cell cycle and apoptosis regulator protein 2
1	0	13	1548.77	0.00043952	113.52	2535600	1	FAEFQYLQPGPPR	B3KTJ9;Q8N163-2;Q8N163;G3V119;H0YB24;E5RHJ4	B3KTJ9	CCAR2	Cell cycle and apoptosis regulator protein 2
0	1	9	995.492	0.019263	76.943	1143500	1	FSATEVTNK	B3KTJ9;Q8N163-2;Q8N163;G3V119;H0YB24;E2PSM9	B3KTJ9	CCAR2	Cell cycle and apoptosis regulator protein 2
1	0	31	3092.61	0.0030717	49.835	695800	1	NFSGTASTSLLGPPPGLLTPPVATELSQNAR	B3KTJ9;Q8N163-2;Q8N163;E5RFJ3;E5RGU7;E5RHH8	B3KTJ9	CCAR2	Cell cycle and apoptosis regulator protein 2
1	0	16	1802	0.014969	56.29	5185100	2	QGILGAQPQLIFQPHR	B3KTJ9;Q8N163-2;Q8N163;E5RFJ3;H0YC69;H0YC58	B3KTJ9	CCAR2	Cell cycle and apoptosis regulator protein 2
0	1	15	1497.87	0.00028502	100.73	10971000	3	SPAPPLLHVAALGQK	B3KTJ9;Q8N163-2;Q8N163;E5RFJ3;H0YC69;E5RGU7;H0YC58	B3KTJ9	CCAR2	Cell cycle and apoptosis regulator protein 2
1	0	14	1587.89	4.4465e-16	212.83	17963000	7	VLLLSSPGLEELYR	B3KTJ9;Q8N163-2;Q8N163;E5RHJ4	B3KTJ9	CCAR2	Cell cycle and apoptosis regulator protein 2
0	1	11	1239.72	0.0010635	109.39	5073700	2	VQTLSNQPLLK	B3KTJ9;Q8N163-2;Q8N163;E5RFJ3;H0YC69;E5RGU7;H0YC58	B3KTJ9	CCAR2	Cell cycle and apoptosis regulator protein 2
1	0	10	1279.63	0.0071333	86.014	2086700	2	VVTQNICQYR	B3KTJ9;Q8N163-2;Q8N163;G3V119;H0YB24;E2PSM9;A0A087X2B6	B3KTJ9	CCAR2	Cell cycle and apoptosis regulator protein 2
1	0	9	982.618	0.00054938	131.11	4128300	6	AGLVELLLR	A0A024R732;Q13425;Q13425-2	A0A024R732	SNTB2	Beta-2-syntrophin
1	0	16	1829.85	0.036815	46.41	1341200	1	DAWASPCHSYPLVATR	A0A024R732;Q13425	A0A024R732	SNTB2	Beta-2-syntrophin
1	0	12	1581.73	0.00042672	115.92	794990	3	DLLLYDCMPWTR	A0A024R732;Q13425	A0A024R732	SNTB2	Beta-2-syntrophin
1	0	11	1173.61	0.041312	60.691	1305800	1	IFPGLAADQSR	A0A024R732;Q13425;Q13425-2;A0A0G2JM75;J3KT21;H0YCS0	A0A024R732	SNTB2	Beta-2-syntrophin
1	1	13	1464.78	0.038179	41.48	1053600	1	QATHDQAVQALKR	A0A024R732;Q13425;Q13425-2;A0A0G2JM75;J3KT21;H0YCS0	A0A024R732	SNTB2	Beta-2-syntrophin
1	1	14	1564.7	0.00024506	123.02	2045500	2	ADKEAAFDDAVEER	Q09028-3;Q09028;E9PNS2;E9PIC4;E9PNS6	Q09028-3	RBBP4	Histone-binding protein RBBP4
0	1	12	1127.52	0.0072653	82.202	4244400	2	GEFGGFGSVSGK	Q09028-3;Q09028;Q09028-4;Q09028-2;C9JPP3	Q09028-3	RBBP4	Histone-binding protein RBBP4
1	1	16	1804.82	0.0044603	78.69	2564400	1	HPSKPDPSGECNPDLR	Q09028-3;Q09028;Q09028-4;Q09028-2	Q09028-3	RBBP4	Histone-binding protein RBBP4
1	0	7	933.474	0.019523	104.37	10062000	2	LMIWDTR	Q09028-3;Q09028;Q09028-4;Q09028-2;H0YF10;E9PC52;Q6FHQ0;Q16576;Q16576-2;Q5JP02;H0YCT5;H0YDK2;A8K6A2;Q5JP01	Q09028-3	RBBP4;RBBP7	Histone-binding protein RBBP4;Histone-binding protein RBBP7
0	1	8	973.523	0.0078122	106.88	18483000	3	LNVWDLSK	Q09028-3;Q09028;Q09028-4;Q09028-2;H0YF10;E9PC52;Q6FHQ0;Q16576;Q16576-2;Q5JP02;H0YCT5;H0YDK2;A8K6A2;H0YEU5;B4DRT0;Q5JNZ6	Q09028-3	RBBP4;RBBP7	Histone-binding protein RBBP4;Histone-binding protein RBBP7
0	1	13	1470.72	3.9033e-18	217.46	21877000	6	TPSSDVLVFDYTK	Q09028-3;Q09028;Q09028-4;Q09028-2;H0YF10;E9PC52;Q6FHQ0;Q16576;Q16576-2;Q5JP01	Q09028-3	RBBP4;RBBP7	Histone-binding protein RBBP4;Histone-binding protein RBBP7
1	0	8	972.539	0.0036033	125.16	33780000	6	TVALWDLR	Q09028-3;Q09028;Q09028-4;Q09028-2;H0YF10;E9PC52;Q6FHQ0;Q16576;Q16576-2;Q5JP02;H0YCT5;H0YDK2;A8K6A2;H0YEU5;B4DRT0	Q09028-3	RBBP4;RBBP7	Histone-binding protein RBBP4;Histone-binding protein RBBP7
0	1	11	1071.53	0.01394	75.819	8675400	2	AAPGAEFAPNK	A8K525;A0A0S2Z4Z9;Q15233;Q15233-2	A8K525	NONO	Non-POU domain-containing octamer-binding protein
1	1	12	1227.64	0.000155	137.01	41683000	4	AAPGAEFAPNKR	A8K525;A0A0S2Z4Z9;Q15233;Q15233-2	A8K525	NONO	Non-POU domain-containing octamer-binding protein
0	1	8	899.486	2.4676e-05	151.04	168030000	9	AGEVFIHK	A8K525;A0A0S2Z4Z9;Q15233;Q15233-2;H7C367;C9JYS8;C9IZL7;A0A0S2Z4E7	A8K525	NONO	Non-POU domain-containing octamer-binding protein
0	1	7	832.436	0.027455	91.9	38410000	2	ALIEMEK	A8K525;A0A0S2Z4Z9;Q15233;Q15233-2;H7C367;C9JYS8	A8K525	NONO	Non-POU domain-containing octamer-binding protein
1	0	8	885.492	0.0053029	116.25	538910000	9	AVVIVDDR	P23246;Q9BSV4;Q86VG2;P23246-2;Q6PIX2;A8K525;A0A0S2Z4Z9;Q15233;Q15233-2;H7C367;C9IZL7	P23246	SFPQ;NONO	Splicing factor, proline- and glutamine-rich;Non-POU domain-containing octamer-binding protein
1	0	13	1513.72	3.7753e-18	217.88	66719000	7	CSEGSFLLTTFPR	A8K525;A0A0S2Z4Z9;Q15233;Q15233-2;H7C367	A8K525	NONO	Non-POU domain-containing octamer-binding protein
1	1	32	3635.7	0.001172	57.222	966890	1	CSEGSFLLTTFPRPVTVEPMDQLDDEEGLPEK	A8K525;A0A0S2Z4Z9;Q15233;Q15233-2;H7C367	A8K525	NONO	Non-POU domain-containing octamer-binding protein
1	0	11	1247.61	2.6565e-06	169.58	167860000	10	FACHSASLTVR	A8K525;A0A0S2Z4Z9;Q15233;Q15233-2;C9JYS8;C9IZL7	A8K525	NONO	Non-POU domain-containing octamer-binding protein
1	0	14	1694.74	7.6873e-19	215.96	146930000	15	FAQPGSFEYEYAMR	A8K525;A0A0S2Z4Z9;Q15233;Q15233-2;H7C367;C9JYS8	A8K525	NONO	Non-POU domain-containing octamer-binding protein
1	0	22	2162.06	1.0892e-83	312.58	52476000	8	FGQAATMEGIGAIGGTPPAFNR	A8K525;A0A0S2Z4Z9;Q15233;Q15233-2	A8K525	NONO	Non-POU domain-containing octamer-binding protein
0	1	8	835.444	0.016136	87.476	76194000	4	GIVEFSGK	A8K525;A0A0S2Z4Z9;Q15233;Q15233-2;H7C367;C9IZL7	A8K525	NONO	Non-POU domain-containing octamer-binding protein
1	0	7	762.366	0.03466	83.753	16295000	1	GTFPDAR	A8K525;A0A0S2Z4Z9;Q15233;Q15233-2	A8K525	NONO	Non-POU domain-containing octamer-binding protein
1	0	9	1179.56	0.00053937	117.01	60683000	8	HEHQVMLMR	A8K525;A0A0S2Z4Z9;Q15233;Q15233-2;H7C367;C9JYS8	A8K525	NONO	Non-POU domain-containing octamer-binding protein
1	0	9	1078.48	0.0021152	110.53	10514000	4	LEMEMEAAR	A8K525;A0A0S2Z4Z9;Q15233;Q15233-2;H7C367;C9JYS8	A8K525	NONO	Non-POU domain-containing octamer-binding protein
1	0	16	1858.91	2.1998e-06	131.18	22215000	10	LFVGNLPPDITEEEMR	A8K525;A0A0S2Z4Z9;Q15233;C9JYS8;C9IZL7;A0A0S2Z4E7;C9J4X2	A8K525	NONO	Non-POU domain-containing octamer-binding protein
0	1	11	1383.65	6.3194e-27	263.07	53218000	11	MEELHNQEVQK	A8K525;A0A0S2Z4Z9;Q15233;Q15233-2;H7C367;C9JYS8	A8K525	NONO	Non-POU domain-containing octamer-binding protein
1	1	12	1539.75	0.0001862	119.74	17471000	2	MEELHNQEVQKR	A8K525;A0A0S2Z4Z9;Q15233;Q15233-2;H7C367;C9JYS8	A8K525	NONO	Non-POU domain-containing octamer-binding protein
1	0	15	1537.66	0.00039706	102.9	5478600	6	MGQMAMGGAMGINNR	A8K525;A0A0S2Z4Z9;Q15233;Q15233-2	A8K525	NONO	Non-POU domain-containing octamer-binding protein
1	0	23	2667.32	1.1965e-07	141.36	12603000	4	NLPQYVSNELLEEAFSVFGQVER	A8K525;A0A0S2Z4Z9;Q15233;Q15233-2;C9IZL7	A8K525	NONO	Non-POU domain-containing octamer-binding protein
0	1	19	2139.99	0.00042014	95.227	1222200	1	PVTVEPMDQLDDEEGLPEK	A8K525;A0A0S2Z4Z9;Q15233;Q15233-2;H7C367	A8K525	NONO	Non-POU domain-containing octamer-binding protein
1	1	12	1539.75	1.3763e-11	209.25	45209000	8	RMEELHNQEVQK	A8K525;A0A0S2Z4Z9;Q15233;Q15233-2;H7C367;C9JYS8	A8K525	NONO	Non-POU domain-containing octamer-binding protein
1	0	9	1085.55	0.00030007	163.38	102500000	10	VELDNMPLR	A8K525;A0A0S2Z4Z9;Q15233;Q15233-2;C9JYS8;C9IZL7;A0A0S2Z4E7;C9J4X2	A8K525	NONO	Non-POU domain-containing octamer-binding protein
1	0	16	2046.95	0.0023998	76.073	1516700	2	EDENSWFNLFVIHQNR	Q05D78;F8W7U8;A0A024R395;P49959-2;P49959;P49959-3;F5GXT0	Q05D78	MRE11A	Double-strand break repair protein MRE11A
1	0	13	1491.76	4.3447e-07	158.52	3717100	2	GNDTFVTLDEILR	Q05D78;F8W7U8;A0A024R395;P49959-2;P49959;P49959-3;F5GXT0;Q9BS79;F5H742;A0A0S2Z438;F5H256	Q05D78	MRE11A	Double-strand break repair protein MRE11A
1	0	13	1402.75	0.00073788	107.53	1955200	1	IALYGLGSIPDER	Q05D78;F8W7U8;A0A024R395;P49959-2;P49959;P49959-3;F5GXT0;Q9BS79	Q05D78	MRE11A	Double-strand break repair protein MRE11A
0	1	10	1124.68	0.00074444	115.7	2426100	4	IDISPVLLQK	Q05D78;F8W7U8;A0A024R395;P49959-2;P49959;P49959-3;F5GXT0;Q9BS79	Q05D78	MRE11A	Double-strand break repair protein MRE11A
1	1	13	1473.81	0.0026913	92.112	28342000	8	LGNSHQPEKPLVR	Q05D78;F8W7U8;A0A024R395;P49959-2;P49959;P49959-3	Q05D78	MRE11A	Double-strand break repair protein MRE11A
1	1	12	1314.75	0.014021	71.888	12835000	2	LITKPSEGTTLR	Q05D78;F8W7U8;A0A024R395;P49959-2;P49959;P49959-3	Q05D78	MRE11A	Double-strand break repair protein MRE11A
1	0	10	1171.66	0.00030161	132.03	2657200	0	NVQLSLLTER	Q05D78;F8W7U8;A0A024R395;P49959-2;P49959;P49959-3	Q05D78	MRE11A	Double-strand break repair protein MRE11A
0	1	22	2600.24	0.00022281	82.865	819790	2	QFFMEDIVLANHPDIFNPDNPK	Q05D78;F8W7U8;A0A024R395;P49959-2;P49959;P49959-3	Q05D78	MRE11A	Double-strand break repair protein MRE11A
1	0	14	1571.76	0.00049168	108.58	1770600	1	VDYSGGFEPFSVLR	Q05D78;F8W7U8;A0A024R395;P49959-2;P49959;P49959-3	Q05D78	MRE11A	Double-strand break repair protein MRE11A
0	1	20	1921.04	1.6804e-11	165.03	6850500	2	ATTLSNAVSSLASTGLSLTK	B5BU72;A0A024R5L7;A8K5U9;A0A024R5P1;Q13492-3;Q13492-2;Q13492-5;Q13492;Q13492-4;Q8N6B4	B5BU72	PICALM;MLL/CALM fusion	Phosphatidylinositol-binding clathrin assembly protein
0	1	15	1455.77	0.018489	54.281	8578900	2	ITAAQHSVTGSAVSK	B5BU72;A0A024R5L7;A8K5U9;A0A024R5P1;Q13492-3;Q13492-2;Q13492-5;Q13492;E9PJT1;E9PK13	B5BU72	PICALM	Phosphatidylinositol-binding clathrin assembly protein
0	1	15	1706.92	2.8698e-22	222.45	4314700	2	LFAAYNEGIINLLEK	B5BU72;A0A024R5L7;A8K5U9;A0A024R5P1;Q13492-3;Q13492-2;Q13492-5;Q13492;Q13492-4	B5BU72	PICALM	Phosphatidylinositol-binding clathrin assembly protein
0	1	12	1424.73	0.002896	99.834	2383200	1	NTLFNLSNFLDK	B5BU72;A0A024R5L7;A8K5U9;A0A024R5P1;Q13492-3;Q13492-2;Q13492-5;Q13492;Q13492-4;E5RFU0;E5RHK9;E9PKP6;E9PI56;E5RFC6;E5RK51;E5RIJ5;E9PLJ8;E5RGY9;E9PDG8;H0UI15;O60641-3;O60641-4;O60641	B5BU72	PICALM;SNAP91	Phosphatidylinositol-binding clathrin assembly protein;Clathrin coat assembly protein AP180
1	1	25	2654.32	8.3247e-05	80.733	16871000	6	DGNASGTTLLEALDCILPPTRPTDK	Q6IPT9;Q6IPS9;Q6IPN6;Q53HR5;Q53HQ7;Q53HM9;P68104;A8K9C4;Q53G85;Q5VTE0;Q96RE1;Q53GE9;Q53GA1;B4DV42;A0A087WVQ9;P68104-2;Q8IUB0;Q53HR1;A0A087WV01;Q9H2I7;Q504Z0;B4DNE0;Q53G89;Q6P4C9;Q96CD8;Q96C29;Q8TBL1;Q6P082;Q16577	Q6IPT9	EEF1A1;EEF1A1P5;EEF1A1L14;PTI-1	Elongation factor 1-alpha;Elongation factor 1-alpha 1;Putative elongation factor 1-alpha-like 3
2	1	28	3020.56	4.9254e-10	143	154020000	12	DGNASGTTLLEALDCILPPTRPTDKPLR	Q6IPT9;Q6IPS9;Q6IPN6;Q53HR5;Q53HQ7;Q53HM9;P68104;A8K9C4;Q53G85;Q5VTE0;Q96RE1;Q53GE9;Q53GA1;B4DV42;A0A087WVQ9;P68104-2;Q8IUB0;Q53HR1;A0A087WV01;Q9H2I7;Q504Z0;B4DNE0;Q53G89;Q6P4C9;Q96CD8;Q96C29;Q8TBL1;Q6P082	Q6IPT9	EEF1A1;EEF1A1P5;EEF1A1L14	Elongation factor 1-alpha;Elongation factor 1-alpha 1;Putative elongation factor 1-alpha-like 3
0	1	12	1313.73	5.1406e-09	182.41	548450000	22	EHALLAYTLGVK	Q6IPT9;Q6IPS9;Q6IPN6;Q53HR5;Q53HQ7;Q53HM9;P68104;A8K9C4;Q53G85;Q5VTE0;Q96RE1;Q53GE9;Q53GA1;B4DV42;Q8IUB0;Q53HR1;A0A087WV01;Q9H2I7;Q9NZS6;Q53G89;A9X7H1;Q16577;Q05639;Q59GP5	Q6IPT9	EEF1A1;EEF1A1P5;EEF1A1L14;PTI-1;EEF1A2	Elongation factor 1-alpha;Elongation factor 1-alpha 1;Putative elongation factor 1-alpha-like 3;Elongation factor 1-alpha 2
0	1	7	838.444	0.022972	98.418	72771000	1	EVSTYIK	Q6IPT9;Q6IPS9;Q6IPN6;Q53HR5;Q53HQ7;Q53HM9;P68104;A8K9C4;Q53G85;Q5VTE0;Q96RE1;Q53GA1;B4DV42;A0A087WVQ9;P68104-2;Q8IUB0;Q53HR1;A0A087WV01;Q9H2I7;Q504Z0;Q53G89;Q6P4C9;B4E2C5;A9X7H1;Q16577	Q6IPT9	EEF1A1;EEF1A1P5;EEF1A1L14;PTI-1	Elongation factor 1-alpha;Elongation factor 1-alpha 1;Putative elongation factor 1-alpha-like 3
1	0	11	1024.6	4.2156e-05	144.55	1161800000	17	IGGIGTVPVGR	Q6IPT9;Q6IPS9;Q6IPN6;Q53HR5;Q53HQ7;Q53HM9;P68104;A8K9C4;Q53G85;Q5VTE0;Q96RE1;Q53GE9;Q53GA1;A0A087WVQ9;P68104-2;Q8IUB0;Q53HR1;Q504Z0;B4DNE0;Q9NZS6;Q53G89;Q6P4C9;B4E2C5;Q96CD8;Q96C29;Q8TBL1;Q6P082;Q16577;Q05639;Q59GP5;Q14222	Q6IPT9	EEF1A1;EEF1A1P5;EEF1A1L14;PTI-1;EEF1A2;EEF1A	Elongation factor 1-alpha;Elongation factor 1-alpha 1;Putative elongation factor 1-alpha-like 3;Elongation factor 1-alpha 2
0	1	32	3566.66	3.5732e-10	113.02	32232000	6	IGYNPDTVAFVPISGWNGDNMLEPSANMPWFK	Q6IPT9;Q6IPS9;Q6IPN6;Q53HR5;Q53HQ7;Q53HM9;P68104;A8K9C4;Q53G85;Q5VTE0;Q96RE1;Q53GE9;Q53GA1;B4DV42;A0A087WVQ9;P68104-2;Q8IUB0;Q53HR1;A0A087WV01;Q9H2I7;Q504Z0;Q9NZS6;Q53G89;Q6P4C9;B4E2C5;Q96CD8;A9X7H1;Q16577	Q6IPT9	EEF1A1;EEF1A1P5;EEF1A1L14;PTI-1	Elongation factor 1-alpha;Elongation factor 1-alpha 1;Putative elongation factor 1-alpha-like 3
0	2	33	3694.76	2.1951e-06	76.001	3369900	1	KIGYNPDTVAFVPISGWNGDNMLEPSANMPWFK	Q6IPT9;Q6IPS9;Q6IPN6;Q53HR5;Q53HQ7;Q53HM9;P68104;A8K9C4;Q53G85;Q5VTE0;Q96RE1;Q53GE9;Q53GA1;B4DV42;A0A087WVQ9;P68104-2;Q8IUB0;Q53HR1;A0A087WV01;Q9H2I7;Q504Z0;Q9NZS6;Q53G89;Q6P4C9;B4E2C5;Q96CD8;A9X7H1;Q16577	Q6IPT9	EEF1A1;EEF1A1P5;EEF1A1L14;PTI-1	Elongation factor 1-alpha;Elongation factor 1-alpha 1;Putative elongation factor 1-alpha-like 3
0	1	8	974.544	0.0026183	130.75	1053800000	11	LPLQDVYK	Q6IPT9;Q6IPS9;Q6IPN6;Q53HR5;Q53HQ7;Q53HM9;P68104;A8K9C4;Q53G85;Q5VTE0;Q96RE1;Q53GE9;Q53GA1;B4DV42;A0A087WVQ9;P68104-2;Q8IUB0;Q53HR1;A0A087WV01;Q9H2I7;Q504Z0;B4DNE0;Q9NZS6;Q6P4C9;B4E2C5;Q96CD8;A9X7H1;Q96C29;Q8TBL1;Q6P082;Q05639;Q59GP5	Q6IPT9	EEF1A1;EEF1A1P5;EEF1A1L14;EEF1A2	Elongation factor 1-alpha;Elongation factor 1-alpha 1;Putative elongation factor 1-alpha-like 3;Elongation factor 1-alpha 2
0	1	11	1281.55	0.013104	72.289	453500	1	MDSTEPPYSQK	Q6IPT9;Q6IPS9;Q6IPN6;Q53HR5;Q53HQ7;Q53HM9;P68104;A8K9C4;Q53G85;Q5VTE0;Q96RE1;Q53GE9;Q53GA1;B4DV42;Q8IUB0;Q53HR1;A0A087WV01;Q9H2I7;Q504Z0;Q53G89;B4E2C5;A9X7H1;Q16577	Q6IPT9	EEF1A1;EEF1A1P5;EEF1A1L14;PTI-1	Elongation factor 1-alpha;Elongation factor 1-alpha 1;Putative elongation factor 1-alpha-like 3
0	1	41	4384.12	0.00062032	47.156	67412000	7	NDPPMEAAGFTAQVIILNHPGQISAGYAPVLDCHTAHIACK	Q6IPT9;Q6IPS9;Q6IPN6;Q53HR5;Q53HQ7;Q53HM9;P68104;A8K9C4;Q53G85;Q96RE1;Q53GE9;Q53GA1;B4DV42;A0A087WVQ9;P68104-2;Q8IUB0;Q53HR1;A0A087WV01;Q9H2I7;Q504Z0;B4DNE0;Q9NZS6;Q6P4C9;B4E2C5;Q96CD8;Q96C29;Q8TBL1;Q6P082;Q96EB3	Q6IPT9	EEF1A1;EEF1A1L14	Elongation factor 1-alpha;Elongation factor 1-alpha 1
0	1	29	2908.43	5.7266e-18	169.8	64200000	11	NMITGTSQADCAVLIVAAGVGEFEAGISK	Q6IPT9;Q6IPS9;Q6IPN6;Q53HR5;Q53HQ7;Q53HM9;P68104;A8K9C4;Q53G85;Q5VTE0;Q96RE1;Q53GE9;Q53GA1;B4DV42;A0A087WVQ9;P68104-2;Q53HR1;A0A087WV01;Q9H2I7;B4DNE0;Q9NZS6;Q53G89;A9X7H1;Q05639;Q59GP5;Q5JR01	Q6IPT9	EEF1A1;EEF1A1P5;EEF1A1L14;EEF1A2	Elongation factor 1-alpha;Elongation factor 1-alpha 1;Putative elongation factor 1-alpha-like 3;Elongation factor 1-alpha 2
0	1	17	1787.95	5.4649e-08	138.05	16055000	7	PGMVVTFAPVNVTTEVK	Q6IPT9;Q6IPS9;Q6IPN6;Q53HR5;Q53HQ7;Q53HM9;P68104;A8K9C4;Q53G85;Q5VTE0;Q96RE1;Q53GE9;B4DV42;A0A087WVQ9;P68104-2;Q8IUB0;Q53HR1;Q504Z0;B4DNE0;Q9NZS6;Q53G89;Q6P4C9;B4E2C5;Q96CD8;Q96C29;Q8TBL1;Q6P082;Q14222	Q6IPT9	EEF1A1;EEF1A1P5;EEF1A1L14;EEF1A	Elongation factor 1-alpha;Elongation factor 1-alpha 1;Putative elongation factor 1-alpha-like 3
1	1	11	1340.78	5.0395e-05	138.76	9254000	1	PLRLPLQDVYK	Q6IPT9;Q6IPS9;Q6IPN6;Q53HR5;Q53HQ7;Q53HM9;P68104;A8K9C4;Q53G85;Q5VTE0;Q96RE1;Q53GE9;Q53GA1;B4DV42;A0A087WVQ9;P68104-2;Q8IUB0;Q53HR1;A0A087WV01;Q9H2I7;Q504Z0;B4DNE0;Q9NZS6;Q6P4C9;B4E2C5;Q96CD8;A9X7H1;Q96C29;Q8TBL1;Q6P082;Q05639;Q59GP5	Q6IPT9	EEF1A1;EEF1A1P5;EEF1A1L14;EEF1A2	Elongation factor 1-alpha;Elongation factor 1-alpha 1;Putative elongation factor 1-alpha-like 3;Elongation factor 1-alpha 2
1	0	15	1753.78	1.3827e-06	141.65	894670	1	PMCVESFSDYPPLGR	Q6IPT9;Q6IPS9;Q6IPN6;Q53HR5;Q53HQ7;Q53HM9;P68104;A8K9C4;Q53G85;Q5VTE0;Q96RE1;Q53GE9;Q53GA1;B4DV42;A0A087WVQ9;P68104-2;Q8IUB0;Q53HR1;Q504Z0;B4DNE0;Q9NZS6;Q53G89;Q6P4C9;B4E2C5;Q96CD8;Q96C29;Q8TBL1;Q6P082;Q96EB3;Q14222;Q2F837	Q6IPT9	EEF1A1;EEF1A1P5;EEF1A1L14;EEF1A	Elongation factor 1-alpha;Elongation factor 1-alpha 1;Putative elongation factor 1-alpha-like 3
0	1	8	869.533	0.0093483	101.33	454180000	7	QLIVGVNK	Q6IPT9;Q6IPS9;Q6IPN6;Q53HR5;Q53HQ7;Q53HM9;P68104;A8K9C4;Q53G85;Q5VTE0;Q96RE1;Q53GE9;Q53GA1;B4DV42;Q8IUB0;Q53HR1;A0A087WV01;Q9H2I7;Q9NZS6;Q53G89;A9X7H1;Q16577;Q05639;Q59GP5	Q6IPT9	EEF1A1;EEF1A1P5;EEF1A1L14;PTI-1;EEF1A2	Elongation factor 1-alpha;Elongation factor 1-alpha 1;Putative elongation factor 1-alpha-like 3;Elongation factor 1-alpha 2
0	1	9	913.56	0.00091006	123.35	193710000	3	QTVAVGVIK	Q6IPT9;Q6IPS9;Q6IPN6;Q53HR5;Q53HQ7;Q53HM9;P68104;A8K9C4;Q53G85;Q5VTE0;Q96RE1;Q53GE9;Q53GA1;B4DV42;A0A087WVQ9;P68104-2;Q8IUB0;Q53HR1;Q504Z0;B4DNE0;Q9NZS6;Q53G89;Q6P4C9;B4E2C5;Q96CD8;Q96C29;Q8TBL1;Q6P082;Q16577;Q05639;Q96EB3;Q14222;Q2F837	Q6IPT9	EEF1A1;EEF1A1P5;EEF1A1L14;PTI-1;EEF1A2;EEF1A	Elongation factor 1-alpha;Elongation factor 1-alpha 1;Putative elongation factor 1-alpha-like 3;Elongation factor 1-alpha 2
0	1	13	1258.62	7.6424e-06	146.79	25444000	2	SGDAAIVDMVPGK	Q6IPT9;Q6IPS9;Q6IPN6;Q53HR5;Q53HQ7;Q53HM9;P68104;A8K9C4;Q53G85;Q5VTE0;Q96RE1;Q53GE9;Q53GA1;B4DV42;A0A087WVQ9;P68104-2;Q8IUB0;Q53HR1;A0A087WV01;Q9H2I7;Q504Z0;B4DNE0;Q9NZS6;Q53G89;Q6P4C9;B4E2C5;Q96CD8;Q96C29;Q8TBL1;Q6P082;Q16577;Q96EB3;Q2F837	Q6IPT9	EEF1A1;EEF1A1P5;EEF1A1L14;PTI-1	Elongation factor 1-alpha;Elongation factor 1-alpha 1;Putative elongation factor 1-alpha-like 3
1	1	28	2994.39	7.359e-14	156.7	173640000	19	SGDAAIVDMVPGKPMCVESFSDYPPLGR	Q6IPT9;Q6IPS9;Q6IPN6;Q53HR5;Q53HQ7;Q53HM9;P68104;A8K9C4;Q53G85;Q5VTE0;Q96RE1;Q53GE9;Q53GA1;B4DV42;A0A087WVQ9;P68104-2;Q8IUB0;Q53HR1;Q504Z0;B4DNE0;Q9NZS6;Q53G89;Q6P4C9;B4E2C5;Q96CD8;Q96C29;Q8TBL1;Q6P082;Q96EB3;Q2F837	Q6IPT9	EEF1A1;EEF1A1P5;EEF1A1L14	Elongation factor 1-alpha;Elongation factor 1-alpha 1;Putative elongation factor 1-alpha-like 3
0	1	10	1119.59	0.0021224	102.06	586100000	13	STTTGHLIYK	Q6IPT9;Q6IPS9;Q6IPN6;Q53HR5;Q53HQ7;Q53HM9;P68104;Q53G85;Q5VTE0;Q53GE9;Q53GA1;A0A087WVQ9;P68104-2;A0A087WV01;Q9H2I7;B4DNE0;Q05639;Q5JR01;A6PW80;Q6NS35;Q6NSH7	Q6IPT9	EEF1A1;EEF1A1P5;EEF1A2	Elongation factor 1-alpha;Elongation factor 1-alpha 1;Putative elongation factor 1-alpha-like 3;Elongation factor 1-alpha 2
0	1	15	1587.87	3.7603e-19	212.95	221710000	19	THINIVVIGHVDSGK	Q6IPT9;Q6IPS9;Q6IPN6;Q53HR5;Q53HQ7;Q53HM9;P68104;A8K9C4;Q53G85;Q5VTE0;Q53GE9;Q53GA1;A0A087WVQ9;P68104-2;A0A087WV01;Q9H2I7;B4DNE0;Q05639;Q5JR01;A6PW80;Q6NS35;Q6NSH7	Q6IPT9	EEF1A1;EEF1A1P5;EEF1A2	Elongation factor 1-alpha;Elongation factor 1-alpha 1;Putative elongation factor 1-alpha-like 3;Elongation factor 1-alpha 2
0	2	24	2514.38	1.0401e-06	132.67	1026300000	29	VETGVLKPGMVVTFAPVNVTTEVK	Q6IPT9;Q6IPS9;Q6IPN6;Q53HR5;Q53HQ7;Q53HM9;P68104;A8K9C4;Q53G85;Q5VTE0;Q96RE1;Q53GE9;B4DV42;A0A087WVQ9;P68104-2;Q8IUB0;Q504Z0;B4DNE0;Q9NZS6;Q53G89;Q6P4C9;B4E2C5;Q96CD8;Q96C29;Q8TBL1;Q6P082;Q14222	Q6IPT9	EEF1A1;EEF1A1P5;EEF1A1L14;EEF1A	Elongation factor 1-alpha;Elongation factor 1-alpha 1;Putative elongation factor 1-alpha-like 3
0	2	13	1599.84	8.741e-06	150.9	10891000	4	YEEIVKEVSTYIK	Q6IPT9;Q6IPS9;Q6IPN6;Q53HR5;Q53HQ7;Q53HM9;P68104;A8K9C4;Q5VTE0;Q96RE1;Q53GA1;B4DV42;A0A087WVQ9;P68104-2;Q8IUB0;Q53HR1;A0A087WV01;Q9H2I7;Q504Z0;Q53G89;B4E2C5;A9X7H1;Q16577	Q6IPT9	EEF1A1;EEF1A1P5;EEF1A1L14;PTI-1	Elongation factor 1-alpha;Elongation factor 1-alpha 1;Putative elongation factor 1-alpha-like 3
1	0	12	1403.72	3.9951e-07	164.9	817670000	24	YYVTIIDAPGHR	Q6IPT9;Q6IPS9;Q6IPN6;Q53HR5;Q53HQ7;Q53HM9;P68104;A8K9C4;Q53G85;Q5VTE0;Q96RE1;Q53GE9;Q53GA1;B4DV42;A0A087WVQ9;P68104-2;A0A087WV01;Q9H2I7;B4DNE0;Q9NZS6;A9X7H1;Q16577;Q5JR01;A6PW80	Q6IPT9	EEF1A1;EEF1A1P5;EEF1A1L14;PTI-1	Elongation factor 1-alpha;Elongation factor 1-alpha 1;Putative elongation factor 1-alpha-like 3
1	1	16	1906.99	0.031587	47.037	1249100	1	YYVTIIDAPGHRDFIK	Q6IPT9;Q6IPS9;Q6IPN6;Q53HR5;Q53HQ7;Q53HM9;P68104;A8K9C4;Q53G85;Q5VTE0;Q96RE1;Q53GE9;Q53GA1;B4DV42;A0A087WVQ9;P68104-2;A0A087WV01;Q9H2I7;B4DNE0;Q9NZS6;A9X7H1;Q5JR01;A6PW80	Q6IPT9	EEF1A1;EEF1A1P5;EEF1A1L14	Elongation factor 1-alpha;Elongation factor 1-alpha 1;Putative elongation factor 1-alpha-like 3
1	0	10	1057.6	0.00073616	115.78	18964000	6	AAGVVLEMIR	Q9Y230;B3KNL2;Q9Y230-2;M0R0Y3;B4DW30;X6R2L4;M0QXI6	Q9Y230	RUVBL2	RuvB-like 2
0	1	12	1110.64	0.0095242	78.964	38451000	8	AVLIAGQPGTGK	Q9Y230;B3KNL2;Q9Y230-2;M0R0Y3;B4DW30;X6R2L4;M0QXI6	Q9Y230	RUVBL2	RuvB-like 2
1	0	17	1946.02	5.0947e-05	109.1	8660700	1	EVVHTVSLHEIDVINSR	Q9Y230;B3KNL2;Q9Y230-2;M0R0Y3	Q9Y230	RUVBL2	RuvB-like 2
0	1	12	1515.72	5.0162e-10	196.7	6911300	2	EYQDAFLFNELK	Q9Y230;B3KNL2;Q9Y230-2	Q9Y230	RUVBL2	RuvB-like 2
0	1	11	1319.62	2.6437e-05	154.15	8169400	4	FVQCPDGELQK	Q9Y230;B3KNL2;Q9Y230-2;M0R0Y3	Q9Y230	RUVBL2	RuvB-like 2
1	0	11	1154.59	0.0010078	110.08	13903000	2	GLGLDDALEPR	Q9Y230;B4DW30;X6R2L4;M0R0Z0	Q9Y230	RUVBL2	RuvB-like 2
1	1	11	1258.65	0.0035822	88.155	5213800	3	GTEVQVDDIKR	Q9Y230;B3KNL2;Q9Y230-2	Q9Y230	RUVBL2	RuvB-like 2
1	0	17	1867.94	0.010234	58.98	11717000	2	GTSYQSPHGIPIDLLDR	Q9Y230;B3KNL2;Q9Y230-2;M0R0Y3	Q9Y230	RUVBL2	RuvB-like 2
0	1	12	1349.74	0.0040912	89.46	15611000	1	LLIVSTTPYSEK	Q9Y230;B3KNL2;Q9Y230-2;M0R0Y3	Q9Y230	RUVBL2	RuvB-like 2
1	0	13	1315.67	0.0002146	119.21	9885800	4	QASQGMVGQLAAR	Q9Y230;B4DW30;X6R2L4	Q9Y230	RUVBL2	RuvB-like 2
1	0	9	1035.53	0.010173	84.817	12881000	3	TEALTQAFR	Q9Y230;B3KNL2;Q9Y230-2;M0R0Y3;B4DW30;X6R2L4;M0QXI6	Q9Y230	RUVBL2	RuvB-like 2
0	1	16	1682.85	5.2889e-17	195.97	15847000	6	TQGFLALFSGDTGEIK	Q9Y230;B3KNL2;Q9Y230-2;M0R0Y3	Q9Y230	RUVBL2	RuvB-like 2
0	1	13	1500.7	0.0093419	93.649	1610300	1	TTEMETIYDLGTK	Q9Y230;B3KNL2;Q9Y230-2;M0R0Y3;B4DW30;X6R2L4	Q9Y230	RUVBL2	RuvB-like 2
0	1	11	1157.63	0.0047909	90.434	3592000	3	VQAGDVITIDK	Q9Y230;B3KNL2;Q9Y230-2;M0R0Y3;B4DW30	Q9Y230	RUVBL2	RuvB-like 2
1	0	10	1227.61	4.8587e-05	166.97	31800000	5	VYSLFLDESR	Q9Y230;B3KNL2;Q9Y230-2	Q9Y230	RUVBL2	RuvB-like 2
1	0	14	1577.86	0.0017904	95.755	2386400	1	YAIQLITAASLVCR	Q9Y230;B3KNL2;Q9Y230-2	Q9Y230	RUVBL2	RuvB-like 2
1	0	17	2029.97	0.00045192	90.498	5357300	3	CEYPAACNALETLLIHR	P54886-2;P54886	P54886-2	ALDH18A1	Delta-1-pyrroline-5-carboxylate synthase;Glutamate 5-kinase;Gamma-glutamyl phosphate reductase
1	0	9	1028.56	0.0016675	113.93	26217000	2	EAVQLVNTR	P54886-2;P54886	P54886-2	ALDH18A1	Delta-1-pyrroline-5-carboxylate synthase;Glutamate 5-kinase;Gamma-glutamyl phosphate reductase
1	0	10	1127.6	0.030956	66.19	1487700	1	EMAIPVLEAR	P54886-2;P54886	P54886-2	ALDH18A1	Delta-1-pyrroline-5-carboxylate synthase;Glutamate 5-kinase;Gamma-glutamyl phosphate reductase
0	1	13	1474.73	2.2367e-05	140.01	17321000	3	FASYLTFSPSEVK	P54886-2;P54886	P54886-2	ALDH18A1	Delta-1-pyrroline-5-carboxylate synthase;Glutamate 5-kinase;Gamma-glutamyl phosphate reductase
1	0	10	1046.48	0.00038037	123.86	8118100	2	GDECGLALGR	P54886-2;P54886	P54886-2	ALDH18A1	Delta-1-pyrroline-5-carboxylate synthase;Glutamate 5-kinase;Gamma-glutamyl phosphate reductase
0	2	16	1740.84	0.00075153	85.976	29871000	2	GKDHVVSDFSEHGSLK	P54886-2;P54886	P54886-2	ALDH18A1	Delta-1-pyrroline-5-carboxylate synthase;Glutamate 5-kinase;Gamma-glutamyl phosphate reductase
0	1	12	1183.68	1.6088e-05	145.14	39880000	4	GPVGLEGLLTTK	P54886-2;P54886	P54886-2	ALDH18A1	Delta-1-pyrroline-5-carboxylate synthase;Glutamate 5-kinase;Gamma-glutamyl phosphate reductase
0	1	16	1771.04	5.127e-08	134.02	24870000	4	ILHLLTQEALSIHGVK	P54886-2;P54886	P54886-2	ALDH18A1	Delta-1-pyrroline-5-carboxylate synthase;Glutamate 5-kinase;Gamma-glutamyl phosphate reductase
0	1	7	724.485	0.025551	94.669	5412800	2	LAAPLLK	P54886-2;P54886	P54886-2	ALDH18A1	Delta-1-pyrroline-5-carboxylate synthase;Glutamate 5-kinase;Gamma-glutamyl phosphate reductase
1	0	16	1739.95	2.7716e-26	220.25	6203700	1	LASIVEQVSVLQNQGR	P54886-2;P54886	P54886-2	ALDH18A1	Delta-1-pyrroline-5-carboxylate synthase;Glutamate 5-kinase;Gamma-glutamyl phosphate reductase
1	0	8	801.471	0.0016008	149.82	479460000	5	LGSAVVTR	P54886-2;P54886	P54886-2	ALDH18A1	Delta-1-pyrroline-5-carboxylate synthase;Glutamate 5-kinase;Gamma-glutamyl phosphate reductase
0	1	18	2028.02	1.2895e-29	215.51	14792000	7	LIDIFYPGDQQSVTFGTK	P54886-2;P54886	P54886-2	ALDH18A1	Delta-1-pyrroline-5-carboxylate synthase;Glutamate 5-kinase;Gamma-glutamyl phosphate reductase
1	0	9	955.581	6.0694e-06	194.94	25697000	5	LNSLAIGLR	P54886-2;P54886	P54886-2	ALDH18A1	Delta-1-pyrroline-5-carboxylate synthase;Glutamate 5-kinase;Gamma-glutamyl phosphate reductase
2	0	12	1449.84	0.0024712	96.23	8672500	1	LRHEILLSQSVR	P54886-2;P54886	P54886-2	ALDH18A1	Delta-1-pyrroline-5-carboxylate synthase;Glutamate 5-kinase;Gamma-glutamyl phosphate reductase
1	0	8	969.568	0.0038108	123.98	18594000	4	MIDLIIPR	P54886-2;P54886	P54886-2	ALDH18A1	Delta-1-pyrroline-5-carboxylate synthase;Glutamate 5-kinase;Gamma-glutamyl phosphate reductase
1	0	10	1186.6	0.0004822	120.06	3199900	2	MLATLEPEQR	P54886-2;P54886	P54886-2	ALDH18A1	Delta-1-pyrroline-5-carboxylate synthase;Glutamate 5-kinase;Gamma-glutamyl phosphate reductase
1	0	11	1278.7	3.2552e-06	175.74	10314000	1	NLNGTLHELLR	P54886-2;P54886	P54886-2	ALDH18A1	Delta-1-pyrroline-5-carboxylate synthase;Glutamate 5-kinase;Gamma-glutamyl phosphate reductase
1	0	12	1217.6	1.1522e-06	159.66	16290000	3	QIAASSQDSVGR	P54886-2;P54886	P54886-2	ALDH18A1	Delta-1-pyrroline-5-carboxylate synthase;Glutamate 5-kinase;Gamma-glutamyl phosphate reductase
1	0	14	1615.87	0.01555	68.044	867520	2	SWSNIPFITVPLSR	P54886-2;P54886	P54886-2	ALDH18A1	Delta-1-pyrroline-5-carboxylate synthase;Glutamate 5-kinase;Gamma-glutamyl phosphate reductase
1	0	12	1460.77	2.2503e-06	152	3531300	3	TPLFDQIIDMLR	P54886-2;P54886	P54886-2	ALDH18A1	Delta-1-pyrroline-5-carboxylate synthase;Glutamate 5-kinase;Gamma-glutamyl phosphate reductase
1	1	23	2464.21	1.3636e-14	171.39	21474000	6	VGTFFSEVKPAGPTVEQQGEMAR	P54886-2;P54886	P54886-2	ALDH18A1	Delta-1-pyrroline-5-carboxylate synthase;Glutamate 5-kinase;Gamma-glutamyl phosphate reductase
0	1	13	1352.73	0.00042658	102.33	19811000	2	VSGHVITDIVEGK	P54886-2;P54886	P54886-2	ALDH18A1	Delta-1-pyrroline-5-carboxylate synthase;Glutamate 5-kinase;Gamma-glutamyl phosphate reductase
1	0	11	1378.74	0.025858	53.237	2749900	1	YLHENLPIPQR	P54886-2;P54886	P54886-2	ALDH18A1	Delta-1-pyrroline-5-carboxylate synthase;Glutamate 5-kinase;Gamma-glutamyl phosphate reductase
1	0	12	1285.69	0.016282	77.597	841000	2	AGTVVLDDVELR	Q53HJ4;B2R7C5;A0A0S2Z4T1;P25205;Q8NHX6;A0A0S2Z492	Q53HJ4	MCM3;HCC5	DNA helicase;DNA replication licensing factor MCM3
1	0	12	1312.75	1.9715e-06	153.95	2105500	2	AILCLLLGGVER	Q53HJ4;B2R7C5;A0A0S2Z4T1;P25205;Q8NHX6;A0A0S2Z492;P25205-2;B4DUQ9;J3KQ69;B4DS46	Q53HJ4	MCM3;HCC5	DNA helicase;DNA replication licensing factor MCM3
1	0	9	1054.61	0.00042842	133.99	13159000	3	LIVNVNDLR	Q53HJ4;B2R7C5;A0A0S2Z4T1;P25205;Q8NHX6;A0A0S2Z492;P25205-2	Q53HJ4	MCM3;HCC5	DNA helicase;DNA replication licensing factor MCM3
1	0	14	1662.87	6.5615e-10	168.93	5264500	4	LLNNAFEELVAFQR	Q53HJ4;B2R7C5;A0A0S2Z4T1;P25205;Q8NHX6;A0A0S2Z492;P25205-2;B4DUQ9;J3KQ69	Q53HJ4	MCM3;HCC5	DNA helicase;DNA replication licensing factor MCM3
1	0	8	931.549	0.0036345	124.98	21700000	6	VALLDVFR	Q53HJ4;B2R7C5;A0A0S2Z4T1;P25205;P25205-2;B4DUQ9;J3KQ69;B4DS46	Q53HJ4	MCM3	DNA helicase;DNA replication licensing factor MCM3
1	0	8	920.508	0.011158	97.635	6508400	1	VQVVGTYR	Q53HJ4;B2R7C5;A0A0S2Z4T1;P25205;Q8NHX6;A0A0S2Z492;P25205-2;B4DUQ9;J3KQ69;B4DS46	Q53HJ4	MCM3;HCC5	DNA helicase;DNA replication licensing factor MCM3
0	1	8	907.484	0.0036345	124.98	25867000	7	AFAMIIDK	Q15366-6;Q15366-3;B4DLC0;Q15366-7;Q15366-4;Q15366;Q15366-2;B4DRD7;H3BRU6;F8VZX2;Q15366-8;Q15366-5;F8VXH9;F8W0G4;F8W1G6;H3BND9;Q53SS8;Q15365	Q53SS8	PCBP2;PCBP1	Poly(rC)-binding protein 2;Poly(rC)-binding protein 1
0	1	16	1671.89	2.1608e-10	162.26	46362000	4	AITIAGVPQSVTECVK	Q53SS8;Q15365	Q53SS8	PCBP1	Poly(rC)-binding protein 1
1	0	20	2088.97	2.2008e-40	242.8	28991000	13	ESTGAQVQVAGDMLPNSTER	Q15366-6;Q15366-3;B4DLC0;Q15366-7;Q15366-4;Q15366;Q15366-2;B4DRD7;H3BRU6;F8VZX2;Q15366-8;Q15366-5;F8VXH9;F8W0G4;Q5MJP6;E9PFP8;P57721-5;P57721-4;P57721;J3QT27;P57721-2;P57721-3;Q53SS8;Q15365	Q53SS8	PCBP2;PCBP3;PCBP1	Poly(rC)-binding protein 2;Poly(rC)-binding protein 3;Poly(rC)-binding protein 1
1	0	29	3200.59	1.4912e-07	108.57	3402900	2	GYWASLDASTQTTHELTIPNNLIGCIIGR	Q53SS8;Q15365	Q53SS8	PCBP1	Poly(rC)-binding protein 1
1	0	11	1085.55	0.0022037	99.732	32870000	3	IANPVEGSSGR	Q53SS8;Q15365	Q53SS8	PCBP1	Poly(rC)-binding protein 1
0	1	13	1387.81	3.2171e-18	219.74	84463000	7	IITLTGPTNAIFK	Q53SS8;Q15365	Q53SS8	PCBP1	Poly(rC)-binding protein 1
1	0	11	1287.59	2.952e-08	196.02	98455000	8	INISEGNCPER	Q15366-6;Q15366-3;B4DLC0;Q15366-7;Q15366-4;Q15366;Q15366-2;B4DRD7;H3BRU6;F8VZX2;Q15366-8;Q15366-5;F8VXH9;F8W0G4;F8W1G6;Q5MJP6;E9PFP8;P57721-5;P57721-4;P57721;J3QT27;P57721-2;P57721-3;F8VTZ0;Q53SS8;Q15365	Q53SS8	PCBP2;PCBP3;PCBP1	Poly(rC)-binding protein 2;Poly(rC)-binding protein 3;Poly(rC)-binding protein 1
2	0	23	2488.22	0.00046614	73.688	4151000	2	LEEDINSSMTNSTAASRPPVTLR	Q53SS8;Q15365	Q53SS8	PCBP1	Poly(rC)-binding protein 1
0	1	14	1441.8	1.501e-07	156.2	103430000	6	LVVPATQCGSLIGK	Q53SS8;Q15365	Q53SS8	PCBP1	Poly(rC)-binding protein 1
1	0	9	1013.53	0.0011577	118.03	27792000	3	QGANINEIR	Q53SS8;Q15365	Q53SS8	PCBP1	Poly(rC)-binding protein 1
1	0	17	1958.99	0.00034101	93.909	3541700	3	QICLVMLETLSQSPQGR	Q53SS8;Q15365	Q53SS8	PCBP1	Poly(rC)-binding protein 1
1	0	23	2474.18	0.0023866	59.614	1304200	1	VMTIPYQPMPASSPVICAGGQDR	Q53SS8;Q15365	Q53SS8	PCBP1	Poly(rC)-binding protein 1
0	1	11	1219.64	0.00037103	118.76	9122400	4	DAYQVILDGVK	G3V1C3;Q9BZZ5-3;Q9BZZ5-2;Q9BZZ5;B4DDR3;Q9BZZ5-6;E9PQK6	G3V1C3	API5	Apoptosis inhibitor 5
1	0	13	1470.75	7.4786e-10	178.68	19911000	3	ELPQFATGENLPR	G3V1C3;Q9BZZ5-3;Q9BZZ5-2;Q9BZZ5;B4DDR3;Q9BZZ5-6;Q9BZZ5-5;Q9BZZ5-1	G3V1C3	API5	Apoptosis inhibitor 5
0	1	11	1288.68	5.1022e-05	139.32	10511000	4	EVEELILTESK	G3V1C3;Q9BZZ5-3;Q9BZZ5-2;Q9BZZ5;Q9BZZ5-6;Q9BZZ5-5;Q9BZZ5-1;H0YER7	G3V1C3	API5	Apoptosis inhibitor 5
1	0	7	847.492	0.025731	94.407	8535600	3	GLQVYIR	G3V1C3;Q9BZZ5-3;Q9BZZ5-2;Q9BZZ5;B4DDR3;Q9BZZ5-6;Q9BZZ5-5;Q9BZZ5-1;H0YER7	G3V1C3	API5	Apoptosis inhibitor 5
1	0	18	1902.02	9.4914e-39	246.49	10078000	4	GTLGGLFSQILQGEDIVR	G3V1C3;Q9BZZ5-3;Q9BZZ5-2;Q9BZZ5;Q9BZZ5-6;Q9BZZ5-5;Q9BZZ5-1	G3V1C3	API5	Apoptosis inhibitor 5
0	1	10	1140.69	0.0010328	112.85	6498300	2	ITNNINVLIK	G3V1C3;Q9BZZ5-3;Q9BZZ5-2;Q9BZZ5;B4DDR3;Q9BZZ5-6;Q9BZZ5-5;Q9BZZ5-1;H0YER7	G3V1C3	API5	Apoptosis inhibitor 5
0	2	9	1031.6	0.038359	59.908	419280	1	KLPDFLTAK	G3V1C3;Q9BZZ5-3;Q9BZZ5-2;Q9BZZ5;B4DDR3;Q9BZZ5-6;Q9BZZ5-5;Q9BZZ5-1;H0YER7	G3V1C3	API5	Apoptosis inhibitor 5
0	1	8	886.528	0.0069315	122.74	1848500	3	LAAQFIPK	G3V1C3;Q9BZZ5-3;Q9BZZ5-2;Q9BZZ5;B4DDR3;Q9BZZ5-6;E9PQK6	G3V1C3	API5	Apoptosis inhibitor 5
1	0	18	2259.11	1.4424e-05	114.56	7345300	2	LQFSYVECLLYSFHQLGR	G3V1C3;Q9BZZ5-3;Q9BZZ5-2;Q9BZZ5;B4DDR3;Q9BZZ5-6;Q9BZZ5-5;Q9BZZ5-1;H0YER7	G3V1C3	API5	Apoptosis inhibitor 5
0	1	16	1742.86	4.2392e-70	316.54	12786000	5	NYGILADATEQVGQHK	G3V1C3;Q9BZZ5-3;Q9BZZ5-2;Q9BZZ5;B4DDR3;E9PQK6	G3V1C3	API5	Apoptosis inhibitor 5
1	0	8	1005.51	0.0028522	129.42	17522000	4	PTVEELYR	G3V1C3;Q9BZZ5-3;Q9BZZ5-2;Q9BZZ5;B4DDR3;Q9BZZ5-5;E9PQK6	G3V1C3	API5	Apoptosis inhibitor 5
0	1	19	2178.16	0.01339	60.938	192600	1	ELFVQSEIFPLETPAFAIK	P49915	P49915	GMPS	GMP synthase [glutamine-hydrolyzing]
0	1	13	1258.65	0.051935	53.491	460720	1	SGNIVAGIANESK	P49915;B4DUT7;Q53F90;P49915-2	P49915	GMPS	GMP synthase [glutamine-hydrolyzing]
1	0	14	1663.82	0.04183	56.527	602380	1	DLAYCVSQLPLTER	B3KY03;B3KMS0;Q15021	B3KY03	NCAPD2	Condensin complex subunit 1
1	0	13	1392.81	0.015026	87.863	2209700	0	EAITHLLGVALTR	B3KY03;B3KMS0;Q15021;E7EN77;Q6ZV00;B4E0B7;A0PJ76	B3KY03	NCAPD2	Condensin complex subunit 1
1	0	15	1824.93	0.025402	51.073	403200	1	FPNLVDPWTPHLYAR	B3KY03;B3KMS0;Q15021;B4E0B7	B3KY03	NCAPD2	Condensin complex subunit 1
1	0	12	1323.68	2.4202e-07	166.11	3944000	3	GFAAFLTELAER	B3KY03;B3KMS0;Q15021;E7EN77;Q6ZV00;B4E0B7;A0PJ76	B3KY03	NCAPD2	Condensin complex subunit 1
0	1	12	1312.81	0.0025856	96.067	4827500	2	QTLAAFVPLLLK	B3KY03;B3KMS0;Q15021;E7EN77;Q6ZV00;B4E0B7	B3KY03	NCAPD2	Condensin complex subunit 1
0	1	16	1718.92	1.4925e-31	239.19	6119400	3	SGGVNQYVVQEVLSIK	B3KY03;B3KMS0;Q15021;E7EN77;Q6ZV00;A0PJ76;F5H431;F5GZK7	B3KY03	NCAPD2	Condensin complex subunit 1
1	0	17	1995.97	8.6256e-53	292.44	147360000	19	ATENDIYNFFSPLNPVR	G8JLB6;P31943;E9PCY7;H0YB39;H0YBG7;Q68DG4;H0YBD7;B4DP51;A0A024R7T3;P52597;B4DKS8	G8JLB6	HNRNPH1;DKFZp686A15170;HNRPF;HNRNPF	Heterogeneous nuclear ribonucleoprotein H;Heterogeneous nuclear ribonucleoprotein H, N-terminally processed;Heterogeneous nuclear ribonucleoprotein F;Heterogeneous nuclear ribonucleoprotein F, N-terminally processed
1	0	13	1600.64	3.9821e-18	217.2	64941000	5	DLNYCFSGMSDHR	G8JLB6;P31943;E9PCY7;H0YB39;H0YBG7;Q68DG4;H0YBD7;P55795;B4DFK9;B4DP00	G8JLB6	HNRNPH1;DKFZp686A15170;HNRNPH2	Heterogeneous nuclear ribonucleoprotein H;Heterogeneous nuclear ribonucleoprotein H, N-terminally processed;Heterogeneous nuclear ribonucleoprotein H2
1	1	19	2105.98	0.016564	83.758	11342000	1	EGRPSGEAFVELESEDEVK	G8JLB6;P31943;E9PCY7;D6RIT2;D6RIU0;D6RBM0;E7EQJ0;D6RAM1;D6R9T0;D6RFM3;E7EN40;D6RDU3;D6RJ04;D6RIH9;D6RDL0	G8JLB6	HNRNPH1	Heterogeneous nuclear ribonucleoprotein H;Heterogeneous nuclear ribonucleoprotein H, N-terminally processed
1	0	13	1503.68	0.0017471	97.69	61074000	5	GLPWSCSADEVQR	G8JLB6;P31943;E9PCY7;D6RIT2;D6RIU0;D6RBM0;E7EQJ0;D6RAM1;D6R9T0;D6RFM3;E7EN40;D6RDU3;D6RJ04;D6RIH9;D6RDL0;E5RGV0;D6R9D3;D6RF17	G8JLB6	HNRNPH1	Heterogeneous nuclear ribonucleoprotein H;Heterogeneous nuclear ribonucleoprotein H, N-terminally processed
1	0	16	1683.76	8.5021e-52	284.53	223060000	15	HTGPNSPDTANDGFVR	G8JLB6;P31943;E9PCY7;D6RIT2;D6RIU0;D6RBM0;E7EQJ0;D6RAM1;D6R9T0;D6RFM3;D6RDU3;D6RJ04;D6RIH9;E5RGV0;E5RGH4;H0YAQ2;P55795	G8JLB6	HNRNPH1;HNRNPH2	Heterogeneous nuclear ribonucleoprotein H;Heterogeneous nuclear ribonucleoprotein H, N-terminally processed;Heterogeneous nuclear ribonucleoprotein H2
0	1	13	1322.65	0.014872	76.24	855750	1	MLGTEGGEGFVVK	G8JLB6;P31943;E9PCY7;D6RIT2;D6RIU0;D6RBM0;E7EQJ0;D6RAM1;D6R9T0;D6RFM3;E7EN40;D6RDU3;D6RJ04;D6RIH9;D6RDL0;E5RGV0;D6R9D3;D6RF17;E5RJ94	G8JLB6	HNRNPH1	Heterogeneous nuclear ribonucleoprotein H;Heterogeneous nuclear ribonucleoprotein H, N-terminally processed
0	1	14	1453.69	0.0048103	88.163	1407200	2	MMLGTEGGEGFVVK	G8JLB6;P31943;E9PCY7;D6RIT2;D6RIU0;D6RBM0;E7EQJ0;D6RAM1;D6R9T0;D6RFM3;E7EN40;D6RDU3;D6RJ04;D6RIH9;D6RDL0;E5RGV0;D6R9D3;D6RF17;E5RJ94	G8JLB6	HNRNPH1	Heterogeneous nuclear ribonucleoprotein H;Heterogeneous nuclear ribonucleoprotein H, N-terminally processed
0	1	16	1763.81	7.4595e-21	200.81	5531900	1	PSGEAFVELESEDEVK	G8JLB6;P31943;E9PCY7;D6RIT2;D6RIU0;D6RBM0;E7EQJ0;D6RAM1;D6R9T0;D6RFM3;E7EN40;D6RDU3;D6RJ04;D6RIH9;D6RDL0	G8JLB6	HNRNPH1	Heterogeneous nuclear ribonucleoprotein H;Heterogeneous nuclear ribonucleoprotein H, N-terminally processed
0	1	17	1840.88	9.3118e-61	297.73	195640000	12	STGEAFVQFASQEIAEK	G8JLB6;P31943;E9PCY7;D6RIU0;D6RBM0;E7EN40;H0YB39;E5RGV0;E5RGH4;P55795;B4DFK9	G8JLB6	HNRNPH1;HNRNPH2	Heterogeneous nuclear ribonucleoprotein H;Heterogeneous nuclear ribonucleoprotein H, N-terminally processed;Heterogeneous nuclear ribonucleoprotein H2
1	0	10	1091.57	0.0010821	112.36	297000000	14	VHIEIGPDGR	G8JLB6;P31943;E9PCY7;H0YB39;H0YBG7;Q68DG4;H0YBD7;B4DP51;P55795;B4DFK9;B4DP00;A0A024R7T3;P52597;B4DKS8	G8JLB6	HNRNPH1;DKFZp686A15170;HNRNPH2;HNRPF;HNRNPF	Heterogeneous nuclear ribonucleoprotein H;Heterogeneous nuclear ribonucleoprotein H, N-terminally processed;Heterogeneous nuclear ribonucleoprotein H2;Heterogeneous nuclear ribonucleoprotein F;Heterogeneous nuclear ribonucleoprotein F, N-terminally processed
1	0	19	2096.88	7.0765e-06	118.21	83981000	4	YGDGGSTFQSTTGHCVHMR	G8JLB6;P31943;E9PCY7;D6RIT2;H0YB39;H0YBG7;Q68DG4;H0YBD7;B4DP51	G8JLB6	HNRNPH1;DKFZp686A15170	Heterogeneous nuclear ribonucleoprotein H;Heterogeneous nuclear ribonucleoprotein H, N-terminally processed
1	0	20	2141.02	3.9911e-08	144.25	62030000	5	YVELFLNSTAGASGGAYEHR	G8JLB6;P31943;H0YB39	G8JLB6	HNRNPH1	Heterogeneous nuclear ribonucleoprotein H;Heterogeneous nuclear ribonucleoprotein H, N-terminally processed
0	1	8	907.484	0.0036345	124.98	25867000	7	AFAMIIDK	Q15366-6;Q15366-3;B4DLC0;Q15366-7;Q15366-4;Q15366;Q15366-2;B4DRD7;H3BRU6;F8VZX2;Q15366-8;Q15366-5;F8VXH9;F8W0G4;F8W1G6;H3BND9;Q53SS8;Q15365	Q53SS8	PCBP2;PCBP1	Poly(rC)-binding protein 2;Poly(rC)-binding protein 1
2	1	31	3350.68	1.2962e-07	103.75	2100400	1	AFAMIIDKLEEDISSSMTNSTAASRPPVTLR	Q15366-6;Q15366-3;B4DLC0;Q15366-7;Q15366-4;Q15366;Q15366-2;B4DRD7;H3BRU6;F8VZX2;Q15366-8;Q15366-5;F8VXH9;F8W0G4;F8W1G6;H3BND9	Q15366-6	PCBP2	Poly(rC)-binding protein 2
0	1	16	1711.95	6.9198e-08	140.77	72563000	11	AITIAGIPQSIIECVK	Q15366-6;Q15366-3;B4DLC0;Q15366-7;Q15366-4;Q15366;Q15366-2;B4DRD7;H3BRU6;F8VZX2;Q15366-8;Q15366-5;F8VXH9;F8VRH0	Q15366-6	PCBP2	Poly(rC)-binding protein 2
1	0	20	2088.97	2.2008e-40	242.8	28991000	13	ESTGAQVQVAGDMLPNSTER	Q15366-6;Q15366-3;B4DLC0;Q15366-7;Q15366-4;Q15366;Q15366-2;B4DRD7;H3BRU6;F8VZX2;Q15366-8;Q15366-5;F8VXH9;F8W0G4;Q5MJP6;E9PFP8;P57721-5;P57721-4;P57721;J3QT27;P57721-2;P57721-3;Q53SS8;Q15365	Q53SS8	PCBP2;PCBP3;PCBP1	Poly(rC)-binding protein 2;Poly(rC)-binding protein 3;Poly(rC)-binding protein 1
1	0	11	1157.57	0.00025023	124.6	36526000	4	IANPVEGSTDR	Q15366-6;Q15366-3;Q15366-7;Q15366-4;Q15366;Q15366-2;B4DRD7;H3BRU6;F8VZX2;Q15366-8;Q15366-5;F8VRH0;H3BSS4	Q15366-6	PCBP2	Poly(rC)-binding protein 2
0	1	13	1357.8	0.00032018	115.92	134890000	7	IITLAGPTNAIFK	Q15366-6;Q15366-3;B4DLC0;Q15366-7;Q15366-4;Q15366;Q15366-2;B4DRD7;H3BRU6;F8VZX2;Q15366-8;Q15366-5;F8VXH9;F8W0G4;F8W1G6	Q15366-6	PCBP2	Poly(rC)-binding protein 2
1	0	11	1287.59	2.952e-08	196.02	98455000	8	INISEGNCPER	Q15366-6;Q15366-3;B4DLC0;Q15366-7;Q15366-4;Q15366;Q15366-2;B4DRD7;H3BRU6;F8VZX2;Q15366-8;Q15366-5;F8VXH9;F8W0G4;F8W1G6;Q5MJP6;E9PFP8;P57721-5;P57721-4;P57721;J3QT27;P57721-2;P57721-3;F8VTZ0;Q53SS8;Q15365	Q53SS8	PCBP2;PCBP3;PCBP1	Poly(rC)-binding protein 2;Poly(rC)-binding protein 3;Poly(rC)-binding protein 1
2	0	23	2461.21	4.984e-05	115.91	8131200	3	LEEDISSSMTNSTAASRPPVTLR	Q15366-6;Q15366-3;B4DLC0;Q15366-7;Q15366-4;Q15366;Q15366-2;B4DRD7;H3BRU6;F8VZX2;Q15366-8;Q15366-5;F8VXH9;F8W0G4;F8W1G6;H3BND9	Q15366-6	PCBP2	Poly(rC)-binding protein 2
0	1	14	1427.78	2.4384e-07	150.05	110930000	6	LVVPASQCGSLIGK	Q15366-6;Q15366-3;B4DLC0;Q15366-7;Q15366-4;Q15366;Q15366-2;B4DRD7;H3BRU6;F8VZX2;Q15366-8;Q15366-5;F8VXH9;F8W0G4;F8W1G6;H3BND9;Q5MJP6;E9PFP8;P57721-5;P57721-4;P57721;J3QT27;P57721-2;P57721-3	Q15366-6	PCBP2;PCBP3	Poly(rC)-binding protein 2;Poly(rC)-binding protein 3
1	0	14	1416.7	0.00035258	111.81	13612000	3	PSSSPVIFAGGQDR	Q15366-6;Q15366-3;B4DLC0;Q15366;Q15366-2;H3BSS4	Q15366-6	PCBP2	Poly(rC)-binding protein 2
0	1	12	1399.72	0.0003565	117.03	13962000	3	QICVVMLESPPK	Q15366-6;Q15366-3;B4DLC0;Q15366-7;Q15366-4;Q5MJP6;E9PFP8;P57721-5;P57721-4;P57721;F8VRH0	Q15366-6	PCBP2;PCBP3	Poly(rC)-binding protein 2;Poly(rC)-binding protein 3
0	1	7	656.422	0.020021	103.28	10400000	1	AGLVIGK	A0A087WTP3;Q92945;M0QYH3;B4DV73;M0QXW7;M0R0I5;C9JSZ1;Q59FU3;B4E0X8;B4DWL1;E9PEB5;B4DT31;Q96AE4;Q96AE4-2;Q6PJY1	A0A087WTP3	KHSRP;FUBP1	Far upstream element-binding protein 2;Far upstream element-binding protein 1
1	0	14	1532.79	1.1728e-23	236.05	6549900	2	AINQQTGAFVEISR	A0A087WTP3;Q92945;M0R3J3	A0A087WTP3	KHSRP	Far upstream element-binding protein 2
1	0	11	1078.61	0.00018333	127.83	12429000	3	IGGGIDVPVPR	A0A087WTP3;Q92945;B4DV73;M0R0I5	A0A087WTP3	KHSRP	Far upstream element-binding protein 2
1	0	10	1183.69	0.051986	92.112	4594600	0	IINDLLQSLR	A0A087WTP3;Q92945	A0A087WTP3	KHSRP	Far upstream element-binding protein 2
1	1	18	2041.06	0.0025469	77.746	6550400	1	MILIQDGSQNTNVDKPLR	A0A087WTP3;Q92945;M0QYH3;B4DV73;M0R0I5	A0A087WTP3	KHSRP	Far upstream element-binding protein 2
1	0	12	1225.69	0.0017506	99.732	5611600	2	VPDGMVGLIIGR	A0A087WTP3;Q92945;M0QYH3;M0QXW7	A0A087WTP3	KHSRP	Far upstream element-binding protein 2
1	0	13	1353.69	0.00052488	111.81	4093800	2	VQISPDSGGLPER	A0A087WTP3;Q92945;M0QYH3;B4DV73;M0QXW7	A0A087WTP3	KHSRP	Far upstream element-binding protein 2
0	1	13	1651.79	0.0040041	85.45	274500	1	DFTDIQQDFLPWK	E7ESY4;Q13330-2;Q13330-3;Q13330;Q59FW1;H0Y4T7;A0A024R6P5	E7ESY4	MTA1	Metastasis-associated protein MTA1
0	1	12	1245.68	0.0024141	96.82	472370	1	DISSTLIALADK	E7ESY4;Q13330-2;Q13330-3;Q13330;H7C3F3	E7ESY4	MTA1	Metastasis-associated protein MTA1
1	0	10	1187.67	0.00072269	115.91	12983000	3	QIDQFLVVAR	A0A024R534;O94776;O94776-2;Q86TR6;Q53RX8;D6W5A2;E7ESY4;Q13330-2;Q13330-3;Q13330;E9PCS8;Q59FW1;H0Y4T7;E7EQY4;E7EV10;A0A024R6P5;Q9BTC8-2;Q9BTC8	E7ESY4	MTA2;tmp_locus_6;MTA3;MTA1	Metastasis-associated protein MTA2;Metastasis-associated protein MTA1;Metastasis-associated protein MTA3
1	0	18	2122	5.2484e-11	152.32	1848700	2	VGDYVYFENSSSNPYLIR	E7ESY4;Q13330-2;Q13330-3;Q13330;E9PCS8;E7EQY4;E7EV10;Q9BTC8-2;Q9BTC8;H0YIT0;Q53SC0;E9PF88	E7ESY4	MTA1;MTA3;tmp_locus_6	Metastasis-associated protein MTA1;Metastasis-associated protein MTA3
1	0	8	949.539	0.008912	102.77	391190	1	LPLAFAYR	O14578;O14578-4;H7BYJ3;O14578-3	O14578	CIT	Citron Rho-interacting kinase
1	0	14	1380.7	0.045845	54.768	710470	1	NPLDAGAAEPIASR	O14578;O14578-4;O14578-2	O14578	CIT	Citron Rho-interacting kinase
1	0	15	1484.74	0.008703	64.798	2029200	1	VASSPAPPEGPSHPR	O14578;O14578-4;H7BYJ3;O14578-3	O14578	CIT	Citron Rho-interacting kinase
1	1	18	1971	0.00013774	98.676	9688200	1	ACGLVASNLNLKPGECLR	P09382;F8WEI7	P09382	LGALS1	Galectin-1
1	0	12	1485.68	0.0338	49.448	7874000	1	DSNNLCLHFNPR	P09382	P09382	LGALS1	Galectin-1
0	1	16	1783.85	0.015254	100.69	1132900	0	LNLEAINYMAADGDFK	P09382	P09382	LGALS1	Galectin-1
0	1	8	876.507	0.0063311	112.41	15543000	3	SFVLNLGK	P09382	P09382	LGALS1	Galectin-1
1	1	19	2128.1	7.2519e-37	244.54	37566000	3	ASMGTLAFDEYGRPFLIIK	E7ENZ3;B4DYC8;B4DZT5;V9HW37;P48643;B4DXI1;D6RIZ7	E7ENZ3	CCT5;HEL-S-69	T-complex protein 1 subunit epsilon
0	1	16	1666.89	2.6434e-26	220.72	7001300	4	LGFAGLVQEISFGTTK	E7ENZ3;B4DYC8;B4DZT5;V9HW37;P48643;B4DE30;B7ZAR1;B4DDU6;B4DXI1;E9PCA1;B4DX08;Q9BU08;P48643-2;B4DZY9;Q96GI1	E7ENZ3	CCT5;HEL-S-69	T-complex protein 1 subunit epsilon
1	0	18	1959.98	2.8147e-50	275.31	13010000	2	QMAEIAVNAVLTVADMER	E7ENZ3;B4DYC8;B4DZT5;V9HW37;P48643;B4DE30;B7ZAR1;B4DDU6;B4DXI1;E9PCA1;B4DX08;Q9BU08;P48643-2;B4DZY9;Q96GI1	E7ENZ3	CCT5;HEL-S-69	T-complex protein 1 subunit epsilon
0	1	8	923.508	0.018093	68.787	490000	1	VAIEHLDK	E7ENZ3;B4DYC8;B4DZT5;V9HW37;P48643;B4DE30;B7ZAR1;B4DDU6;E9PCA1;B4DX08;Q9BU08;P48643-2	E7ENZ3	CCT5;HEL-S-69	T-complex protein 1 subunit epsilon
1	0	17	1737.94	4.512e-32	241.39	35709000	5	WVGGPEIELIAIATGGR	E7ENZ3;B4DYC8;B4DZT5;V9HW37;P48643;B4DE30;B7ZAR1;B4DDU6;B4DXI1;E9PCA1;B4DX08;Q9BU08;P48643-2;B4DZY9;Q96GI1	E7ENZ3	CCT5;HEL-S-69	T-complex protein 1 subunit epsilon
1	0	10	1295.61	0.053865	91.265	872620	0	ASLCNLYNWR	B0AZM4;A8K6F0;A0A024R9L1;O60306	B0AZM4	AQR	Intron-binding protein aquarius
0	1	29	3285.6	3.357e-08	116.45	1423300	2	GSTLPDVTEVSTFFPFHEYFANAPQPIFK	B0AZM4;A8K6F0;A0A024R9L1;O60306	B0AZM4	AQR	Intron-binding protein aquarius
1	0	14	1757.98	0.0001873	109.83	1918100	1	LNLQFLTLHDYLLR	B0AZM4;A8K6F0;A0A024R9L1;O60306;H0YH15	B0AZM4	AQR	Intron-binding protein aquarius
2	1	10	1283.76	0.052881	72.34	2398400	0	RIELLEEVKR	B0AZM4;A8K6F0;A0A024R9L1;O60306	B0AZM4	AQR	Intron-binding protein aquarius
1	0	19	2243.13	0.00053162	82.349	4224300	2	TDVAVQIISNIYHNFPEQR	B0AZM4;A8K6F0;A0A024R9L1;O60306	B0AZM4	AQR	Intron-binding protein aquarius
1	0	13	1507.75	0.0002141	119.25	2827900	2	AAMIWIVGEYAER	A0A087X253;H0UID4;H0UID3;A8K916;A8K0G3;P63010-3;P63010;P63010-2;B4DWG4;H0UID5;B4E261;A0A087WYD1;A0A087WU93;A0A087WZQ6;Q96EL6;K7EJ01;H7C034;Q10567-4;Q10567-3;Q10567-2;Q10567;C9J1E7	A0A087X253	AP2B1;AP1B1	AP complex subunit beta;AP-2 complex subunit beta;AP-1 complex subunit beta-1
0	1	14	1662.82	0.010387	64.224	992200	1	ALQHMTDFAIQFNK	A0A087X253;H0UID4;H0UID3;A8K916;A8K0G3;P63010-3;P63010;P63010-2;B4DWG4;Q68DI0;B4E261;Q96EL6;B4DIL5	A0A087X253	AP2B1;DKFZp781K0743	AP complex subunit beta;AP-2 complex subunit beta
0	1	17	2015.03	4.658e-06	117.48	1241300	1	APEVSQYIYQVYDSILK	A0A087X253;H0UID4;H0UID3;A8K916;A8K0G3;P63010-3;P63010;P63010-2;B4DWG4;H0UID5;Q68DI0;B4E261;Q96EL6;B4DIL5	A0A087X253	AP2B1;DKFZp781K0743	AP complex subunit beta;AP-2 complex subunit beta
0	1	12	1389.75	1.564e-05	145.29	5625900	3	CVSTLLDLIQTK	A0A087X253;H0UID4;H0UID3;A8K916;A8K0G3;P63010-3;P63010;P63010-2;B4DWG4;H0UID5;Q68DI0;B4E261;A0A087WYD1;A0A087WU93;A0A087WZQ6;K7EJ01;H7C034;Q10567-4;Q10567-3;Q10567-2;Q10567;C9J1E7	A0A087X253	AP2B1;DKFZp781K0743;AP1B1	AP complex subunit beta;AP-2 complex subunit beta;AP-1 complex subunit beta-1
2	0	11	1377.59	0.012497	77.124	961900	1	DDREAQSICER	A0A087X253;H0UID4;H0UID3;A8K916;A8K0G3;P63010-3;P63010;P63010-2;B4DWG4;H0UID5;Q68DI0;A0A087WYD1;A0A087WU93;A0A087WZQ6;Q10567-4;Q10567-3;Q10567-2;Q10567;C9J1E7	A0A087X253	AP2B1;DKFZp781K0743;AP1B1	AP complex subunit beta;AP-2 complex subunit beta;AP-1 complex subunit beta-1
0	1	12	1359.61	0.00074933	102.97	3399000	2	ECHLNADTVSSK	A0A087X253;H0UID4;H0UID3;A8K916;A8K0G3;P63010-3;P63010;P63010-2;B4DWG4;H0UID5;Q68DI0;B4E261;Q96EL6;B4DIL5	A0A087X253	AP2B1;DKFZp781K0743	AP complex subunit beta;AP-2 complex subunit beta
1	0	12	1441.67	0.019538	67.997	1387900	2	EYATEVDVDFVR	A0A087X253;H0UID4;H0UID3;A8K916;A8K0G3;P63010-3;P63010;P63010-2;B4DWG4;H0UID5;Q68DI0;B4E261;A0A087WYD1;A0A087WU93;A0A087WZQ6;K7EJ01;H7C034;Q10567-4;Q10567-3;Q10567-2;Q10567;C9J1E7	A0A087X253	AP2B1;DKFZp781K0743;AP1B1	AP complex subunit beta;AP-2 complex subunit beta;AP-1 complex subunit beta-1
0	1	7	858.521	0.021755	100.19	7894400	4	FLELLPK	A0A087X253;H0UID4;H0UID3;A8K916;A8K0G3;P63010-3;P63010;P63010-2;B4DWG4;H0UID5;Q68DI0;B4E261;A0A087WYD1;A0A087WU93;A0A087WZQ6	A0A087X253	AP2B1;DKFZp781K0743	AP complex subunit beta;AP-2 complex subunit beta
1	0	21	2264.28	0.00010478	107.41	3210600	5	LAPPLVTLLSGEPEVQYVALR	A0A087X253;H0UID4;H0UID3;A8K916;A8K0G3;P63010-3;P63010;P63010-2;B4DWG4;H0UID5;Q68DI0;B4E261;A0A087WYD1;A0A087WU93;A0A087WZQ6	A0A087X253	AP2B1;DKFZp781K0743	AP complex subunit beta;AP-2 complex subunit beta
0	1	15	1567.89	4.0436e-18	199.65	24372000	6	LASQANIAQVLAELK	A0A087X253;H0UID4;H0UID3;A8K916;A8K0G3;P63010-3;P63010;P63010-2;B4DWG4;H0UID5;Q68DI0;B4E261;A0A087WYD1;A0A087WU93;A0A087WZQ6;Q10567-4;Q10567-3;Q10567-2;Q10567;C9J1E7	A0A087X253	AP2B1;DKFZp781K0743;AP1B1	AP complex subunit beta;AP-2 complex subunit beta;AP-1 complex subunit beta-1
0	1	11	1276.68	0.00062823	114.76	11478000	2	LQNNNVYTIAK	A0A087X253;H0UID4;H0UID3;A8K916;A8K0G3;P63010-3;P63010;P63010-2;B4DWG4;H0UID5;Q68DI0;B4E261;Q96EL6;B4DIL5	A0A087X253	AP2B1;DKFZp781K0743	AP complex subunit beta;AP-2 complex subunit beta
0	1	14	1394.79	0.0066558	68.044	10592000	1	LSHANSAVVLSAVK	A0A087X253;H0UID4;H0UID3;A8K916;A8K0G3;P63010-3;P63010;P63010-2;B4DWG4;H0UID5;Q68DI0;A0A087WYD1;A0A087WU93;A0A087WZQ6;Q10567-4;Q10567-3;Q10567-2;Q10567;C9J1E7	A0A087X253	AP2B1;DKFZp781K0743;AP1B1	AP complex subunit beta;AP-2 complex subunit beta;AP-1 complex subunit beta-1
1	0	12	1397.8	0.0087535	106.29	1570700	0	LTNGIWILAELR	A0A087X253;H0UID4;H0UID3;A8K916;A8K0G3;P63010-3;P63010;P63010-2;B4DWG4;H0UID5;Q68DI0;B4E261;Q96EL6;B4DIL5	A0A087X253	AP2B1;DKFZp781K0743	AP complex subunit beta;AP-2 complex subunit beta
0	1	11	1389.74	0.0042886	92.239	4176500	1	LVYLYLMNYAK	A0A087X253;H0UID4;H0UID3;A8K916;A8K0G3;P63010-3;P63010;P63010-2;B4DWG4;H0UID5;Q68DI0;A0A087WYD1;A0A087WU93;A0A087WZQ6;B4DIL5;K7EN71;K7ERB2;K7EJX1;Q10567-4;Q10567-3;Q10567-2;Q10567;C9J1E7	A0A087X253	AP2B1;DKFZp781K0743;AP1B1	AP complex subunit beta;AP-2 complex subunit beta;AP-1 complex subunit beta-1
0	1	8	940.571	0.0023827	132.08	6673200	2	NINLIVQK	A0A087X253;H0UID4;H0UID3;A8K916;A8K0G3;P63010-3;P63010;P63010-2;B4DWG4;H0UID5;Q68DI0;B4E261;A0A087WYD1;A0A087WU93;A0A087WZQ6;Q10567-4;Q10567-3;Q10567-2;Q10567;C9J1E7	A0A087X253	AP2B1;DKFZp781K0743;AP1B1	AP complex subunit beta;AP-2 complex subunit beta;AP-1 complex subunit beta-1
0	1	13	1523.73	0.0096105	101.2	745470	0	NVEGQDMLYQSLK	A0A087X253;H0UID4;H0UID3;A8K916;A8K0G3;P63010-3;P63010;P63010-2;H0UID5;Q68DI0;B4E261;Q96EL6;B4DIL5;Q7Z3M8;B4DKH5;B4DS79;B4DG47;Q10567-4;Q10567-3;Q10567-2;Q10567	A0A087X253	AP2B1;DKFZp781K0743;DKFZp686A01208;AP1B1	AP complex subunit beta;AP-2 complex subunit beta;AP-1 complex subunit beta-1
0	1	8	991.549	0.017536	85.161	3522100	1	QVFLATWK	A0A087X253;H0UID4;H0UID3;A8K916;A8K0G3;P63010-3;P63010;P63010-2;B4DWG4;H0UID5;Q68DI0;B4E261;Q96EL6;B4DIL5	A0A087X253	AP2B1;DKFZp781K0743	AP complex subunit beta;AP-2 complex subunit beta
0	1	15	1636.8	0.034107	58.461	420040	1	SQPDMAIMAVNSFVK	A0A087X253;H0UID4;H0UID3;A8K916;A8K0G3;P63010-3;P63010;P63010-2;B4DWG4;H0UID5;Q68DI0;A0A087WYD1;A0A087WU93;A0A087WZQ6;K7EN71;K7ERB2	A0A087X253	AP2B1;DKFZp781K0743	AP complex subunit beta;AP-2 complex subunit beta
1	0	13	1500.87	0.0031665	89.992	879090	1	VNYVVQEAIVVIR	A0A087X253;H0UID4;H0UID3;A8K916;A8K0G3;P63010-3;P63010;P63010-2;B4DWG4;H0UID5;Q68DI0;B4E261;A0A087WYD1;A0A087WU93;A0A087WZQ6;Q96EL6;K7EJ01	A0A087X253	AP2B1;DKFZp781K0743	AP complex subunit beta;AP-2 complex subunit beta
0	1	22	2356.02	8.776e-05	114.78	1607900	2	AAAPAPEEEMDECEQALAAEPK	Q53YD7;P26641;P26641-2;Q2F840	Q53YD7	EEF1G	Elongation factor 1-gamma
1	0	13	1540.73	2.2402e-14	205.8	66726000	7	AAGTLYTYPENWR	Q53YD7;P26641;B4DUK7;Q2F838;B4DSR4	Q53YD7	EEF1G	Elongation factor 1-gamma
0	2	10	1122.62	0.0004274	121.61	123930000	6	AKDPFAHLPK	Q53YD7;P26641;P26641-2;B4DUP0	Q53YD7	EEF1G	Elongation factor 1-gamma
1	0	13	1346.73	1.3788e-28	253.42	139440000	9	ALIAAQYSGAQVR	Q53YD7;P26641;P26641-2;B4DUK7;Q2F838;B4DSR4	Q53YD7	EEF1G	Elongation factor 1-gamma
1	0	11	1460.64	4.6619e-06	172.8	19619000	5	DGWSLWYSEYR	Q53YD7;P26641;P26641-2;B4DUP0	Q53YD7	EEF1G	Elongation factor 1-gamma
0	1	8	923.486	0.016564	85.161	5075900	3	DPFAHLPK	Q53YD7;P26641;P26641-2;B4DUP0	Q53YD7	EEF1G	Elongation factor 1-gamma
0	1	14	1683.77	1.2383e-29	257.95	93646000	9	EYFSWEGAFQHVGK	Q53YD7;P26641;P26641-2;B4DUP0	Q53YD7	EEF1G	Elongation factor 1-gamma
1	0	21	2549.18	0.00010925	104.45	8079800	7	FPEELTQTFMSCNLITGMFQR	Q53YD7;P26641;P26641-2;B4DUP0	Q53YD7	EEF1G	Elongation factor 1-gamma
1	0	22	2686.23	1.585e-10	157.01	5473800	3	GQELAFPLSPDWQVDYESYTWR	Q53YD7;P26641;P26641-2;B4DUP0	Q53YD7	EEF1G	Elongation factor 1-gamma
0	1	10	1117.67	0.00013094	151.83	110630000	13	ILGLLDAYLK	Q53YD7;P26641;P26641-2;B4DUP0;B4DUK7	Q53YD7	EEF1G	Elongation factor 1-gamma
0	2	23	2484.11	0.0030887	61.345	1030800	1	KAAAPAPEEEMDECEQALAAEPK	Q53YD7;P26641;P26641-2;Q2F840	Q53YD7	EEF1G	Elongation factor 1-gamma
1	1	14	1571.82	0.00048027	114.21	69541000	6	KLDPGSEETQTLVR	Q53YD7;P26641;P26641-2;B4DUP0	Q53YD7	EEF1G	Elongation factor 1-gamma
1	0	13	1443.72	0.002623	92.939	20309000	3	LDPGSEETQTLVR	Q53YD7;P26641;P26641-2;B4DUP0	Q53YD7	EEF1G	Elongation factor 1-gamma
1	0	8	946.462	0.016793	86.136	8302900	2	QAFPNTNR	Q53YD7;P26641;P26641-2	Q53YD7	EEF1G	Elongation factor 1-gamma
1	0	8	974.519	0.03973	69.812	38115000	2	QVLEPSFR	Q53YD7;P26641;P26641-2	Q53YD7	EEF1G	Elongation factor 1-gamma
0	1	9	1084.54	0.007656	90.15	6525400	4	STFVLDEFK	Q53YD7;P26641;P26641-2;B4DUP0	Q53YD7	EEF1G	Elongation factor 1-gamma
1	1	10	1240.65	0.00046586	154.84	150270000	8	STFVLDEFKR	Q53YD7;P26641;P26641-2;B4DUP0	Q53YD7	EEF1G	Elongation factor 1-gamma
1	0	7	820.444	0.057468	69.825	3288900	1	TFLVGER	Q53YD7;P26641;P26641-2;B4DUP0	Q53YD7	EEF1G	Elongation factor 1-gamma
1	0	15	1706.86	0.012209	61.03	108390000	6	VLSAPPHFHFGQTNR	Q53YD7;P26641;P26641-2;B4DUK7;Q2F838;B4DSR4	Q53YD7	EEF1G	Elongation factor 1-gamma
1	0	28	3197.43	7.929e-11	142.32	4556600	7	VPAFEGDDGFCVFESNAIAYYVSNEELR	Q53YD7;P26641;P26641-2;B4DUK7;Q2F838;B4DSR4	Q53YD7	EEF1G	Elongation factor 1-gamma
1	0	12	1608.79	2.6467e-53	312.78	72745000	9	WFLTCINQPQFR	Q53YD7;P26641;P26641-2	Q53YD7	EEF1G	Elongation factor 1-gamma
0	1	20	2460.13	7.9372e-15	172.6	6378500	2	YSNEDTLSVALPYFWEHFDK	Q53YD7;P26641;P26641-2;B4DUP0	Q53YD7	EEF1G	Elongation factor 1-gamma
1	0	11	1165.68	0.023813	97.779	9459800	1	AVAQALEVIPR	B3KX11;P49368;B4DUR8;Q2TU64;Q59H77;P49368-2	B3KX11	CCT3	T-complex protein 1 subunit gamma
0	1	11	1253.7	0.015705	73.632	946230	1	ELGIWEPLAVK	B3KX11;P49368;B4DUR8;Q2TU64;Q59H77;P49368-2	B3KX11	CCT3	T-complex protein 1 subunit gamma
1	0	13	1427.74	0.024745	76.357	0	1	IPGGIIEDSCVLR	B3KX11;P49368;B4DUR8;Q2TU64;Q59H77;P49368-2;E9PRC8;Q5SZX6;E9PQ35	B3KX11	CCT3	T-complex protein 1 subunit gamma
0	1	11	1278.71	0.0014023	105.2	4511700	3	IVLLDSSLEYK	B3KX11;P49368;B4DUR8;Q2TU64;Q59H77;P49368-2;Q5SZX6	B3KX11	CCT3	T-complex protein 1 subunit gamma
1	0	20	2130.06	0.0015768	75.912	161330	1	MLLDPMGGIVMTNDGNAILR	B3KX11;P49368;B4DUR8;Q59H77;E9PRC8;Q5SZX6;Q5SZX9	B3KX11	CCT3	T-complex protein 1 subunit gamma
1	1	11	1279.73	0.0155	59.908	5772100	1	MMGHRPVLVLK	E9PRM9	E9PRM9	CCT3
1	1	15	1709.91	0.0045123	87.519	1686000	0	MMGHRPVLVLSQNTK	B3KX11;P49368;Q2TU64;P49368-2;E9PRC8;Q5SZX9;E9PM09	B3KX11	CCT3	T-complex protein 1 subunit gamma
0	1	26	2616.36	0.023372	39.645	810700	1	NVLLDPQLVPGGGASEMAVAHALTEK	B3KX11;P49368;B4DUR8;Q2TU64;Q59H77;P49368-2	B3KX11	CCT3	T-complex protein 1 subunit gamma
1	0	11	1184.71	0.001408	105.13	7580900	2	TAVETAVLLLR	B3KX11;P49368;B4DUR8;Q2TU64;Q59H77;P49368-2	B3KX11	CCT3	T-complex protein 1 subunit gamma
0	1	10	1164.56	0.0016027	107.21	2293300	2	GYGFVSFFNK	C9JTN7;F8W8I6;Q59G98;P31483-2;P31483;P31483-3;H7BY49	C9JTN7	TIA1	Nucleolysin TIA-1 isoform p40
1	0	13	1552.77	1.131e-05	145.1	8021200	5	QTFSPFGQIMEIR	C9JTN7;F8W8I6;Q59G98;P31483-2;P31483;A8K5C4;F8WE16;Q2TSD2;Q01085;Q01085-2;O15187;B4DHS3;Q59G49;Q49AS9	C9JTN7	TIA1;TIAL1	Nucleolysin TIA-1 isoform p40;Nucleolysin TIAR
1	0	9	1021.56	0.0073974	90.827	3645000	2	TLYVGNLSR	C9JTN7;F8W8I6;Q59G98;P31483-2;P31483;P31483-3;A8K5C4;B4E0E5;E7ETC0;E5RGV5;E5RG67;Q2TSD2;Q01085;Q01085-2	C9JTN7	TIA1;TIAL1	Nucleolysin TIA-1 isoform p40;Nucleolysin TIAR
0	1	11	1217.6	0.00022702	125.72	8246400	3	VNWATTPSSQK	C9JTN7;F8W8I6;Q59G98;P31483-2;P31483;P31483-3;A8K5C4;B4E0E5;E7ETC0;E5RGV5;H7BY49;E5RG67;A6NKZ9;Q2TSD2;Q01085;Q01085-2;O15187;E7ETJ9	C9JTN7	TIA1;TIAL1	Nucleolysin TIA-1 isoform p40;Nucleolysin TIAR
1	0	18	2015.93	0.0022857	79.326	757770	2	WDAENAIQQMGGQWLGGR	C9JTN7;F8W8I6;Q59G98;P31483-2;P31483;P31483-3	C9JTN7	TIA1	Nucleolysin TIA-1 isoform p40
0	1	12	1340.73	3.1866e-08	180.3	419560	1	DNALLAQLIQDK	Q59GC9;B7Z2V7;B7Z1V5;Q68CM6;P61764;P61764-2	Q59GC9	stxbp1;STXBP1	Syntaxin-binding protein 1
1	0	8	956.565	0.052704	65.719	459980	1	SQLLILDR	Q59GC9;B7Z2V7;B7Z1V5;Q68CM6;P61764;P61764-2;B7Z3F4	Q59GC9	stxbp1;STXBP1	Syntaxin-binding protein 1
1	0	13	1407.72	0.00044409	110.92	951550	1	AVGPSSTQLYMVR	X5D2F4;B3KWV6;Q7L576;A0A0G2JR96;A0A0G2JQT1;E7EW33;B7Z217;H7C229;B7Z3H2;B7Z4I3;E7EVJ5;Q96F07-2	X5D2F4	CYFIP1;CYFIP2	Cytoplasmic FMR1-interacting protein 1;Cytoplasmic FMR1-interacting protein 2
0	1	13	1454.77	3.0417e-05	136.3	4587400	5	DFVSEAYLLTLGK	B7Z4I3;E7EVJ5;Q96F07-2;B7Z8N7;Q96F07;A0A087WVE1;A0A087WTQ3;A0A087WWZ1	B7Z4I3	CYFIP2	Cytoplasmic FMR1-interacting protein 2
1	0	12	1313.61	0.0053505	74.698	4137900	3	EANHNVSAPYGR	X5D2F4;B3KWV6;Q7L576;Q7L576-2;A0A0G2JR96;A0A0G2JQT1;B3KWT5;E7EW33;B7Z217;H7C229;B7Z3H2;Q7L576-3;Q9NSN1;A0A087X0D6;Q14650;B7Z4I3;E7EVJ5;Q96F07-2;B7Z8N7;Q96F07	X5D2F4	CYFIP1;CYFIP2;DKFZp761H087	Cytoplasmic FMR1-interacting protein 1;Cytoplasmic FMR1-interacting protein 2
1	0	10	1241.61	0.053287	63.694	0	1	EFFLELTMGR	X5D2F4;B3KWV6;Q7L576;Q7L576-2;A0A0G2JR96;A0A0G2JQT1;E7EW33;B7Z217;H7C229;B7Z3H2;Q9NSN1;B7Z4I3;E7EVJ5;Q96F07-2;B7Z8N7;Q96F07	X5D2F4	CYFIP1;CYFIP2;DKFZp761H087	Cytoplasmic FMR1-interacting protein 1;Cytoplasmic FMR1-interacting protein 2
0	1	12	1438.75	1.2875e-07	173.76	4494300	3	FINMFAVLDELK	X5D2F4;B3KWV6;Q7L576;A0A0G2JR96;A0A0G2JQT1;B7Z4I3;E7EVJ5;Q96F07-2;B7Z8N7;Q96F07;A0A087WVE1;A0A087WTQ3;A0A087WWZ1	X5D2F4	CYFIP1;CYFIP2	Cytoplasmic FMR1-interacting protein 1;Cytoplasmic FMR1-interacting protein 2
1	0	8	872.49	0.030091	76.478	365350	1	GLQVLMGR	X5D2F4;B3KWV6;Q7L576;A0A0G2JR96;A0A0G2JQT1;E7EW33;B7Z217;H7C229;B7Z3H2;Q9NSN1;A0A0G2JQH3;A0A087WVZ5;B7Z4I3;E7EVJ5;Q96F07-2;B7Z8N7;Q96F07	X5D2F4	CYFIP1;CYFIP2;DKFZp761H087	Cytoplasmic FMR1-interacting protein 1;Cytoplasmic FMR1-interacting protein 2
1	0	14	1697.83	1.8635e-12	188.13	4583800	3	LCCGLSMFEVILTR	X5D2F4;B3KWV6;Q7L576;Q7L576-2;B3KWT5;E7EW33;B7Z217;H7C229;B7Z3H2;Q7L576-3;Q9NSN1;H0YL50;B7Z4I3;E7EVJ5;Q96F07-2;B7Z8N7;Q96F07	X5D2F4	CYFIP1;CYFIP2;DKFZp761H087	Cytoplasmic FMR1-interacting protein 1;Cytoplasmic FMR1-interacting protein 2
1	0	11	1166.68	0.0033876	95.477	7353800	2	LGTPQQIAIAR	X5D2F4;B3KWV6;Q7L576;Q7L576-2;B3KWT5;E7EW33;B7Z217;H7C229;B7Z3H2;Q7L576-3;Q9NSN1;H0YL50;B7Z4I3;E7EVJ5;Q96F07-2;B7Z8N7;Q96F07	X5D2F4	CYFIP1;CYFIP2;DKFZp761H087	Cytoplasmic FMR1-interacting protein 1;Cytoplasmic FMR1-interacting protein 2
1	0	17	1956.05	0.011777	66.068	898390	1	QLQVVPLFGDMQIELAR	X5D2F4;B3KWV6;Q7L576;A0A0G2JR96;A0A0G2JQT1;E7EW33;B7Z217;H7C229;B7Z3H2;B7Z4I3;E7EVJ5;Q96F07-2;B7Z8N7;Q96F07	X5D2F4	CYFIP1;CYFIP2	Cytoplasmic FMR1-interacting protein 1;Cytoplasmic FMR1-interacting protein 2
0	1	12	1361.79	1.6935e-06	155.88	2713300	2	SLLQGTILQYVK	X5D2F4;B3KWV6;Q7L576;Q7L576-2;B3KWT5;E7EW33;B7Z217;H7C229;B7Z3H2;Q7L576-3;Q9NSN1;B7Z4I3;E7EVJ5;Q96F07-2;B7Z8N7;Q96F07	X5D2F4	CYFIP1;CYFIP2;DKFZp761H087	Cytoplasmic FMR1-interacting protein 1;Cytoplasmic FMR1-interacting protein 2
1	0	12	1419.82	0.0068367	83.226	1787100	3	YAPLHLVPLIER	X5D2F4;B3KWV6;Q7L576;Q7L576-2;B3KWT5;E7EW33;B7Z217;H7C229;B7Z3H2;Q7L576-3;Q9NSN1;H0YL50;B7Z4I3;E7EVJ5;Q96F07-2;B7Z8N7;Q96F07	X5D2F4	CYFIP1;CYFIP2;DKFZp761H087	Cytoplasmic FMR1-interacting protein 1;Cytoplasmic FMR1-interacting protein 2
1	0	11	1139.67	0.036603	62.528	15167000	1	ATQALVLAPTR	A8K7F6;P60842;A8K088;J3KT12;P60842-2;Q59F68;J3QS69;J3KTB5;J3QL43;J3QR64;J3QLN6;J3KS25;J3QKZ9;B4E047;B4E102	A8K7F6	EIF4A1	Eukaryotic initiation factor 4A-I
0	1	14	1580.66	8.0856e-05	121.18	2258700	1	DFTVSAMHGDMDQK	A8K7F6;P60842;A8K088;J3KT12;P60842-2;B4DNH2;J3KSZ0;J3QL52	A8K7F6	EIF4A1	Eukaryotic initiation factor 4A-I
1	1	16	1865.8	0.0069801	71.933	1317900	2	DFTVSAMHGDMDQKER	A8K7F6;P60842;A8K088;J3KT12;P60842-2;B4DNH2;J3KSZ0;J3QL52	A8K7F6	EIF4A1	Eukaryotic initiation factor 4A-I
0	1	9	1168.58	5.2712e-09	221.68	68931000	7	DQIYDIFQK	A8K7F6;P60842;A8K088;J3KT12;P60842-2;Q59F68;J3QS69;B4DNH2;J3KTB5;J3KSZ0;J3QL43;J3KTN0;B4DKP9;J3QR64	A8K7F6	EIF4A1	Eukaryotic initiation factor 4A-I
0	1	8	956.529	0.0049953	117.4	74901000	3	ELAQQIQK	A8K7F6;P60842;A8K088;J3KT12;P60842-2;Q59F68;J3KTB5;J3QL43;J3QR64;J3QLN6;J3KS25;J3QKZ9;B4E047;J3KSN7;D3DSD6;Q14240;Q14240-2;E7EQG2	A8K7F6	EIF4A1;EIF4A2;hCG_1793424	Eukaryotic initiation factor 4A-I;Eukaryotic initiation factor 4A-II;Eukaryotic initiation factor 4A-II, N-terminally processed
2	0	7	933.485	0.018015	106.42	12837000	2	FMRDPIR	A8K7F6;P60842;A8K088;J3KT12;P60842-2;Q59F68;J3QS69;B4DNH2;J3KTB5;J3KSZ0;J3KTN0;B4DKP9;Q14240;Q14240-2;E7EQG2;Q9NZE6;B4DJX6	A8K7F6	EIF4A1;EIF4A2	Eukaryotic initiation factor 4A-I;Eukaryotic initiation factor 4A-II;Eukaryotic initiation factor 4A-II, N-terminally processed
0	2	12	1500.76	2.2137e-19	241.35	40137000	6	GFKDQIYDIFQK	A8K7F6;P60842;A8K088;J3KT12;P60842-2;Q59F68;J3QS69;B4DNH2;J3KTB5;J3KSZ0;J3QL43;J3KTN0;B4DKP9;J3QR64	A8K7F6	EIF4A1	Eukaryotic initiation factor 4A-I
1	0	19	2143.13	1.7213e-76	316.32	31124000	7	GIDVQQVSLVINYDLPTNR	A8K7F6;P60842;A8K088;B4DNH2;Q14240;Q14240-2;E7EQG2;Q9NZE6;Q96B07	A8K7F6	EIF4A1;EIF4A2	Eukaryotic initiation factor 4A-I;Eukaryotic initiation factor 4A-II;Eukaryotic initiation factor 4A-II, N-terminally processed
0	1	9	1046.51	0.007298	91.087	41128000	4	GIYAYGFEK	A0A024R8W0;P38919;I3L3H2;Q59GT8;Q5JWW0;J3QQP0;E9PBH4;F8WE11;C9JUF0;A8K7F6;P60842;A8K088;J3KT12;P60842-2;Q59F68;J3QS69;J3KTB5;J3QL43;J3QR64;J3QLN6;J3KS25;J3QKZ9;B4E047;J3KSN7;B4E102;J3KT04;J3KS93;E7EMV8;Q86WD0;Q14240;Q14240-2;E7EQG2	A8K7F6	DDX48;EIF4A3;DKFZp566L241;EIF4A1;EIF4A2	Eukaryotic initiation factor 4A-III;Eukaryotic initiation factor 4A-III, N-terminally processed;Eukaryotic initiation factor 4A-I;Eukaryotic initiation factor 4A-II;Eukaryotic initiation factor 4A-II, N-terminally processed
1	1	16	1826.93	6.1281e-51	287.42	227540000	10	GIYAYGFEKPSAIQQR	A0A024R8W0;P38919;I3L3H2;Q59GT8;Q5JWW0;J3QQP0;E9PBH4;F8WE11;A8K7F6;P60842;A8K088;J3KT12;P60842-2;Q59F68;J3QS69;J3KTB5;J3QL43;J3QR64;J3QLN6;J3KS25;J3QKZ9;B4E047;J3KSN7;B4E102;J3KT04;J3KS93;E7EMV8;Q86WD0;Q14240;Q14240-2;E7EQG2	A8K7F6	DDX48;EIF4A3;DKFZp566L241;EIF4A1;EIF4A2	Eukaryotic initiation factor 4A-III;Eukaryotic initiation factor 4A-III, N-terminally processed;Eukaryotic initiation factor 4A-I;Eukaryotic initiation factor 4A-II;Eukaryotic initiation factor 4A-II, N-terminally processed
1	1	13	1460.73	0.026486	80.96	2356300	1	GVAINMVTEEDKR	A8K7F6;P60842;A8K088;B4DNH2	A8K7F6	EIF4A1	Eukaryotic initiation factor 4A-I
0	1	14	1393.68	5.5694e-19	219.95	144910000	8	GYDVIAQAQSGTGK	A8K7F6;P60842;A8K088;J3KT12;P60842-2;Q59F68;J3QS69;J3KTB5;J3QL43;J3QR64;J3QLN6;J3KS25;J3QKZ9;B4E047;J3KSN7;B4E102;J3KT04;J3KS93;E7EMV8;Q86WD0;Q14240;Q14240-2;E7EQG2	A8K7F6	EIF4A1;EIF4A2	Eukaryotic initiation factor 4A-I;Eukaryotic initiation factor 4A-II;Eukaryotic initiation factor 4A-II, N-terminally processed
1	1	10	1186.66	6.7829e-06	182.92	78285000	10	KEELTLEGIR	A8K7F6;P60842;A8K088;J3KT12;P60842-2;Q59F68;J3QS69;B4DNH2;J3KTB5;J3KSZ0;J3KTN0;B4DKP9	A8K7F6	EIF4A1	Eukaryotic initiation factor 4A-I
1	2	14	1588.82	2.5463e-12	193.51	73873000	4	KGVAINMVTEEDKR	A8K7F6;P60842;A8K088;B4DNH2	A8K7F6	EIF4A1	Eukaryotic initiation factor 4A-I
0	2	8	1017.55	0.0018108	189.38	67292000	4	KVDWLTEK	A0A024R8W0;P38919;A8K7F6;P60842;A8K088;J3KT12;P60842-2;Q59F68;J3QS69;B4DNH2;J3KSZ0;J3QL43;J3KTN0;B4DKP9;J3QL52;Q14240;Q14240-2;E7EQG2;Q9NZE6;B4DJX6;Q96B07	A8K7F6	DDX48;EIF4A3;EIF4A1;EIF4A2	Eukaryotic initiation factor 4A-III;Eukaryotic initiation factor 4A-III, N-terminally processed;Eukaryotic initiation factor 4A-I;Eukaryotic initiation factor 4A-II;Eukaryotic initiation factor 4A-II, N-terminally processed
0	1	23	2458.3	2.7446e-49	247.58	11687000	6	LNSNTQVVLLSATMPSDVLEVTK	A8K7F6;P60842;A8K088;J3KT12;P60842-2;Q59F68;J3QS69;B4DNH2;J3KTB5;J3KSZ0;J3KTN0;B4DKP9	A8K7F6	EIF4A1	Eukaryotic initiation factor 4A-I
0	2	24	2586.39	6.6229e-06	122.3	14314000	3	LNSNTQVVLLSATMPSDVLEVTKK	A8K7F6;P60842;A8K088;J3KT12;P60842-2;Q59F68;J3QS69;B4DNH2;J3KTB5;J3KSZ0;J3KTN0;B4DKP9	A8K7F6	EIF4A1	Eukaryotic initiation factor 4A-I
1	0	15	1617.87	6.8536e-27	235.93	184470000	13	LQMEAPHIIVGTPGR	A8K7F6;P60842;A8K088;J3KT12;P60842-2;Q59F68;J3QS69;J3KTB5;J3KSZ0;J3QL43;J3QR64;J3QLN6;J3KS25;J3QKZ9;B4E047	A8K7F6	EIF4A1	Eukaryotic initiation factor 4A-I
1	0	13	1554.71	1.9037e-42	280.57	86544000	14	MFVLDEADEMLSR	A8K7F6;P60842;A8K088;J3KT12;P60842-2;Q59F68;J3QS69;B4DNH2;J3KTB5;J3KSZ0;J3QL43;J3KTN0;B4DKP9;J3QR64;J3QLN6;J3KS25;Q14240;Q14240-2;E7EQG2;Q9NZE6;B4DJX6	A8K7F6	EIF4A1;EIF4A2	Eukaryotic initiation factor 4A-I;Eukaryotic initiation factor 4A-II;Eukaryotic initiation factor 4A-II, N-terminally processed
1	0	8	1067.54	0.007865	106.68	40812000	2	QFYINVER	A8K7F6;P60842;A8K088;J3KT12;P60842-2;Q59F68;J3QS69;B4DNH2;J3KTB5;J3KSZ0;J3QL43;J3KTN0;B4DKP9;Q14240;Q14240-2;E7EQG2;Q9NZE6;B4DJX6;Q96B07	A8K7F6	EIF4A1;EIF4A2	Eukaryotic initiation factor 4A-I;Eukaryotic initiation factor 4A-II;Eukaryotic initiation factor 4A-II, N-terminally processed
1	1	12	1639.8	0.0017214	126.34	10344000	3	QFYINVEREEWK	A8K7F6;P60842;A8K088;J3KT12;P60842-2;Q59F68;J3QS69;B4DNH2;J3KTB5;J3KSZ0;J3QL43;J3KTN0;B4DKP9;Q14240;Q14240-2;E7EQG2;Q9NZE6;B4DJX6;Q96B07	A8K7F6	EIF4A1;EIF4A2	Eukaryotic initiation factor 4A-I;Eukaryotic initiation factor 4A-II;Eukaryotic initiation factor 4A-II, N-terminally processed
0	1	7	889.455	0.017898	107.9	22009000	2	VDWLTEK	A0A024R8W0;P38919;A8K7F6;P60842;A8K088;J3KT12;P60842-2;Q59F68;J3QS69;B4DNH2;J3KSZ0;J3QL43;J3KTN0;B4DKP9;J3QL52;Q14240;Q14240-2;E7EQG2;Q9NZE6;B4DJX6;Q96B07	A8K7F6	DDX48;EIF4A3;EIF4A1;EIF4A2	Eukaryotic initiation factor 4A-III;Eukaryotic initiation factor 4A-III, N-terminally processed;Eukaryotic initiation factor 4A-I;Eukaryotic initiation factor 4A-II;Eukaryotic initiation factor 4A-II, N-terminally processed
1	0	7	893.443	0.0098564	162.31	109260000	8	VFDMLNR	A8K7F6;P60842;A8K088;J3KT12;P60842-2;Q59F68;J3QS69;J3KTB5;J3KSZ0;J3QL43;J3QR64;J3QLN6;J3KS25;J3QKZ9;B4E047;Q14240;Q14240-2;E7EQG2;Q9NZE6;B4DJX6	A8K7F6	EIF4A1;EIF4A2	Eukaryotic initiation factor 4A-I;Eukaryotic initiation factor 4A-II;Eukaryotic initiation factor 4A-II, N-terminally processed
1	0	10	1113.68	8.7539e-09	204.34	217080000	13	VLITTDLLAR	A8K7F6;P60842;B4DNH2;Q14240;Q14240-2;E7EQG2;Q9NZE6;Q96B07	A8K7F6	EIF4A1;EIF4A2	Eukaryotic initiation factor 4A-I;Eukaryotic initiation factor 4A-II;Eukaryotic initiation factor 4A-II, N-terminally processed
1	0	23	2438.1	1.6116e-06	131.48	16106000	5	VVMALGDYMGASCHACIGGTNVR	A8K7F6;P60842;A8K088;J3KT12;P60842-2;Q59F68;J3QS69;J3KTB5;J3QL43;J3QR64;J3QLN6;J3KS25;J3QKZ9;B4E047	A8K7F6	EIF4A1	Eukaryotic initiation factor 4A-I
1	0	28	3201.57	0.016343	41.047	355750	1	ELQGLATNQPFFWEAQAPVSTVEQLDQR	Q9NVY6;A8K7A1;Q9Y6V7;Q69YV6;Q9Y6V7-2	Q9NVY6	DDX49;DKFZp564G1016	Probable ATP-dependent RNA helicase DDX49
1	0	17	1980	0.027733	56.746	258390	1	LSEDPYGIFCLVLTPTR	Q9NVY6;A8K7A1;Q9Y6V7;M0R1S3;M0QZC0;M0R0K1	Q9NVY6	DDX49	Probable ATP-dependent RNA helicase DDX49
0	1	11	1199.73	0.017803	71.03	303160	1	TAAFVLPILQK	Q9NVY6;A8K7A1;Q9Y6V7;M0R1S3;M0QZC0;M0R0K1	Q9NVY6	DDX49	Probable ATP-dependent RNA helicase DDX49
0	1	16	1643.87	1.1934e-08	148.41	2060300	1	LAGPQLVQMFIGDGAK	E9PM69;R4GNH3;A8K781;P17980;E9PMD8;E9PKD5;E9PN50	E9PM69	PSMC3	26S protease regulatory subunit 6A
0	1	13	1421.67	0.046128	55.899	1568800	1	PTEQYSDIGGLDK	E9PM69;R4GNH3;A8K781;P17980;E9PMD8;E9PN50	E9PM69	PSMC3	26S protease regulatory subunit 6A
0	1	15	1691.91	9.6819e-08	149.6	4517100	3	QTYFLPVIGLVDAEK	E9PM69;R4GNH3;A8K781;P17980;E9PMD8;E9PKD5;E9PLG2	E9PM69	PSMC3	26S protease regulatory subunit 6A
1	0	10	1123.66	0.0064566	88.134	9032300	3	VDILDPALLR	E9PM69;R4GNH3;A8K781;P17980;E9PKD5	E9PM69	PSMC3	26S protease regulatory subunit 6A
0	1	11	1184.61	0.00056264	115.57	5511500	1	IGEGTYGVVYK	E5RIU6;A0A087WZZ9;I6L9I5;A0A024QZP7;Q5H9N4;P06493;K7ELV5;E7ESI2;B4DDL9;A0A024QZJ8;A0A024RB10;A0A024RB77;A0A024R8R3;G3V5T9;P06493-2;P24941-2;P24941;Q00526;G3V317;B7Z3D6	E5RIU6	CDK1;CDC2;DKFZp686L20222;CDK3;CDK2	Cyclin-dependent kinase 1;Cyclin-dependent kinase 2;Cyclin-dependent kinase 3
1	0	8	861.471	0.0055054	115.49	52686000	3	LADFGLAR	E5RIU6;A0A087WZZ9;I6L9I5;A0A024QZP7;Q5H9N4;P06493;K7ELV5;E7ESI2;B4DDL9;A0A024RB10;A0A024RB77;A0A024R8R3;G3V5T9;P24941-2;P24941;Q00526;F8VXD2;B3KX76;F8VYH9;F8VZZ0;F8VTV8;F8VWX7;F8VZ51;K7EJ83;Q6LC83;Q8IWB3;H0YAZ9;Q9BWF9;A0A024RBB6;E7EUK8;B4DK59;B4DHU6;B4DER5;E5RGN0;Q96GA5;Q59G02;Q9BRL4;A0A087WZU2;F5H6Z0;B4DGP5;A0A024R996;A0A024R183;B4DK03;A0A024R980;A0A024RBH0;B7Z8T0;P11802-2;P11802;Q00534;Q96Q40-2…	B5BU53	CDK1;CDC2;DKFZp686L20222;CDK3;CDK2;CDK4;PCTK3;CDK16;CDK14;PCTK1;CDK17;PCTK2;CDK6;CDK15;CDK18;CDK9;CDK13;CDK12;CDC2L5;CDK5	Cyclin-dependent kinase 1;Cyclin-dependent kinase 2;Cyclin-dependent kinase 3;Cyclin-dependent kinase 4;Cyclin-dependent kinase 6;Cyclin-dependent kinase 15;Cyclin-dependent kinase 14;Cyclin-dependent kinase 18;Cyclin-dependent kinase 16;Cyclin-dependent kinase 17;Cyclin-dependent kinase 9;Cyclin-dependent kinase 12;Cyclin-dependent kinase 13;Cyclin-dependent-like kinase 5
1	0	10	1027.57	0.0011691	111.5	8050800	2	SPEVLLGSAR	E5RIU6;A0A087WZZ9;I6L9I5;A0A024QZP7;Q5H9N4;P06493;A0A024QZJ8;P06493-2	E5RIU6	CDK1;CDC2;DKFZp686L20222	Cyclin-dependent kinase 1
1	0	13	1649.69	0.048205	51.726	507410	1	AFYMEEGVPYCER	Q9NR12;Q9NR12-2	Q9NR12	PDLIM7	PDZ and LIM domain protein 7
1	0	10	951.477	0.018946	72.848	1019600	1	ASAPAADPPR	Q9NR12;D6RF83;D6RH06;Q9NR12-3;Q9NR12-5;Q9NR12-6;Q9NR12-4	Q9NR12	PDLIM7	PDZ and LIM domain protein 7
1	0	10	1146.6	0.0022236	101.39	19068000	5	DFNVPLSISR	Q9NR12;Q9NR12-2;D6RF83;D6RH06;Q9NR12-3;Q9NR12-5;Q9NR12-6;Q9NR12-4;H7BYK4;D6RAN1	Q9NR12	PDLIM7	PDZ and LIM domain protein 7
1	0	12	1453.65	0.0025487	96.229	2678000	1	GAIFCPPCYDVR	Q9NR12;Q9NR12-2	Q9NR12	PDLIM7	PDZ and LIM domain protein 7
1	0	13	1418.73	0.0057742	82.515	3443600	2	HSQPATPTPLQSR	Q9NR12;Q9NR12-2	Q9NR12	PDLIM7	PDZ and LIM domain protein 7
2	0	38	3952.9	0.013883	34.252	1390400	1	TEAPAPASSTPQEPWPGPTAPSPTSRPPWAVDPAFAER	Q9NR12;Q9NR12-2	Q9NR12	PDLIM7	PDZ and LIM domain protein 7
0	1	20	1740.88	0.046312	48.244	985760	1	TSIVQAAAGGVPGGGSNNGK	Q9NR12;Q9NR12-2	Q9NR12	PDLIM7	PDZ and LIM domain protein 7
0	1	11	1282.61	5.2068e-06	171.67	22200000	6	VLEEGGFFEEK	Q9NR12;Q9NR12-2	Q9NR12	PDLIM7	PDZ and LIM domain protein 7
1	0	12	1326.71	0.00024976	121.68	42083000	8	VVLEGPAPWGFR	Q9NR12;Q9NR12-2;D6RF83;D6RH06;Q9NR12-3;Q9NR12-5;Q9NR12-6;Q9NR12-4;H7BYK4;D6RAN1	Q9NR12	PDLIM7	PDZ and LIM domain protein 7
0	1	11	1225.63	0.0041141	98.898	17938000	1	YTFAPSVSLNK	Q9NR12;D6RF83;D6RH06;Q9NR12-3;Q9NR12-5;Q9NR12-6;Q9NR12-4;H7BYK4	Q9NR12	PDLIM7	PDZ and LIM domain protein 7
1	0	13	1248.63	0.00073208	107.65	3448300	1	AAAGGLAMLTSMR	Q9H3U1-2;Q9H3U1;Q9H3U1-3	Q9H3U1-2	UNC45A	Protein unc-45 homolog A
0	1	13	1485.61	1.7902e-14	203.74	4514700	1	AATECMCNLAMSK	Q9H3U1-2;Q9H3U1;Q9H3U1-3	Q9H3U1-2	UNC45A	Protein unc-45 homolog A
1	0	7	833.476	0.020796	101.6	5647500	1	ALFQLSR	Q9H3U1-2;Q9H3U1	Q9H3U1-2	UNC45A	Protein unc-45 homolog A
0	1	16	1624.9	8.2817e-21	199.33	14488000	2	ALIPLALEGTDVGQTK	Q9H3U1-2;Q9H3U1	Q9H3U1-2	UNC45A	Protein unc-45 homolog A
1	0	10	1069.62	0.00014561	141.88	27153000	2	ASQNLVVLAR	Q9H3U1-2;Q9H3U1;B4DLE6;B4DZL0	Q9H3U1-2	UNC45A	Protein unc-45 homolog A
0	1	9	999.596	0.00010564	175.93	19122000	4	DNALTLLIK	Q9H3U1-2;Q9H3U1	Q9H3U1-2	UNC45A	Protein unc-45 homolog A
0	1	16	1811.94	1.1993e-31	240.63	3408200	2	DPNNSLTLWVIDQGLK	Q9H3U1-2;Q9H3U1	Q9H3U1-2	UNC45A	Protein unc-45 homolog A
1	0	13	1343.72	0.0001041	128.21	6021000	1	GAVVVLNMVEASR	Q9H3U1-2;Q9H3U1;Q9H3U1-3	Q9H3U1-2	UNC45A	Protein unc-45 homolog A
0	1	7	938.453	0.0085111	133.81	8506000	1	LCENYIK	Q9H3U1-2;Q9H3U1	Q9H3U1-2	UNC45A	Protein unc-45 homolog A
1	0	10	1169.64	4.279e-05	168.85	22031000	2	LDQAVLDLQR	Q9H3U1-2;Q9H3U1;B4DLE6;B4DZL0	Q9H3U1-2	UNC45A	Protein unc-45 homolog A
0	2	13	1497.68	0.0065115	80.96	4245300	1	LEDYDKAETEASK	Q9H3U1-2;Q9H3U1;B4DZL0;B4DEA9	Q9H3U1-2	UNC45A	Protein unc-45 homolog A
0	1	15	1547.82	2.2421e-06	136.33	1639200	1	LLAAGVVSAMVCMVK	Q9H3U1-2;Q9H3U1	Q9H3U1-2	UNC45A	Protein unc-45 homolog A
1	0	15	1660.85	7.5679e-27	234.83	4636200	1	LLDMGETDLMLAALR	Q9H3U1-2;Q9H3U1;B4DLE6;B4DZL0	Q9H3U1-2	UNC45A	Protein unc-45 homolog A
1	0	15	1761.91	1.6996e-55	297.91	12551000	2	LLVLYSGEDDELLQR	Q9H3U1-2;Q9H3U1;Q9H3U1-3	Q9H3U1-2	UNC45A	Protein unc-45 homolog A
1	0	15	1691.82	2.6419e-12	181.75	4924700	1	LTITSNPEMTFPGER	Q9H3U1-2;Q9H3U1	Q9H3U1-2	UNC45A	Protein unc-45 homolog A
0	1	9	948.531	0.014677	80.916	4161700	1	MSASILLSK	Q9H3U1-2;Q9H3U1	Q9H3U1-2	UNC45A	Protein unc-45 homolog A
0	2	19	2140.15	9.6139e-05	110.74	6446000	1	SLKDPNNSLTLWVIDQGLK	Q9H3U1-2;Q9H3U1	Q9H3U1-2	UNC45A	Protein unc-45 homolog A
1	0	9	1013.56	0.0018279	112.71	5029100	1	SNGVQLLQR	Q9H3U1-2;Q9H3U1;B4DLE6;B4DZL0	Q9H3U1-2	UNC45A	Protein unc-45 homolog A
0	1	11	1178.57	6.7646e-05	133.42	14186000	2	SWFEGQGLAGK	Q9H3U1-2;Q9H3U1	Q9H3U1-2	UNC45A	Protein unc-45 homolog A
1	1	10	1117.61	0.0083669	93.561	4495800	0	TASSVEQLRK	Q9H3U1-2;B4DLE6	Q9H3U1-2	UNC45A	Protein unc-45 homolog A
1	0	11	1130.67	5.9405e-05	134.38	12934000	2	TVATLSILGTR	Q9H3U1-2;Q9H3U1;B4DLE6;B4DZL0	Q9H3U1-2	UNC45A	Protein unc-45 homolog A
1	0	12	1417.75	0.00018852	125.36	3144900	1	VFLALVEEVEDR	Q9H3U1-2;Q9H3U1	Q9H3U1-2	UNC45A	Protein unc-45 homolog A
1	0	7	861.471	0.018174	107.29	15374000	1	VFQEALR	Q9H3U1-2;Q9H3U1;B4DLE6;B4DZL0	Q9H3U1-2	UNC45A	Protein unc-45 homolog A
0	1	32	3650.7	0.012033	37.808	8054900	2	AIVDCGFEHPSEVQHECIPQAILGMDVLCQAK	A0A024RCM3;Q13838;Q13838-2;Q5STU3;F6WLT2;A0A0A0MT12;F6TRA5;Q59G92;F6S4E6;F6QYI9;A0A0G2JJL7;F6R6M7;K7EN69;Q7KYK3;K7ENP6;A0A0G2JHN7;K7EL56;K7EIL8;F6U6E2;F6S2B7;F6SXL5;B4DH55;O00148;B4DX78;O00148-2;A0A024R7H0;O00148-3;K7EPJ3	O00148	hCG_2005638;DDX39B;DDX39A;BAT1;DDX39	Spliceosome RNA helicase DDX39B;ATP-dependent RNA helicase DDX39A
1	0	20	2294.2	1.7824e-20	196.45	9438600	3	CMALAQLLVEQNFPAIAIHR	O00148;B4DX78;Q69YT6	O00148	DDX39A;DKFZp547B159	ATP-dependent RNA helicase DDX39A
1	1	10	1242.73	0.0015579	145.46	160740000	13	DFLLKPELLR	A0A024RCM3;Q13838;Q13838-2;Q5STU3;F6WLT2;A0A0A0MT12;F6TRA5;Q59G92;F6S4E6;F6QYI9;A0A0G2JJL7;F6R6M7;K7EN69;Q7KYK3;K7ENP6;A0A0G2JHN7;K7EL56;K7EIL8;F6U6E2;F6S2B7;F6SXL5;B4DH55;B4DF34;O00148;B4DX78;O00148-2;A0A024R7H0;O00148-3;K7EQN7;K7EPJ3	O00148	hCG_2005638;DDX39B;DDX39A;BAT1;DDX39	Spliceosome RNA helicase DDX39B;ATP-dependent RNA helicase DDX39A
1	0	7	905.461	0.012872	119.41	60358000	5	DVQEIFR	A0A024RCM3;Q13838;Q13838-2;Q5STU3;A0A0G2JJZ9;B4DP52;F6WLT2;A0A0A0MT12;F6TRA5;Q59G92;F6S4E6;F6UJC5;B4DIJ6;B4DIZ8;O00148;B4DX78;O00148-2;A0A024R7H0;O00148-3;K7EQN7	O00148	hCG_2005638;DDX39B;DDX39A;DDX39	Spliceosome RNA helicase DDX39B;ATP-dependent RNA helicase DDX39A
0	1	8	934.512	0.039087	70.256	23009000	4	ELAFQISK	A0A024RCM3;Q13838;Q13838-2;Q5STU3;A0A0G2JJZ9;F6WLT2;A0A0A0MT12;F6TRA5;Q59G92;F6S4E6;B4DIJ6;F6QYI9;A0A0G2JJL7;F6R6M7;K7EN69;Q7KYK3;O00148;B4DX78;O00148-2;A0A024R7H0;O00148-3;K7EQN7;K7EPJ3;A0A0D9SEM9	O00148	hCG_2005638;DDX39B;DDX39A;BAT1;DDX39	Spliceosome RNA helicase DDX39B;ATP-dependent RNA helicase DDX39A
0	1	15	1829.79	0.00021176	112.34	1426800	2	FMQDPMEVFVDDETK	O00148;B4DX78;O00148-2	O00148	DDX39A	ATP-dependent RNA helicase DDX39A
0	1	14	1478.73	8.1808e-45	294.52	81931000	8	GLAITFVSDENDAK	A0A024RCM3;Q13838;Q13838-2;A0A0G2JJZ9;B4DP52;H0Y400;O00148;B4DX78;Q69YT6	O00148	hCG_2005638;DDX39B;DDX39A;DKFZp547B159	Spliceosome RNA helicase DDX39B;ATP-dependent RNA helicase DDX39A
1	0	12	1295.63	6.0846e-07	163.45	98462000	13	GSYVSIHSSGFR	A0A024RCM3;Q13838;Q13838-2;Q5STU3;F6WLT2;A0A0A0MT12;F6TRA5;Q59G92;F6S4E6;F6QYI9;A0A0G2JJL7;F6R6M7;K7EN69;Q7KYK3;K7ENP6;A0A0G2JHN7;K7EL56;K7EIL8;F6U6E2;F6S2B7;F6SXL5;B4DH55;B4DF34;O00148;B4DX78;O00148-2;A0A024R7H0;O00148-3;K7EQN7;K7EPJ3	O00148	hCG_2005638;DDX39B;DDX39A;BAT1;DDX39	Spliceosome RNA helicase DDX39B;ATP-dependent RNA helicase DDX39A
0	1	9	1161.51	0.0024775	107.79	12607000	3	HFVLDECDK	O00148;B4DX78;O00148-2;A0A024R7H0;O00148-3;K7EQN7;K7EPJ3;A0A0D9SEM9	O00148	DDX39A;DDX39	ATP-dependent RNA helicase DDX39A
1	0	8	971.504	0.0035059	125.71	38651000	4	ILNDVQDR	A0A024RCM3;Q13838;Q13838-2;A0A0G2JJZ9;B4DP52;H0Y400;O00148;B4DX78;Q69YT6	O00148	hCG_2005638;DDX39B;DDX39A;DKFZp547B159	Spliceosome RNA helicase DDX39B;ATP-dependent RNA helicase DDX39A
1	0	10	1102.65	1.5204e-06	184.71	272670000	13	ILVATNLFGR	A0A024RCM3;Q13838;Q13838-2;Q5STU3;A0A0G2JJZ9;B4DP52;H0Y400;O00148;B4DX78;Q69YT6	O00148	hCG_2005638;DDX39B;DDX39A;DKFZp547B159	Spliceosome RNA helicase DDX39B;ATP-dependent RNA helicase DDX39A
1	1	13	1419.74	0.0039913	82.069	977130	1	KNCPHVVVGTPGR	O00148;B4DX78;O00148-2;A0A024R7H0;O00148-3;K7EQN7;K7EPJ3;A0A0D9SEM9	O00148	DDX39A;DDX39	ATP-dependent RNA helicase DDX39A
0	1	12	1461.8	9.9897e-12	199.8	151000000	9	LTLHGLQQYYVK	A0A024RCM3;Q13838;Q13838-2;Q5STU3;A0A0G2JJZ9;B4DP52;F6WLT2;F6UJC5;H0Y400;H0YCC6;O00148;B4DX78;O00148-2;Q69YT6	O00148	hCG_2005638;DDX39B;DDX39A;DKFZp547B159	Spliceosome RNA helicase DDX39B;ATP-dependent RNA helicase DDX39A
1	0	8	1034.49	0.0015623	152.06	26074000	8	MLEQLDMR	A0A024RCM3;Q13838;Q13838-2;Q5STU3;A0A0G2JJZ9;B4DP52;F6WLT2;A0A0A0MT12;F6TRA5;Q59G92;F6S4E6;F6UJC5;B4DIJ6;B4DIZ8;O00148;O00148-2;A0A024R7H0;O00148-3;K7EQN7;K7EPJ3	O00148	hCG_2005638;DDX39B;DDX39A;DDX39	Spliceosome RNA helicase DDX39B;ATP-dependent RNA helicase DDX39A
1	0	12	1291.65	3.9509e-05	136.93	59982000	13	NCPHVVVGTPGR	O00148;B4DX78;O00148-2;A0A024R7H0;O00148-3;K7EQN7;K7EPJ3;A0A0D9SEM9	O00148	DDX39A;DDX39	ATP-dependent RNA helicase DDX39A
2	0	8	1061.56	0.0077281	137.95	17547000	5	RDVQEIFR	A0A024RCM3;Q13838;Q13838-2;Q5STU3;A0A0G2JJZ9;B4DP52;F6WLT2;A0A0A0MT12;F6TRA5;Q59G92;F6S4E6;F6UJC5;B4DIJ6;B4DIZ8;O00148;B4DX78;O00148-2;A0A024R7H0;O00148-3;K7EQN7	O00148	hCG_2005638;DDX39B;DDX39A;DDX39	Spliceosome RNA helicase DDX39B;ATP-dependent RNA helicase DDX39A
1	0	19	2327.05	0.00073885	79.317	28140000	5	VNIVFNYDMPEDSDTYLHR	O00148;B4DX78;Q69YT6	O00148	DDX39A;DKFZp547B159	ATP-dependent RNA helicase DDX39A
0	1	11	1152.65	0.0002076	126.66	26296000	6	VSVFFGGLSIK	O00148;B4DX78;O00148-2;A0A024R7H0;O00148-3;K7EQN7;A0A0D9SEM9	O00148	DDX39A;DDX39	ATP-dependent RNA helicase DDX39A

## Sheet: Table S4 (Cytoplasmic)
N: R Count	N: K Count	N: Length	N: Mass	N: PEP	N: Score	N: Intensity	N: MS/MS Count	T: Sequence	T: Proteins	T: Leading razor protein	T: Gene names	T: Protein names
1	0	11	1260.61	1.3035e-17	219.92	191670000	4	CAGNEDIITLR	Q6FHF5;P12004;Q6FI35;B4DUA2	Q6FHF5	PCNA	Proliferating cell nuclear antigen
0	1	15	1583.8	2.5296e-05	136.57	251630000	6	DLSHIGDAVVISCAK	Q6FHF5;P12004;Q6FI35	Q6FHF5	PCNA	Proliferating cell nuclear antigen
0	1	13	1292.64	5.8974e-26	234.87	261780000	3	FSASGELGNGNIK	Q6FHF5;P12004;Q6FI35	Q6FHF5	PCNA	Proliferating cell nuclear antigen
0	1	8	883.459	0.0056424	110.12	7624700	2	IADMGHLK	Q6FHF5;P12004;Q6FI35	Q6FHF5	PCNA	Proliferating cell nuclear antigen
0	1	21	2464.19	3.4481e-17	190.79	37578000	5	LMDLDVEQLGIPEQEYSCVVK	Q6FHF5;P12004;Q6FI35	Q6FHF5	PCNA	Proliferating cell nuclear antigen
1	1	29	3290.63	0.0034947	63.893	21026000	1	LSQTSNVDKEEEAVTIEMNEPVQLTFALR	Q6FHF5;P12004;Q6FI35	Q6FHF5	PCNA	Proliferating cell nuclear antigen
0	1	8	856.538	0.0163	88.819	173730000	2	LVQGSILK	Q6FHF5;P12004;Q6FI35;B4DUA2;Q7Z6A3;Q7Z6A2;Q7Z6A1	Q6FHF5	PCNA	Proliferating cell nuclear antigen
1	0	8	893.407	0.0033491	119.21	255070000	6	MPSGEFAR	Q6FHF5;P12004	Q6FHF5	PCNA	Proliferating cell nuclear antigen
0	1	13	1364.68	1.1787e-59	286.53	70652000	4	NLAMGVNLTSMSK	Q6FHF5;P12004;Q6FI35;B4DUA2	Q6FHF5	PCNA	Proliferating cell nuclear antigen
1	0	8	973.414	0.01077	96.034	96044000	2	SEGFDTYR	Q6FHF5;P12004;Q6FI35;B4DUA2;Q7Z6A3;Q7Z6A2;Q7Z6A1	Q6FHF5	PCNA	Proliferating cell nuclear antigen
0	1	7	931.48	0.0046803	130.22	257610000	3	YLNFFTK	Q6FHF5;P12004;Q6FI35	Q6FHF5	PCNA	Proliferating cell nuclear antigen
1	0	15	1600.81	2.8653e-32	247.11	1985700000	19	AVLVDLEPGTMDSVR	P04350;B4DE77;B4DJ43;M0R278;M0QY85;M0R0X0;M0QY37;M0QX14;M0QZL7;A0A075B724;Q8IZ29;P68371;Q8N6N5;Q8IWP6;B3KML9;B4DNW1;Q3ZCM7	Q8IZ29	TUBB4A;TUBB8;TUBB2C;TUBB4B	Tubulin beta-4A chain;Tubulin beta-4B chain;Tubulin beta-8 chain
0	1	32	3310.53	3.0765e-07	113.04	1208100000	11	EAESCDCLQGFQLTHSLGGGTGSGMGTLLLSK	Q3ZCM7;A0A075B736;Q5SQY0	Q3ZCM7	TUBB8	Tubulin beta-8 chain
1	0	10	1129.59	6.0966e-07	166.86	2837600000	28	FPGQLNADLR	P04350;B4DE77;B4DJ43;M0R2D3;Q5JP53;Q5SU16;P07437;B7ZAF0;Q6LC01;B4DY90;Q5ST81;B7ZAK1;Q9BUU9;B4E052;B4DQN9;Q96B85;B4DXZ5;B4DMU8;Q1KSF8;Q8IZ29;P68371;Q8N6N5;Q8IWP6;B3KML9;Q96HX0;Q13509;Q9BV28;Q53G92;B2RBD5;A0A0B4J269;Q13509-2;Q3ZCR3;G3V2A3;Q13885;B2R6L0;A5D907;A5D906;A6NNZ2;Q3ZCM7;A0A075B736;Q5SQY0;Q9BUF5;B3KS31;B4DP54;K7ESM5;B4E386	Q8IZ29	TUBB4A;TUBB;XTP3TPATP1;TUBB2C;TUBB4B;TUBB3;TUBB2A;TUBB8;TUBB6	Tubulin beta-4A chain;Tubulin beta chain;Tubulin beta-4B chain;Tubulin beta-3 chain;Tubulin beta-2A chain;Tubulin beta-8 chain-like protein LOC260334;Tubulin beta-8 chain;Tubulin beta-6 chain
1	1	11	1257.68	0.00014411	136.49	257030000	11	FPGQLNADLRK	P04350;B4DE77;B4DJ43;M0R2D3;Q5JP53;Q5SU16;P07437;B7ZAF0;Q6LC01;B4DY90;Q5ST81;B7ZAK1;Q9BUU9;B4E052;B4DQN9;Q96B85;B4DXZ5;B4DMU8;Q1KSF8;Q8IZ29;P68371;Q8N6N5;Q8IWP6;B3KML9;Q96HX0;Q13509;Q9BV28;Q53G92;B2RBD5;A0A0B4J269;Q13509-2;Q3ZCR3;G3V2A3;Q13885;B2R6L0;A5D907;A5D906;A6NNZ2;Q3ZCM7;A0A075B736;Q5SQY0;Q9BUF5;B3KS31;B4DP54;K7ESM5;B4E386	Q8IZ29	TUBB4A;TUBB;XTP3TPATP1;TUBB2C;TUBB4B;TUBB3;TUBB2A;TUBB8;TUBB6	Tubulin beta-4A chain;Tubulin beta chain;Tubulin beta-4B chain;Tubulin beta-3 chain;Tubulin beta-2A chain;Tubulin beta-8 chain-like protein LOC260334;Tubulin beta-8 chain;Tubulin beta-6 chain
2	0	8	1076.53	0.031591	104.01	0	1	IREEYPDR	Q5JP53;Q5SU16;P07437;B7ZAF0;Q6LC01;B4DY90;Q5ST81;B7ZAK1;Q9BUU9;B4E052;B4DQN9;Q1KSF8;Q8IZ29;P68371;Q8N6N5;Q8IWP6;B3KML9;Q13885;B2R6L0;A5D907;A5D906;A6NNZ2;Q3ZCM7;A0A075B736;Q5SQY0	Q8IZ29	TUBB;XTP3TPATP1;TUBB2C;TUBB4B;TUBB2A;TUBB8	Tubulin beta chain;Tubulin beta-4B chain;Tubulin beta-2A chain;Tubulin beta-8 chain-like protein LOC260334;Tubulin beta-8 chain
0	2	33	3438.62	9.1384e-16	157.2	182850000	5	KEAESCDCLQGFQLTHSLGGGTGSGMGTLLLSK	Q3ZCM7;A0A075B736;Q5SQY0	Q3ZCM7	TUBB8	Tubulin beta-8 chain
1	1	11	1270.72	0.0061434	106.62	31382000	1	KLAVNMVPFPR	P04350;B4DE77;B4DJ43;B4DFH6;Q5JP53;Q5SU16;P07437;B7ZAF0;Q6LC01;B4DY90;Q5ST81;Q9BUU9;B4E052;B4DQN9;Q96B85;B4DXZ5;B4DMU8;Q1KSF8;Q8IZ29;P68371;Q8N6N5;Q8IWP6;B3KML9;Q96HX0;Q13509;Q9BV28;Q53G92;B2RBD5;A0A0B4J269;Q13509-2;Q3ZCR3;Q13885;B2R6L0;A6NNZ2;Q3ZCM7;A0A075B736;Q5SQY0;Q9BUF5;B3KS31;B4DP54;K7ESM5;B4E386	Q8IZ29	TUBB4A;TUBB;XTP3TPATP1;TUBB2C;TUBB4B;TUBB3;TUBB2A;TUBB8;TUBB6	Tubulin beta-4A chain;Tubulin beta chain;Tubulin beta-4B chain;Tubulin beta-3 chain;Tubulin beta-2A chain;Tubulin beta-8 chain-like protein LOC260334;Tubulin beta-8 chain;Tubulin beta-6 chain
1	0	10	1142.63	9.2193e-12	199.46	5643900000	45	LAVNMVPFPR	P04350;B4DE77;B4DJ43;B4DFH6;Q5JP53;Q5SU16;P07437;B7ZAF0;Q6LC01;B4DY90;Q5ST81;Q9BUU9;B4E052;B4DQN9;Q96B85;B4DXZ5;B4DMU8;Q1KSF8;Q8IZ29;P68371;Q8N6N5;Q8IWP6;B3KML9;Q96HX0;Q13509;Q9BV28;Q53G92;B2RBD5;A0A0B4J269;Q13509-2;Q3ZCR3;Q13885;B2R6L0;A6NNZ2;Q3ZCM7;A0A075B736;Q5SQY0;Q9BUF5;B3KS31;B4DP54;K7ESM5;B4E386	Q8IZ29	TUBB4A;TUBB;XTP3TPATP1;TUBB2C;TUBB4B;TUBB3;TUBB2A;TUBB8;TUBB6	Tubulin beta-4A chain;Tubulin beta chain;Tubulin beta-4B chain;Tubulin beta-3 chain;Tubulin beta-2A chain;Tubulin beta-8 chain-like protein LOC260334;Tubulin beta-8 chain;Tubulin beta-6 chain
1	0	14	1619.83	4.0635e-06	142.83	4852700000	44	LHFFMPGFAPLTSR	P04350;B4DE77;B4DJ43;B4DFH6;I0CMK4;Q5JP53;Q5SU16;P07437;B7ZAF0;Q6LC01;B4DY90;Q5ST81;B7ZAK1;Q9BUU9;B4E052;B4DQN9;Q96B85;B4DXZ5;B4DMU8;Q1KSF8;Q8IZ29;P68371;Q8N6N5;Q8IWP6;B3KML9;Q96HX0;Q13885;B2R6L0;A6NNZ2;Q3ZCM7;A0A075B736;Q5SQY0;Q9BUF5;B3KS31;B4DP54;K7ESM5;B4E386	Q8IZ29	TUBB4A;TUBB4Q;TUBB;XTP3TPATP1;TUBB2C;TUBB4B;TUBB2A;TUBB8;TUBB6	Tubulin beta-4A chain;Tubulin beta chain;Tubulin beta-4B chain;Tubulin beta-2A chain;Tubulin beta-8 chain-like protein LOC260334;Tubulin beta-8 chain;Tubulin beta-6 chain
1	0	9	1064.42	2.7749e-06	166.34	1076000000	25	NMMAACDPR	P04350;B4DE77;B4DJ43;B4DFH6;Q5JP53;Q5SU16;P07437;B7ZAF0;Q6LC01;B4DY90;Q5ST81;B7ZAK1;Q9BUU9;B4E052;B4DQN9;Q96B85;B4DXZ5;B4DMU8;Q1KSF8;Q8IZ29;P68371;Q8N6N5;Q8IWP6;B3KML9;Q96HX0;A4UCT2;Q13509;Q9BV28;Q53G92;B2RBD5;A0A0B4J269;Q13509-2;Q3ZCR3;Q13885;B2R6L0;A6NNZ2;Q3ZCM7;A0A075B736;Q5SQY0;Q9BUF5;B3KS31;B4DP54;K7ESM5;B4E386	Q8IZ29	TUBB4A;TUBB;XTP3TPATP1;TUBB2C;TUBB4B;TUBB3;TUBB2A;TUBB8;TUBB6	Tubulin beta-4A chain;Tubulin beta chain;Tubulin beta-4B chain;Tubulin beta-3 chain;Tubulin beta-2A chain;Tubulin beta-8 chain-like protein LOC260334;Tubulin beta-8 chain;Tubulin beta-6 chain
1	0	9	1027.51	0.00021141	143.03	315500000	40	TAVCDIPPR	P04350;B4DE77;B4DJ43;B4DFH6;Q5JP53;Q5SU16;P07437;B7ZAF0;Q6LC01;B4DY90;Q5ST81;B7ZAK1;Q9BUU9;B4E052;B4DQN9;Q96B85;B4DXZ5;B4DMU8;B4DMJ5;Q6P602;Q8IZ29;P68371;Q8N6N5;Q8IWP6;B3KML9;Q96HX0;A4UCT2;Q13885;B2R6L0;A6NNZ2;Q3ZCM7;A0A075B736;Q5SQY0	Q8IZ29	TUBB4A;TUBB;TUBB2C;TUBB4B;TUBB2A;TUBB8	Tubulin beta-4A chain;Tubulin beta chain;Tubulin beta-4B chain;Tubulin beta-2A chain;Tubulin beta-8 chain-like protein LOC260334;Tubulin beta-8 chain
0	1	14	1613.8	0.01245	83.633	1374000	1	AFYPEEISSMVLTK	A8K5I0;A0A0G2JIW1;Q59EJ3;P0DMV9;P0DMV8;B4DNT8;B4DWK5;B4DI39;Q9UQC1	A8K5I0	HEL-S-103;HSPA1B;HSPA1A;HSP70-1	Heat shock 70 kDa protein 1B;Heat shock 70 kDa protein 1A
1	0	14	1464.8	0.018759	61.167	12498000	1	AQIHDLVLVGGSTR	A8K5I0;A0A0G2JIW1;Q59EJ3;P0DMV9;P0DMV8;B4DNT8;B4DWK5;B4DI39;P0DMV8-2;B4DFN9;B4E1S9;B4DVU9;B4E388;V9GZ37;B3KTT5	A8K5I0	HEL-S-103;HSPA1B;HSPA1A	Heat shock 70 kDa protein 1B;Heat shock 70 kDa protein 1A
1	0	16	1674.72	0.010529	70.272	21013000	2	ATAGDTHLGGEDFDNR	Q53FC7;B3KSM6;B2R6X5;P17066;B4DHP5;P48741;A8K5I0;A0A0G2JIW1;Q59EJ3;P0DMV9;P0DMV8;B4DNT8;B4DWK5;B4DI39;P0DMV8-2;B4DFN9;B4E1S9;B4DVU9;B4E388;V9GZ37;B3KTT5;Q9UQC1;B4DNV4	A8K5I0	HSPA6;HSPA7;HEL-S-103;HSPA1B;HSPA1A;HSP70-1	Heat shock 70 kDa protein 6;Putative heat shock 70 kDa protein 7;Heat shock 70 kDa protein 1B;Heat shock 70 kDa protein 1A
1	0	12	1196.69	0.00059909	115.92	40609000	3	DAGVIAGLNVLR	A8K5I0;A0A0G2JIW1;Q59EJ3;P0DMV9;P0DMV8;B4DNT8;B4DWK5;B4DI39;P0DMV8-2;B4E1S9;B4DVU9;Q9UQC1	A8K5I0	HEL-S-103;HSPA1B;HSPA1A;HSP70-1	Heat shock 70 kDa protein 1B;Heat shock 70 kDa protein 1A
1	0	27	3000.49	0.036256	38.279	937040	1	EIAEAYLGYPVTNAVITVPAYFNDSQR	A8K5I0;A0A0G2JIW1;Q59EJ3;P0DMV9;P0DMV8;B4DNT8;B4DWK5;B4E1S9;Q9UQC1	A8K5I0	HEL-S-103;HSPA1B;HSPA1A;HSP70-1	Heat shock 70 kDa protein 1B;Heat shock 70 kDa protein 1A
0	1	31	3054.49	7.2709e-20	183.65	2152000	1	ELEQVCNPIISGLYQGAGGPGPGGFGAQGPK	A8K5I0;A0A0G2JIW1;Q59EJ3;P0DMV9;P0DMV8;B4DNT8;B4DWK5;B4DI39;P0DMV8-2;B4DFN9;B4E1S9;B4DVU9;B4E388;V9GZ37;B3KTT5;B4E1T6	A8K5I0	HEL-S-103;HSPA1B;HSPA1A	Heat shock 70 kDa protein 1B;Heat shock 70 kDa protein 1A
1	0	10	1314.59	1.0201e-05	150.15	6676300	2	FEELCSDLFR	Q53FC7;B3KSM6;B2R6X5;P17066;B4DHP5;P48741;A8K5I0;A0A0G2JIW1;Q59EJ3;P0DMV9;P0DMV8;B4DNT8;B4DWK5;B4DI39;P0DMV8-2;B4DFN9;B4E1S9;B4DVU9;B4E388;V9GZ37;B3KTT5;B4DNV4	A8K5I0	HSPA6;HSPA7;HEL-S-103;HSPA1B;HSPA1A	Heat shock 70 kDa protein 6;Putative heat shock 70 kDa protein 7;Heat shock 70 kDa protein 1B;Heat shock 70 kDa protein 1A
0	1	11	1221.57	0.037946	66.393	1037800	1	FGDPVVQSDMK	A8K5I0;A0A0G2JIW1;Q59EJ3;P0DMV9;P0DMV8;B4DNT8;P0DMV8-2;B4DFN9;B4E388;B4DNX1	A8K5I0	HEL-S-103;HSPA1B;HSPA1A	Heat shock 70 kDa protein 1B;Heat shock 70 kDa protein 1A
0	2	14	1679.84	2.1731e-05	135.04	26632000	3	HWPFQVINDGDKPK	A8K5I0;A0A0G2JIW1;Q59EJ3;P0DMV9;P0DMV8;B4DNT8;B4DWK5;B4DI39;Q9UQC1	A8K5I0	HEL-S-103;HSPA1B;HSPA1A;HSP70-1	Heat shock 70 kDa protein 1B;Heat shock 70 kDa protein 1A
1	0	16	1686.89	5.8652e-12	185.28	19102000	3	IINEPTAAAIAYGLDR	Q53FC7;B3KSM6;B2R6X5;P17066;B4DHP5;A8K5I0;A0A0G2JIW1;Q59EJ3;P0DMV9;P0DMV8;B4DNT8;B4DWK5;B4DI39;P0DMV8-2;B4DFN9;B4E1S9;B4DVU9;Q9UQC1	A8K5I0	HSPA6;HEL-S-103;HSPA1B;HSPA1A;HSP70-1	Heat shock 70 kDa protein 6;Heat shock 70 kDa protein 1B;Heat shock 70 kDa protein 1A
0	1	9	1080.56	8.5304e-06	162.64	245450000	9	LLQDFFNGK	Q53FC7;B3KSM6;B2R6X5;P17066;B4DHP5;V9HW22;P11142;E9PKE3;Q53GZ6;Q96IS6;B3KTV0;Q53HF2;P11142-2;E9PNE6;E9PN89;B4E1Q1;A8K7Q2;A0A024R6B5;P54652;B3KUS2	V9HW22	HSPA6;HEL-S-72p;HSPA8;HSPA2	Heat shock 70 kDa protein 6;Heat shock cognate 71 kDa protein;Heat shock-related 70 kDa protein 2
0	2	13	1564.82	0.027269	101.71	0	0	LLQDFFNGKELNK	Q53FC7;B3KSM6;B2R6X5;P17066;B4DHP5;V9HW22;P11142;E9PKE3;Q53GZ6;Q96IS6;B3KTV0;Q53HF2;P11142-2;E9PNE6;E9PN89;B4E1Q1;A8K7Q2;A0A024R6B5;P54652;B3KUS2	V9HW22	HSPA6;HEL-S-72p;HSPA8;HSPA2	Heat shock 70 kDa protein 6;Heat shock cognate 71 kDa protein;Heat shock-related 70 kDa protein 2
1	0	9	1108.57	0.0053741	99.815	4258200	1	LLQDFFNGR	A8K5I0;A0A0G2JIW1;Q59EJ3;P0DMV9;P0DMV8;B4DNT8;B4DWK5;B4DI39;P0DMV8-2;B4DFN9;B4E1S9;B4DVU9;B4E388;V9GZ37;B3KTT5;B4E1T6;B4DNX1	A8K5I0	HEL-S-103;HSPA1B;HSPA1A	Heat shock 70 kDa protein 1B;Heat shock 70 kDa protein 1A
0	1	10	1260.65	0.017891	62.633	20968000	2	LVNHFVEEFK	A8K5I0;A0A0G2JIW1;Q59EJ3;P0DMV9;P0DMV8;B4DNT8;B4DWK5;B4DI39;P0DMV8-2;B4DFN9;B4E1S9;B4DVU9;B4E388;V9GZ37;B3KTT5;B4DNV4	A8K5I0	HEL-S-103;HSPA1B;HSPA1A	Heat shock 70 kDa protein 1B;Heat shock 70 kDa protein 1A
0	1	11	1286.6	3.1106e-12	187.85	38549000	3	NALESYAFNMK	A8K5I0;A0A0G2JIW1;Q59EJ3;P0DMV9;P0DMV8;B4DNT8;B4DWK5;B4DI39;P0DMV8-2;B4DFN9;B4E1S9;B4DVU9;B4E388;V9GZ37;B3KTT5;B4E1T6;B4DNX1	A8K5I0	HEL-S-103;HSPA1B;HSPA1A	Heat shock 70 kDa protein 1B;Heat shock 70 kDa protein 1A
0	1	15	1657.84	1.3311e-32	252.12	35056000	3	NQVALNPQNTVFDAK	A8K5I0;A0A0G2JIW1;Q59EJ3;P0DMV9;P0DMV8;B4DNT8;P0DMV8-2;B4DFN9;B4E388;B4E1T6;B4DNX1	A8K5I0	HEL-S-103;HSPA1B;HSPA1A	Heat shock 70 kDa protein 1B;Heat shock 70 kDa protein 1A
1	0	24	2785.36	7.8723e-07	119.72	722570	1	QTQIFTTYSDNQPGVLIQVYEGER	A8K5I0;A0A0G2JIW1;Q59EJ3;P0DMV9;P0DMV8;B4DNT8;B4DWK5;B4DI39;P0DMV8-2;B4DFN9;B4E1S9;B4DVU9;B4E388;V9GZ37;B3KTT5;B4E1T6;B4DNX1	A8K5I0	HEL-S-103;HSPA1B;HSPA1A	Heat shock 70 kDa protein 1B;Heat shock 70 kDa protein 1A
0	1	23	2303.15	7.8106e-05	95.624	5855100	4	SINPDEAVAYGAAVQAAILMGDK	A8K5I0;A0A0G2JIW1;Q59EJ3;P0DMV9;P0DMV8;B4DNT8;B4DWK5;B4DI39;P0DMV8-2;B4DFN9;B4E1S9;B4DVU9;B4E388;V9GZ37;B3KTT5;B4E1T6;B4DNX1	A8K5I0	HEL-S-103;HSPA1B;HSPA1A	Heat shock 70 kDa protein 1B;Heat shock 70 kDa protein 1A
1	0	13	1486.69	8.2222e-20	208.51	302480000	7	TTPSYVAFTDTER	Q53FC7;B3KSM6;B2R6X5;P17066;P48741;V9HW22;P11142;E9PKE3;Q53GZ6;B3KTV0;Q53HF2;P11142-2;E9PNE6;B4DTX2;E9PLF4;E9PQQ4;E9PQK7;E9PK54;E9PPY6;E9PI65;A0A024R6B5;P54652;E9PN25;B3KUS2;A8K5I0;A0A0G2JIW1;Q59EJ3;P0DMV9;P0DMV8;B4DWK5;B4DI39;P0DMV8-2;B4DFN9;B4E1T6;B4DNX1;B4DNV4	V9HW22	HSPA6;HSPA7;HEL-S-72p;HSPA8;HSPA2;HEL-S-103;HSPA1B;HSPA1A	Heat shock 70 kDa protein 6;Putative heat shock 70 kDa protein 7;Heat shock cognate 71 kDa protein;Heat shock-related 70 kDa protein 2;Heat shock 70 kDa protein 1B;Heat shock 70 kDa protein 1A
1	0	11	1227.62	1.3435e-12	196.67	384660000	8	VEILANDQGNR	Q53FC7;B3KSM6;B2R6X5;P17066;P48741	Q53FC7	HSPA6;HSPA7	Heat shock 70 kDa protein 6;Putative heat shock 70 kDa protein 7
1	0	16	1686.93	5.0622e-15	199.84	82101000	7	ALESSIAPIVIFASNR	B5BUB1;Q9Y265;Q9Y265-2;E7ETR0;B3KRS7;H7C4G5;J3QLR1;H7C4I3	B5BUB1	RUVBL1	RuvB-like 1
0	1	22	2323.17	0.010089	58.564	47618000	1	AQTEGINISEEALNHLGEIGTK	B5BUB1;Q9Y265;H7C4G5;J3QLR1	B5BUB1	RUVBL1	RuvB-like 1
0	1	12	1079.63	0.0078457	90.614	103210000	3	AVLLAGPPGTGK	B5BUB1;Q9Y265;Q9Y265-2;E7ETR0;B3KRS7	B5BUB1	RUVBL1	RuvB-like 1
0	2	19	2280.08	0.0009343	100.97	1270100	1	DSIEKEHVEEISELFYDAK	B5BUB1;Q9Y265;H7C4G5	B5BUB1	RUVBL1	RuvB-like 1
0	1	11	1229.67	0.0012916	112.94	55189000	3	EACGVIVELIK	B5BUB1;Q9Y265;Q9Y265-2	B5BUB1	RUVBL1	RuvB-like 1
0	1	14	1707.8	0.0022681	94.688	1007300	1	EHVEEISELFYDAK	B5BUB1;Q9Y265;H7C4G5	B5BUB1	RUVBL1	RuvB-like 1
0	1	11	1058.56	0.0037873	100.69	57307000	2	GLGLDESGLAK	B5BUB1;Q9Y265;Q9Y265-2	B5BUB1	RUVBL1	RuvB-like 1
1	0	18	1947.99	0.000303	110.56	40003000	4	GTEDITSPHGIPLDLLDR	B5BUB1;Q9Y265;Q9Y265-2;E7ETR0;B3KRS7;H7C4G5;J3QLR1	B5BUB1	RUVBL1	RuvB-like 1
1	1	10	1265.64	7.0951e-26	246.08	39364000	3	KTEVLMENFR	B5BUB1;Q9Y265;Q9Y265-2;E7ETR0;B3KRS7	B5BUB1	RUVBL1	RuvB-like 1
0	1	11	1275.67	1.0056e-06	158.3	74905000	5	LDPSIFESLQK	B5BUB1;Q9Y265;Q9Y265-2;E7ETR0;B3KRS7	B5BUB1	RUVBL1	RuvB-like 1
1	0	13	1299.65	1.1059e-19	204.18	62551000	5	QAASGLVGQENAR	B5BUB1;Q9Y265;Q9Y265-2	B5BUB1	RUVBL1	RuvB-like 1
0	1	14	1384.79	3.6355e-40	266.85	85117000	7	TALALAIAQELGSK	B5BUB1;Q9Y265;Q9Y265-2;E7ETR0;B3KRS7	B5BUB1	RUVBL1	RuvB-like 1
0	1	10	1079.67	0.00025634	125.71	56745000	5	TISHVIIGLK	B5BUB1;Q9Y265;Q9Y265-2;E7ETR0;B3KRS7	B5BUB1	RUVBL1	RuvB-like 1
0	1	10	1240.58	0.0049852	97.597	27357000	2	TMLYTPQEMK	B5BUB1;Q9Y265;Q9Y265-2;E7ETR0;B3KRS7;H7C4G5;J3QLR1	B5BUB1	RUVBL1	RuvB-like 1
0	1	17	1733.88	5.5404e-08	164.01	1212900	1	VEAGDVIYIEANSGAVK	B5BUB1;Q9Y265;Q9Y265-2;E7ETR0;B3KRS7;H7C4I3	B5BUB1	RUVBL1	RuvB-like 1
0	1	17	1941.92	3.3949e-15	200	31382000	2	VPFCPMVGSEVYSTEIK	B5BUB1;Q9Y265;Q9Y265-2;E7ETR0;B3KRS7	B5BUB1	RUVBL1	RuvB-like 1
0	1	14	1529.88	3.0621e-25	222.56	94399000	5	YSVQLLTPANLLAK	B5BUB1;Q9Y265;H7C4G5	B5BUB1	RUVBL1	RuvB-like 1
1	0	12	1212.72	1.0064e-18	213.84	61270000	5	ALLANALTSALR	A6QKW0;A0A024R9W7;P57088;D6RAA6	A6QKW0	SHINC3;TMEM33	Transmembrane protein 33
1	0	9	955.545	0.013983	83.862	1394400	1	GSNSLPLLR	A6QKW0;A0A024R9W7;P57088;D6RAA6;H0Y8N0	A6QKW0	SHINC3;TMEM33	Transmembrane protein 33
1	0	11	1306.71	1.8529e-07	166.24	8107400	1	LCLQSIAFISR	A6QKW0;A0A024R9W7;P57088	A6QKW0	SHINC3;TMEM33	Transmembrane protein 33
1	0	8	996.55	0.0043943	95.741	18833000	2	LPHFQLSR	A6QKW0;A0A024R9W7;P57088;D6RAA6;H0Y8N0	A6QKW0	SHINC3;TMEM33	Transmembrane protein 33
0	1	10	1127.63	3.6923e-06	160.75	36281000	4	LSANQQNILK	A6QKW0;A0A024R9W7;P57088;D6RAA6;H0Y8N0	A6QKW0	SHINC3;TMEM33	Transmembrane protein 33
1	0	14	1585.76	4.2773e-32	241.41	13571000	2	AVTELNEPLSNEDR	A0A024R1K7;Q04917	A0A024R1K7	YWHAH	14-3-3 protein eta
1	0	10	1188.65	2.2381e-20	229.17	229890000	10	DSTLIMQLLR	V9HWD6;P31946-2;P31946;B5BU24;P31947-2;P31947;V9HW98;P62258;G9K389;G9K388;P62258-2;B7ZA86;K7EM20;D0PNI1;P63104;E7EX29;B0AZS6;P63104-2;B7Z2E6;H0YB80;Q2F831;P27348;B4DMT8;Q53S41;B4DY04;P61981;B4DE78;B4DHC4;B3KNB4;A0A024R1K7;Q04917;B2R6N6;Q9H4N8	D0PNI1	HEL-S-1;YWHAB;SFN;HEL2;YWHAE;YWHAE/FAM22B fusion;YWHAE/FAM22A fusion;YWHAZ;YWHAQ;YWHAG;YWHAH	14-3-3 protein beta/alpha;14-3-3 protein beta/alpha, N-terminally processed;14-3-3 protein sigma;14-3-3 protein epsilon;14-3-3 protein zeta/delta;14-3-3 protein theta;14-3-3 protein gamma;14-3-3 protein gamma, N-terminally processed;14-3-3 protein eta
0	1	15	1746.87	1.2035e-25	233.4	20768000	3	ELETVCNDVLSLLDK	A0A024R1K7;Q04917;B2R6N6;A2IDB2;Q9H4N8	A0A024R1K7	YWHAH	14-3-3 protein eta
2	0	9	1113.59	0.0017804	121.5	23034000	3	GDREQLLQR	A0A024R1K7;Q04917;B2R6N6;F8WEB6;A2IDB1	A0A024R1K7	YWHAH	14-3-3 protein eta
0	1	8	906.517	0.0040766	114.89	435250000	2	NLLSVAYK	V9HWD6;P31946-2;P31946;B5BU24;Q4VY20;Q4VY19;A0A0J9YWE8;Q59EQ2;A0A0J9YWZ2;P31947-2;P31947;Q3YBA8;V9HW98;P62258;G9K389;G9K388;P62258-2;B4DJF2;I3L3T1;K7EIT4;D0PNI1;P63104;E7EX29;E7ESK7;E5RGE1;E5RIR4;E9PD24;E7EVZ2;Q6LD62;P27348;E9PG15;Q53RR5;P61981;B4DE78;B4DHC4;B3KNB4;A0A024R1K7;Q04917;B2R6N6;A2IDB2	D0PNI1	HEL-S-1;YWHAB;SFN;HEL2;YWHAE;YWHAE/FAM22B fusion;YWHAE/FAM22A fusion;YWHAZ;14-3-3 protein;YWHAQ;YWHAG;YWHAH	14-3-3 protein beta/alpha;14-3-3 protein beta/alpha, N-terminally processed;14-3-3 protein sigma;14-3-3 protein epsilon;14-3-3 protein zeta/delta;14-3-3 protein theta;14-3-3 protein gamma;14-3-3 protein gamma, N-terminally processed;14-3-3 protein eta
0	1	12	1266.61	5.9939e-06	146.67	34127000	3	NSVVEASEAAYK	A0A024R1K7;Q04917;A2IDB2;Q9H4N8	A0A024R1K7	YWHAH	14-3-3 protein eta
0	1	32	3650.7	0.041273	26.099	13141000	1	AIVDCGFEHPSEVQHECIPQAILGMDVLCQAK	O00148;B4DX78;O00148-2;A0A024R7H0;O00148-3;A0A024RCM3;Q13838;Q13838-2;K7EPJ3;Q5STU3;F6WLT2;F6S4E6;A0A0A0MT12;F6TRA5;Q59G92;K7ENP6;A0A0G2JHN7;K7EL56;K7EIL8;F6U6E2;K7EN69;F6S2B7;F6SXL5;B4DH55;Q7KYK3;F6QYI9;A0A0G2JJL7;F6R6M7	O00148	DDX39A;DDX39;hCG_2005638;DDX39B;BAT1	ATP-dependent RNA helicase DDX39A;Spliceosome RNA helicase DDX39B
1	1	10	1242.73	0.00010564	149.33	150540000	4	DFLLKPELLR	O00148;B4DX78;O00148-2;A0A024R7H0;O00148-3;K7EQN7;A0A024RCM3;Q13838;Q13838-2;K7EPJ3;Q5STU3;F6WLT2;F6S4E6;A0A0A0MT12;F6TRA5;Q59G92;K7ENP6;A0A0G2JHN7;K7EL56;K7EIL8;F6U6E2;K7EN69;F6S2B7;F6SXL5;B4DH55;Q7KYK3;F6QYI9;A0A0G2JJL7;F6R6M7;B4DF34	O00148	DDX39A;DDX39;hCG_2005638;DDX39B;BAT1	ATP-dependent RNA helicase DDX39A;Spliceosome RNA helicase DDX39B
1	0	7	905.461	0.01153	111.95	27639000	2	DVQEIFR	O00148;B4DX78;O00148-2;A0A024R7H0;O00148-3;K7EQN7;A0A024RCM3;Q13838;Q13838-2;Q5STU3;F6WLT2;F6S4E6;A0A0A0MT12;F6TRA5;Q59G92;A0A0G2JJZ9;B4DP52;F6UJC5;B4DIZ8;B4DIJ6	O00148	DDX39A;DDX39;hCG_2005638;DDX39B	ATP-dependent RNA helicase DDX39A;Spliceosome RNA helicase DDX39B
1	0	12	1295.63	0.00010129	130.44	132170000	3	GSYVSIHSSGFR	O00148;B4DX78;O00148-2;A0A024R7H0;O00148-3;K7EQN7;A0A024RCM3;Q13838;Q13838-2;K7EPJ3;Q5STU3;F6WLT2;F6S4E6;A0A0A0MT12;F6TRA5;Q59G92;K7ENP6;A0A0G2JHN7;K7EL56;K7EIL8;F6U6E2;K7EN69;F6S2B7;F6SXL5;B4DH55;Q7KYK3;F6QYI9;A0A0G2JJL7;F6R6M7;B4DF34	O00148	DDX39A;DDX39;hCG_2005638;DDX39B;BAT1	ATP-dependent RNA helicase DDX39A;Spliceosome RNA helicase DDX39B
0	1	9	1161.51	0.02976	72.243	21932000	1	HFVLDECDK	O00148;B4DX78;O00148-2;A0A024R7H0;O00148-3;K7EQN7;K7EPJ3;A0A0D9SEM9	O00148	DDX39A;DDX39	ATP-dependent RNA helicase DDX39A
1	1	13	1419.74	0.0081555	83.204	1638700	1	KNCPHVVVGTPGR	O00148;B4DX78;O00148-2;A0A024R7H0;O00148-3;K7EQN7;K7EPJ3;A0A0D9SEM9	O00148	DDX39A;DDX39	ATP-dependent RNA helicase DDX39A
1	0	8	1034.49	5.8235e-05	159.58	19797000	2	MLEQLDMR	O00148;O00148-2;A0A024R7H0;O00148-3;K7EQN7;A0A024RCM3;Q13838;Q13838-2;K7EPJ3;Q5STU3;F6WLT2;F6S4E6;A0A0A0MT12;F6TRA5;Q59G92;A0A0G2JJZ9;B4DP52;F6UJC5;B4DIZ8;B4DIJ6	O00148	DDX39A;DDX39;hCG_2005638;DDX39B	ATP-dependent RNA helicase DDX39A;Spliceosome RNA helicase DDX39B
1	0	12	1291.65	1.4107e-07	158.34	99810000	5	NCPHVVVGTPGR	O00148;B4DX78;O00148-2;A0A024R7H0;O00148-3;K7EQN7;K7EPJ3;A0A0D9SEM9	O00148	DDX39A;DDX39	ATP-dependent RNA helicase DDX39A
0	1	11	1152.65	0.0029021	105.03	25475000	2	VSVFFGGLSIK	O00148;B4DX78;O00148-2;A0A024R7H0;O00148-3;K7EQN7;A0A0D9SEM9	O00148	DDX39A;DDX39	ATP-dependent RNA helicase DDX39A
1	0	19	2091	0.0001722	110.57	24317000	2	CGYAGSNFPEHIFPALVGR	P61160;P61160-2	P61160	ACTR2	Actin-related protein 2
1	0	12	1333.62	2.1574e-05	136.93	10804000	1	DLMVGDEASELR	P61160;B4DHK9	P61160	ACTR2	Actin-related protein 2
1	0	14	1612.73	4.2987e-06	142.39	54592000	3	GYAFNHSADFETVR	P61160;P61160-2;Q8IY98;F5H6T1;B4DHK9;B4DWQ5	P61160	ACTR2	Actin-related protein 2
1	0	17	1770.91	0.012762	62.861	1082500	1	HIVLSGGSTMYPGLPSR	P61160;P61160-2;Q8IY98;F5H6T1;B4DHK9;B4DWQ5	P61160	ACTR2	Actin-related protein 2
0	1	11	1391.65	5.8294e-05	137.01	46207000	3	HLWDYTFGPEK	P61160;P61160-2;Q8IY98;F5H6T1;B4DWQ5	P61160	ACTR2	Actin-related protein 2
0	1	15	1600.85	4.9711e-05	132.08	7372700	3	HMVFLGGAVLADIMK	P61160;P61160-2;Q8IY98;F5H6T1;B4DHK9	P61160	ACTR2	Actin-related protein 2
0	1	13	1642.77	9.0499e-12	183.06	884000	1	LCYVGYNIEQEQK	P61160;P61160-2;Q8IY98;F5H6T1;B4DHK9;B4DWQ5	P61160	ACTR2	Actin-related protein 2
0	1	7	771.449	0.046019	74.255	884400	1	VGNIEIK	P61160;P61160-2	P61160	ACTR2	Actin-related protein 2
0	1	12	1293.64	3.2985e-10	171.32	13720000	2	VVVCDNGTGFVK	P61160;P61160-2	P61160	ACTR2	Actin-related protein 2
1	0	13	1248.63	0.0028621	101.53	855240	1	AAAGGLAMLTSMR	Q9H3U1;Q9H3U1-3;Q9H3U1-2	Q9H3U1-2	UNC45A	Protein unc-45 homolog A
0	1	13	1485.61	4.7445e-57	302.28	33563000	2	AATECMCNLAMSK	Q9H3U1;Q9H3U1-3;Q9H3U1-2	Q9H3U1-2	UNC45A	Protein unc-45 homolog A
1	0	18	1958.93	3.777e-11	178.23	12380000	3	AIQTVSCLLQGPCDAGNR	Q9H3U1;Q9H3U1-2	Q9H3U1-2	UNC45A	Protein unc-45 homolog A
1	0	7	833.476	0.0027599	138.83	39357000	3	ALFQLSR	Q9H3U1;Q9H3U1-2	Q9H3U1-2	UNC45A	Protein unc-45 homolog A
0	1	16	1624.9	9.844e-34	255.91	68852000	3	ALIPLALEGTDVGQTK	Q9H3U1;Q9H3U1-2	Q9H3U1-2	UNC45A	Protein unc-45 homolog A
0	1	13	1319.74	0.00067601	113.69	1217600	1	ASFITANGVSLLK	Q9H3U1;Q9H3U1-2	Q9H3U1-2	UNC45A	Protein unc-45 homolog A
1	0	10	1069.62	0.00017218	136.02	103530000	3	ASQNLVVLAR	Q9H3U1;B4DZL0;Q9H3U1-2;B4DLE6	Q9H3U1-2	UNC45A	Protein unc-45 homolog A
1	0	29	3031.45	1.0894e-52	265.7	13078000	3	CGDYGGALAAYTQALGLDATPQDQAVLHR	Q9H3U1;B4DZL0;B4DEA9;Q9H3U1-2;B4DLE6	Q9H3U1-2	UNC45A	Protein unc-45 homolog A
0	1	9	999.596	2.9267e-10	188.91	48309000	2	DNALTLLIK	Q9H3U1;Q9H3U1-2	Q9H3U1-2	UNC45A	Protein unc-45 homolog A
0	1	16	1811.94	6.7593e-26	234.36	9438300	2	DPNNSLTLWVIDQGLK	Q9H3U1;Q9H3U1-2	Q9H3U1-2	UNC45A	Protein unc-45 homolog A
1	0	10	1039.57	0.005688	96.113	3917100	1	EGAIIVDPAR	Q9H3U1;Q9H3U1-2	Q9H3U1-2	UNC45A	Protein unc-45 homolog A
1	0	13	1519.69	2.8347e-15	196.37	30561000	3	EVQDLFEAQGNDR	Q9H3U1;Q9H3U1-3;Q9H3U1-2	Q9H3U1-2	UNC45A	Protein unc-45 homolog A
1	0	13	1343.72	1.4505e-08	164.64	38475000	4	GAVVVLNMVEASR	Q9H3U1;Q9H3U1-3;Q9H3U1-2	Q9H3U1-2	UNC45A	Protein unc-45 homolog A
0	1	7	938.453	0.01525	104.75	35804000	2	LCENYIK	Q9H3U1;Q9H3U1-2	Q9H3U1-2	UNC45A	Protein unc-45 homolog A
1	0	10	1169.64	3.9194e-09	184.44	70994000	3	LDQAVLDLQR	Q9H3U1;B4DZL0;Q9H3U1-2;B4DLE6	Q9H3U1-2	UNC45A	Protein unc-45 homolog A
0	2	13	1497.68	0.013842	81.185	48751000	2	LEDYDKAETEASK	Q9H3U1;B4DZL0;B4DEA9;Q9H3U1-2	Q9H3U1-2	UNC45A	Protein unc-45 homolog A
0	1	12	1169.54	7.4003e-08	162.93	23096000	3	LGSAGGTDFSMK	Q9H3U1;Q9H3U1-2	Q9H3U1-2	UNC45A	Protein unc-45 homolog A
1	0	15	1660.85	1.6655e-19	211.82	15137000	1	LLDMGETDLMLAALR	Q9H3U1;B4DZL0;Q9H3U1-2;B4DLE6	Q9H3U1-2	UNC45A	Protein unc-45 homolog A
1	0	15	1761.91	4.8009e-49	286.53	41197000	4	LLVLYSGEDDELLQR	Q9H3U1;Q9H3U1-3;Q9H3U1-2	Q9H3U1-2	UNC45A	Protein unc-45 homolog A
1	0	15	1691.82	2.626e-19	206.49	34799000	4	LTITSNPEMTFPGER	Q9H3U1;Q9H3U1-2	Q9H3U1-2	UNC45A	Protein unc-45 homolog A
0	1	9	948.531	0.017336	79.07	16790000	1	MSASILLSK	Q9H3U1;Q9H3U1-2	Q9H3U1-2	UNC45A	Protein unc-45 homolog A
1	0	13	1311.68	0.017335	77.633	5249300	1	PATPGASSVEQLR	Q9H3U1;B4DZL0;B4DEA9	Q9H3U1	UNC45A	Protein unc-45 homolog A
0	2	19	2140.15	8.876e-06	135.95	30221000	3	SLKDPNNSLTLWVIDQGLK	Q9H3U1;Q9H3U1-2	Q9H3U1-2	UNC45A	Protein unc-45 homolog A
1	0	9	1013.56	2.1765e-07	170.5	38911000	2	SNGVQLLQR	Q9H3U1;B4DZL0;Q9H3U1-2;B4DLE6	Q9H3U1-2	UNC45A	Protein unc-45 homolog A
0	1	11	1178.57	0.0018743	110.08	49388000	3	SWFEGQGLAGK	Q9H3U1;Q9H3U1-2	Q9H3U1-2	UNC45A	Protein unc-45 homolog A
1	0	9	989.514	0.01329	93.667	1819300	1	TASSVEQLR	Q9H3U1-2;B4DLE6	Q9H3U1-2	UNC45A	Protein unc-45 homolog A
1	1	10	1117.61	0.00018326	143.4	26047000	2	TASSVEQLRK	Q9H3U1-2;B4DLE6	Q9H3U1-2	UNC45A	Protein unc-45 homolog A
1	0	11	1235.58	0.00035175	126.66	8406900	2	TESPVLTSSCR	Q9H3U1;Q9H3U1-2	Q9H3U1-2	UNC45A	Protein unc-45 homolog A
1	0	12	1385.67	0.0038476	97.957	548170	1	TLVGICSEHQSR	Q9H3U1;B4DZL0;Q9H3U1-2;B4DLE6	Q9H3U1-2	UNC45A	Protein unc-45 homolog A
1	0	11	1130.67	9.473e-08	167.11	35515000	2	TVATLSILGTR	Q9H3U1;B4DZL0;Q9H3U1-2;B4DLE6	Q9H3U1-2	UNC45A	Protein unc-45 homolog A
0	1	14	1717.86	7.17e-08	160.81	23423000	3	VEQMFQILLDPEEK	Q9H3U1;B4DZL0;Q9H3U1-2;B4DLE6	Q9H3U1-2	UNC45A	Protein unc-45 homolog A
1	0	12	1417.75	2.7485e-08	166.11	13680000	2	VFLALVEEVEDR	Q9H3U1;Q9H3U1-2	Q9H3U1-2	UNC45A	Protein unc-45 homolog A
1	0	7	861.471	0.004943	129.47	33027000	1	VFQEALR	Q9H3U1;B4DZL0;Q9H3U1-2;B4DLE6	Q9H3U1-2	UNC45A	Protein unc-45 homolog A
1	0	20	2082.17	1.6774e-06	133.94	11403000	4	VLISNLLDLLTEVGVSGQGR	Q9H3U1;Q9H3U1-2	Q9H3U1-2	UNC45A	Protein unc-45 homolog A
1	0	12	1447.65	1.7961e-05	139.19	2712100	1	WLCNDQIDAGTR	Q9H3U1;Q9H3U1-2	Q9H3U1-2	UNC45A	Protein unc-45 homolog A
1	0	15	1614.83	1.4676e-32	251.68	1701000000	20	AILVDLEPGTMDSVR	Q5JP53;Q5SU16;P07437;B7ZAF0;Q6LC01;B4DY90;B4DMJ5;Q13509;Q9BV28;Q53G92;B2RBD5;A0A0B4J269;G3V5W4;G3V2R8;G3V3R4;G3V2N6;Q13885;B2R6L0;A5D907;A5D906	Q5JP53	TUBB;TUBB3;TUBB2A	Tubulin beta chain;Tubulin beta-3 chain;Tubulin beta-2A chain
0	1	15	1690.86	2.3561e-58	296.25	2293000000	37	ALTVPELTQQMFDAK	P04350;B4DE77;B4DJ43;B4DFH6;Q8IZ29;P68371;Q8N6N5;Q8IWP6;B3KML9;Q96HX0;Q13509;Q9BV28;Q53G92;B2RBD5;A0A0B4J269;Q13509-2;Q3ZCR3	Q8IZ29	TUBB4A;TUBB2C;TUBB4B;TUBB3	Tubulin beta-4A chain;Tubulin beta-4B chain;Tubulin beta-3 chain
0	1	32	3426.53	8.8047e-07	109.14	78491000	3	ECENCDCLQGFQLTHSLGGGTGSGMGTLLISK	Q13509;Q9BV28;Q53G92;B2RBD5;A0A0B4J269;Q13509-2;Q3ZCR3;G3V2A3	Q13509	TUBB3	Tubulin beta-3 chain
0	1	12	1389.68	3.5338e-77	343.75	817860000	17	EVDEQMLAIQSK	Q13509;Q9BV28;Q53G92;B2RBD5;A0A0B4J269;Q13509-2;Q3ZCR3;Q9BUF5;B3KS31;B4DP54;K7ESM5;B4E386	Q9BUF5	TUBB3;TUBB6	Tubulin beta-3 chain;Tubulin beta-6 chain
1	0	10	1129.59	6.0966e-07	166.86	2837600000	28	FPGQLNADLR	P04350;B4DE77;B4DJ43;M0R2D3;Q5JP53;Q5SU16;P07437;B7ZAF0;Q6LC01;B4DY90;Q5ST81;B7ZAK1;Q9BUU9;B4E052;B4DQN9;Q96B85;B4DXZ5;B4DMU8;Q1KSF8;Q8IZ29;P68371;Q8N6N5;Q8IWP6;B3KML9;Q96HX0;Q13509;Q9BV28;Q53G92;B2RBD5;A0A0B4J269;Q13509-2;Q3ZCR3;G3V2A3;Q13885;B2R6L0;A5D907;A5D906;A6NNZ2;Q3ZCM7;A0A075B736;Q5SQY0;Q9BUF5;B3KS31;B4DP54;K7ESM5;B4E386	Q8IZ29	TUBB4A;TUBB;XTP3TPATP1;TUBB2C;TUBB4B;TUBB3;TUBB2A;TUBB8;TUBB6	Tubulin beta-4A chain;Tubulin beta chain;Tubulin beta-4B chain;Tubulin beta-3 chain;Tubulin beta-2A chain;Tubulin beta-8 chain-like protein LOC260334;Tubulin beta-8 chain;Tubulin beta-6 chain
1	1	11	1257.68	0.00014411	136.49	257030000	11	FPGQLNADLRK	P04350;B4DE77;B4DJ43;M0R2D3;Q5JP53;Q5SU16;P07437;B7ZAF0;Q6LC01;B4DY90;Q5ST81;B7ZAK1;Q9BUU9;B4E052;B4DQN9;Q96B85;B4DXZ5;B4DMU8;Q1KSF8;Q8IZ29;P68371;Q8N6N5;Q8IWP6;B3KML9;Q96HX0;Q13509;Q9BV28;Q53G92;B2RBD5;A0A0B4J269;Q13509-2;Q3ZCR3;G3V2A3;Q13885;B2R6L0;A5D907;A5D906;A6NNZ2;Q3ZCM7;A0A075B736;Q5SQY0;Q9BUF5;B3KS31;B4DP54;K7ESM5;B4E386	Q8IZ29	TUBB4A;TUBB;XTP3TPATP1;TUBB2C;TUBB4B;TUBB3;TUBB2A;TUBB8;TUBB6	Tubulin beta-4A chain;Tubulin beta chain;Tubulin beta-4B chain;Tubulin beta-3 chain;Tubulin beta-2A chain;Tubulin beta-8 chain-like protein LOC260334;Tubulin beta-8 chain;Tubulin beta-6 chain
1	0	27	3076.4	7.3164e-32	221.04	334790000	7	FWEVISDEHGIDPSGNYVGDSDLQLER	Q13509;Q53G92;B2RBD5;G3V5W4;G3V2R8;G3V3R4;G3V2N6;G3V3J6;G3V3W7	Q13509	TUBB3	Tubulin beta-3 chain
1	0	18	1957.97	2.9565e-83	342.97	4299900000	26	GHYTEGAELVDSVLDVVR	Q5JP53;Q5SU16;P07437;B7ZAF0;Q6LC01;Q5ST81;B7ZAK1;B4DMJ5;Q8IZ29;P68371;Q8N6N5;Q8IWP6;Q13509;Q9BV28;Q53G92;B2RBD5;A0A0B4J269;Q13509-2;Q3ZCR3;G3V2A3;Q13885;B2R6L0;A5D907;A5D906	Q8IZ29	TUBB;TUBB2C;TUBB4B;TUBB3;TUBB2A	Tubulin beta chain;Tubulin beta-4B chain;Tubulin beta-3 chain;Tubulin beta-2A chain
1	1	19	2086.07	2.7928e-09	166.67	97910000	3	GHYTEGAELVDSVLDVVRK	Q5JP53;Q5SU16;P07437;B7ZAF0;Q6LC01;Q5ST81;B7ZAK1;B4DMJ5;Q8IZ29;P68371;Q8N6N5;Q8IWP6;Q13509;Q9BV28;Q53G92;B2RBD5;A0A0B4J269;Q13509-2;Q3ZCR3;G3V2A3;Q13885;B2R6L0;A5D907;A5D906	Q8IZ29	TUBB;TUBB2C;TUBB4B;TUBB3;TUBB2A	Tubulin beta chain;Tubulin beta-4B chain;Tubulin beta-3 chain;Tubulin beta-2A chain
0	1	12	1318.7	9.0304e-46	276.12	3767100000	30	IMNTFSVVPSPK	P04350;B4DE77;M0R2D3;M0QYM7;M0R042;Q5JP53;Q5SU16;P07437;B7ZAF0;Q6LC01;B4DY90;Q5ST81;B7ZAK1;Q9BUU9;B4E052;B4DQN9;Q1KSF8;Q8IZ29;P68371;Q8N6N5;Q8IWP6;B3KML9;Q13509;Q9BV28;Q53G92;B2RBD5;A0A0B4J269;Q13509-2;Q3ZCR3;G3V2A3	Q8IZ29	TUBB4A;TUBB;XTP3TPATP1;TUBB2C;TUBB4B;TUBB3	Tubulin beta-4A chain;Tubulin beta chain;Tubulin beta-4B chain;Tubulin beta-3 chain
1	0	10	1228.59	2.884e-41	289.22	3085200000	23	ISEQFTAMFR	P04350;B4DE77;B4DJ43;B4DFH6;Q5JP53;Q5SU16;P07437;B7ZAF0;Q6LC01;B4DY90;Q5ST81;B7ZAK1;Q9BUU9;B4E052;B4DQN9;Q96B85;B4DXZ5;B4DMU8;B4DMJ5;Q6P602;A4UCU2;Q8IZ29;P68371;Q8N6N5;Q8IWP6;B3KML9;Q96HX0;Q13509;Q9BV28;Q53G92;B2RBD5;A0A0B4J269;Q13509-2;Q13885;B2R6L0	Q8IZ29	TUBB4A;TUBB;TUBB2C;TUBB4B;TUBB3;TUBB2A	Tubulin beta-4A chain;Tubulin beta chain;Tubulin beta-4B chain;Tubulin beta-3 chain;Tubulin beta-2A chain
0	1	12	1396.66	2.8877e-30	242.97	1356600000	11	ISVYYNEASSHK	Q13509;Q9BV28;Q53G92;A0A0B4J269;G3V5W4;G3V2R8;G3V3R4;G3V2N6	Q13509	TUBB3	Tubulin beta-3 chain
0	2	33	3554.63	1.0316e-05	80.212	18044000	1	KECENCDCLQGFQLTHSLGGGTGSGMGTLLISK	Q13509;Q9BV28;Q53G92;B2RBD5;A0A0B4J269;Q13509-2;Q3ZCR3;G3V2A3	Q13509	TUBB3	Tubulin beta-3 chain
1	1	11	1270.72	0.0061434	106.62	31382000	1	KLAVNMVPFPR	P04350;B4DE77;B4DJ43;B4DFH6;Q5JP53;Q5SU16;P07437;B7ZAF0;Q6LC01;B4DY90;Q5ST81;Q9BUU9;B4E052;B4DQN9;Q96B85;B4DXZ5;B4DMU8;Q1KSF8;Q8IZ29;P68371;Q8N6N5;Q8IWP6;B3KML9;Q96HX0;Q13509;Q9BV28;Q53G92;B2RBD5;A0A0B4J269;Q13509-2;Q3ZCR3;Q13885;B2R6L0;A6NNZ2;Q3ZCM7;A0A075B736;Q5SQY0;Q9BUF5;B3KS31;B4DP54;K7ESM5;B4E386	Q8IZ29	TUBB4A;TUBB;XTP3TPATP1;TUBB2C;TUBB4B;TUBB3;TUBB2A;TUBB8;TUBB6	Tubulin beta-4A chain;Tubulin beta chain;Tubulin beta-4B chain;Tubulin beta-3 chain;Tubulin beta-2A chain;Tubulin beta-8 chain-like protein LOC260334;Tubulin beta-8 chain;Tubulin beta-6 chain
1	0	25	2604.32	1.6712e-25	210.31	867780000	16	LATPTYGDLNHLVSATMSGVTTSLR	Q13509;Q9BV28;Q53G92;B2RBD5;A0A0B4J269;Q13509-2;Q3ZCR3;G3V2A3	Q13509	TUBB3	Tubulin beta-3 chain
1	0	10	1142.63	9.2193e-12	199.46	5643900000	45	LAVNMVPFPR	P04350;B4DE77;B4DJ43;B4DFH6;Q5JP53;Q5SU16;P07437;B7ZAF0;Q6LC01;B4DY90;Q5ST81;Q9BUU9;B4E052;B4DQN9;Q96B85;B4DXZ5;B4DMU8;Q1KSF8;Q8IZ29;P68371;Q8N6N5;Q8IWP6;B3KML9;Q96HX0;Q13509;Q9BV28;Q53G92;B2RBD5;A0A0B4J269;Q13509-2;Q3ZCR3;Q13885;B2R6L0;A6NNZ2;Q3ZCM7;A0A075B736;Q5SQY0;Q9BUF5;B3KS31;B4DP54;K7ESM5;B4E386	Q8IZ29	TUBB4A;TUBB;XTP3TPATP1;TUBB2C;TUBB4B;TUBB3;TUBB2A;TUBB8;TUBB6	Tubulin beta-4A chain;Tubulin beta chain;Tubulin beta-4B chain;Tubulin beta-3 chain;Tubulin beta-2A chain;Tubulin beta-8 chain-like protein LOC260334;Tubulin beta-8 chain;Tubulin beta-6 chain
1	0	14	1603.83	6.5668e-08	151.55	755330000	20	LHFFMPGFAPLTAR	Q13509;Q9BV28;Q53G92;B2RBD5;A0A0B4J269;Q13509-2;Q3ZCR3	Q13509	TUBB3	Tubulin beta-3 chain
0	1	17	1872.93	9.9631e-42	273.44	515730000	10	MSSTFIGNSTAIQELFK	Q13509;Q9BV28;Q53G92;B2RBD5;A0A0B4J269;Q13509-2	Q13509	TUBB3	Tubulin beta-3 chain
1	0	9	1064.42	2.7749e-06	166.34	1076000000	25	NMMAACDPR	P04350;B4DE77;B4DJ43;B4DFH6;Q5JP53;Q5SU16;P07437;B7ZAF0;Q6LC01;B4DY90;Q5ST81;B7ZAK1;Q9BUU9;B4E052;B4DQN9;Q96B85;B4DXZ5;B4DMU8;Q1KSF8;Q8IZ29;P68371;Q8N6N5;Q8IWP6;B3KML9;Q96HX0;A4UCT2;Q13509;Q9BV28;Q53G92;B2RBD5;A0A0B4J269;Q13509-2;Q3ZCR3;Q13885;B2R6L0;A6NNZ2;Q3ZCM7;A0A075B736;Q5SQY0;Q9BUF5;B3KS31;B4DP54;K7ESM5;B4E386	Q8IZ29	TUBB4A;TUBB;XTP3TPATP1;TUBB2C;TUBB4B;TUBB3;TUBB2A;TUBB8;TUBB6	Tubulin beta-4A chain;Tubulin beta chain;Tubulin beta-4B chain;Tubulin beta-3 chain;Tubulin beta-2A chain;Tubulin beta-8 chain-like protein LOC260334;Tubulin beta-8 chain;Tubulin beta-6 chain
0	1	14	1695.83	5.3944e-49	286.74	3316800000	21	NSSYFVEWIPNNVK	P04350;B4DE77;B4DJ43;B4DFH6;Q5JP53;Q5SU16;P07437;B7ZAF0;Q6LC01;B4DY90;Q5ST81;B7ZAK1;Q9BUU9;B4E052;B4DQN9;Q96B85;B4DXZ5;B4DMJ5;Q6P602;Q8IZ29;P68371;Q8N6N5;Q8IWP6;B3KML9;Q96HX0;A4UCT2;Q13509;Q9BV28;B2RBD5;A0A0B4J269;Q13509-2;Q13885;B2R6L0;Q9BUF5;B3KS31;B4DP54;K7ESM5;B4E386	Q8IZ29	TUBB4A;TUBB;TUBB2C;TUBB4B;TUBB3;TUBB2A;TUBB6	Tubulin beta-4A chain;Tubulin beta chain;Tubulin beta-4B chain;Tubulin beta-3 chain;Tubulin beta-2A chain;Tubulin beta-6 chain
0	1	17	1821.84	0.0093252	80.361	807840	1	PDNFIFGQSGAGNNWAK	Q13509;Q9BV28;Q53G92;B2RBD5;A0A0B4J269;Q13509-2;Q3ZCR3;G3V2A3;G3V542	Q13509	TUBB3	Tubulin beta-3 chain
2	0	11	1384.69	0.021532	89.44	19768000	1	RISEQFTAMFR	P04350;B4DE77;B4DJ43;B4DFH6;Q5JP53;Q5SU16;P07437;B7ZAF0;Q6LC01;B4DY90;Q5ST81;B7ZAK1;Q9BUU9;B4E052;B4DQN9;Q96B85;B4DXZ5;B4DMU8;B4DMJ5;Q6P602;A4UCU2;Q8IZ29;P68371;Q8N6N5;Q8IWP6;B3KML9;Q96HX0;Q13509;Q9BV28;Q53G92;B2RBD5;A0A0B4J269;Q13509-2;Q13885;B2R6L0	Q8IZ29	TUBB4A;TUBB;TUBB2C;TUBB4B;TUBB3;TUBB2A	Tubulin beta-4A chain;Tubulin beta chain;Tubulin beta-4B chain;Tubulin beta-3 chain;Tubulin beta-2A chain
1	0	9	990.504	0.0027057	95.815	15859000	2	SGAFGHLFR	Q13509;Q9BV28;Q53G92;B2RBD5;A0A0B4J269;Q13509-2;Q3ZCR3;G3V2A3;G3V5W4;G3V2R8;G3V3R4;G3V2N6;G3V542	Q13509	TUBB3	Tubulin beta-3 chain
1	1	26	2794.34	7.1799e-41	252.11	664490000	12	SGAFGHLFRPDNFIFGQSGAGNNWAK	Q13509;Q9BV28;Q53G92;B2RBD5;A0A0B4J269;Q13509-2;Q3ZCR3;G3V2A3;G3V542	Q13509	TUBB3	Tubulin beta-3 chain
1	0	9	1025.53	4.1428e-05	149.72	200450000	28	VAVCDIPPR	Q13509;Q9BV28;Q53G92;B2RBD5;A0A0B4J269;Q13509-2;Q9BUF5;B3KS31;B4DP54;K7ESM5;B4E386	Q9BUF5	TUBB3;TUBB6	Tubulin beta-3 chain;Tubulin beta-6 chain
1	0	9	1068.6	7.9349e-14	204.07	1759100000	10	YLTVATVFR	Q13509;Q9BV28;Q53G92;B2RBD5;A0A0B4J269;Q13509-2;Q3ZCR3;Q9BUF5;B3KS31;B4DP54;K7ESM5;B4E386	Q9BUF5	TUBB3;TUBB6	Tubulin beta-3 chain;Tubulin beta-6 chain
1	0	14	1405.67	8.3327e-11	177.21	149380000	5	AHGGYSVFAGVGER	V9HW31;P06576;Q0QEN7;H0YH81;F8W079;F8W0P7;H0YI37	V9HW31	HEL-S-271;ATP5B	ATP synthase subunit beta;ATP synthase subunit beta, mitochondrial
1	0	19	1987.03	2.5984e-11	171.52	64529000	5	AIAELGIYPAVDPLDSTSR	V9HW31;P06576;Q0QEN7;H0YH81	V9HW31	HEL-S-271;ATP5B	ATP synthase subunit beta;ATP synthase subunit beta, mitochondrial
0	1	18	2059.99	7.439e-60	297.73	72316000	6	EGNDLYHEMIESGVINLK	V9HW31;P06576;Q0QEN7;H0YH81;F8W079;F8W0P7;H0YI37	V9HW31	HEL-S-271;ATP5B	ATP synthase subunit beta;ATP synthase subunit beta, mitochondrial
0	1	18	2022	1.0009e-21	220.78	211240000	7	FLSQPFQVAEVFTGHMGK	V9HW31;P06576;Q0QEN7	V9HW31	HEL-S-271;ATP5B	ATP synthase subunit beta;ATP synthase subunit beta, mitochondrial
1	0	14	1434.75	7.8387e-40	258.39	155950000	4	FTQAGSEVSALLGR	V9HW31;P06576;Q0QEN7;H0YH81;F8W0P7	V9HW31	HEL-S-271;ATP5B	ATP synthase subunit beta;ATP synthase subunit beta, mitochondrial
0	1	30	3349.63	0.00082646	66.437	20908000	1	GFQQILAGEYDHLPEQAFYMVGPIEEAVAK	V9HW31;P06576	V9HW31	HEL-S-271;ATP5B	ATP synthase subunit beta;ATP synthase subunit beta, mitochondrial
1	0	36	3713.88	1.9136e-10	127.76	14680000	2	GSITSVQAIYVPADDLTDPAPATTFAHLDATTVLSR	V9HW31;P06576;Q0QEN7;H0YH81;H0YI37	V9HW31	HEL-S-271;ATP5B	ATP synthase subunit beta;ATP synthase subunit beta, mitochondrial
0	1	11	974.555	0.019331	76.943	102060000	2	IGLFGGAGVGK	V9HW31;P06576;Q0QEN7;H0YH81;F8W079	V9HW31	HEL-S-271;ATP5B	ATP synthase subunit beta;ATP synthase subunit beta, mitochondrial
1	0	16	1814.86	0.004301	83.292	73713000	2	IMDPNIVGSEHYDVAR	V9HW31;P06576;Q0QEN7;H0YH81	V9HW31	HEL-S-271;ATP5B	ATP synthase subunit beta;ATP synthase subunit beta, mitochondrial
1	0	12	1384.7	0.0022155	106.54	81651000	2	IMNVIGEPIDER	V9HW31;P06576;Q0QEN7;H0YH81;F8W079	V9HW31	HEL-S-271;ATP5B	ATP synthase subunit beta;ATP synthase subunit beta, mitochondrial
1	0	21	2265.08	2.6496e-44	263.9	22585000	3	IPSAVGYQPTLATDMGTMQER	V9HW31;P06576;Q0QEN7;H0YH81;F8W079;F8W0P7;H0YI37	V9HW31	HEL-S-271;ATP5B	ATP synthase subunit beta;ATP synthase subunit beta, mitochondrial
1	0	10	1037.59	0.015887	79.201	93708000	2	IPVGPETLGR	V9HW31;P06576;Q0QEN7;H0YH81;F8W079	V9HW31	HEL-S-271;ATP5B	ATP synthase subunit beta;ATP synthase subunit beta, mitochondrial
1	0	15	1649.91	3.6598e-34	256.35	188180000	6	LVLEVAQHLGESTVR	V9HW31;P06576;Q0QEN7	V9HW31	HEL-S-271;ATP5B	ATP synthase subunit beta;ATP synthase subunit beta, mitochondrial
0	1	27	3043.5	1.7336e-05	107.75	22760000	2	QFAPIHAEAPEFMEMSVEQEILVTGIK	V9HW31;P06576;Q0QEN7;H0YH81;F8W079	V9HW31	HEL-S-271;ATP5B	ATP synthase subunit beta;ATP synthase subunit beta, mitochondrial
1	1	24	2674.37	2.1208e-06	119.43	22495000	2	SLQDIIAILGMDELSEEDKLTVSR	V9HW31;P06576;Q0QEN7;F8W079	V9HW31	HEL-S-271;ATP5B	ATP synthase subunit beta;ATP synthase subunit beta, mitochondrial
1	0	12	1261.63	0.023674	74.237	1676500	2	TIAMDGTEGLVR	V9HW31;P06576;Q0QEN7;H0YH81;F8W079	V9HW31	HEL-S-271;ATP5B	ATP synthase subunit beta;ATP synthase subunit beta, mitochondrial
0	1	13	1456.83	3.1242e-32	249.69	46181000	7	TVLIMELINNVAK	V9HW31;P06576;Q0QEN7;H0YH81;F8W079;F8W0P7;H0YI37	V9HW31	HEL-S-271;ATP5B	ATP synthase subunit beta;ATP synthase subunit beta, mitochondrial
1	0	13	1438.78	4.6285e-20	214	162970000	3	VALTGLTVAEYFR	V9HW31;P06576;Q0QEN7;H0YH81;F8W0P7	V9HW31	HEL-S-271;ATP5B	ATP synthase subunit beta;ATP synthase subunit beta, mitochondrial
1	0	15	1600.8	7.8687e-11	180.11	34159000	2	VALVYGQMNEPPGAR	V9HW31;P06576;Q0QEN7;H0YH81;F8W0P7	V9HW31	HEL-S-271;ATP5B	ATP synthase subunit beta;ATP synthase subunit beta, mitochondrial
0	1	9	898.512	0.015136	81.95	27050000	1	VLDSGAPIK	V9HW31;P06576;Q0QEN7;H0YH81;F8W079	V9HW31	HEL-S-271;ATP5B	ATP synthase subunit beta;ATP synthase subunit beta, mitochondrial
1	1	19	1918.09	5.7552e-08	150.59	53672000	3	VLDSGAPIKIPVGPETLGR	V9HW31;P06576;Q0QEN7;H0YH81;F8W079	V9HW31	HEL-S-271;ATP5B	ATP synthase subunit beta;ATP synthase subunit beta, mitochondrial
0	1	10	1087.63	0.0018657	112.3	153650000	4	VVDLLAPYAK	V9HW31;P06576;Q0QEN7;H0YH81;F8W079	V9HW31	HEL-S-271;ATP5B	ATP synthase subunit beta;ATP synthase subunit beta, mitochondrial
0	1	8	989.485	0.046509	67.897	6452100	1	ELVLDNCK	Q53F35;Q92688-2;Q92688	Q53F35	ANP32B	Acidic leucine-rich nuclear phosphoprotein 32 family member B
0	1	11	1192.62	1.3195e-06	155.26	75146000	6	IFGGLDMLAEK	Q53F35;Q92688-2;Q92688	Q53F35	ANP32B	Acidic leucine-rich nuclear phosphoprotein 32 family member B
0	3	12	1383.83	0.0039824	103.14	6453500	1	LKDISTLEPLKK	Q53F35;Q92688-2;Q92688	Q53F35	ANP32B	Acidic leucine-rich nuclear phosphoprotein 32 family member B
1	0	13	1565.81	3.0091e-15	195.94	104510000	4	LLPQLTYLDGYDR	H0YN26;Q6PKH8;Q08AJ6;P39687;Q53F35;Q92688-2;Q92688	H0YN26	ANP32A;ANP32B	Acidic leucine-rich nuclear phosphoprotein 32 family member A;Acidic leucine-rich nuclear phosphoprotein 32 family member B
0	1	13	1419.78	1.7906e-06	145	97459000	7	LPNLTHLNLSGNK	Q53F35;Q92688-2;Q92688	Q53F35	ANP32B	Acidic leucine-rich nuclear phosphoprotein 32 family member B
2	0	7	935.566	0.0096134	107.01	16586000	3	RIHLELR	H0YN26;Q6PKH8;Q08AJ6;P39687;Q1AHP8;H7BZ09;Q53F35;Q92688-2;Q92688	H0YN26	ANP32A;ANP32B	Acidic leucine-rich nuclear phosphoprotein 32 family member A;Acidic leucine-rich nuclear phosphoprotein 32 family member B
1	0	16	1971.9	2.007e-70	325.77	70479000	7	SLDLFNCEVTNLNDYR	H0YN26;Q6PKH8;Q08AJ6;P39687;Q1AHP8;Q53F35;Q92688-2;Q92688	H0YN26	ANP32A;ANP32B	Acidic leucine-rich nuclear phosphoprotein 32 family member A;Acidic leucine-rich nuclear phosphoprotein 32 family member B
1	0	15	1657.9	1.3643e-32	252.01	17976000	4	AAVENLPTFLVELSR	B2RBR9;Q14974;J3QR48	B2RBR9	KPNB1	Importin subunit beta-1
0	1	15	1666.82	2.8403e-19	205.3	6501300	1	ESCLEAYTGIVQGLK	B2RBR9;Q14974;B7Z752;Q14974-2;B7Z5M1;J3KTM9	B2RBR9	KPNB1	Importin subunit beta-1
0	1	16	1758.03	1.4328e-05	144.08	13863000	3	GALQYLVPILTQTLTK	B2RBR9;Q14974;B7Z752;Q14974-2	B2RBR9	KPNB1	Importin subunit beta-1
0	1	15	1604.88	2.9769e-32	246.75	11641000	2	LAATNALLNSLEFTK	B2RBR9;Q14974;B7Z752;Q14974-2;B7Z5M1;J3KTM9	B2RBR9	KPNB1	Importin subunit beta-1
1	0	13	1444.77	7.6179e-16	201.48	11284000	3	SNEILTAIIQGMR	B2RBR9;Q14974;B7Z752;Q14974-2;B7Z5M1;J3KTM9;J3QRG4	B2RBR9	KPNB1	Importin subunit beta-1
0	1	9	954.586	0.00068071	130.27	13699000	3	VAALQNLVK	B2RBR9;Q14974;B7Z752;Q14974-2;B7Z5M1;J3KTM9	B2RBR9	KPNB1	Importin subunit beta-1
1	0	12	1224.66	0.00034753	123.26	29588000	2	VLANPGNSQVAR	B2RBR9;Q14974;J3QR48	B2RBR9	KPNB1	Importin subunit beta-1
0	1	9	988.508	0.047558	62.463	6700600	1	ALEVSEDVK	A0A024R9Y7;Q9UNF1;B4DX55;B4DNG7	A0A024R9Y7	MAGED2	Melanoma-associated antigen D2
1	0	8	849.42	0.0076391	104.06	4869300	1	ALMASMAR	A0A024R9Y7;Q9UNF1;Q5H909;Q9UNF1-2	A0A024R9Y7	MAGED2	Melanoma-associated antigen D2
1	0	8	870.492	0.0077437	103.74	26882000	2	DVALLQGR	A0A024R9Y7;Q9UNF1;Q5H909;Q9UNF1-2;B4DX55;Q5H907;B4DWM5	A0A024R9Y7	MAGED2	Melanoma-associated antigen D2
1	0	8	916.492	0.0029982	121.29	16251000	3	GPIAFWAR	A0A024R9Y7;Q9UNF1;Q5H909;Q9UNF1-2	A0A024R9Y7	MAGED2	Melanoma-associated antigen D2
1	0	22	2189.91	4.3942e-10	153.06	4482600	3	HLDGEEDGSSDQSQASGTTGGR	A0A024R9Y7;Q9UNF1;Q5H909;Q9UNF1-2;Q5H907	A0A024R9Y7	MAGED2	Melanoma-associated antigen D2
1	1	16	1744.97	0.030543	49.62	25414000	1	LGLRPGIHHSLFGDVK	A0A024R9Y7;Q9UNF1;Q5H909;Q9UNF1-2;B4DX55;Q5H907	A0A024R9Y7	MAGED2	Melanoma-associated antigen D2
1	0	13	1434.71	1.0233e-11	182.72	7639100	1	LQSSQEPEAPPPR	A0A024R9Y7;Q9UNF1;Q5H909;Q9UNF1-2;B4DX55;Q5H907;B4DWM5	A0A024R9Y7	MAGED2	Melanoma-associated antigen D2
1	0	11	1287.68	1.2465e-06	155.97	16193000	2	SSEAVIWEVLR	A0A024R9Y7;Q9UNF1;Q5H909;Q9UNF1-2;B4DX55;Q5H907;B4DWM5	A0A024R9Y7	MAGED2	Melanoma-associated antigen D2
1	0	16	1950.93	7.0219e-08	163.9	12301000	3	VPNSNPPEYEFFWGLR	A0A024R9Y7;Q9UNF1;Q5H909;Q9UNF1-2;B4DX55;Q5H907	A0A024R9Y7	MAGED2	Melanoma-associated antigen D2
1	0	9	1087.54	0.0019682	128.27	41197000	2	ADQVCINLR	Q53TA7;Q59G97;A8KAJ3;A0A0S2Z4F1;Q12805-2;Q12805-4;Q12805-3;Q12805;A0A0U1RQV3;B4DWH0;B3KS53;A0A0S2Z3V1;B2R6M6;Q12805-5	Q53TA7	EFEMP1	EGF-containing fibulin-like extracellular matrix protein 1
1	0	11	1352.55	1.5847e-06	152.7	8166900	2	CVCPVSNAMCR	Q53TA7;Q59G97;A8KAJ3;A0A0S2Z4F1;Q12805-2;Q12805-4;Q12805-3;Q12805;A0A0U1RQV3;B4DWH0;B3KS53;A0A0S2Z3V1;B2R6M6;Q12805-5	Q53TA7	EFEMP1	EGF-containing fibulin-like extracellular matrix protein 1
1	0	13	1630.71	6.4689e-26	234.49	37029000	4	FSCMCPQGYQVVR	Q53TA7;Q59G97;A8KAJ3;A0A0S2Z4F1;Q12805-2;Q12805-4;Q12805-3;Q12805;A0A0U1RQV3;B4DWH0;B3KS53;A0A0S2Z3V1;B2R6M6;Q12805-5	Q53TA7	EFEMP1	EGF-containing fibulin-like extracellular matrix protein 1
0	1	13	1498.63	3.4596e-49	291.5	23189000	3	GSFACQCPPGYQK	Q53TA7;Q59G97;A8KAJ3;A0A0S2Z4F1;Q12805-2;Q12805-4;Q12805-3;Q12805;A0A0U1RQV3;B4DWH0;B3KS53;A0A0S2Z3V1;B2R6M6;Q12805-5	Q53TA7	EFEMP1	EGF-containing fibulin-like extracellular matrix protein 1
1	0	10	1322.52	1.9882e-15	211.37	11607000	2	LNCEDIDECR	Q53TA7;Q59G97;A8KAJ3;A0A0S2Z4F1;Q12805-2;Q12805-4;Q12805-3;Q12805;B3KS53;B2R6M6	Q53TA7	EFEMP1	EGF-containing fibulin-like extracellular matrix protein 1
1	0	14	1715.79	1.6675e-07	151.3	4027100	1	NPCQDPYILTPENR	Q53TA7;Q59G97;A8KAJ3;A0A0S2Z4F1;Q12805-2;Q12805-4;Q12805-3;Q12805;A0A0U1RQV3;B4DWH0;B3KS53;A0A0S2Z3V1;B2R6M6;Q12805-5	Q53TA7	EFEMP1	EGF-containing fibulin-like extracellular matrix protein 1
0	1	13	1371.78	1.758e-11	180.61	21362000	2	QTSPVSAMLVLVK	Q53TA7;Q59G97;A8KAJ3;A0A0S2Z4F1;Q12805-2;Q12805-4;Q12805-3;Q12805;A0A0U1RQV3;B4DWH0;B3KS53;A0A0S2Z3V1;B2R6M6;Q12805-5	Q53TA7	EFEMP1	EGF-containing fibulin-like extracellular matrix protein 1
1	0	11	1284.57	4.7055e-17	216.91	27754000	2	SGNENGEFYLR	Q53TA7;Q59G97;A8KAJ3;A0A0S2Z4F1;Q12805-2;Q12805-4;Q12805-3;Q12805;A0A0U1RQV3;B4DWH0;A0A0S2Z3V1;B2R6M6;Q12805-5	Q53TA7	EFEMP1	EGF-containing fibulin-like extracellular matrix protein 1
1	0	23	2599.33	0.034662	55.02	546350	1	SVPSDIFQIQATTIYANTINTFR	Q53TA7;Q59G97;A8KAJ3;A0A0S2Z4F1;Q12805-2;Q12805-4;Q12805-3;Q12805;A0A0U1RQV3;B4DWH0;B3KS53;A0A0S2Z3V1;Q12805-5	Q53TA7	EFEMP1	EGF-containing fibulin-like extracellular matrix protein 1
1	0	15	1928.73	1.1425e-05	144.15	303720	1	TCQDINECETTNECR	Q53TA7;Q59G97;A8KAJ3;A0A0S2Z4F1;Q12805-2;Q12805-4;Q12805-3;Q12805;A0A0U1RQV3;B4DWH0;B3KS53;A0A0S2Z3V1;B2R6M6;Q12805-5	Q53TA7	EFEMP1	EGF-containing fibulin-like extracellular matrix protein 1
1	0	17	1693.85	3.2841e-33	252.82	25986000	4	ALDVGSGSGILTACFAR	A0A0A0MRJ6;H7BY58;P22061;P22061-2;B7Z972;C9J0F2	A0A0A0MRJ6	PCMT1	Protein-L-isoaspartate O-methyltransferase;Protein-L-isoaspartate(D-aspartate) O-methyltransferase
1	0	11	1258.62	0.0028814	105.13	15979000	2	ELVDDSVNNVR	A0A0A0MRJ6;H7BY58;P22061;P22061-2;B7Z972;F6S8N6;C9J0F2	A0A0A0MRJ6	PCMT1	Protein-L-isoaspartate O-methyltransferase;Protein-L-isoaspartate(D-aspartate) O-methyltransferase
1	1	11	1187.61	0.0025873	113.95	10631000	1	KDDPTLLSSGR	A0A0A0MRJ6;H7BY58;P22061;P22061-2;B7Z972;F6S8N6	A0A0A0MRJ6	PCMT1	Protein-L-isoaspartate O-methyltransferase;Protein-L-isoaspartate(D-aspartate) O-methyltransferase
0	1	19	2042.05	2.2355e-11	173.49	24612000	3	LILPVGPAGGNQMLEQYDK	A0A0A0MRJ6;H7BY58;P22061;P22061-2;B7Z972;F6S8N6	A0A0A0MRJ6	PCMT1	Protein-L-isoaspartate O-methyltransferase;Protein-L-isoaspartate(D-aspartate) O-methyltransferase
1	1	34	3503.79	6.8292e-07	94.767	16451000	2	MGYAEEAPYDAIHVGAAAPVVPQALIDQLKPGGR	A0A0A0MRJ6;H7BY58;P22061;P22061-2;B7Z972;F6S8N6	A0A0A0MRJ6	PCMT1	Protein-L-isoaspartate O-methyltransferase;Protein-L-isoaspartate(D-aspartate) O-methyltransferase
1	0	14	1476.74	8.0474e-05	126.83	163630000	7	SGGASHSELIHNLR	A0A0A0MRJ6;H7BY58;P22061;P22061-2;B7Z972;F6S8N6;F8WDT3;F8WAV5;F8WAX2;H7C4X2	A0A0A0MRJ6	PCMT1	Protein-L-isoaspartate O-methyltransferase;Protein-L-isoaspartate(D-aspartate) O-methyltransferase
1	0	10	1179.6	7.7581e-06	152.7	2824800	1	VFEVMLATDR	A0A0A0MRJ6;H7BY58;P22061;P22061-2;F6S8N6;F8WDT3;F8WAV5;F8WAX2	A0A0A0MRJ6	PCMT1	Protein-L-isoaspartate O-methyltransferase;Protein-L-isoaspartate(D-aspartate) O-methyltransferase
0	1	8	893.533	0.0075139	104.44	43829000	3	VIGIDHIK	A0A0A0MRJ6;H7BY58;P22061;P22061-2;B7Z972;F6S8N6;C9J0F2	A0A0A0MRJ6	PCMT1	Protein-L-isoaspartate O-methyltransferase;Protein-L-isoaspartate(D-aspartate) O-methyltransferase
1	0	9	941.529	0.0038705	106.62	43096000	2	VQLVVGDGR	A0A0A0MRJ6;H7BY58;P22061;P22061-2;B7Z972;F6S8N6	A0A0A0MRJ6	PCMT1	Protein-L-isoaspartate O-methyltransferase;Protein-L-isoaspartate(D-aspartate) O-methyltransferase
0	1	9	1103.53	0.033377	70.256	5499200	2	DSFPWEVPK	P31153;B4E1K2	P31153	MAT2A	S-adenosylmethionine synthase isoform type-2
1	0	15	1443.75	7.7938e-15	198.38	44624000	3	FVIGGPQGDAGLTGR	P31153;B4DEX8;P31153-2	P31153	MAT2A	S-adenosylmethionine synthase isoform type-2;S-adenosylmethionine synthase
2	0	11	1284.73	0.021682	76.228	44995000	2	NFDLRPGVIVR	P31153;B4DEX8;P31153-2;B4E1K2;B4DFQ8;B4DN74;A8K455;Q00266	P31153	MAT2A;MAT1A	S-adenosylmethionine synthase isoform type-2;S-adenosylmethionine synthase;S-adenosylmethionine synthase isoform type-1
1	0	15	1805.86	0.021124	59.225	30358000	2	YLDEDTIYHLQPSGR	P31153;B4DEX8;P31153-2	P31153	MAT2A	S-adenosylmethionine synthase isoform type-2;S-adenosylmethionine synthase
1	0	13	1642.88	0.0013865	98.156	30573000	4	ALYYLQIHPQELR	Q16531;F5GY55;B7Z2A1;B4DSA8;B4DZP5	Q16531	DDB1	DNA damage-binding protein 1
0	1	9	1032.62	0.0004607	133.23	8278700	3	DLLFILTAK	Q16531;F5GY55;B7Z2A1;B4DZP5;F5GWI0;F5H2L3;F5GZY8;F5GYG8	Q16531	DDB1	DNA damage-binding protein 1
1	0	10	1113.59	0.002893	107.45	976810	1	EMLGGEIIPR	Q16531;F5GY55;B7Z2A1;B4DSA8;B4DZP5	Q16531	DDB1	DNA damage-binding protein 1
1	0	8	977.537	0.0163	88.819	402240	1	IAVMELFR	Q16531;F5GY55;B7Z2A1;B4DSA8;B4DZP5;F5GWI0;F5H2L3;Q16531-2;F5GZY8;F5GYG8;F5H198	Q16531	DDB1	DNA damage-binding protein 1
1	0	16	1931.89	0.0001178	130.64	2413900	3	ICYQEVSQCFGVLSSR	Q16531;F5GY55;B7Z2A1;B4DSA8;B4DZP5	Q16531	DDB1	DNA damage-binding protein 1
1	0	7	973.477	0.014245	79.451	23848000	3	IEHSFWR	Q16531;B4DSA8;B4DZP5;Q16531-2	Q16531	DDB1	DNA damage-binding protein 1
1	1	30	2951.47	1.528e-10	146.34	1696200	1	IEVQDTSGGTTALRPSASTQALSSSVSSSK	Q16531;F5GY55;B7Z2A1;B4DZP5	Q16531	DDB1	DNA damage-binding protein 1
0	1	10	1154.6	0.011414	86.344	3235100	1	IVVFQYSDGK	Q16531;F5GY55;B7Z2A1;B4DSA8;B4DZP5;Q16531-2	Q16531	DDB1	DNA damage-binding protein 1
1	2	24	2648.37	4.2193e-15	169.33	22110000	4	KTEPATGFIDGDLIESFLDISRPK	Q16531;B4DSA8;B4DZP5;Q16531-2	Q16531	DDB1	DNA damage-binding protein 1
0	1	10	1193.67	0.029995	56.013	853960	2	LEELHVIDVK	Q16531;F5GY55;B7Z2A1;F5GWI0;F5H2L3	Q16531	DDB1	DNA damage-binding protein 1
0	1	9	1082.61	9.3458e-06	153.08	18236000	3	LPSFELLHK	Q16531;F5GY55;B7Z2A1;B4DSA8;B4DZP5	Q16531	DDB1	DNA damage-binding protein 1
0	1	9	1032.6	0.030906	71.614	25043000	1	LVFSNVNLK	Q16531;F5GY55;B7Z2A1;B4DSA8;B4DZP5	Q16531	DDB1	DNA damage-binding protein 1
0	1	7	854.454	0.025104	90.777	12426000	1	LYDGLFK	Q16531;F5GY55;B7Z2A1;F5GWI0;F5H2L3;F5GZY8	Q16531	DDB1	DNA damage-binding protein 1
0	1	14	1479.71	0.00045896	118.52	17748000	2	QGQGQLVTCSGAFK	Q16531;F5GY55;B7Z2A1;B4DSA8;B7Z859	Q16531	DDB1	DNA damage-binding protein 1
2	0	20	2249.09	0.011933	70.334	1256600	1	SDPNRETDDTLVLSFVGQTR	Q16531;F5GY55;B7Z2A1;B4DSA8;B4DZP5;B7Z859	Q16531	DDB1	DNA damage-binding protein 1
1	0	11	1183.69	0.0039097	100.09	23062000	2	VTLGTQPTVLR	Q16531;F5GY55;B7Z2A1;B4DSA8;B4DZP5	Q16531	DDB1	DNA damage-binding protein 1
1	0	7	844.465	0.021999	94.114	9219200	1	VVEELTR	Q16531;B4DSA8;B4DZP5;Q16531-2	Q16531	DDB1	DNA damage-binding protein 1
0	1	10	1097.68	0.015441	79.474	13768000	2	YLAIAPPIIK	Q16531;F5GY55;B7Z2A1;B4DSA8	Q16531	DDB1	DNA damage-binding protein 1
0	1	9	1172.55	0.024038	75.387	1121100	1	YNACILEYK	Q16531;F5GY55;B7Z2A1;B4DSA8;F5GWI0;F5H2L3;F5GZY8;F5GYG8	Q16531	DDB1	DNA damage-binding protein 1
0	1	9	1023.49	0.0037408	107.21	32443000	2	DGLTDVYNK	P24752;H0YEL7	P24752	ACAT1	Acetyl-CoA acetyltransferase, mitochondrial
1	0	18	1876.87	2.706e-41	266.39	17584000	4	EAYMGNVLQGGEGQAPTR	P24752;P24752-2;H0YEL7;E9PRQ6	P24752	ACAT1	Acetyl-CoA acetyltransferase, mitochondrial
1	0	9	972.56	0.00017032	144.65	54386000	3	EVVIVSATR	P24752;P24752-2;E9PRQ6	P24752	ACAT1	Acetyl-CoA acetyltransferase, mitochondrial
0	1	13	1401.79	0.0036367	97.223	66615000	2	FGNEVIPVTVTVK	P24752	P24752	ACAT1	Acetyl-CoA acetyltransferase, mitochondrial
1	2	15	1789.88	0.040856	70.26	17480000	1	GQPDVVVKEDEEYKR	P24752	P24752	ACAT1	Acetyl-CoA acetyltransferase, mitochondrial
0	1	10	1087.65	9.9512e-05	142.36	34166000	2	IVGHLTHALK	P24752	P24752	ACAT1	Acetyl-CoA acetyltransferase, mitochondrial
0	1	12	1198.69	1.284e-05	142.39	88561000	4	LGSIAIQGAIEK	P24752;P24752-2;H0YEL7;E9PRQ6	P24752	ACAT1	Acetyl-CoA acetyltransferase, mitochondrial
1	0	8	882.529	0.0067742	106.68	59780000	2	LNVTPLAR	P24752	P24752	ACAT1	Acetyl-CoA acetyltransferase, mitochondrial
0	1	8	972.495	0.021313	82.279	19900000	2	MLEIDPQK	P24752	P24752	ACAT1	Acetyl-CoA acetyltransferase, mitochondrial
1	0	13	1543.69	1.3522e-39	266.77	26832000	2	NEQDAYAINSYTR	P24752	P24752	ACAT1	Acetyl-CoA acetyltransferase, mitochondrial
0	1	19	1940.04	4.743e-16	199.31	30648000	2	QAVLGAGLPISTPCTTINK	P24752;P24752-2;H0YEL7;E9PKF3	P24752	ACAT1	Acetyl-CoA acetyltransferase, mitochondrial
0	1	17	1700.97	4.0524e-21	220.64	54324000	4	TPIGSFLGSLSLLPATK	P24752;P24752-2;E9PRQ6	P24752	ACAT1	Acetyl-CoA acetyltransferase, mitochondrial
1	0	20	1905.98	0.0011292	79.88	51877000	2	VNINGGAVSLGHPIGMSGAR	P24752	P24752	ACAT1	Acetyl-CoA acetyltransferase, mitochondrial
1	0	20	2329.01	3.0411e-16	194.67	1227000000	30	AFVHWYVGEGMEEGEFSEAR	P68363;A8JZY9;B3KPS3;B3KT06;P68363-2;P68366-2;P68366;B4DDU2;B4DN58;Q15670;Q53GA7;Q9BQE3;F5H5D3;B7Z1K5;Q71U36;Q71U36-2;B4DQK4;Q1ZYQ1;Q13748;Q9UQM3	P68363	TUBA1B;TUBA4A;TUBA1C;TUBA1A;TUBA2;TUBA3C	Tubulin alpha-1B chain;Tubulin alpha-4A chain;Tubulin alpha-1C chain;Tubulin alpha-1A chain;Tubulin alpha-3C/D chain
1	1	28	3216.42	0.0017529	62.707	1272200	1	AFVHWYVGEGMEEGEFSEAREDMAALEK	P68363;A8JZY9;B3KPS3;B3KT06;P68363-2;P68366-2;P68366;B4DDU2;B4DN58;Q53GA7;Q9BQE3;F5H5D3;B7Z1K5;Q71U36;Q71U36-2;B4DQK4;Q9UQM3	P68363	TUBA1B;TUBA4A;TUBA1C;TUBA1A	Tubulin alpha-1B chain;Tubulin alpha-4A chain;Tubulin alpha-1C chain;Tubulin alpha-1A chain
1	0	17	1849.88	5.1458e-50	288.41	326410000	12	AVCMLSNTTAVAEAWAR	Q53GA7;Q9BQE3;F5H5D3;B7Z1K5;Q8N532	Q53GA7	TUBA1C	Tubulin alpha-1C chain
1	0	15	1700.9	3.7816e-40	266.35	4497900000	30	AVFVDLEPTVIDEVR	P68363;A8JZY9;B3KPS3;B3KT06;P68363-2;F8VVB9;B4DN58;F8VS66;F8VRZ4;F8VWV9;F8VX09;F8VRK0;Q53GA7;Q9BQE3;F5H5D3;B7Z1K5;Q8N532;Q71U36;Q71U36-2;F8VQQ4	P68363	TUBA1B;TUBA1C;TUBA1A	Tubulin alpha-1B chain;Tubulin alpha-1C chain;Tubulin alpha-1A chain
0	1	24	2763.3	5.1699e-48	271.42	408730000	12	AYHEQLTVAEITNACFEPANQMVK	Q53GA7;Q9BQE3;F5H5D3;B7Z1K5;Q8N532	Q53GA7	TUBA1C	Tubulin alpha-1C chain
0	1	10	1014.57	3.1802e-15	205.56	2948000000	15	DVNAAIATIK	P68363;A8JZY9;B3KPS3;B3KT06;P68363-2;B4DDU2;Q53GA7;Q9BQE3;F5H5D3;Q8N532;Q71U36;Q71U36-2;B4DQK4;Q1ZYQ1;Q13748;Q9UQM3;Q13748-2;Q6PEY2	P68363	TUBA1B;TUBA1C;TUBA1A;TUBA2;TUBA3C;TUBA3E	Tubulin alpha-1B chain;Tubulin alpha-1C chain;Tubulin alpha-1A chain;Tubulin alpha-3C/D chain;Tubulin alpha-3E chain
0	1	38	4295.95	4.0947e-05	62.647	135770000	3	ECISIHVGQAGVQIGNACWELYCLEHGIQPDGQMPSDK	P68363;A8JZY9;P68363-2;F8VVB9;B4DN58;F8VS66;F8W0F6;Q53GA7;Q9BQE3;F5H5D3;B7Z1K5;Q8N532;Q71U36;Q1ZYQ1;Q13748;Q13748-2;Q6PEY2	P68363	TUBA1B;TUBA1C;TUBA1A;TUBA2;TUBA3C;TUBA3E	Tubulin alpha-1B chain;Tubulin alpha-1C chain;Tubulin alpha-1A chain;Tubulin alpha-3C/D chain;Tubulin alpha-3E chain
0	1	8	905.416	0.00060345	141.52	1867400000	8	EDMAALEK	P68363;A8JZY9;B3KPS3;B3KT06;P68363-2;P68366-2;P68366;B4DDU2;B4DN58;Q53GA7;Q9BQE3;F5H5D3;B7Z1K5;Q71U36;Q71U36-2;B4DQK4;Q9UQM3	P68363	TUBA1B;TUBA4A;TUBA1C;TUBA1A	Tubulin alpha-1B chain;Tubulin alpha-4A chain;Tubulin alpha-1C chain;Tubulin alpha-1A chain
1	0	9	1084.61	1.0201e-23	240.13	4272300000	19	EIIDLVLDR	P68363;A8JZY9;B3KPS3;B3KT06;F8VVB9;F8VS66;F8VRZ4;Q53GA7;Q9BQE3;F5H5D3;B7Z1K5;Q8N532;Q71U36;Q71U36-2;B4DQK4;F8VQQ4	P68363	TUBA1B;TUBA1C;TUBA1A	Tubulin alpha-1B chain;Tubulin alpha-1C chain;Tubulin alpha-1A chain
1	0	21	2408.2	1.0706e-86	337.64	1001900000	20	FDGALNVDLTEFQTNLVPYPR	P68363;A8JZY9;B3KPS3;B3KT06;P68363-2;P68366-2;P68366;B4DDU2;F8VVB9;C9JDS9;Q53GA7;Q9BQE3;F5H5D3;B7Z1K5;Q71U36;Q71U36-2;B4DQK4;Q1ZYQ1;Q13748;Q9UQM3;Q13748-2;Q6PEY2	P68363	TUBA1B;TUBA4A;TUBA1C;TUBA1A;TUBA2;TUBA3C;TUBA3E	Tubulin alpha-1B chain;Tubulin alpha-4A chain;Tubulin alpha-1C chain;Tubulin alpha-1A chain;Tubulin alpha-3C/D chain;Tubulin alpha-3E chain
0	1	7	886.426	0.00072862	145.04	265630000	13	FDLMYAK	P68363;A8JZY9;B3KPS3;B3KT06;P68363-2;P68366-2;P68366;B4DDU2;B4DN58;Q15670;Q53GA7;Q9BQE3;F5H5D3;B7Z1K5;Q8N532;Q71U36;Q71U36-2;B4DQK4;Q1ZYQ1;Q13748;Q9UQM3;Q6PEY2;V9GZ17;A6NHL2-2;A6NHL2	P68363	TUBA1B;TUBA4A;TUBA1C;TUBA1A;TUBA2;TUBA3C;TUBA3E;TUBA8;TUBAL3	Tubulin alpha-1B chain;Tubulin alpha-4A chain;Tubulin alpha-1C chain;Tubulin alpha-1A chain;Tubulin alpha-3C/D chain;Tubulin alpha-3E chain;Tubulin alpha chain-like 3
0	1	7	774.402	0.027659	88.029	997540	1	GHYTIGK	P68363;A8JZY9;B3KPS3;B3KT06;P68366-2;P68366;F8VVB9;F8VS66;F8VRZ4;F8VWV9;Q6QMJ5;C9JEV8;C9JQ00;C9JJQ8;C9JDL2;Q53GA7;Q9BQE3;F5H5D3;B7Z1K5;Q8N532;Q71U36;Q71U36-2;B4DQK4;Q1ZYQ1;Q13748;Q13748-2;Q6PEY2;F8VQQ4	P68363	TUBA1B;TUBA4A;TUBA1C;TUBA1A;TUBA1;TUBA2;TUBA3C;TUBA3E	Tubulin alpha-1B chain;Tubulin alpha-4A chain;Tubulin alpha-1C chain;Tubulin alpha-1A chain;Tubulin alpha-3C/D chain;Tubulin alpha-3E chain
1	1	16	1841	0.020535	74.853	2708300	1	GHYTIGKEIIDLVLDR	P68363;A8JZY9;B3KPS3;B3KT06;F8VVB9;F8VS66;F8VRZ4;Q53GA7;Q9BQE3;F5H5D3;B7Z1K5;Q8N532;Q71U36;Q71U36-2;B4DQK4;F8VQQ4	P68363	TUBA1B;TUBA1C;TUBA1A	Tubulin alpha-1B chain;Tubulin alpha-1C chain;Tubulin alpha-1A chain
0	1	16	1755.96	1.8811e-27	238.65	3542300000	29	IHFPLATYAPVISAEK	P68363;B3KPS3;B3KT06;P68363-2;P68366-2;P68366;B4DDU2;F8VVB9;C9JDS9;Q53GA7;Q9BQE3;F5H5D3;B7Z1K5;Q71U36;Q71U36-2;B4DQK4;Q1ZYQ1;Q13748;Q9UQM3;Q13748-2;Q6PEY2	P68363	TUBA1B;TUBA4A;TUBA1C;TUBA1A;TUBA2;TUBA3C;TUBA3E	Tubulin alpha-1B chain;Tubulin alpha-4A chain;Tubulin alpha-1C chain;Tubulin alpha-1A chain;Tubulin alpha-3C/D chain;Tubulin alpha-3E chain
1	0	32	3389.62	5.7149e-11	140.55	337190000	14	LADQCTGLQGFLVFHSFGGGTGSGFTSLLMER	P68363;A8JZY9;B3KPS3;Q6QMJ5;Q53GA7;Q9BQE3;F5H5D3;B7Z1K5;Q71U36;Q71U36-2;B4DQK4;F8VQQ4	P68363	TUBA1B;TUBA1;TUBA1C;TUBA1A	Tubulin alpha-1B chain;Tubulin alpha-1C chain;Tubulin alpha-1A chain
0	2	11	1379.69	5.5807e-05	138.25	96612000	4	LDHKFDLMYAK	P68363;A8JZY9;B3KPS3;B3KT06;P68363-2;P68366-2;P68366;B4DDU2;B4DN58;Q15670;Q53GA7;Q9BQE3;F5H5D3;B7Z1K5;Q71U36;Q71U36-2;B4DQK4;Q1ZYQ1;Q13748;Q9UQM3;V9GZ17;A6NHL2-2;A6NHL2	P68363	TUBA1B;TUBA4A;TUBA1C;TUBA1A;TUBA2;TUBA3C;TUBA8;TUBAL3	Tubulin alpha-1B chain;Tubulin alpha-4A chain;Tubulin alpha-1C chain;Tubulin alpha-1A chain;Tubulin alpha-3C/D chain;Tubulin alpha chain-like 3
1	0	14	1486.87	1.4203e-48	278.36	1355500000	32	LISQIVSSITASLR	P68363;A8JZY9;B3KPS3;B3KT06;P68363-2;P68366-2;P68366;B4DDU2;F8VVB9;C9JDS9;Q9H853;Q53GA7;Q9BQE3;F5H5D3;B7Z1K5	P68363	TUBA1B;TUBA4A;TUBA4B;TUBA1C	Tubulin alpha-1B chain;Tubulin alpha-4A chain;Putative tubulin-like protein alpha-4B;Tubulin alpha-1C chain
0	1	7	780.402	0.0048676	129.68	802990000	3	LSVDYGK	P68363;A8JZY9;B3KPS3;B3KT06;P68366-2;P68366;B4DDU2;C9JDS9;C9JEV8;C9JQ00;C9JJQ8;D3DX41;Q53GA7;Q9BQE3;F5H5D3;B7Z1K5;Q71U36;Q71U36-2;B4DQK4;Q1ZYQ1;Q13748;Q9UQM3;Q13748-2;F8VQQ4	P68363	TUBA1B;TUBA4A;MGC16703;TUBA1C;TUBA1A;TUBA2;TUBA3C	Tubulin alpha-1B chain;Tubulin alpha-4A chain;Tubulin alpha-1C chain;Tubulin alpha-1A chain;Tubulin alpha-3C/D chain
1	1	40	4583.09	0.034705	14.54	23006000	1	MRECISIHVGQAGVQIGNACWELYCLEHGIQPDGQMPSDK	P68363;A8JZY9;P68363-2;F8VVB9;B4DN58;F8VS66;F8W0F6;Q53GA7;Q9BQE3;Q8N532;Q71U36;Q1ZYQ1;Q13748;Q13748-2;Q6PEY2	P68363	TUBA1B;TUBA1C;TUBA1A;TUBA2;TUBA3C;TUBA3E	Tubulin alpha-1B chain;Tubulin alpha-1C chain;Tubulin alpha-1A chain;Tubulin alpha-3C/D chain;Tubulin alpha-3E chain
2	0	14	1717.87	6.9953e-19	211.77	6366200000	18	NLDIERPTYTNLNR	P68363;A8JZY9;B3KPS3;B3KT06;P68366-2;P68366;B4DDU2;F8VVB9;C9JDS9;Q53GA7;Q9BQE3;F5H5D3;B7Z1K5;Q71U36;Q71U36-2;B4DQK4;Q1ZYQ1;Q13748;Q9UQM3;Q13748-2;Q6PEY2;F8VQQ4	P68363	TUBA1B;TUBA4A;TUBA1C;TUBA1A;TUBA2;TUBA3C;TUBA3E	Tubulin alpha-1B chain;Tubulin alpha-4A chain;Tubulin alpha-1C chain;Tubulin alpha-1A chain;Tubulin alpha-3C/D chain;Tubulin alpha-3E chain
1	0	8	977.493	1.0057e-08	186.76	225970000	5	PTYTNLNR	P68363;A8JZY9;B3KPS3;B3KT06;P68366-2;P68366;B4DDU2;F8VVB9;C9JDS9;Q9H853;Q53GA7;Q9BQE3;F5H5D3;B7Z1K5;Q71U36;Q71U36-2;B4DQK4;Q1ZYQ1;Q13748;Q9UQM3;Q13748-2;Q6PEY2;F8VQQ4	P68363	TUBA1B;TUBA4A;TUBA4B;TUBA1C;TUBA1A;TUBA2;TUBA3C;TUBA3E	Tubulin alpha-1B chain;Tubulin alpha-4A chain;Putative tubulin-like protein alpha-4B;Tubulin alpha-1C chain;Tubulin alpha-1A chain;Tubulin alpha-3C/D chain;Tubulin alpha-3E chain
0	1	12	1409.77	1.1686e-18	212.68	3832600000	19	QLFHPEQLITGK	P68363;A8JZY9;B3KPS3;B3KT06;P68363-2;P68366-2;P68366;F8VVB9;F8VS66;F8VRZ4;F8VWV9;F8VX09;Q6QMJ5;C9JEV8;C9JQ00;C9JJQ8;C9JDL2;C9K0S6;Q53GA7;Q9BQE3;F5H5D3;B7Z1K5;Q8N532;Q71U36;Q71U36-2;Q1ZYQ1;Q13748;Q13748-2;Q6PEY2;F8VQQ4	P68363	TUBA1B;TUBA4A;TUBA1C;TUBA1A;TUBA1;TUBA8;TUBA2;TUBA3C;TUBA3E	Tubulin alpha-1B chain;Tubulin alpha-4A chain;Tubulin alpha-1C chain;Tubulin alpha-1A chain;Tubulin alpha-3C/D chain;Tubulin alpha-3E chain
1	1	21	2414.2	0.00010182	105.92	152260000	6	QLFHPEQLITGKEDAANNYAR	P68363;A8JZY9;B3KPS3;B3KT06;P68363-2;P68366-2;P68366;F8VVB9;F8VS66;F8VRZ4;F8VWV9;F8VX09;Q6QMJ5;C9JEV8;C9JQ00;C9JJQ8;C9JDL2;C9K0S6;Q53GA7;Q9BQE3;F5H5D3;B7Z1K5;Q8N532;Q71U36;Q71U36-2;Q1ZYQ1;Q13748;Q13748-2;F8VQQ4	P68363	TUBA1B;TUBA4A;TUBA1C;TUBA1A;TUBA1;TUBA8;TUBA2;TUBA3C	Tubulin alpha-1B chain;Tubulin alpha-4A chain;Tubulin alpha-1C chain;Tubulin alpha-1A chain;Tubulin alpha-3C/D chain
3	0	15	1873.98	0.00045027	124.47	103020000	2	RNLDIERPTYTNLNR	P68363;A8JZY9;B3KPS3;B3KT06;P68366-2;P68366;B4DDU2;F8VVB9;C9JDS9;Q53GA7;Q9BQE3;F5H5D3;B7Z1K5;Q71U36;Q71U36-2;B4DQK4;Q1ZYQ1;Q13748;Q9UQM3;Q13748-2;Q6PEY2;F8VQQ4	P68363	TUBA1B;TUBA4A;TUBA1C;TUBA1A;TUBA2;TUBA3C;TUBA3E	Tubulin alpha-1B chain;Tubulin alpha-4A chain;Tubulin alpha-1C chain;Tubulin alpha-1A chain;Tubulin alpha-3C/D chain;Tubulin alpha-3E chain
1	1	14	1753.86	0.001541	106.55	14086000	3	RTIQFVDWCPTGFK	Q53GA7;Q9BQE3;F5H5D3;B7Z1K5;Q8N532;Q71U36;Q71U36-2;B4DQK4;Q1ZYQ1;Q13748;Q9UQM3;Q13748-2;Q6PEY2;V9GZ17	Q53GA7	TUBA1C;TUBA1A;TUBA2;TUBA3C;TUBA3E;TUBA8	Tubulin alpha-1C chain;Tubulin alpha-1A chain;Tubulin alpha-3C/D chain;Tubulin alpha-3E chain
0	1	20	2006.89	1.0465e-110	365.02	2514100000	24	TIGGGDDSFNTFFSETGAGK	P68363;A8JZY9;B3KPS3;B3KT06;P68363-2;F8VVB9;B4DN58;F8VS66;F8VRZ4;F8VWV9;F8VX09;F8W0F6;F8VRK0;F8VXZ7;Q53GA7;Q9BQE3;F5H5D3;B7Z1K5;Q8N532;Q71U36;Q71U36-2;Q1ZYQ1;Q13748;Q13748-2;Q6PEY2;F8VQQ4	P68363	TUBA1B;TUBA1C;TUBA1A;TUBA2;TUBA3C;TUBA3E	Tubulin alpha-1B chain;Tubulin alpha-1C chain;Tubulin alpha-1A chain;Tubulin alpha-3C/D chain;Tubulin alpha-3E chain
0	1	13	1597.76	5.4182e-32	244.71	1098500000	22	TIQFVDWCPTGFK	Q53GA7;Q9BQE3;F5H5D3;B7Z1K5;Q8N532;Q71U36;Q71U36-2;B4DQK4;Q1ZYQ1;Q13748;Q9UQM3;Q13748-2;Q6PEY2;V9GZ17	Q53GA7	TUBA1C;TUBA1A;TUBA2;TUBA3C;TUBA3E;TUBA8	Tubulin alpha-1C chain;Tubulin alpha-1A chain;Tubulin alpha-3C/D chain;Tubulin alpha-3E chain
0	1	18	1823.98	1.8953e-15	198.67	3633300000	17	VGINYQPPTVVPGGDLAK	P68363;A8JZY9;B3KPS3;B3KT06;P68363-2;P68366-2;P68366;B4DDU2;B4DN58;Q53GA7;Q9BQE3;F5H5D3;B7Z1K5;Q8N532;Q71U36;Q71U36-2;B4DQK4;Q1ZYQ1;Q13748;Q9UQM3;Q13748-2;Q6PEY2;V9GZ17	P68363	TUBA1B;TUBA4A;TUBA1C;TUBA1A;TUBA2;TUBA3C;TUBA3E;TUBA8	Tubulin alpha-1B chain;Tubulin alpha-4A chain;Tubulin alpha-1C chain;Tubulin alpha-1A chain;Tubulin alpha-3C/D chain;Tubulin alpha-3E chain
1	0	9	1248.55	1.9408e-07	172.14	2286900000	14	YMACCLLYR	P68363;A8JZY9;B3KPS3;B3KT06;P68363-2;P68366-2;P68366;B4DDU2;Q53GA7;Q9BQE3;F5H5D3;B7Z1K5;Q8N532;Q71U36;Q71U36-2;B4DQK4;Q9UQM3;A6NHL2-2;A6NHL2	P68363	TUBA1B;TUBA4A;TUBA1C;TUBA1A;TUBAL3	Tubulin alpha-1B chain;Tubulin alpha-4A chain;Tubulin alpha-1C chain;Tubulin alpha-1A chain;Tubulin alpha chain-like 3
0	1	12	1298.64	5.725e-20	220.66	21034000	3	GEVTYTTSQVSK	Q5T9B9;A8K2X4;A0A024R878;P17813-2;P17813	Q5T9B9	ENG	Endoglin
1	0	18	1894.02	1.0698e-15	200.71	10987000	2	GPITSAAELNDPQSILLR	Q5T9B9;A8K2X4;A0A024R878;P17813-2;P17813;Q96CG0	Q5T9B9	ENG	Endoglin
1	0	13	1365.73	6.9559e-08	151.99	15054000	2	LPDTPQGLLGEAR	Q5T9B9;A8K2X4;A0A024R878;P17813-2;P17813;Q96CG0;B4DYI8;F5GX88;B7Z6Y5	Q5T9B9	ENG	Endoglin
1	0	10	1215.62	0.0044705	100.02	8463100	1	TQILEWAAER	Q5T9B9;A8K2X4;A0A024R878;P17813-2;P17813;Q96CG0	Q5T9B9	ENG	Endoglin
1	0	32	3451.73	0.0072876	49.095	5925000	1	VSPSVSEFLLQLDSCHLDLGPEGGTVELIQGR	Q5T9B9;A8K2X4;A0A024R878;P17813-2;P17813;Q96CG0;B4DYI8;F5GX88;B7Z6Y5;B4DTC8	Q5T9B9	ENG	Endoglin
1	0	8	829.502	0.0051092	111.74	19073000	2	ALLSAVTR	P26232-2;P26232-5;P26232;P26232-3;P35221;P35221-2;B4DKT9;G3XAM7;B4E2G8;B4DU00;E5RJ41;E5RIB1;E5RG03;E5RGY6	P35221	CTNNA2;CTNNA1	Catenin alpha-2;Catenin alpha-1
2	0	8	1032.54	0.0025125	124.92	16878000	2	FRPSLEER	P26232-2;P26232-5;P26232;P26232-3;P35221;P35221-2;B4DKT9;G3XAM7;B4E2G8;B4DU00;H0YBB8	P35221	CTNNA2;CTNNA1	Catenin alpha-2;Catenin alpha-1
0	1	12	1377.68	4.3574e-06	147.7	9065400	2	IAEQVASFQEEK	P35221;P35221-2;B4DKT9;G3XAM7;B4E2G8;B4DU00;P35221-3	P35221	CTNNA1	Catenin alpha-1
1	0	9	1030.52	0.027958	73.233	2893100	1	IVAECNAVR	P26232-2;P26232-5;P26232;P26232-3;Q49AD3;P35221;P35221-2;B4DKT9;G3XAM7;B4E2G8;B4DU00;B3KSR8;H0YBB8	P35221	CTNNA2;CTNNA1	Catenin alpha-2;Catenin alpha-1
0	1	19	2059.03	0.0082746	75.334	384350	1	LIEVANLACSISNNEEGVK	P35221;P35221-2;B4DKT9;G3XAM7;B4E2G8;B4DU00;B3KSR8;P35221-3;E5RFM5;E5RJP7;E5RGD2;E5RFG3;E5RFK9	P35221	CTNNA1	Catenin alpha-1
0	1	12	1363.74	0.0093744	102.97	6484200	1	LLILADMADVYK	P35221;P35221-2;B4DKT9;G3XAM7;B4DU00;E5RJ41;E5RIB1;E5RG03	P35221	CTNNA1	Catenin alpha-1
0	2	27	2809.48	4.3331e-05	108.13	8312600	1	MSASQLEALCPQVINAALALAAKPQSK	P35221;P35221-2;B4DKT9;G3XAM7;B4E2G8;B3KSR8;P35221-3;E5RFM5;E5RJP7;E5RGD2	P35221	CTNNA1	Catenin alpha-1
0	1	13	1448.69	0.043568	62.528	740740	1	NAGNEQDLGIQYK	P35221;P35221-2;B4DKT9;G3XAM7;B4E2G8;B4DU00;E5RJ41;E5RIB1	P35221	CTNNA1	Catenin alpha-1
0	1	11	1215.66	0.012447	103.44	18267000	0	NLMNAVVQTVK	P35221;P35221-2;B4DKT9;B4E2G8;B4DU00;B3KSR8;P35221-3;E5RGY7;A8K141;Q9UI47	P35221	CTNNA1;CTNNA3	Catenin alpha-1;Catenin alpha-3
0	1	22	2458.23	0.038606	40.315	8731800	1	NVPILYTASQACLQHPDVAAYK	P35221;P35221-2;B4DKT9;G3XAM7;B4E2G8;B4DU00;E5RJ41	P35221	CTNNA1	Catenin alpha-1
1	0	16	1764.85	0.024727	71.354	309420	1	QALQDLLSEYMGNAGR	P35221;P35221-2;B4DKT9;G3XAM7;B4E2G8;B4DU00;B3KSR8	P35221	CTNNA1	Catenin alpha-1
1	0	9	1118.61	2.2002e-05	153.97	7908200	4	QDLLAYLQR	P26232-2;P26232-5;P26232;Q49AD3;F6KRI5;A0A0A0MRI5;P26232-4;P26232-6;B7Z259;P35221;P35221-2;B4DKT9;G3XAM7;B4E2G8;B4DU00;B3KSR8;P35221-3	P35221	CTNNA2;CTNNA1	Catenin alpha-2;Catenin alpha-1
1	0	13	1531.79	0.0011418	122.66	4036200	0	QIIVDPLSFSEER	P35221;P35221-2;B4DKT9;G3XAM7;B4E2G8;B4DU00;H0YBB8	P35221	CTNNA1	Catenin alpha-1
0	1	11	1170.61	5.23e-05	143.24	17264000	4	TAVHAGNINFK	P35221;P35221-2;G3XAM7;B4E2G8;E5RIB1;E5RG03;E5RGY6;E5RJZ2;E5RIT8;E5RFM3;E5RJL0;E5RIE0;E5RHV7	P35221	CTNNA1	Catenin alpha-1
1	0	17	1817.88	1.4173e-07	157.83	655920	1	TSVQTEDDQLIAGQSAR	P26232-2;P26232-5;P26232;P26232-3;Q49AD3;F6KRI5;A0A0A0MRI5;P26232-4;P26232-6;A0A0A0MTJ6;P35221;P35221-2;B4DKT9;G3XAM7;B4E2G8;B4DU00;B3KSR8;P35221-3	P35221	CTNNA2;CTNNA1	Catenin alpha-2;Catenin alpha-1
2	1	16	1920.93	0.006728	99.991	0	0	AICENKNGNPHRENLR	W0UV28;P03950	W0UV28	RAA1;ANG	Angiogenin
2	0	10	1343.56	2.3111e-07	172.21	2213900000	17	DDRYCESIMR	W0UV28;P03950	W0UV28	RAA1;ANG	Angiogenin
0	1	10	1157.58	3.6846e-06	160.77	6807800000	13	DINTFIHGNK	W0UV28;P03950	W0UV28	RAA1;ANG	Angiogenin
1	1	11	1313.68	1.0042e-27	248.98	6251800000	18	DINTFIHGNKR	W0UV28;P03950	W0UV28	RAA1;ANG	Angiogenin
0	2	17	1900.95	0.014238	76.574	6332100	1	GLTSPCKDINTFIHGNK	W0UV28;P03950	W0UV28	RAA1;ANG	Angiogenin
1	0	13	1553.72	4.876e-33	255.41	1329100000	24	LHGGSPWPPCQYR	W0UV28;P03950	W0UV28	RAA1;ANG	Angiogenin
1	0	20	2266.15	2.1933e-83	332.29	5258400000	13	NVVVACENGLPVHLDQSIFR	W0UV28;P03950	W0UV28	RAA1;ANG	Angiogenin
2	0	22	2519.31	0.022206	61.096	2715300	1	NVVVACENGLPVHLDQSIFRRP	W0UV28;P03950	W0UV28	RAA1;ANG	Angiogenin
0	1	9	1056.49	1.6133e-05	157.75	731260000	6	SSFQVTTCK	W0UV28;P03950	W0UV28	RAA1;ANG	Angiogenin
1	0	7	957.405	0.0046166	133.81	2236500000	11	YCESIMR	W0UV28;P03950	W0UV28	RAA1;ANG	Angiogenin
0	1	12	1522.72	1.7711e-30	248.19	2112800000	18	YTHFLTQHYDAK	W0UV28;P03950	W0UV28	RAA1;ANG	Angiogenin
1	1	16	1960.95	7.9141e-40	268.18	18755000000	60	YTHFLTQHYDAKPQGR	W0UV28;P03950	W0UV28	RAA1;ANG	Angiogenin
2	1	19	2347.11	0.0095817	61.186	1154600	1	YTHFLTQHYDAKPQGRDDR	W0UV28;P03950	W0UV28	RAA1;ANG	Angiogenin
1	0	10	1057.6	3.7691e-05	147.75	59570000	4	AAGVVLEMIR	Q9Y230;B3KNL2;Q9Y230-2;M0R0Y3;B4DW30;X6R2L4;M0QXI6	Q9Y230	RUVBL2	RuvB-like 2
1	0	16	1730.87	1.5867e-19	210.08	18648000	1	ALESDMAPVLIMATNR	Q9Y230;B3KNL2;Q9Y230-2;M0R0Y3	Q9Y230	RUVBL2	RuvB-like 2
0	1	12	1110.64	0.0031325	101.72	66375000	2	AVLIAGQPGTGK	Q9Y230;B3KNL2;Q9Y230-2;M0R0Y3;B4DW30;X6R2L4;M0QXI6	Q9Y230	RUVBL2	RuvB-like 2
0	2	13	1400.75	1.3207e-24	222.56	12737000	1	DKVQAGDVITIDK	Q9Y230;B3KNL2;Q9Y230-2;M0R0Y3;B4DW30	Q9Y230	RUVBL2	RuvB-like 2
0	1	10	1114.46	0.014989	80.245	8190900	1	DYDAMGSQTK	Q9Y230;B3KNL2;Q9Y230-2;M0R0Y3	Q9Y230	RUVBL2	RuvB-like 2
1	0	17	1946.02	0.0029958	85.28	27410000	2	EVVHTVSLHEIDVINSR	Q9Y230;B3KNL2;Q9Y230-2;M0R0Y3	Q9Y230	RUVBL2	RuvB-like 2
0	1	12	1515.72	1.9725e-24	234.87	9388400	2	EYQDAFLFNELK	Q9Y230;B3KNL2;Q9Y230-2	Q9Y230	RUVBL2	RuvB-like 2
0	1	19	2236.98	0.0057004	97.384	909530	1	EYQDAFLFNELKGETMDTS	Q9Y230;B3KNL2;Q9Y230-2	Q9Y230	RUVBL2	RuvB-like 2
0	1	11	1319.62	7.6017e-07	160.67	38065000	3	FVQCPDGELQK	Q9Y230;B3KNL2;Q9Y230-2;M0R0Y3	Q9Y230	RUVBL2	RuvB-like 2
1	0	11	1154.59	6.345e-05	135.8	53058000	3	GLGLDDALEPR	Q9Y230;B4DW30;X6R2L4;M0R0Z0	Q9Y230	RUVBL2	RuvB-like 2
1	1	11	1258.65	0.00013887	137.01	35896000	4	GTEVQVDDIKR	Q9Y230;B3KNL2;Q9Y230-2	Q9Y230	RUVBL2	RuvB-like 2
1	0	17	1867.94	0.0020476	91.657	42199000	1	GTSYQSPHGIPIDLLDR	Q9Y230;B3KNL2;Q9Y230-2;M0R0Y3	Q9Y230	RUVBL2	RuvB-like 2
1	0	8	887.508	0.0039756	115.49	3841300	1	IGLETSLR	Q9Y230;B3KNL2;Q9Y230-2	Q9Y230	RUVBL2	RuvB-like 2
1	2	12	1386.75	7.1342e-08	164.48	26460000	3	KGTEVQVDDIKR	Q9Y230;B3KNL2;Q9Y230-2	Q9Y230	RUVBL2	RuvB-like 2
0	1	12	1349.74	7.1328e-14	189.24	86935000	3	LLIVSTTPYSEK	Q9Y230;B3KNL2;Q9Y230-2;M0R0Y3	Q9Y230	RUVBL2	RuvB-like 2
0	1	7	820.436	0.032643	82.671	16217000	1	MIESLTK	Q9Y230;B3KNL2;Q9Y230-2;M0R0Y3;B4DW30;X6R2L4	Q9Y230	RUVBL2	RuvB-like 2
1	0	13	1315.67	5.8974e-26	234.87	60903000	3	QASQGMVGQLAAR	Q9Y230;B4DW30;X6R2L4	Q9Y230	RUVBL2	RuvB-like 2
2	0	11	1213.7	0.0027807	99.283	531900	1	RAAGVVLEMIR	Q9Y230;B3KNL2;Q9Y230-2;M0R0Y3;B4DW30;X6R2L4;M0QXI6	Q9Y230	RUVBL2	RuvB-like 2
1	0	9	1035.53	0.0080657	93.667	29491000	3	TEALTQAFR	Q9Y230;B3KNL2;Q9Y230-2;M0R0Y3;B4DW30;X6R2L4;M0QXI6	Q9Y230	RUVBL2	RuvB-like 2
0	1	16	1682.85	4.9267e-20	217.65	32898000	5	TQGFLALFSGDTGEIK	Q9Y230;B3KNL2;Q9Y230-2;M0R0Y3	Q9Y230	RUVBL2	RuvB-like 2
0	1	13	1500.7	1.8673e-25	226.42	39350000	3	TTEMETIYDLGTK	Q9Y230;B3KNL2;Q9Y230-2;M0R0Y3;B4DW30;X6R2L4	Q9Y230	RUVBL2	RuvB-like 2
1	0	10	1227.61	0.0035341	104.43	7440900	1	VYSLFLDESR	Q9Y230;B3KNL2;Q9Y230-2	Q9Y230	RUVBL2	RuvB-like 2
1	0	14	1577.86	1.6522e-14	188.92	831720	1	YAIQLITAASLVCR	Q9Y230;B3KNL2;Q9Y230-2	Q9Y230	RUVBL2	RuvB-like 2
1	0	8	1035.5	0.040691	70.816	9738500	1	DIYQDLNR	P43246;P43246-2;V9H019;Q53GS1;Q53FK0;E9PHA6;Q53RU4;B4DSB9;B4DN49;A0A087X078;V9H068;A0A087X1E7;V9H023;V9H0D5;V9H0B2;V9H015;V9H062;Q0ZAJ2;A5JTV3	P43246	MSH2	DNA mismatch repair protein Msh2
0	1	8	813.423	0.03023	76.064	715250	1	DLGLDPGK	P43246;P43246-2;V9H019;Q53GS1;Q53FK0;E9PHA6;Q53RU4;B4DSB9;B4DN49;A0A087X078;V9H068;B4DL39	P43246	MSH2	DNA mismatch repair protein Msh2
0	1	9	1200.55	0.030906	71.614	9407200	2	ENDWYLAYK	P43246;P43246-2;V9H019;Q53GS1;Q53FK0;E9PHA6;Q53RU4;A0A087X078;V9H068;A0A087X1E7;V9H023;V9H0D5;V9H0B2;V9H015;V9H062;Q0ZAJ2;C9J809	P43246	MSH2	DNA mismatch repair protein Msh2
1	1	14	1637.82	0.038302	66.708	42631000	1	FFQGMPEKPTTTVR	P43246;V9H019;Q53GS1;Q53FK0;E9PHA6;Q53RU4;B4DN49;A0A087X078;V9H068;A0A087X1E7;V9H023;V9H0D5;V9H0B2;V9H015;V9H062	P43246	MSH2	DNA mismatch repair protein Msh2
1	0	8	857.497	0.026905	77.732	29755000	1	GGILITER	P43246;P43246-2;V9H019;Q53GS1;Q53FK0;E9PHA6;Q53RU4;B4DSB9;B4DN49;A0A087X078;V9H068;A0A087X1E7;V9H023;V9H0D5;V9H0B2;V9H015;V9H062	P43246	MSH2	DNA mismatch repair protein Msh2
1	0	17	1854.92	0.020536	57.288	188960	1	GVSTFMAEMLETASILR	P43246;P43246-2;V9H019;Q53GS1;Q53FK0;E9PHA6;B4DSB9;B4DN49;B4DL39	P43246	MSH2	DNA mismatch repair protein Msh2
0	1	8	976.559	0.0076533	104.01	34408000	2	IIQEFLSK	P43246;P43246-2;B4DSB9;B4DN49;B4DL39	P43246	MSH2	DNA mismatch repair protein Msh2
1	0	7	756.449	0.025104	90.777	23384000	2	LDIAAVR	P43246;P43246-2;V9H019;Q53GS1;Q53FK0;E9PHA6;Q53RU4;B4DN49;A0A087X078;V9H068;B4DL39;A0A087X1E7;V9H023;V9H0D5;V9H0B2;V9H015	P43246	MSH2	DNA mismatch repair protein Msh2
1	0	12	1452.67	0.0074996	91.202	816800	1	LDSSAQFGYYFR	P43246;P43246-2;V9H019;Q53GS1;Q53FK0;E9PHA6;Q53RU4;B4DSB9;B4DN49;A0A087X078;V9H068;B4DL39	P43246	MSH2	DNA mismatch repair protein Msh2
1	0	14	1569.95	0.0032916	101.45	10502000	1	LLLAVFVTPLTDLR	P43246;P43246-2;V9H019;Q53GS1;Q53FK0;E9PHA6;Q53RU4;B4DSB9;A0A087X078;V9H068;B4DL39;A0A087X1E7;V9H023	P43246	MSH2	DNA mismatch repair protein Msh2
1	0	14	1616.84	7.8643e-12	184.87	11369000	2	LNLVEAFVEDAELR	P43246;P43246-2;V9H019;Q53GS1;Q53FK0;E9PHA6;Q53RU4;B4DSB9;A0A087X078;V9H068;B4DL39;A0A087X1E7;V9H023;V9H0D5;V9H0B2;Q0ZAJ1	P43246	MSH2	DNA mismatch repair protein Msh2
0	1	10	1196.59	0.0147	80.737	11979000	1	LTSLNEEYTK	P43246;P43246-2;V9H019;Q53GS1;Q53FK0;E9PHA6;Q53RU4;B4DSB9;B4DN49;B4DL39	P43246	MSH2	DNA mismatch repair protein Msh2
0	1	17	1940.07	1.6559e-14	186.96	5136800	2	LYQGINQLPNVIQALEK	P43246;P43246-2;V9H019;Q53GS1;Q53FK0;E9PHA6;Q53RU4;B4DSB9;B4DN49;A0A087X078;V9H068;B4DL39;A0A087X1E7;V9H023;V9H0D5	P43246	MSH2	DNA mismatch repair protein Msh2
1	0	10	1076.56	0.003978	117.14	0	1	MQSTLISAAR	P43246;P43246-2;V9H019;Q53GS1;Q53FK0;E9PHA6;Q53RU4;B4DSB9;B4DN49;A0A087X078;V9H068;B4DL39;Q0ZAI9;Q0ZAJ0	P43246	MSH2	DNA mismatch repair protein Msh2
0	1	9	986.576	0.00071574	129.88	21692000	3	NLQSVVLSK	P43246;P43246-2;V9H019;Q53GS1;Q53FK0;E9PHA6;Q53RU4;A0A087X078;V9H068;A0A087X1E7;V9H023;V9H0D5;V9H0B2;V9H015;V9H062;Q0ZAJ2;C9J809	P43246	MSH2	DNA mismatch repair protein Msh2
1	0	11	1291.65	0.0024674	107.17	1516200	1	NNSFVNEIISR	P43246;P43246-2;B4DSB9;B4DN49;B4DL39	P43246	MSH2	DNA mismatch repair protein Msh2
1	0	10	1237.55	0.043296	63.473	11032000	1	QAANLQDCYR	P43246;P43246-2;V9H019;Q53GS1;Q53FK0;E9PHA6;Q53RU4;B4DSB9;B4DN49;A0A087X078;V9H068;B4DL39;A0A087X1E7;V9H023;V9H0D5;Q0ZAJ1	P43246	MSH2	DNA mismatch repair protein Msh2
0	1	12	1394.66	0.0075635	91.093	1585800	1	TEYEEAQDAIVK	P43246;P43246-2;V9H019;Q53GS1;Q53FK0;E9PHA6;Q53RU4;B4DSB9;B4DN49;B4DL39	P43246	MSH2	DNA mismatch repair protein Msh2
1	0	18	1890.98	3.7688e-27	237.59	12129000	1	AFTGFIVEADTPGIQIGR	B7Z9I1;B4DWX6;A0A0S2Z366;Q5T4U5;Q5HYG7;P11310;P11310-2;B4DVB1;A0A0S2Z3A5;B4DJE7;B4DVE0	B7Z9I1	ACADM;DKFZp686M24262	Medium-chain specific acyl-CoA dehydrogenase, mitochondrial
1	0	9	1152.61	2.559e-10	190.73	7274200	2	ANWYFLLAR	B7Z9I1;B4DWX6;A0A0S2Z366;Q5T4U5;Q5HYG7;P11310;P11310-2;B4DVB1;A0A0S2Z3A5;B4DJE7;B4DVE0	B7Z9I1	ACADM;DKFZp686M24262	Medium-chain specific acyl-CoA dehydrogenase, mitochondrial
0	1	12	1375.69	0.0035543	99.5	5790500	1	EEIIPVAAEYDK	B7Z9I1;B4DWX6;A0A0S2Z366;Q5T4U5;Q5HYG7;P11310;P11310-2;E9PJM9;E9PRX4	B7Z9I1	ACADM;DKFZp686M24262	Medium-chain specific acyl-CoA dehydrogenase, mitochondrial
0	1	12	1218.62	0.00042927	120.87	22655000	3	ENVLIGDGAGFK	B7Z9I1;B4DWX6;A0A0S2Z366;Q5T4U5;Q5HYG7;P11310;P11310-2;B4DVB1;A0A0S2Z3A5;B4DJE7;B4DVE0	B7Z9I1	ACADM;DKFZp686M24262	Medium-chain specific acyl-CoA dehydrogenase, mitochondrial
0	1	8	905.486	0.043118	69.598	12217000	1	GIVFEDVK	B7Z9I1;B4DWX6;A0A0S2Z366;Q5T4U5;Q5HYG7;P11310;P11310-2;B4DVB1;A0A0S2Z3A5;B4DJE7;B4DVE0	B7Z9I1	ACADM;DKFZp686M24262	Medium-chain specific acyl-CoA dehydrogenase, mitochondrial
1	0	13	1597.81	2.4121e-25	222.81	11661000	2	IYQIYEGTSQIQR	B7Z9I1;B4DWX6;A0A0S2Z366;Q5T4U5;Q5HYG7;P11310;P11310-2;B4DVB1;B4DJE7	B7Z9I1	ACADM;DKFZp686M24262	Medium-chain specific acyl-CoA dehydrogenase, mitochondrial
0	2	11	1263.65	1.6164e-16	215.08	8066500	1	KGDEYIINGQK	B7Z9I1;B4DWX6;A0A0S2Z366;Q5T4U5;Q5HYG7;P11310;P11310-2;B4DVB1;A0A0S2Z3A5;B4DVE0	B7Z9I1	ACADM;DKFZp686M24262	Medium-chain specific acyl-CoA dehydrogenase, mitochondrial
1	0	10	1143.63	0.018569	77.662	2745900	1	TGEYPVPLIR	B7Z9I1;B4DWX6;A0A0S2Z366;Q5T4U5;Q5HYG7;P11310;P11310-2;E9PJM9	B7Z9I1	ACADM;DKFZp686M24262	Medium-chain specific acyl-CoA dehydrogenase, mitochondrial
2	0	15	1464.85	0.00046542	121.18	58389000	3	TRPVVAAGAVGLAQR	B7Z9I1;B4DWX6;A0A0S2Z366;Q5T4U5;Q5HYG7;P11310;P11310-2;B4DVB1;A0A0S2Z3A5;B4DJE7;B4DVE0;H0YDT5	B7Z9I1	ACADM;DKFZp686M24262	Medium-chain specific acyl-CoA dehydrogenase, mitochondrial
1	0	15	1614.83	1.4676e-32	251.68	1701000000	20	AILVDLEPGTMDSVR	Q5JP53;Q5SU16;P07437;B7ZAF0;Q6LC01;B4DY90;B4DMJ5;Q13509;Q9BV28;Q53G92;B2RBD5;A0A0B4J269;G3V5W4;G3V2R8;G3V3R4;G3V2N6;Q13885;B2R6L0;A5D907;A5D906	Q5JP53	TUBB;TUBB3;TUBB2A	Tubulin beta chain;Tubulin beta-3 chain;Tubulin beta-2A chain
0	1	15	1658.89	5.4473e-49	285.81	1427600000	20	ALTVPELTQQVFDAK	Q5JP53;Q5SU16;P07437;B7ZAF0;B4DY90;Q5ST81;B7ZAK1;Q9BUU9;B4E052;B4DQN9;Q96B85;B4DXZ5;B4DMU8;Q1KSF8	Q5JP53	TUBB;XTP3TPATP1	Tubulin beta chain
0	1	12	1445.68	6.9271e-56	307.97	1567300000	22	EVDEQMLNVQNK	Q5JP53;Q5SU16;P07437;B7ZAF0;Q6LC01;B4DY90;Q5ST81;B7ZAK1;Q9BUU9;B4E052;B4DQN9;Q96B85;B4DXZ5;B4DMU8;Q1KSF8;B4DMJ5;Q6P602;Q8IZ29;P68371;Q8N6N5;Q8IWP6;B3KML9;Q96HX0;A4UCT2;Q13885;B2R6L0	Q8IZ29	TUBB;XTP3TPATP1;TUBB2C;TUBB4B;TUBB2A	Tubulin beta chain;Tubulin beta-4B chain;Tubulin beta-2A chain
0	2	26	3123.5	0.030689	74.364	0	0	EVDEQMLNVQNKNSSYFVEWIPNNVK	Q5JP53;Q5SU16;P07437;B7ZAF0;Q6LC01;B4DY90;Q5ST81;B7ZAK1;Q9BUU9;B4E052;B4DQN9;Q96B85;B4DXZ5;B4DMJ5;Q6P602;Q8IZ29;P68371;Q8N6N5;Q8IWP6;B3KML9;Q96HX0;A4UCT2;Q13885;B2R6L0	Q8IZ29	TUBB;TUBB2C;TUBB4B;TUBB2A	Tubulin beta chain;Tubulin beta-4B chain;Tubulin beta-2A chain
1	0	10	1129.59	6.0966e-07	166.86	2837600000	28	FPGQLNADLR	P04350;B4DE77;B4DJ43;M0R2D3;Q5JP53;Q5SU16;P07437;B7ZAF0;Q6LC01;B4DY90;Q5ST81;B7ZAK1;Q9BUU9;B4E052;B4DQN9;Q96B85;B4DXZ5;B4DMU8;Q1KSF8;Q8IZ29;P68371;Q8N6N5;Q8IWP6;B3KML9;Q96HX0;Q13509;Q9BV28;Q53G92;B2RBD5;A0A0B4J269;Q13509-2;Q3ZCR3;G3V2A3;Q13885;B2R6L0;A5D907;A5D906;A6NNZ2;Q3ZCM7;A0A075B736;Q5SQY0;Q9BUF5;B3KS31;B4DP54;K7ESM5;B4E386	Q8IZ29	TUBB4A;TUBB;XTP3TPATP1;TUBB2C;TUBB4B;TUBB3;TUBB2A;TUBB8;TUBB6	Tubulin beta-4A chain;Tubulin beta chain;Tubulin beta-4B chain;Tubulin beta-3 chain;Tubulin beta-2A chain;Tubulin beta-8 chain-like protein LOC260334;Tubulin beta-8 chain;Tubulin beta-6 chain
1	1	11	1257.68	0.00014411	136.49	257030000	11	FPGQLNADLRK	P04350;B4DE77;B4DJ43;M0R2D3;Q5JP53;Q5SU16;P07437;B7ZAF0;Q6LC01;B4DY90;Q5ST81;B7ZAK1;Q9BUU9;B4E052;B4DQN9;Q96B85;B4DXZ5;B4DMU8;Q1KSF8;Q8IZ29;P68371;Q8N6N5;Q8IWP6;B3KML9;Q96HX0;Q13509;Q9BV28;Q53G92;B2RBD5;A0A0B4J269;Q13509-2;Q3ZCR3;G3V2A3;Q13885;B2R6L0;A5D907;A5D906;A6NNZ2;Q3ZCM7;A0A075B736;Q5SQY0;Q9BUF5;B3KS31;B4DP54;K7ESM5;B4E386	Q8IZ29	TUBB4A;TUBB;XTP3TPATP1;TUBB2C;TUBB4B;TUBB3;TUBB2A;TUBB8;TUBB6	Tubulin beta-4A chain;Tubulin beta chain;Tubulin beta-4B chain;Tubulin beta-3 chain;Tubulin beta-2A chain;Tubulin beta-8 chain-like protein LOC260334;Tubulin beta-8 chain;Tubulin beta-6 chain
1	0	27	3101.4	3.6747e-29	208.72	1185500000	14	FWEVISDEHGIDPTGTYHGDSDLQLDR	Q5JP53;Q5SU16;P07437;Q6LC01;B4DY90;B4DMU8;B4DMJ5	Q5JP53	TUBB	Tubulin beta chain
1	0	18	1957.97	2.9565e-83	342.97	4299900000	26	GHYTEGAELVDSVLDVVR	Q5JP53;Q5SU16;P07437;B7ZAF0;Q6LC01;Q5ST81;B7ZAK1;B4DMJ5;Q8IZ29;P68371;Q8N6N5;Q8IWP6;Q13509;Q9BV28;Q53G92;B2RBD5;A0A0B4J269;Q13509-2;Q3ZCR3;G3V2A3;Q13885;B2R6L0;A5D907;A5D906	Q8IZ29	TUBB;TUBB2C;TUBB4B;TUBB3;TUBB2A	Tubulin beta chain;Tubulin beta-4B chain;Tubulin beta-3 chain;Tubulin beta-2A chain
1	1	19	2086.07	2.7928e-09	166.67	97910000	3	GHYTEGAELVDSVLDVVRK	Q5JP53;Q5SU16;P07437;B7ZAF0;Q6LC01;Q5ST81;B7ZAK1;B4DMJ5;Q8IZ29;P68371;Q8N6N5;Q8IWP6;Q13509;Q9BV28;Q53G92;B2RBD5;A0A0B4J269;Q13509-2;Q3ZCR3;G3V2A3;Q13885;B2R6L0;A5D907;A5D906	Q8IZ29	TUBB;TUBB2C;TUBB4B;TUBB3;TUBB2A	Tubulin beta chain;Tubulin beta-4B chain;Tubulin beta-3 chain;Tubulin beta-2A chain
0	1	12	1318.7	9.0304e-46	276.12	3767100000	30	IMNTFSVVPSPK	P04350;B4DE77;M0R2D3;M0QYM7;M0R042;Q5JP53;Q5SU16;P07437;B7ZAF0;Q6LC01;B4DY90;Q5ST81;B7ZAK1;Q9BUU9;B4E052;B4DQN9;Q1KSF8;Q8IZ29;P68371;Q8N6N5;Q8IWP6;B3KML9;Q13509;Q9BV28;Q53G92;B2RBD5;A0A0B4J269;Q13509-2;Q3ZCR3;G3V2A3	Q8IZ29	TUBB4A;TUBB;XTP3TPATP1;TUBB2C;TUBB4B;TUBB3	Tubulin beta-4A chain;Tubulin beta chain;Tubulin beta-4B chain;Tubulin beta-3 chain
2	0	8	1076.53	0.031591	104.01	0	1	IREEYPDR	Q5JP53;Q5SU16;P07437;B7ZAF0;Q6LC01;B4DY90;Q5ST81;B7ZAK1;Q9BUU9;B4E052;B4DQN9;Q1KSF8;Q8IZ29;P68371;Q8N6N5;Q8IWP6;B3KML9;Q13885;B2R6L0;A5D907;A5D906;A6NNZ2;Q3ZCM7;A0A075B736;Q5SQY0	Q8IZ29	TUBB;XTP3TPATP1;TUBB2C;TUBB4B;TUBB2A;TUBB8	Tubulin beta chain;Tubulin beta-4B chain;Tubulin beta-2A chain;Tubulin beta-8 chain-like protein LOC260334;Tubulin beta-8 chain
1	0	10	1228.59	2.884e-41	289.22	3085200000	23	ISEQFTAMFR	P04350;B4DE77;B4DJ43;B4DFH6;Q5JP53;Q5SU16;P07437;B7ZAF0;Q6LC01;B4DY90;Q5ST81;B7ZAK1;Q9BUU9;B4E052;B4DQN9;Q96B85;B4DXZ5;B4DMU8;B4DMJ5;Q6P602;A4UCU2;Q8IZ29;P68371;Q8N6N5;Q8IWP6;B3KML9;Q96HX0;Q13509;Q9BV28;Q53G92;B2RBD5;A0A0B4J269;Q13509-2;Q13885;B2R6L0	Q8IZ29	TUBB4A;TUBB;TUBB2C;TUBB4B;TUBB3;TUBB2A	Tubulin beta-4A chain;Tubulin beta chain;Tubulin beta-4B chain;Tubulin beta-3 chain;Tubulin beta-2A chain
0	1	12	1300.63	4.8173e-46	283.47	1375500000	12	ISVYYNEATGGK	Q5JP53;Q5SU16;P07437;B7ZAF0;Q6LC01;B4DY90;B4DMU8;B4DMJ5	Q5JP53	TUBB	Tubulin beta chain
1	1	11	1270.72	0.0061434	106.62	31382000	1	KLAVNMVPFPR	P04350;B4DE77;B4DJ43;B4DFH6;Q5JP53;Q5SU16;P07437;B7ZAF0;Q6LC01;B4DY90;Q5ST81;Q9BUU9;B4E052;B4DQN9;Q96B85;B4DXZ5;B4DMU8;Q1KSF8;Q8IZ29;P68371;Q8N6N5;Q8IWP6;B3KML9;Q96HX0;Q13509;Q9BV28;Q53G92;B2RBD5;A0A0B4J269;Q13509-2;Q3ZCR3;Q13885;B2R6L0;A6NNZ2;Q3ZCM7;A0A075B736;Q5SQY0;Q9BUF5;B3KS31;B4DP54;K7ESM5;B4E386	Q8IZ29	TUBB4A;TUBB;XTP3TPATP1;TUBB2C;TUBB4B;TUBB3;TUBB2A;TUBB8;TUBB6	Tubulin beta-4A chain;Tubulin beta chain;Tubulin beta-4B chain;Tubulin beta-3 chain;Tubulin beta-2A chain;Tubulin beta-8 chain-like protein LOC260334;Tubulin beta-8 chain;Tubulin beta-6 chain
1	0	10	1142.63	9.2193e-12	199.46	5643900000	45	LAVNMVPFPR	P04350;B4DE77;B4DJ43;B4DFH6;Q5JP53;Q5SU16;P07437;B7ZAF0;Q6LC01;B4DY90;Q5ST81;Q9BUU9;B4E052;B4DQN9;Q96B85;B4DXZ5;B4DMU8;Q1KSF8;Q8IZ29;P68371;Q8N6N5;Q8IWP6;B3KML9;Q96HX0;Q13509;Q9BV28;Q53G92;B2RBD5;A0A0B4J269;Q13509-2;Q3ZCR3;Q13885;B2R6L0;A6NNZ2;Q3ZCM7;A0A075B736;Q5SQY0;Q9BUF5;B3KS31;B4DP54;K7ESM5;B4E386	Q8IZ29	TUBB4A;TUBB;XTP3TPATP1;TUBB2C;TUBB4B;TUBB3;TUBB2A;TUBB8;TUBB6	Tubulin beta-4A chain;Tubulin beta chain;Tubulin beta-4B chain;Tubulin beta-3 chain;Tubulin beta-2A chain;Tubulin beta-8 chain-like protein LOC260334;Tubulin beta-8 chain;Tubulin beta-6 chain
1	0	14	1619.83	4.0635e-06	142.83	4852700000	44	LHFFMPGFAPLTSR	P04350;B4DE77;B4DJ43;B4DFH6;I0CMK4;Q5JP53;Q5SU16;P07437;B7ZAF0;Q6LC01;B4DY90;Q5ST81;B7ZAK1;Q9BUU9;B4E052;B4DQN9;Q96B85;B4DXZ5;B4DMU8;Q1KSF8;Q8IZ29;P68371;Q8N6N5;Q8IWP6;B3KML9;Q96HX0;Q13885;B2R6L0;A6NNZ2;Q3ZCM7;A0A075B736;Q5SQY0;Q9BUF5;B3KS31;B4DP54;K7ESM5;B4E386	Q8IZ29	TUBB4A;TUBB4Q;TUBB;XTP3TPATP1;TUBB2C;TUBB4B;TUBB2A;TUBB8;TUBB6	Tubulin beta-4A chain;Tubulin beta chain;Tubulin beta-4B chain;Tubulin beta-2A chain;Tubulin beta-8 chain-like protein LOC260334;Tubulin beta-8 chain;Tubulin beta-6 chain
1	0	25	2707.33	3.6707e-32	232.57	3194800000	28	LTTPTYGDLNHLVSATMSGVTTCLR	P04350;B4DE77;M0R2D3;Q5JP53;Q5SU16;P07437;B7ZAF0;B4DY90;Q5ST81;B7ZAK1;Q9BUU9;B4E052;B4DQN9;Q96B85;B4DXZ5;B4DMU8;Q1KSF8;Q8IZ29;P68371;Q8IWP6;Q13885;B2R6L0;A5D907;A5D906	Q8IZ29	TUBB4A;TUBB;XTP3TPATP1;TUBB2C;TUBB4B;TUBB2A	Tubulin beta-4A chain;Tubulin beta chain;Tubulin beta-4B chain;Tubulin beta-2A chain
0	1	17	1868.97	5.506e-170	444.65	950450000	27	MAVTFIGNSTAIQELFK	Q5JP53;Q5SU16;P07437;B7ZAF0;Q6LC01;B4DY90;Q5ST81;B7ZAK1;Q9BUU9;B4E052;B4DQN9;Q96B85;B4DXZ5;B4DMU8;B4DMJ5;Q6P602;A4UCU2	Q5JP53	TUBB	Tubulin beta chain
1	1	18	2025.07	0.0036868	82.529	517590	1	MAVTFIGNSTAIQELFKR	Q5JP53;Q5SU16;P07437;B7ZAF0;Q6LC01;B4DY90;Q5ST81;B7ZAK1;Q9BUU9;B4E052;B4DQN9;Q96B85;B4DXZ5;B4DMU8;B4DMJ5;Q6P602;A4UCU2	Q5JP53	TUBB	Tubulin beta chain
0	2	16	1922.89	0.00018586	123.1	2677600	3	MSMKEVDEQMLNVQNK	Q5JP53;Q5SU16;P07437;B7ZAF0;Q6LC01;B4DY90;Q5ST81;B7ZAK1;Q9BUU9;B4E052;B4DQN9;Q96B85;B4DXZ5;B4DMU8;Q1KSF8;Q6P602;Q8IZ29;P68371;Q8N6N5;Q8IWP6;B3KML9;Q96HX0;A4UCT2;Q13885;B2R6L0	Q8IZ29	TUBB;XTP3TPATP1;TUBB2C;TUBB4B;TUBB2A	Tubulin beta chain;Tubulin beta-4B chain;Tubulin beta-2A chain
1	0	9	1064.42	2.7749e-06	166.34	1076000000	25	NMMAACDPR	P04350;B4DE77;B4DJ43;B4DFH6;Q5JP53;Q5SU16;P07437;B7ZAF0;Q6LC01;B4DY90;Q5ST81;B7ZAK1;Q9BUU9;B4E052;B4DQN9;Q96B85;B4DXZ5;B4DMU8;Q1KSF8;Q8IZ29;P68371;Q8N6N5;Q8IWP6;B3KML9;Q96HX0;A4UCT2;Q13509;Q9BV28;Q53G92;B2RBD5;A0A0B4J269;Q13509-2;Q3ZCR3;Q13885;B2R6L0;A6NNZ2;Q3ZCM7;A0A075B736;Q5SQY0;Q9BUF5;B3KS31;B4DP54;K7ESM5;B4E386	Q8IZ29	TUBB4A;TUBB;XTP3TPATP1;TUBB2C;TUBB4B;TUBB3;TUBB2A;TUBB8;TUBB6	Tubulin beta-4A chain;Tubulin beta chain;Tubulin beta-4B chain;Tubulin beta-3 chain;Tubulin beta-2A chain;Tubulin beta-8 chain-like protein LOC260334;Tubulin beta-8 chain;Tubulin beta-6 chain
0	1	14	1695.83	5.3944e-49	286.74	3316800000	21	NSSYFVEWIPNNVK	P04350;B4DE77;B4DJ43;B4DFH6;Q5JP53;Q5SU16;P07437;B7ZAF0;Q6LC01;B4DY90;Q5ST81;B7ZAK1;Q9BUU9;B4E052;B4DQN9;Q96B85;B4DXZ5;B4DMJ5;Q6P602;Q8IZ29;P68371;Q8N6N5;Q8IWP6;B3KML9;Q96HX0;A4UCT2;Q13509;Q9BV28;B2RBD5;A0A0B4J269;Q13509-2;Q13885;B2R6L0;Q9BUF5;B3KS31;B4DP54;K7ESM5;B4E386	Q8IZ29	TUBB4A;TUBB;TUBB2C;TUBB4B;TUBB3;TUBB2A;TUBB6	Tubulin beta-4A chain;Tubulin beta chain;Tubulin beta-4B chain;Tubulin beta-3 chain;Tubulin beta-2A chain;Tubulin beta-6 chain
2	0	11	1384.69	0.021532	89.44	19768000	1	RISEQFTAMFR	P04350;B4DE77;B4DJ43;B4DFH6;Q5JP53;Q5SU16;P07437;B7ZAF0;Q6LC01;B4DY90;Q5ST81;B7ZAK1;Q9BUU9;B4E052;B4DQN9;Q96B85;B4DXZ5;B4DMU8;B4DMJ5;Q6P602;A4UCU2;Q8IZ29;P68371;Q8N6N5;Q8IWP6;B3KML9;Q96HX0;Q13509;Q9BV28;Q53G92;B2RBD5;A0A0B4J269;Q13509-2;Q13885;B2R6L0	Q8IZ29	TUBB4A;TUBB;TUBB2C;TUBB4B;TUBB3;TUBB2A	Tubulin beta-4A chain;Tubulin beta chain;Tubulin beta-4B chain;Tubulin beta-3 chain;Tubulin beta-2A chain
1	1	26	2797.34	2.9797e-68	298.09	3270100000	22	SGPFGQIFRPDNFVFGQSGAGNNWAK	P04350;B4DE77;B4DJ43;M0R278;M0QY85;M0QZL7;M0R1I1;Q5JP53;Q5SU16;P07437;B7ZAF0;Q6LC01;B4DY90;Q5ST81;B7ZAK1;B4DQN9;B4DMJ5;Q8IZ29;P68371;Q8N6N5;Q8IWP6;Q13885;B2R6L0;A5D907;A5D906	Q8IZ29	TUBB4A;TUBB;TUBB2C;TUBB4B;TUBB2A	Tubulin beta-4A chain;Tubulin beta chain;Tubulin beta-4B chain;Tubulin beta-2A chain
1	0	9	1027.51	0.00021141	143.03	315500000	40	TAVCDIPPR	P04350;B4DE77;B4DJ43;B4DFH6;Q5JP53;Q5SU16;P07437;B7ZAF0;Q6LC01;B4DY90;Q5ST81;B7ZAK1;Q9BUU9;B4E052;B4DQN9;Q96B85;B4DXZ5;B4DMU8;B4DMJ5;Q6P602;Q8IZ29;P68371;Q8N6N5;Q8IWP6;B3KML9;Q96HX0;A4UCT2;Q13885;B2R6L0;A6NNZ2;Q3ZCM7;A0A075B736;Q5SQY0	Q8IZ29	TUBB4A;TUBB;TUBB2C;TUBB4B;TUBB2A;TUBB8	Tubulin beta-4A chain;Tubulin beta chain;Tubulin beta-4B chain;Tubulin beta-2A chain;Tubulin beta-8 chain-like protein LOC260334;Tubulin beta-8 chain
1	0	39	4592.1	0.018597	33.762	4888800	7	VSDTVVEPYNATLSVHQLVENTDETYCIDNEALYDICFR	P04350;B4DE77;M0R2D3;M0QYM7;M0R042;Q5JP53;Q5SU16;P07437;B7ZAF0;Q6LC01;B4DY90;Q5ST81;B7ZAK1;Q9BUU9;B4E052;B4DQN9;Q1KSF8;Q8IZ29;P68371;Q8N6N5;Q8IWP6;B3KML9;Q9BUF5;B3KS31;B4DP54;K7ESM5;B4E386	Q8IZ29	TUBB4A;TUBB;XTP3TPATP1;TUBB2C;TUBB4B;TUBB6	Tubulin beta-4A chain;Tubulin beta chain;Tubulin beta-4B chain;Tubulin beta-6 chain
1	0	9	1038.59	2.3723e-18	224.36	2303500000	14	YLTVAAVFR	P04350;B4DE77;B4DJ43;B4DFH6;Q5JP53;Q5SU16;P07437;B7ZAF0;Q6LC01;B4DY90;Q5ST81;B7ZAK1;Q9BUU9;B4E052;Q96B85;B4DXZ5;B4DMU8;Q1KSF8;Q8IZ29;P68371;Q8N6N5;Q8IWP6;B3KML9;Q96HX0;A4UCT2	Q8IZ29	TUBB4A;TUBB;XTP3TPATP1;TUBB2C;TUBB4B	Tubulin beta-4A chain;Tubulin beta chain;Tubulin beta-4B chain
1	0	12	1275.62	1.8016e-07	155.66	21308000	4	ASAPISQWSSSR	D6Q1S4;H0YDV5;Q8N699	D6Q1S4	MYCT1	Myc target protein 1
1	0	12	1346.66	1.6767e-07	156.52	21892000	2	QASLEQANSFPR	D6Q1S4;H0YDV5;Q8N699	D6Q1S4	MYCT1	Myc target protein 1
1	0	12	1335.71	3.859e-14	195.72	19126000	3	SNLSLASLTFQR	D6Q1S4;H0YDV5;Q8N699	D6Q1S4	MYCT1	Myc target protein 1
0	1	16	1667.91	0.019504	74.853	9911900	1	VGLSTPPPPAYESIIK	D6Q1S4;H0YDV5;Q8N699	D6Q1S4	MYCT1	Myc target protein 1
0	1	8	945.59	0.002376	124.98	15233000	3	ALLIFLEK	Q9NPQ8-2;Q9NPQ8-4;Q9NPQ8;Q9NPQ8-3;H0YEN0	Q9NPQ8-2	RIC8A	Synembryn-A
1	0	9	913.498	0.015761	80.916	24602000	2	ASINPVTGR	Q9NPQ8-2;Q9NPQ8-4;Q9NPQ8;Q9NPQ8-3;H0YE35;H0YC88	Q9NPQ8-2	RIC8A	Synembryn-A
1	0	15	1629.84	0.029355	70.272	887570	1	ESVAPVLSVLTECAR	Q9NPQ8-2;Q9NPQ8-4;Q9NPQ8;Q9NPQ8-3;H0YEN0	Q9NPQ8-2	RIC8A	Synembryn-A
1	0	9	1058.69	0.018803	78.264	82952	1	LLFLLTALR	Q9NPQ8-2;Q9NPQ8-4;Q9NPQ8;Q9NPQ8-3;H0YEN0;E9PSI0	Q9NPQ8-2	RIC8A	Synembryn-A
1	0	8	999.587	0.0097538	97.635	1506100	1	VIWLQSVR	Q9NPQ8-2;Q9NPQ8-4;Q9NPQ8;Q9NPQ8-3;E9PSI0	Q9NPQ8-2	RIC8A	Synembryn-A
1	0	14	1396.71	7.8688e-41	272.59	24647000	3	YTGYGNAAGLLAAR	Q9NPQ8-2;Q9NPQ8-4;Q9NPQ8;Q9NPQ8-3;H0YE35;A0A024RBG9;B7WPL0;Q9NVN3-4;Q9NVN3-3;Q9NVN3;Q9NVN3-1	Q9NPQ8-2	RIC8A;RIC8B	Synembryn-A;Synembryn-B
0	1	14	1610.79	0.034283	51.092	9913400	2	AHEILPNLVCCSAK	Q53HU0;P50990;P50990-2;Q7Z759;P50990-3;H7C4C8	Q53HU0	CCT8	T-complex protein 1 subunit theta
0	1	15	1371.74	4.1277e-40	265.64	76908000	4	AIADTGANVVVTGGK	Q53HU0;P50990;P50990-2;Q7Z759;P50990-3;H7C4C8	Q53HU0	CCT8	T-complex protein 1 subunit theta
0	1	9	961.506	6.0079e-05	148.99	56758000	2	APGFAQMLK	Q53HU0;P50990	Q53HU0	CCT8	T-complex protein 1 subunit theta
0	1	10	1064.51	0.0075462	92.943	56093000	2	AVDDGVNTFK	Q53HU0;P50990;P50990-2;Q7Z759;P50990-3	Q53HU0	CCT8	T-complex protein 1 subunit theta
1	0	10	1145.59	4.0442e-08	172.98	35362000	4	DIDEVSSLLR	Q53HU0;P50990;P50990-2;Q7Z759;P50990-3;H7C4C8	Q53HU0	CCT8	T-complex protein 1 subunit theta
0	1	14	1537.77	1.7309e-19	208.68	24430000	5	DMLEAGILDTYLGK	Q53HU0;P50990;P50990-2;Q7Z759;P50990-3;H7C2U0	Q53HU0	CCT8	T-complex protein 1 subunit theta
1	0	11	1172.64	0.031907	69.815	20147000	1	EDGAISTIVLR	Q53HU0;P50990;P50990-2;Q7Z759;P50990-3	Q53HU0	CCT8	T-complex protein 1 subunit theta
0	1	10	1120.59	3.6923e-06	160.75	3830000	2	ELEVQHPAAK	Q53HU0;P50990;P50990-2;Q7Z759;H7C4C8	Q53HU0	CCT8	T-complex protein 1 subunit theta
1	0	10	1149.58	3.6166e-09	167.93	53137000	4	FAEAFEAIPR	Q53HU0;P50990;P50990-2;Q7Z759;P50990-3	Q53HU0	CCT8	T-complex protein 1 subunit theta
0	1	11	1232.57	0.0033221	102.97	13098000	2	GEENLMDAQVK	Q53HU0;P50990;P50990-2;Q7Z759;P50990-3;H7C4C8	Q53HU0	CCT8	T-complex protein 1 subunit theta
1	0	12	1364.59	9.4574e-06	144.51	32568000	2	GSTDNLMDDIER	Q53HU0;P50990;P50990-2;Q7Z759;P50990-3	Q53HU0	CCT8	T-complex protein 1 subunit theta
1	1	14	1566.84	0.044739	63.062	21508000	1	HEKEDGAISTIVLR	Q53HU0;P50990;P50990-2;Q7Z759;P50990-3	Q53HU0	CCT8	T-complex protein 1 subunit theta
1	0	11	1306.63	0.0039097	100.09	65056000	3	HFSGLEEAVYR	Q53HU0;P50990;P50990-2;H7C4C8	Q53HU0	CCT8	T-complex protein 1 subunit theta
0	1	16	1830.85	1.2503e-32	249.41	34844000	4	IAVYSCPFDGMITETK	Q53HU0;P50990;P50990-2;Q7Z759;P50990-3	Q53HU0	CCT8	T-complex protein 1 subunit theta
1	0	17	1893.95	0.017895	83.751	5358500	0	IGLSVSEVIEGYEIACR	Q53HU0;P50990;P50990-2;Q7Z759;P50990-3;H7C4C8	Q53HU0	CCT8	T-complex protein 1 subunit theta
0	1	18	1817.97	0.00049054	104.94	64570000	3	ILGSGISSSSVLHGMVFK	Q53HU0;P50990;P50990-2;Q7Z759;P50990-3	Q53HU0	CCT8	T-complex protein 1 subunit theta
1	0	11	1127.67	1.5551e-16	207.34	123880000	5	LATNAAVTVLR	Q53HU0;P50990;P50990-2;Q7Z759;P50990-3;H7C2U0	Q53HU0	CCT8	T-complex protein 1 subunit theta
1	0	12	1332.74	7.8902e-11	182.23	3728700	2	LFVTNDAATILR	Q53HU0;P50990;P50990-2;Q7Z759;H7C4C8	Q53HU0	CCT8	T-complex protein 1 subunit theta
0	1	14	1353.75	0.025133	73.415	38223000	1	LVPGGGATEIELAK	Q53HU0;P50990;P50990-2;Q7Z759;P50990-3	Q53HU0	CCT8	T-complex protein 1 subunit theta
0	1	8	982.527	0.0018471	128.12	70492000	4	MVINHLEK	Q53HU0;P50990;P50990-2;Q7Z759;H7C4C8	Q53HU0	CCT8	T-complex protein 1 subunit theta
0	1	14	1452.78	5.057e-16	202.92	23466000	1	NVGLDIEAEVPAVK	Q53HU0;P50990;P50990-2;Q7Z759;P50990-3;H7C2U0	Q53HU0	CCT8	T-complex protein 1 subunit theta
0	2	11	991.545	0.032225	70.552	507870	1	PAGGPKPPSGK	Q53HU0;P50990;P50990-2;Q7Z759;P50990-3;H7C2U0	Q53HU0	CCT8	T-complex protein 1 subunit theta
0	1	18	2056.98	5.3362e-26	222.09	18981000	3	QITSYGETCPGLEQYAIK	Q53HU0;P50990;P50990-2;Q7Z759;P50990-3	Q53HU0	CCT8	T-complex protein 1 subunit theta
0	1	10	1167.59	0.0077834	92.538	31646000	1	QYGNEVFLAK	Q53HU0;P50990;P50990-2;Q7Z759;P50990-3;H7C4C8	Q53HU0	CCT8	T-complex protein 1 subunit theta
0	1	10	1168.54	0.0037466	103.43	22309000	2	TAEELMNFSK	Q53HU0;P50990;P50990-2;Q7Z759;P50990-3;H7C4C8	Q53HU0	CCT8	T-complex protein 1 subunit theta
1	0	9	884.508	0.00082903	128.6	86361000	3	TVGATALPR	Q53HU0;P50990;P50990-2;Q7Z759;P50990-3;H7C4C8	Q53HU0	CCT8	T-complex protein 1 subunit theta
0	1	11	1231.6	3.7501e-05	141.89	54936000	3	VADMALHYANK	Q53HU0;P50990;P50990-2;Q7Z759;P50990-3;H7C4C8	Q53HU0	CCT8	T-complex protein 1 subunit theta
1	0	7	907.495	0.006726	124.34	48489000	3	YNIMLVR	Q53HU0;P50990;P50990-2;Q7Z759;P50990-3;H7C4C8	Q53HU0	CCT8	T-complex protein 1 subunit theta
1	0	15	1572.78	1.8859e-25	232.13	522130000	8	AALVDLEPGTMDSVR	Q9BUF5;B4DP54;K7EL29;K7EN98;K7ESQ3;K7EQT3;K7EJ64;K7ERA8;K7EJZ4;K7EPE5	Q9BUF5	TUBB6	Tubulin beta-6 chain
1	0	15	1718.87	5.1593e-81	338.78	643580000	22	ALTVPELTQQMFDAR	Q9BUF5;B3KS31;B4DP54;K7ESM5;B4E386	Q9BUF5	TUBB6	Tubulin beta-6 chain
0	1	32	3449.55	1.6543e-06	103.88	34573000	2	ECEHCDCLQGFQLTHSLGGGTGSGMGTLLISK	Q9BUF5;B3KS31;K7ESM5;K7ES63	Q9BUF5	TUBB6	Tubulin beta-6 chain
0	1	17	1851.93	2.4487e-59	297.55	725040000	13	EIVHIQAGQCGNQIGTK	Q9BUF5;B4DP54;K7ESM5;K7EL29;K7EN98;K7ESQ3;K7EQT3;K7EJ64;K7ERA8;K7EJZ4;K7EPE5	Q9BUF5	TUBB6	Tubulin beta-6 chain
0	1	12	1389.68	3.5338e-77	343.75	817860000	17	EVDEQMLAIQSK	Q13509;Q9BV28;Q53G92;B2RBD5;A0A0B4J269;Q13509-2;Q3ZCR3;Q9BUF5;B3KS31;B4DP54;K7ESM5;B4E386	Q9BUF5	TUBB3;TUBB6	Tubulin beta-3 chain;Tubulin beta-6 chain
1	0	10	1129.59	6.0966e-07	166.86	2837600000	28	FPGQLNADLR	P04350;B4DE77;B4DJ43;M0R2D3;Q5JP53;Q5SU16;P07437;B7ZAF0;Q6LC01;B4DY90;Q5ST81;B7ZAK1;Q9BUU9;B4E052;B4DQN9;Q96B85;B4DXZ5;B4DMU8;Q1KSF8;Q8IZ29;P68371;Q8N6N5;Q8IWP6;B3KML9;Q96HX0;Q13509;Q9BV28;Q53G92;B2RBD5;A0A0B4J269;Q13509-2;Q3ZCR3;G3V2A3;Q13885;B2R6L0;A5D907;A5D906;A6NNZ2;Q3ZCM7;A0A075B736;Q5SQY0;Q9BUF5;B3KS31;B4DP54;K7ESM5;B4E386	Q8IZ29	TUBB4A;TUBB;XTP3TPATP1;TUBB2C;TUBB4B;TUBB3;TUBB2A;TUBB8;TUBB6	Tubulin beta-4A chain;Tubulin beta chain;Tubulin beta-4B chain;Tubulin beta-3 chain;Tubulin beta-2A chain;Tubulin beta-8 chain-like protein LOC260334;Tubulin beta-8 chain;Tubulin beta-6 chain
1	1	11	1257.68	0.00014411	136.49	257030000	11	FPGQLNADLRK	P04350;B4DE77;B4DJ43;M0R2D3;Q5JP53;Q5SU16;P07437;B7ZAF0;Q6LC01;B4DY90;Q5ST81;B7ZAK1;Q9BUU9;B4E052;B4DQN9;Q96B85;B4DXZ5;B4DMU8;Q1KSF8;Q8IZ29;P68371;Q8N6N5;Q8IWP6;B3KML9;Q96HX0;Q13509;Q9BV28;Q53G92;B2RBD5;A0A0B4J269;Q13509-2;Q3ZCR3;G3V2A3;Q13885;B2R6L0;A5D907;A5D906;A6NNZ2;Q3ZCM7;A0A075B736;Q5SQY0;Q9BUF5;B3KS31;B4DP54;K7ESM5;B4E386	Q8IZ29	TUBB4A;TUBB;XTP3TPATP1;TUBB2C;TUBB4B;TUBB3;TUBB2A;TUBB8;TUBB6	Tubulin beta-4A chain;Tubulin beta chain;Tubulin beta-4B chain;Tubulin beta-3 chain;Tubulin beta-2A chain;Tubulin beta-8 chain-like protein LOC260334;Tubulin beta-8 chain;Tubulin beta-6 chain
1	0	27	2959.4	9.8345e-31	220.74	514550000	10	FWEVISDEHGIDPAGGYVGDSALQLER	Q9BUF5;B4DP54;K7ESM5;K7EL29;K7EN98;K7ESQ3;K7EQT3;K7EJ64;K7ERA8;K7EJZ4;K7EPE5	Q9BUF5	TUBB6	Tubulin beta-6 chain
1	0	18	1941.98	7.3211e-50	276.14	789980000	18	GHYTEGAELVDAVLDVVR	P04350;B4DE77;B4DJ43;M0R278;M0R1I1;Q9BUF5;B3KS31;K7ESM5;K7EL29;K7ES63	Q9BUF5	TUBB4A;TUBB6	Tubulin beta-4A chain;Tubulin beta-6 chain
1	1	19	2070.07	0.037639	53.504	1619200	1	GHYTEGAELVDAVLDVVRK	P04350;B4DE77;B4DJ43;M0R278;M0R1I1;Q9BUF5;B3KS31;K7ESM5;K7EL29;K7ES63	Q9BUF5	TUBB4A;TUBB6	Tubulin beta-4A chain;Tubulin beta-6 chain
0	1	12	1350.67	2.9924e-30	242.48	493710000	18	IMNTFSVMPSPK	Q13885;B2R6L0;A5D907;A5D906;Q9BUF5;B3KS31;B4DP54;K7ESM5;B4E386;K7ES63	Q9BUF5	TUBB2A;TUBB6	Tubulin beta-2A chain;Tubulin beta-6 chain
0	1	12	1430.67	3.3481e-38	270.93	699640000	9	INVYYNESSSQK	Q9BUF5;B4DP54;K7EL29;K7EN98;K7ESQ3;K7EQT3;K7EJ64;K7ERA8;K7EJZ4;K7EPE5	Q9BUF5	TUBB6	Tubulin beta-6 chain
2	0	8	1060.53	0.012505	125.31	322050000	4	IREEFPDR	P04350;B4DE77;M0QYM7;M0R042;Q9BUF5;B3KS31;B4DP54;K7ESM5;B4E386;K7ES63	Q9BUF5	TUBB4A;TUBB6	Tubulin beta-4A chain;Tubulin beta-6 chain
1	0	10	1214.58	1.8875e-15	211.86	692570000	13	ISEQFSAMFR	Q9BUF5;B3KS31;B4DP54;B4E386	Q9BUF5	TUBB6	Tubulin beta-6 chain
0	2	33	3577.64	0.010893	47.827	12968000	2	KECEHCDCLQGFQLTHSLGGGTGSGMGTLLISK	Q9BUF5;B3KS31;K7ESM5;K7ES63	Q9BUF5	TUBB6	Tubulin beta-6 chain
1	1	11	1270.72	0.0061434	106.62	31382000	1	KLAVNMVPFPR	P04350;B4DE77;B4DJ43;B4DFH6;Q5JP53;Q5SU16;P07437;B7ZAF0;Q6LC01;B4DY90;Q5ST81;Q9BUU9;B4E052;B4DQN9;Q96B85;B4DXZ5;B4DMU8;Q1KSF8;Q8IZ29;P68371;Q8N6N5;Q8IWP6;B3KML9;Q96HX0;Q13509;Q9BV28;Q53G92;B2RBD5;A0A0B4J269;Q13509-2;Q3ZCR3;Q13885;B2R6L0;A6NNZ2;Q3ZCM7;A0A075B736;Q5SQY0;Q9BUF5;B3KS31;B4DP54;K7ESM5;B4E386	Q8IZ29	TUBB4A;TUBB;XTP3TPATP1;TUBB2C;TUBB4B;TUBB3;TUBB2A;TUBB8;TUBB6	Tubulin beta-4A chain;Tubulin beta chain;Tubulin beta-4B chain;Tubulin beta-3 chain;Tubulin beta-2A chain;Tubulin beta-8 chain-like protein LOC260334;Tubulin beta-8 chain;Tubulin beta-6 chain
1	0	10	1142.63	9.2193e-12	199.46	5643900000	45	LAVNMVPFPR	P04350;B4DE77;B4DJ43;B4DFH6;Q5JP53;Q5SU16;P07437;B7ZAF0;Q6LC01;B4DY90;Q5ST81;Q9BUU9;B4E052;B4DQN9;Q96B85;B4DXZ5;B4DMU8;Q1KSF8;Q8IZ29;P68371;Q8N6N5;Q8IWP6;B3KML9;Q96HX0;Q13509;Q9BV28;Q53G92;B2RBD5;A0A0B4J269;Q13509-2;Q3ZCR3;Q13885;B2R6L0;A6NNZ2;Q3ZCM7;A0A075B736;Q5SQY0;Q9BUF5;B3KS31;B4DP54;K7ESM5;B4E386	Q8IZ29	TUBB4A;TUBB;XTP3TPATP1;TUBB2C;TUBB4B;TUBB3;TUBB2A;TUBB8;TUBB6	Tubulin beta-4A chain;Tubulin beta chain;Tubulin beta-4B chain;Tubulin beta-3 chain;Tubulin beta-2A chain;Tubulin beta-8 chain-like protein LOC260334;Tubulin beta-8 chain;Tubulin beta-6 chain
1	0	14	1619.83	4.0635e-06	142.83	4852700000	44	LHFFMPGFAPLTSR	P04350;B4DE77;B4DJ43;B4DFH6;I0CMK4;Q5JP53;Q5SU16;P07437;B7ZAF0;Q6LC01;B4DY90;Q5ST81;B7ZAK1;Q9BUU9;B4E052;B4DQN9;Q96B85;B4DXZ5;B4DMU8;Q1KSF8;Q8IZ29;P68371;Q8N6N5;Q8IWP6;B3KML9;Q96HX0;Q13885;B2R6L0;A6NNZ2;Q3ZCM7;A0A075B736;Q5SQY0;Q9BUF5;B3KS31;B4DP54;K7ESM5;B4E386	Q8IZ29	TUBB4A;TUBB4Q;TUBB;XTP3TPATP1;TUBB2C;TUBB4B;TUBB2A;TUBB8;TUBB6	Tubulin beta-4A chain;Tubulin beta chain;Tubulin beta-4B chain;Tubulin beta-2A chain;Tubulin beta-8 chain-like protein LOC260334;Tubulin beta-8 chain;Tubulin beta-6 chain
1	0	25	2634.33	2.6035e-32	234.37	966350000	19	LTTPTYGDLNHLVSATMSGVTTSLR	Q9BUF5;B3KS31;B4DP54;K7ESM5;B4E386	Q9BUF5	TUBB6	Tubulin beta-6 chain
0	1	17	1856.93	2.7874e-123	394.93	809380000	13	MASTFIGNSTAIQELFK	Q9BUF5;B3KS31;B4DP54;B4E386	Q9BUF5	TUBB6	Tubulin beta-6 chain
1	1	19	2139.07	7.1592e-05	126.42	1227000	1	MREIVHIQAGQCGNQIGTK	Q9BUF5;B4DP54;K7ESM5;K7EL29;K7EN98;K7ESQ3;K7EQT3;K7EJ64;K7ERA8;K7EJZ4;K7EPE5	Q9BUF5	TUBB6	Tubulin beta-6 chain
1	0	9	1064.42	2.7749e-06	166.34	1076000000	25	NMMAACDPR	P04350;B4DE77;B4DJ43;B4DFH6;Q5JP53;Q5SU16;P07437;B7ZAF0;Q6LC01;B4DY90;Q5ST81;B7ZAK1;Q9BUU9;B4E052;B4DQN9;Q96B85;B4DXZ5;B4DMU8;Q1KSF8;Q8IZ29;P68371;Q8N6N5;Q8IWP6;B3KML9;Q96HX0;A4UCT2;Q13509;Q9BV28;Q53G92;B2RBD5;A0A0B4J269;Q13509-2;Q3ZCR3;Q13885;B2R6L0;A6NNZ2;Q3ZCM7;A0A075B736;Q5SQY0;Q9BUF5;B3KS31;B4DP54;K7ESM5;B4E386	Q8IZ29	TUBB4A;TUBB;XTP3TPATP1;TUBB2C;TUBB4B;TUBB3;TUBB2A;TUBB8;TUBB6	Tubulin beta-4A chain;Tubulin beta chain;Tubulin beta-4B chain;Tubulin beta-3 chain;Tubulin beta-2A chain;Tubulin beta-8 chain-like protein LOC260334;Tubulin beta-8 chain;Tubulin beta-6 chain
0	1	14	1695.83	5.3944e-49	286.74	3316800000	21	NSSYFVEWIPNNVK	P04350;B4DE77;B4DJ43;B4DFH6;Q5JP53;Q5SU16;P07437;B7ZAF0;Q6LC01;B4DY90;Q5ST81;B7ZAK1;Q9BUU9;B4E052;B4DQN9;Q96B85;B4DXZ5;B4DMJ5;Q6P602;Q8IZ29;P68371;Q8N6N5;Q8IWP6;B3KML9;Q96HX0;A4UCT2;Q13509;Q9BV28;B2RBD5;A0A0B4J269;Q13509-2;Q13885;B2R6L0;Q9BUF5;B3KS31;B4DP54;K7ESM5;B4E386	Q8IZ29	TUBB4A;TUBB;TUBB2C;TUBB4B;TUBB3;TUBB2A;TUBB6	Tubulin beta-4A chain;Tubulin beta chain;Tubulin beta-4B chain;Tubulin beta-3 chain;Tubulin beta-2A chain;Tubulin beta-6 chain
2	0	11	1370.68	0.0099516	80.014	1531600	1	RISEQFSAMFR	Q9BUF5;B3KS31;B4DP54;B4E386	Q9BUF5	TUBB6	Tubulin beta-6 chain
1	0	9	1007.52	0.00064657	130.66	28360000	5	SGPFGQLFR	Q9BUF5;B3KS31;B4DP54;K7EL29;K7ES63;K7EN98;K7ESQ3;K7EQT3;K7EJ64;K7ERA8;K7EJZ4;K7EPE5	Q9BUF5	TUBB6	Tubulin beta-6 chain
1	1	26	2825.37	2.1885e-21	195.13	657210000	13	SGPFGQLFRPDNFIFGQTGAGNNWAK	Q9BUF5;B3KS31;K7EL29;K7ES63;K7EN98	Q9BUF5	TUBB6	Tubulin beta-6 chain
1	0	9	1025.53	4.1428e-05	149.72	200450000	28	VAVCDIPPR	Q13509;Q9BV28;Q53G92;B2RBD5;A0A0B4J269;Q13509-2;Q9BUF5;B3KS31;B4DP54;K7ESM5;B4E386	Q9BUF5	TUBB3;TUBB6	Tubulin beta-3 chain;Tubulin beta-6 chain
1	0	39	4592.1	0.018597	33.762	4888800	7	VSDTVVEPYNATLSVHQLVENTDETYCIDNEALYDICFR	P04350;B4DE77;M0R2D3;M0QYM7;M0R042;Q5JP53;Q5SU16;P07437;B7ZAF0;Q6LC01;B4DY90;Q5ST81;B7ZAK1;Q9BUU9;B4E052;B4DQN9;Q1KSF8;Q8IZ29;P68371;Q8N6N5;Q8IWP6;B3KML9;Q9BUF5;B3KS31;B4DP54;K7ESM5;B4E386	Q8IZ29	TUBB4A;TUBB;XTP3TPATP1;TUBB2C;TUBB4B;TUBB6	Tubulin beta-4A chain;Tubulin beta chain;Tubulin beta-4B chain;Tubulin beta-6 chain
1	0	9	1068.6	7.9349e-14	204.07	1759100000	10	YLTVATVFR	Q13509;Q9BV28;Q53G92;B2RBD5;A0A0B4J269;Q13509-2;Q3ZCR3;Q9BUF5;B3KS31;B4DP54;K7ESM5;B4E386	Q9BUF5	TUBB3;TUBB6	Tubulin beta-3 chain;Tubulin beta-6 chain
0	1	15	1690.86	2.3561e-58	296.25	2293000000	37	ALTVPELTQQMFDAK	P04350;B4DE77;B4DJ43;B4DFH6;Q8IZ29;P68371;Q8N6N5;Q8IWP6;B3KML9;Q96HX0;Q13509;Q9BV28;Q53G92;B2RBD5;A0A0B4J269;Q13509-2;Q3ZCR3	Q8IZ29	TUBB4A;TUBB2C;TUBB4B;TUBB3	Tubulin beta-4A chain;Tubulin beta-4B chain;Tubulin beta-3 chain
1	0	15	1600.81	2.8653e-32	247.11	1985700000	19	AVLVDLEPGTMDSVR	P04350;B4DE77;B4DJ43;M0R278;M0QY85;M0R0X0;M0QY37;M0QX14;M0QZL7;A0A075B724;Q8IZ29;P68371;Q8N6N5;Q8IWP6;B3KML9;B4DNW1;Q3ZCM7	Q8IZ29	TUBB4A;TUBB8;TUBB2C;TUBB4B	Tubulin beta-4A chain;Tubulin beta-4B chain;Tubulin beta-8 chain
0	1	17	1821.92	1.92e-108	369.51	4134000000	23	EIVHLQAGQCGNQIGAK	P04350;B4DJ43;B4DFH6;M0R2D3;M0QYM7;M0R278;M0QY85;M0R042;M0R0X0;M0QY37;M0QX14;M0QZL7;M0R2T4;Q8IZ29;P68371;Q8N6N5;Q8IWP6;B4DNW1	Q8IZ29	TUBB4A;TUBB2C;TUBB4B	Tubulin beta-4A chain;Tubulin beta-4B chain
0	1	12	1445.68	6.9271e-56	307.97	1567300000	22	EVDEQMLNVQNK	Q5JP53;Q5SU16;P07437;B7ZAF0;Q6LC01;B4DY90;Q5ST81;B7ZAK1;Q9BUU9;B4E052;B4DQN9;Q96B85;B4DXZ5;B4DMU8;Q1KSF8;B4DMJ5;Q6P602;Q8IZ29;P68371;Q8N6N5;Q8IWP6;B3KML9;Q96HX0;A4UCT2;Q13885;B2R6L0	Q8IZ29	TUBB;XTP3TPATP1;TUBB2C;TUBB4B;TUBB2A	Tubulin beta chain;Tubulin beta-4B chain;Tubulin beta-2A chain
0	2	26	3123.5	0.030689	74.364	0	0	EVDEQMLNVQNKNSSYFVEWIPNNVK	Q5JP53;Q5SU16;P07437;B7ZAF0;Q6LC01;B4DY90;Q5ST81;B7ZAK1;Q9BUU9;B4E052;B4DQN9;Q96B85;B4DXZ5;B4DMJ5;Q6P602;Q8IZ29;P68371;Q8N6N5;Q8IWP6;B3KML9;Q96HX0;A4UCT2;Q13885;B2R6L0	Q8IZ29	TUBB;TUBB2C;TUBB4B;TUBB2A	Tubulin beta chain;Tubulin beta-4B chain;Tubulin beta-2A chain
1	0	10	1129.59	6.0966e-07	166.86	2837600000	28	FPGQLNADLR	P04350;B4DE77;B4DJ43;M0R2D3;Q5JP53;Q5SU16;P07437;B7ZAF0;Q6LC01;B4DY90;Q5ST81;B7ZAK1;Q9BUU9;B4E052;B4DQN9;Q96B85;B4DXZ5;B4DMU8;Q1KSF8;Q8IZ29;P68371;Q8N6N5;Q8IWP6;B3KML9;Q96HX0;Q13509;Q9BV28;Q53G92;B2RBD5;A0A0B4J269;Q13509-2;Q3ZCR3;G3V2A3;Q13885;B2R6L0;A5D907;A5D906;A6NNZ2;Q3ZCM7;A0A075B736;Q5SQY0;Q9BUF5;B3KS31;B4DP54;K7ESM5;B4E386	Q8IZ29	TUBB4A;TUBB;XTP3TPATP1;TUBB2C;TUBB4B;TUBB3;TUBB2A;TUBB8;TUBB6	Tubulin beta-4A chain;Tubulin beta chain;Tubulin beta-4B chain;Tubulin beta-3 chain;Tubulin beta-2A chain;Tubulin beta-8 chain-like protein LOC260334;Tubulin beta-8 chain;Tubulin beta-6 chain
1	1	11	1257.68	0.00014411	136.49	257030000	11	FPGQLNADLRK	P04350;B4DE77;B4DJ43;M0R2D3;Q5JP53;Q5SU16;P07437;B7ZAF0;Q6LC01;B4DY90;Q5ST81;B7ZAK1;Q9BUU9;B4E052;B4DQN9;Q96B85;B4DXZ5;B4DMU8;Q1KSF8;Q8IZ29;P68371;Q8N6N5;Q8IWP6;B3KML9;Q96HX0;Q13509;Q9BV28;Q53G92;B2RBD5;A0A0B4J269;Q13509-2;Q3ZCR3;G3V2A3;Q13885;B2R6L0;A5D907;A5D906;A6NNZ2;Q3ZCM7;A0A075B736;Q5SQY0;Q9BUF5;B3KS31;B4DP54;K7ESM5;B4E386	Q8IZ29	TUBB4A;TUBB;XTP3TPATP1;TUBB2C;TUBB4B;TUBB3;TUBB2A;TUBB8;TUBB6	Tubulin beta-4A chain;Tubulin beta chain;Tubulin beta-4B chain;Tubulin beta-3 chain;Tubulin beta-2A chain;Tubulin beta-8 chain-like protein LOC260334;Tubulin beta-8 chain;Tubulin beta-6 chain
1	0	27	3115.42	4.7124e-29	205.23	1972500000	19	FWEVISDEHGIDPTGTYHGDSDLQLER	P04350;B4DJ43;M0R2D3;M0QYM7;M0R278;M0QY85;M0R0X0;M0QY37;M0QX14;M0QZL7;Q8IZ29;P68371;Q8N6N5;Q8IWP6;B3KML9;B4DNW1	Q8IZ29	TUBB4A;TUBB2C;TUBB4B	Tubulin beta-4A chain;Tubulin beta-4B chain
1	0	18	1957.97	2.9565e-83	342.97	4299900000	26	GHYTEGAELVDSVLDVVR	Q5JP53;Q5SU16;P07437;B7ZAF0;Q6LC01;Q5ST81;B7ZAK1;B4DMJ5;Q8IZ29;P68371;Q8N6N5;Q8IWP6;Q13509;Q9BV28;Q53G92;B2RBD5;A0A0B4J269;Q13509-2;Q3ZCR3;G3V2A3;Q13885;B2R6L0;A5D907;A5D906	Q8IZ29	TUBB;TUBB2C;TUBB4B;TUBB3;TUBB2A	Tubulin beta chain;Tubulin beta-4B chain;Tubulin beta-3 chain;Tubulin beta-2A chain
1	1	19	2086.07	2.7928e-09	166.67	97910000	3	GHYTEGAELVDSVLDVVRK	Q5JP53;Q5SU16;P07437;B7ZAF0;Q6LC01;Q5ST81;B7ZAK1;B4DMJ5;Q8IZ29;P68371;Q8N6N5;Q8IWP6;Q13509;Q9BV28;Q53G92;B2RBD5;A0A0B4J269;Q13509-2;Q3ZCR3;G3V2A3;Q13885;B2R6L0;A5D907;A5D906	Q8IZ29	TUBB;TUBB2C;TUBB4B;TUBB3;TUBB2A	Tubulin beta chain;Tubulin beta-4B chain;Tubulin beta-3 chain;Tubulin beta-2A chain
0	1	12	1318.7	9.0304e-46	276.12	3767100000	30	IMNTFSVVPSPK	P04350;B4DE77;M0R2D3;M0QYM7;M0R042;Q5JP53;Q5SU16;P07437;B7ZAF0;Q6LC01;B4DY90;Q5ST81;B7ZAK1;Q9BUU9;B4E052;B4DQN9;Q1KSF8;Q8IZ29;P68371;Q8N6N5;Q8IWP6;B3KML9;Q13509;Q9BV28;Q53G92;B2RBD5;A0A0B4J269;Q13509-2;Q3ZCR3;G3V2A3	Q8IZ29	TUBB4A;TUBB;XTP3TPATP1;TUBB2C;TUBB4B;TUBB3	Tubulin beta-4A chain;Tubulin beta chain;Tubulin beta-4B chain;Tubulin beta-3 chain
0	1	12	1327.64	2.6257e-46	287.29	2629200000	14	INVYYNEATGGK	Q8IZ29;P68371;Q8N6N5;Q8IWP6;B3KML9;B4DNW1	Q8IZ29	TUBB2C;TUBB4B	Tubulin beta-4B chain
2	0	8	1076.53	0.031591	104.01	0	1	IREEYPDR	Q5JP53;Q5SU16;P07437;B7ZAF0;Q6LC01;B4DY90;Q5ST81;B7ZAK1;Q9BUU9;B4E052;B4DQN9;Q1KSF8;Q8IZ29;P68371;Q8N6N5;Q8IWP6;B3KML9;Q13885;B2R6L0;A5D907;A5D906;A6NNZ2;Q3ZCM7;A0A075B736;Q5SQY0	Q8IZ29	TUBB;XTP3TPATP1;TUBB2C;TUBB4B;TUBB2A;TUBB8	Tubulin beta chain;Tubulin beta-4B chain;Tubulin beta-2A chain;Tubulin beta-8 chain-like protein LOC260334;Tubulin beta-8 chain
1	0	10	1228.59	2.884e-41	289.22	3085200000	23	ISEQFTAMFR	P04350;B4DE77;B4DJ43;B4DFH6;Q5JP53;Q5SU16;P07437;B7ZAF0;Q6LC01;B4DY90;Q5ST81;B7ZAK1;Q9BUU9;B4E052;B4DQN9;Q96B85;B4DXZ5;B4DMU8;B4DMJ5;Q6P602;A4UCU2;Q8IZ29;P68371;Q8N6N5;Q8IWP6;B3KML9;Q96HX0;Q13509;Q9BV28;Q53G92;B2RBD5;A0A0B4J269;Q13509-2;Q13885;B2R6L0	Q8IZ29	TUBB4A;TUBB;TUBB2C;TUBB4B;TUBB3;TUBB2A	Tubulin beta-4A chain;Tubulin beta chain;Tubulin beta-4B chain;Tubulin beta-3 chain;Tubulin beta-2A chain
1	1	11	1270.72	0.0061434	106.62	31382000	1	KLAVNMVPFPR	P04350;B4DE77;B4DJ43;B4DFH6;Q5JP53;Q5SU16;P07437;B7ZAF0;Q6LC01;B4DY90;Q5ST81;Q9BUU9;B4E052;B4DQN9;Q96B85;B4DXZ5;B4DMU8;Q1KSF8;Q8IZ29;P68371;Q8N6N5;Q8IWP6;B3KML9;Q96HX0;Q13509;Q9BV28;Q53G92;B2RBD5;A0A0B4J269;Q13509-2;Q3ZCR3;Q13885;B2R6L0;A6NNZ2;Q3ZCM7;A0A075B736;Q5SQY0;Q9BUF5;B3KS31;B4DP54;K7ESM5;B4E386	Q8IZ29	TUBB4A;TUBB;XTP3TPATP1;TUBB2C;TUBB4B;TUBB3;TUBB2A;TUBB8;TUBB6	Tubulin beta-4A chain;Tubulin beta chain;Tubulin beta-4B chain;Tubulin beta-3 chain;Tubulin beta-2A chain;Tubulin beta-8 chain-like protein LOC260334;Tubulin beta-8 chain;Tubulin beta-6 chain
1	0	10	1142.63	9.2193e-12	199.46	5643900000	45	LAVNMVPFPR	P04350;B4DE77;B4DJ43;B4DFH6;Q5JP53;Q5SU16;P07437;B7ZAF0;Q6LC01;B4DY90;Q5ST81;Q9BUU9;B4E052;B4DQN9;Q96B85;B4DXZ5;B4DMU8;Q1KSF8;Q8IZ29;P68371;Q8N6N5;Q8IWP6;B3KML9;Q96HX0;Q13509;Q9BV28;Q53G92;B2RBD5;A0A0B4J269;Q13509-2;Q3ZCR3;Q13885;B2R6L0;A6NNZ2;Q3ZCM7;A0A075B736;Q5SQY0;Q9BUF5;B3KS31;B4DP54;K7ESM5;B4E386	Q8IZ29	TUBB4A;TUBB;XTP3TPATP1;TUBB2C;TUBB4B;TUBB3;TUBB2A;TUBB8;TUBB6	Tubulin beta-4A chain;Tubulin beta chain;Tubulin beta-4B chain;Tubulin beta-3 chain;Tubulin beta-2A chain;Tubulin beta-8 chain-like protein LOC260334;Tubulin beta-8 chain;Tubulin beta-6 chain
1	0	14	1619.83	4.0635e-06	142.83	4852700000	44	LHFFMPGFAPLTSR	P04350;B4DE77;B4DJ43;B4DFH6;I0CMK4;Q5JP53;Q5SU16;P07437;B7ZAF0;Q6LC01;B4DY90;Q5ST81;B7ZAK1;Q9BUU9;B4E052;B4DQN9;Q96B85;B4DXZ5;B4DMU8;Q1KSF8;Q8IZ29;P68371;Q8N6N5;Q8IWP6;B3KML9;Q96HX0;Q13885;B2R6L0;A6NNZ2;Q3ZCM7;A0A075B736;Q5SQY0;Q9BUF5;B3KS31;B4DP54;K7ESM5;B4E386	Q8IZ29	TUBB4A;TUBB4Q;TUBB;XTP3TPATP1;TUBB2C;TUBB4B;TUBB2A;TUBB8;TUBB6	Tubulin beta-4A chain;Tubulin beta chain;Tubulin beta-4B chain;Tubulin beta-2A chain;Tubulin beta-8 chain-like protein LOC260334;Tubulin beta-8 chain;Tubulin beta-6 chain
1	0	25	2707.33	3.6707e-32	232.57	3194800000	28	LTTPTYGDLNHLVSATMSGVTTCLR	P04350;B4DE77;M0R2D3;Q5JP53;Q5SU16;P07437;B7ZAF0;B4DY90;Q5ST81;B7ZAK1;Q9BUU9;B4E052;B4DQN9;Q96B85;B4DXZ5;B4DMU8;Q1KSF8;Q8IZ29;P68371;Q8IWP6;Q13885;B2R6L0;A5D907;A5D906	Q8IZ29	TUBB4A;TUBB;XTP3TPATP1;TUBB2C;TUBB4B;TUBB2A	Tubulin beta-4A chain;Tubulin beta chain;Tubulin beta-4B chain;Tubulin beta-2A chain
1	1	19	2109.06	4.0131e-05	130.29	6642600	2	MREIVHLQAGQCGNQIGAK	P04350;B4DJ43;B4DFH6;M0R2D3;M0QYM7;M0QY85;M0R042;M0R0X0;M0QY37;M0QX14;M0R2T4;Q8IZ29;P68371;Q8N6N5;Q8IWP6;B4DNW1	Q8IZ29	TUBB4A;TUBB2C;TUBB4B	Tubulin beta-4A chain;Tubulin beta-4B chain
0	1	17	1856.93	2.9326e-109	378.72	1359900000	8	MSATFIGNSTAIQELFK	Q8IZ29;P68371;Q8N6N5;B3KML9;Q96HX0;Q13885;B2R6L0	Q8IZ29	TUBB2C;TUBB4B;TUBB2A	Tubulin beta-4B chain;Tubulin beta-2A chain
1	1	18	2013.04	0.0010038	102.03	12422000	2	MSATFIGNSTAIQELFKR	Q8IZ29;P68371;Q8N6N5;B3KML9;Q96HX0;Q13885;B2R6L0	Q8IZ29	TUBB2C;TUBB4B;TUBB2A	Tubulin beta-4B chain;Tubulin beta-2A chain
0	2	16	1922.89	0.00018586	123.1	2677600	3	MSMKEVDEQMLNVQNK	Q5JP53;Q5SU16;P07437;B7ZAF0;Q6LC01;B4DY90;Q5ST81;B7ZAK1;Q9BUU9;B4E052;B4DQN9;Q96B85;B4DXZ5;B4DMU8;Q1KSF8;Q6P602;Q8IZ29;P68371;Q8N6N5;Q8IWP6;B3KML9;Q96HX0;A4UCT2;Q13885;B2R6L0	Q8IZ29	TUBB;XTP3TPATP1;TUBB2C;TUBB4B;TUBB2A	Tubulin beta chain;Tubulin beta-4B chain;Tubulin beta-2A chain
1	0	9	1064.42	2.7749e-06	166.34	1076000000	25	NMMAACDPR	P04350;B4DE77;B4DJ43;B4DFH6;Q5JP53;Q5SU16;P07437;B7ZAF0;Q6LC01;B4DY90;Q5ST81;B7ZAK1;Q9BUU9;B4E052;B4DQN9;Q96B85;B4DXZ5;B4DMU8;Q1KSF8;Q8IZ29;P68371;Q8N6N5;Q8IWP6;B3KML9;Q96HX0;A4UCT2;Q13509;Q9BV28;Q53G92;B2RBD5;A0A0B4J269;Q13509-2;Q3ZCR3;Q13885;B2R6L0;A6NNZ2;Q3ZCM7;A0A075B736;Q5SQY0;Q9BUF5;B3KS31;B4DP54;K7ESM5;B4E386	Q8IZ29	TUBB4A;TUBB;XTP3TPATP1;TUBB2C;TUBB4B;TUBB3;TUBB2A;TUBB8;TUBB6	Tubulin beta-4A chain;Tubulin beta chain;Tubulin beta-4B chain;Tubulin beta-3 chain;Tubulin beta-2A chain;Tubulin beta-8 chain-like protein LOC260334;Tubulin beta-8 chain;Tubulin beta-6 chain
0	1	14	1695.83	5.3944e-49	286.74	3316800000	21	NSSYFVEWIPNNVK	P04350;B4DE77;B4DJ43;B4DFH6;Q5JP53;Q5SU16;P07437;B7ZAF0;Q6LC01;B4DY90;Q5ST81;B7ZAK1;Q9BUU9;B4E052;B4DQN9;Q96B85;B4DXZ5;B4DMJ5;Q6P602;Q8IZ29;P68371;Q8N6N5;Q8IWP6;B3KML9;Q96HX0;A4UCT2;Q13509;Q9BV28;B2RBD5;A0A0B4J269;Q13509-2;Q13885;B2R6L0;Q9BUF5;B3KS31;B4DP54;K7ESM5;B4E386	Q8IZ29	TUBB4A;TUBB;TUBB2C;TUBB4B;TUBB3;TUBB2A;TUBB6	Tubulin beta-4A chain;Tubulin beta chain;Tubulin beta-4B chain;Tubulin beta-3 chain;Tubulin beta-2A chain;Tubulin beta-6 chain
2	0	11	1384.69	0.021532	89.44	19768000	1	RISEQFTAMFR	P04350;B4DE77;B4DJ43;B4DFH6;Q5JP53;Q5SU16;P07437;B7ZAF0;Q6LC01;B4DY90;Q5ST81;B7ZAK1;Q9BUU9;B4E052;B4DQN9;Q96B85;B4DXZ5;B4DMU8;B4DMJ5;Q6P602;A4UCU2;Q8IZ29;P68371;Q8N6N5;Q8IWP6;B3KML9;Q96HX0;Q13509;Q9BV28;Q53G92;B2RBD5;A0A0B4J269;Q13509-2;Q13885;B2R6L0	Q8IZ29	TUBB4A;TUBB;TUBB2C;TUBB4B;TUBB3;TUBB2A	Tubulin beta-4A chain;Tubulin beta chain;Tubulin beta-4B chain;Tubulin beta-3 chain;Tubulin beta-2A chain
1	1	26	2797.34	2.9797e-68	298.09	3270100000	22	SGPFGQIFRPDNFVFGQSGAGNNWAK	P04350;B4DE77;B4DJ43;M0R278;M0QY85;M0QZL7;M0R1I1;Q5JP53;Q5SU16;P07437;B7ZAF0;Q6LC01;B4DY90;Q5ST81;B7ZAK1;B4DQN9;B4DMJ5;Q8IZ29;P68371;Q8N6N5;Q8IWP6;Q13885;B2R6L0;A5D907;A5D906	Q8IZ29	TUBB4A;TUBB;TUBB2C;TUBB4B;TUBB2A	Tubulin beta-4A chain;Tubulin beta chain;Tubulin beta-4B chain;Tubulin beta-2A chain
1	0	9	1027.51	0.00021141	143.03	315500000	40	TAVCDIPPR	P04350;B4DE77;B4DJ43;B4DFH6;Q5JP53;Q5SU16;P07437;B7ZAF0;Q6LC01;B4DY90;Q5ST81;B7ZAK1;Q9BUU9;B4E052;B4DQN9;Q96B85;B4DXZ5;B4DMU8;B4DMJ5;Q6P602;Q8IZ29;P68371;Q8N6N5;Q8IWP6;B3KML9;Q96HX0;A4UCT2;Q13885;B2R6L0;A6NNZ2;Q3ZCM7;A0A075B736;Q5SQY0	Q8IZ29	TUBB4A;TUBB;TUBB2C;TUBB4B;TUBB2A;TUBB8	Tubulin beta-4A chain;Tubulin beta chain;Tubulin beta-4B chain;Tubulin beta-2A chain;Tubulin beta-8 chain-like protein LOC260334;Tubulin beta-8 chain
1	0	39	4592.1	0.018597	33.762	4888800	7	VSDTVVEPYNATLSVHQLVENTDETYCIDNEALYDICFR	P04350;B4DE77;M0R2D3;M0QYM7;M0R042;Q5JP53;Q5SU16;P07437;B7ZAF0;Q6LC01;B4DY90;Q5ST81;B7ZAK1;Q9BUU9;B4E052;B4DQN9;Q1KSF8;Q8IZ29;P68371;Q8N6N5;Q8IWP6;B3KML9;Q9BUF5;B3KS31;B4DP54;K7ESM5;B4E386	Q8IZ29	TUBB4A;TUBB;XTP3TPATP1;TUBB2C;TUBB4B;TUBB6	Tubulin beta-4A chain;Tubulin beta chain;Tubulin beta-4B chain;Tubulin beta-6 chain
1	0	9	1038.59	2.3723e-18	224.36	2303500000	14	YLTVAAVFR	P04350;B4DE77;B4DJ43;B4DFH6;Q5JP53;Q5SU16;P07437;B7ZAF0;Q6LC01;B4DY90;Q5ST81;B7ZAK1;Q9BUU9;B4E052;Q96B85;B4DXZ5;B4DMU8;Q1KSF8;Q8IZ29;P68371;Q8N6N5;Q8IWP6;B3KML9;Q96HX0;A4UCT2	Q8IZ29	TUBB4A;TUBB;XTP3TPATP1;TUBB2C;TUBB4B	Tubulin beta-4A chain;Tubulin beta chain;Tubulin beta-4B chain
1	0	12	1319.56	0.0034889	99.844	8797400	1	DLGGFDEDAEPR	A0A024R084;Q9BRK5;A0A024R0A9;Q9BRK5-6;H0Y3T6;G3V1E2;Q9BRK5-4;Q9BRK5-3	A0A024R084	SDF4	45 kDa calcium-binding protein
0	1	10	1160.6	0.0019613	97.965	48027000	3	GFHQEVFLGK	A0A024R084;Q9BRK5;A0A024R0A9;Q9BRK5-6;H0Y3T6;G3V1E2;Q9BRK5-4;Q9BRK5-3	A0A024R084	SDF4	45 kDa calcium-binding protein
1	0	9	1083.51	0.018923	62.582	15790000	3	LEMDGHLNR	A0A024R084;Q9BRK5;A0A024R0A9;Q9BRK5-6;G3V1E2;Q9BRK5-4;Q9BRK5-3	A0A024R084	SDF4	45 kDa calcium-binding protein
1	0	28	3326.59	3.7859e-07	116.94	16682000	2	WYQADSPPADLLLTEEEFLSFLHPEHSR	A0A024R084;Q9BRK5;A0A024R0A9;Q9BRK5-6;H0Y3T6;Q9BRK5-2	A0A024R084	SDF4	45 kDa calcium-binding protein
0	1	9	1064.48	0.010347	89.886	17435000	2	YSEFFTGSK	A0A024R084;Q9BRK5;Q9BRK5-2;Q9BRK5-5	A0A024R084	SDF4	45 kDa calcium-binding protein
1	0	14	1531.71	5.5769e-59	307.43	15199000	2	AVTEQGAELSNEER	P27348;E9PG15;Q53RR5	P27348	YWHAQ	14-3-3 protein theta
1	0	10	1188.65	2.2381e-20	229.17	229890000	10	DSTLIMQLLR	V9HWD6;P31946-2;P31946;B5BU24;P31947-2;P31947;V9HW98;P62258;G9K389;G9K388;P62258-2;B7ZA86;K7EM20;D0PNI1;P63104;E7EX29;B0AZS6;P63104-2;B7Z2E6;H0YB80;Q2F831;P27348;B4DMT8;Q53S41;B4DY04;P61981;B4DE78;B4DHC4;B3KNB4;A0A024R1K7;Q04917;B2R6N6;Q9H4N8	D0PNI1	HEL-S-1;YWHAB;SFN;HEL2;YWHAE;YWHAE/FAM22B fusion;YWHAE/FAM22A fusion;YWHAZ;YWHAQ;YWHAG;YWHAH	14-3-3 protein beta/alpha;14-3-3 protein beta/alpha, N-terminally processed;14-3-3 protein sigma;14-3-3 protein epsilon;14-3-3 protein zeta/delta;14-3-3 protein theta;14-3-3 protein gamma;14-3-3 protein gamma, N-terminally processed;14-3-3 protein eta
0	1	8	906.517	0.0040766	114.89	435250000	2	NLLSVAYK	V9HWD6;P31946-2;P31946;B5BU24;Q4VY20;Q4VY19;A0A0J9YWE8;Q59EQ2;A0A0J9YWZ2;P31947-2;P31947;Q3YBA8;V9HW98;P62258;G9K389;G9K388;P62258-2;B4DJF2;I3L3T1;K7EIT4;D0PNI1;P63104;E7EX29;E7ESK7;E5RGE1;E5RIR4;E9PD24;E7EVZ2;Q6LD62;P27348;E9PG15;Q53RR5;P61981;B4DE78;B4DHC4;B3KNB4;A0A024R1K7;Q04917;B2R6N6;A2IDB2	D0PNI1	HEL-S-1;YWHAB;SFN;HEL2;YWHAE;YWHAE/FAM22B fusion;YWHAE/FAM22A fusion;YWHAZ;14-3-3 protein;YWHAQ;YWHAG;YWHAH	14-3-3 protein beta/alpha;14-3-3 protein beta/alpha, N-terminally processed;14-3-3 protein sigma;14-3-3 protein epsilon;14-3-3 protein zeta/delta;14-3-3 protein theta;14-3-3 protein gamma;14-3-3 protein gamma, N-terminally processed;14-3-3 protein eta
0	1	18	2013.93	0.00042486	114.55	503240	2	QTIDNSQGAYQEAFDISK	P27348;B4DMT8;Q53S41;B4DY04	P27348	YWHAQ	14-3-3 protein theta
0	1	12	1390.74	9.8416e-08	161.25	26157000	4	SICTTVLELLDK	P27348;B4DMT8;E9PG15	P27348	YWHAQ	14-3-3 protein theta
0	1	19	2143.98	6.5692e-36	256.33	9577000	3	TAFDEAIAELDTLNEDSYK	P27348;B4DMT8;Q53S41;B4DY04	P27348	YWHAQ	14-3-3 protein theta
0	1	12	1319.67	0.00024245	126.32	1033300	1	YLIANATNPESK	P27348;B4DMT8;Q53S41;E9PG15	P27348	YWHAQ	14-3-3 protein theta
1	0	20	2329.01	3.0411e-16	194.67	1227000000	30	AFVHWYVGEGMEEGEFSEAR	P68363;A8JZY9;B3KPS3;B3KT06;P68363-2;P68366-2;P68366;B4DDU2;B4DN58;Q15670;Q53GA7;Q9BQE3;F5H5D3;B7Z1K5;Q71U36;Q71U36-2;B4DQK4;Q1ZYQ1;Q13748;Q9UQM3	P68363	TUBA1B;TUBA4A;TUBA1C;TUBA1A;TUBA2;TUBA3C	Tubulin alpha-1B chain;Tubulin alpha-4A chain;Tubulin alpha-1C chain;Tubulin alpha-1A chain;Tubulin alpha-3C/D chain
1	1	28	3216.42	0.0017529	62.707	1272200	1	AFVHWYVGEGMEEGEFSEAREDMAALEK	P68363;A8JZY9;B3KPS3;B3KT06;P68363-2;P68366-2;P68366;B4DDU2;B4DN58;Q53GA7;Q9BQE3;F5H5D3;B7Z1K5;Q71U36;Q71U36-2;B4DQK4;Q9UQM3	P68363	TUBA1B;TUBA4A;TUBA1C;TUBA1A	Tubulin alpha-1B chain;Tubulin alpha-4A chain;Tubulin alpha-1C chain;Tubulin alpha-1A chain
1	0	17	1863.9	2.9232e-59	295.22	1270200000	34	AVCMLSNTTAIAEAWAR	P68363;A8JZY9;B3KPS3;B3KT06;P68363-2;P68366-2;P68366;B4DDU2;B4DN58;Q15670;Q71U36;Q71U36-2;B4DQK4;Q1ZYQ1;Q13748;Q9UQM3;Q13748-2;Q6PEY2;V9GZ17	P68363	TUBA1B;TUBA4A;TUBA1A;TUBA2;TUBA3C;TUBA3E;TUBA8	Tubulin alpha-1B chain;Tubulin alpha-4A chain;Tubulin alpha-1A chain;Tubulin alpha-3C/D chain;Tubulin alpha-3E chain
0	1	24	2749.28	2.5588e-39	250.84	1196700000	20	AYHEQLSVAEITNACFEPANQMVK	P68363;A8JZY9;B3KPS3;B3KT06;P68363-2;P68366-2;P68366;B4DDU2;C9JDS9;Q71U36;Q71U36-2;B4DQK4;Q1ZYQ1;Q13748;Q9UQM3;Q13748-2;Q6PEY2	P68363	TUBA1B;TUBA4A;TUBA1A;TUBA2;TUBA3C;TUBA3E	Tubulin alpha-1B chain;Tubulin alpha-4A chain;Tubulin alpha-1A chain;Tubulin alpha-3C/D chain;Tubulin alpha-3E chain
0	1	8	905.416	0.00060345	141.52	1867400000	8	EDMAALEK	P68363;A8JZY9;B3KPS3;B3KT06;P68363-2;P68366-2;P68366;B4DDU2;B4DN58;Q53GA7;Q9BQE3;F5H5D3;B7Z1K5;Q71U36;Q71U36-2;B4DQK4;Q9UQM3	P68363	TUBA1B;TUBA4A;TUBA1C;TUBA1A	Tubulin alpha-1B chain;Tubulin alpha-4A chain;Tubulin alpha-1C chain;Tubulin alpha-1A chain
1	0	21	2408.2	1.0706e-86	337.64	1001900000	20	FDGALNVDLTEFQTNLVPYPR	P68363;A8JZY9;B3KPS3;B3KT06;P68363-2;P68366-2;P68366;B4DDU2;F8VVB9;C9JDS9;Q53GA7;Q9BQE3;F5H5D3;B7Z1K5;Q71U36;Q71U36-2;B4DQK4;Q1ZYQ1;Q13748;Q9UQM3;Q13748-2;Q6PEY2	P68363	TUBA1B;TUBA4A;TUBA1C;TUBA1A;TUBA2;TUBA3C;TUBA3E	Tubulin alpha-1B chain;Tubulin alpha-4A chain;Tubulin alpha-1C chain;Tubulin alpha-1A chain;Tubulin alpha-3C/D chain;Tubulin alpha-3E chain
0	1	7	886.426	0.00072862	145.04	265630000	13	FDLMYAK	P68363;A8JZY9;B3KPS3;B3KT06;P68363-2;P68366-2;P68366;B4DDU2;B4DN58;Q15670;Q53GA7;Q9BQE3;F5H5D3;B7Z1K5;Q8N532;Q71U36;Q71U36-2;B4DQK4;Q1ZYQ1;Q13748;Q9UQM3;Q6PEY2;V9GZ17;A6NHL2-2;A6NHL2	P68363	TUBA1B;TUBA4A;TUBA1C;TUBA1A;TUBA2;TUBA3C;TUBA3E;TUBA8;TUBAL3	Tubulin alpha-1B chain;Tubulin alpha-4A chain;Tubulin alpha-1C chain;Tubulin alpha-1A chain;Tubulin alpha-3C/D chain;Tubulin alpha-3E chain;Tubulin alpha chain-like 3
0	1	7	774.402	0.027659	88.029	997540	1	GHYTIGK	P68363;A8JZY9;B3KPS3;B3KT06;P68366-2;P68366;F8VVB9;F8VS66;F8VRZ4;F8VWV9;Q6QMJ5;C9JEV8;C9JQ00;C9JJQ8;C9JDL2;Q53GA7;Q9BQE3;F5H5D3;B7Z1K5;Q8N532;Q71U36;Q71U36-2;B4DQK4;Q1ZYQ1;Q13748;Q13748-2;Q6PEY2;F8VQQ4	P68363	TUBA1B;TUBA4A;TUBA1C;TUBA1A;TUBA1;TUBA2;TUBA3C;TUBA3E	Tubulin alpha-1B chain;Tubulin alpha-4A chain;Tubulin alpha-1C chain;Tubulin alpha-1A chain;Tubulin alpha-3C/D chain;Tubulin alpha-3E chain
0	1	16	1755.96	1.8811e-27	238.65	3542300000	29	IHFPLATYAPVISAEK	P68363;B3KPS3;B3KT06;P68363-2;P68366-2;P68366;B4DDU2;F8VVB9;C9JDS9;Q53GA7;Q9BQE3;F5H5D3;B7Z1K5;Q71U36;Q71U36-2;B4DQK4;Q1ZYQ1;Q13748;Q9UQM3;Q13748-2;Q6PEY2	P68363	TUBA1B;TUBA4A;TUBA1C;TUBA1A;TUBA2;TUBA3C;TUBA3E	Tubulin alpha-1B chain;Tubulin alpha-4A chain;Tubulin alpha-1C chain;Tubulin alpha-1A chain;Tubulin alpha-3C/D chain;Tubulin alpha-3E chain
0	2	11	1379.69	5.5807e-05	138.25	96612000	4	LDHKFDLMYAK	P68363;A8JZY9;B3KPS3;B3KT06;P68363-2;P68366-2;P68366;B4DDU2;B4DN58;Q15670;Q53GA7;Q9BQE3;F5H5D3;B7Z1K5;Q71U36;Q71U36-2;B4DQK4;Q1ZYQ1;Q13748;Q9UQM3;V9GZ17;A6NHL2-2;A6NHL2	P68363	TUBA1B;TUBA4A;TUBA1C;TUBA1A;TUBA2;TUBA3C;TUBA8;TUBAL3	Tubulin alpha-1B chain;Tubulin alpha-4A chain;Tubulin alpha-1C chain;Tubulin alpha-1A chain;Tubulin alpha-3C/D chain;Tubulin alpha chain-like 3
1	0	14	1486.87	1.4203e-48	278.36	1355500000	32	LISQIVSSITASLR	P68363;A8JZY9;B3KPS3;B3KT06;P68363-2;P68366-2;P68366;B4DDU2;F8VVB9;C9JDS9;Q9H853;Q53GA7;Q9BQE3;F5H5D3;B7Z1K5	P68363	TUBA1B;TUBA4A;TUBA4B;TUBA1C	Tubulin alpha-1B chain;Tubulin alpha-4A chain;Putative tubulin-like protein alpha-4B;Tubulin alpha-1C chain
0	1	7	780.402	0.0048676	129.68	802990000	3	LSVDYGK	P68363;A8JZY9;B3KPS3;B3KT06;P68366-2;P68366;B4DDU2;C9JDS9;C9JEV8;C9JQ00;C9JJQ8;D3DX41;Q53GA7;Q9BQE3;F5H5D3;B7Z1K5;Q71U36;Q71U36-2;B4DQK4;Q1ZYQ1;Q13748;Q9UQM3;Q13748-2;F8VQQ4	P68363	TUBA1B;TUBA4A;MGC16703;TUBA1C;TUBA1A;TUBA2;TUBA3C	Tubulin alpha-1B chain;Tubulin alpha-4A chain;Tubulin alpha-1C chain;Tubulin alpha-1A chain;Tubulin alpha-3C/D chain
2	0	14	1717.87	6.9953e-19	211.77	6366200000	18	NLDIERPTYTNLNR	P68363;A8JZY9;B3KPS3;B3KT06;P68366-2;P68366;B4DDU2;F8VVB9;C9JDS9;Q53GA7;Q9BQE3;F5H5D3;B7Z1K5;Q71U36;Q71U36-2;B4DQK4;Q1ZYQ1;Q13748;Q9UQM3;Q13748-2;Q6PEY2;F8VQQ4	P68363	TUBA1B;TUBA4A;TUBA1C;TUBA1A;TUBA2;TUBA3C;TUBA3E	Tubulin alpha-1B chain;Tubulin alpha-4A chain;Tubulin alpha-1C chain;Tubulin alpha-1A chain;Tubulin alpha-3C/D chain;Tubulin alpha-3E chain
1	0	8	977.493	1.0057e-08	186.76	225970000	5	PTYTNLNR	P68363;A8JZY9;B3KPS3;B3KT06;P68366-2;P68366;B4DDU2;F8VVB9;C9JDS9;Q9H853;Q53GA7;Q9BQE3;F5H5D3;B7Z1K5;Q71U36;Q71U36-2;B4DQK4;Q1ZYQ1;Q13748;Q9UQM3;Q13748-2;Q6PEY2;F8VQQ4	P68363	TUBA1B;TUBA4A;TUBA4B;TUBA1C;TUBA1A;TUBA2;TUBA3C;TUBA3E	Tubulin alpha-1B chain;Tubulin alpha-4A chain;Putative tubulin-like protein alpha-4B;Tubulin alpha-1C chain;Tubulin alpha-1A chain;Tubulin alpha-3C/D chain;Tubulin alpha-3E chain
0	1	12	1409.77	1.1686e-18	212.68	3832600000	19	QLFHPEQLITGK	P68363;A8JZY9;B3KPS3;B3KT06;P68363-2;P68366-2;P68366;F8VVB9;F8VS66;F8VRZ4;F8VWV9;F8VX09;Q6QMJ5;C9JEV8;C9JQ00;C9JJQ8;C9JDL2;C9K0S6;Q53GA7;Q9BQE3;F5H5D3;B7Z1K5;Q8N532;Q71U36;Q71U36-2;Q1ZYQ1;Q13748;Q13748-2;Q6PEY2;F8VQQ4	P68363	TUBA1B;TUBA4A;TUBA1C;TUBA1A;TUBA1;TUBA8;TUBA2;TUBA3C;TUBA3E	Tubulin alpha-1B chain;Tubulin alpha-4A chain;Tubulin alpha-1C chain;Tubulin alpha-1A chain;Tubulin alpha-3C/D chain;Tubulin alpha-3E chain
1	1	21	2414.2	0.00010182	105.92	152260000	6	QLFHPEQLITGKEDAANNYAR	P68363;A8JZY9;B3KPS3;B3KT06;P68363-2;P68366-2;P68366;F8VVB9;F8VS66;F8VRZ4;F8VWV9;F8VX09;Q6QMJ5;C9JEV8;C9JQ00;C9JJQ8;C9JDL2;C9K0S6;Q53GA7;Q9BQE3;F5H5D3;B7Z1K5;Q8N532;Q71U36;Q71U36-2;Q1ZYQ1;Q13748;Q13748-2;F8VQQ4	P68363	TUBA1B;TUBA4A;TUBA1C;TUBA1A;TUBA1;TUBA8;TUBA2;TUBA3C	Tubulin alpha-1B chain;Tubulin alpha-4A chain;Tubulin alpha-1C chain;Tubulin alpha-1A chain;Tubulin alpha-3C/D chain
3	0	15	1873.98	0.00045027	124.47	103020000	2	RNLDIERPTYTNLNR	P68363;A8JZY9;B3KPS3;B3KT06;P68366-2;P68366;B4DDU2;F8VVB9;C9JDS9;Q53GA7;Q9BQE3;F5H5D3;B7Z1K5;Q71U36;Q71U36-2;B4DQK4;Q1ZYQ1;Q13748;Q9UQM3;Q13748-2;Q6PEY2;F8VQQ4	P68363	TUBA1B;TUBA4A;TUBA1C;TUBA1A;TUBA2;TUBA3C;TUBA3E	Tubulin alpha-1B chain;Tubulin alpha-4A chain;Tubulin alpha-1C chain;Tubulin alpha-1A chain;Tubulin alpha-3C/D chain;Tubulin alpha-3E chain
1	1	14	1739.85	1.4994e-05	134.06	5705900	2	RSIQFVDWCPTGFK	P68363;A8JZY9;B3KPS3;B3KT06;P68363-2;P68366-2;P68366;B4DDU2	P68363	TUBA1B;TUBA4A	Tubulin alpha-1B chain;Tubulin alpha-4A chain
0	1	13	1583.74	5.4182e-32	244.71	1983400000	12	SIQFVDWCPTGFK	P68363;A8JZY9;B3KPS3;B3KT06;P68363-2;P68366-2;P68366;B4DDU2	P68363	TUBA1B;TUBA4A	Tubulin alpha-1B chain;Tubulin alpha-4A chain
0	1	18	1823.98	1.8953e-15	198.67	3633300000	17	VGINYQPPTVVPGGDLAK	P68363;A8JZY9;B3KPS3;B3KT06;P68363-2;P68366-2;P68366;B4DDU2;B4DN58;Q53GA7;Q9BQE3;F5H5D3;B7Z1K5;Q8N532;Q71U36;Q71U36-2;B4DQK4;Q1ZYQ1;Q13748;Q9UQM3;Q13748-2;Q6PEY2;V9GZ17	P68363	TUBA1B;TUBA4A;TUBA1C;TUBA1A;TUBA2;TUBA3C;TUBA3E;TUBA8	Tubulin alpha-1B chain;Tubulin alpha-4A chain;Tubulin alpha-1C chain;Tubulin alpha-1A chain;Tubulin alpha-3C/D chain;Tubulin alpha-3E chain
1	0	9	1248.55	1.9408e-07	172.14	2286900000	14	YMACCLLYR	P68363;A8JZY9;B3KPS3;B3KT06;P68363-2;P68366-2;P68366;B4DDU2;Q53GA7;Q9BQE3;F5H5D3;B7Z1K5;Q8N532;Q71U36;Q71U36-2;B4DQK4;Q9UQM3;A6NHL2-2;A6NHL2	P68363	TUBA1B;TUBA4A;TUBA1C;TUBA1A;TUBAL3	Tubulin alpha-1B chain;Tubulin alpha-4A chain;Tubulin alpha-1C chain;Tubulin alpha-1A chain;Tubulin alpha chain-like 3
1	0	15	1655.74	0.012651	91.592	1135800	0	AGFDSDYDQALADIR	P52701;P52701-4;P52701-3;A0A087WWJ1;Q1L838;P52701-2	P52701	MSH6;GTBP	DNA mismatch repair protein Msh6
0	1	11	1334.61	0.0030981	104.07	13231000	2	AIMYEETTYSK	P52701;P52701-4;P52701-3;A0A087WWJ1;Q1L838;P52701-2	P52701	MSH6;GTBP	DNA mismatch repair protein Msh6
0	1	13	1415.68	4.5663e-32	246.56	19151000	2	AYGVCFVDTSLGK	P52701;P52701-4;P52701-3;A0A087WWJ1;Q1L838;P52701-2	P52701	MSH6;GTBP	DNA mismatch repair protein Msh6
0	1	12	1493.72	3.3481e-38	270.93	32408000	3	ENEQSLLEYLEK	P52701;P52701-4;P52701-3;A0A087WWJ1;Q1L838;P52701-2	P52701	MSH6;GTBP	DNA mismatch repair protein Msh6
1	0	10	1230.57	7.4419e-05	144.55	23945000	3	FFIGQFSDDR	P52701;P52701-4;P52701-3;A0A087WWJ1;Q1L838;P52701-2	P52701	MSH6;GTBP	DNA mismatch repair protein Msh6
1	0	10	1202.63	0.012672	84.198	1440200	1	FPDLTVELNR	P52701;P52701-4;P52701-3;A0A087WWJ1;Q1L838;P52701-2	P52701	MSH6;GTBP	DNA mismatch repair protein Msh6
1	1	13	1473.77	0.0034013	86.911	21391000	1	GGHFYSAKPEILR	P52701;A0A087WWJ1;Q1L838;P52701-2;C9JH55;C9J8Y8;C9J7Y7;Q3SWU9	P52701	MSH6;GTBP	DNA mismatch repair protein Msh6
0	1	16	1607.73	0.0031708	101.53	1554400	1	GMTSESDSIGLTPGEK	P52701;P52701-4;P52701-3;A0A087WWJ1;Q1L838;P52701-2	P52701	MSH6;GTBP	DNA mismatch repair protein Msh6
1	0	15	1644.78	0.011473	70.68	31361000	3	GNWAHSGFPEIAFGR	P52701;P52701-4;P52701-3;A0A087WWJ1;Q1L838;P52701-2	P52701	MSH6;GTBP	DNA mismatch repair protein Msh6
0	1	18	1973.89	2.5733e-06	148.06	1570300	1	GTQTYSVLEGDPSENYSK	P52701;P52701-4;P52701-3;A0A087WWJ1;Q1L838;P52701-2	P52701	MSH6;GTBP	DNA mismatch repair protein Msh6
0	1	9	963.55	0.002653	96.034	4859800	1	IHNVGSPLK	P52701;P52701-4;P52701-3;A0A087WWJ1;Q1L838;P52701-2	P52701	MSH6;GTBP	DNA mismatch repair protein Msh6
0	1	12	1351.74	6.8743e-15	202	27590000	5	IIDFLSALEGFK	P52701;P52701-4;P52701-3;A0A087WWJ1;Q1L838;P52701-2	P52701	MSH6;GTBP	DNA mismatch repair protein Msh6
0	1	13	1420.73	4.5338e-08	157.56	17073000	3	IIGIMEEVADGFK	P52701;P52701-4;P52701-3;A0A087WWJ1;Q1L838;P52701-2	P52701	MSH6;GTBP	DNA mismatch repair protein Msh6
0	1	9	1028.61	0.00013845	145.9	23061000	3	ISEVVELLK	P52701;P52701-4;P52701-3;A0A087WWJ1;Q1L838;P52701-2	P52701	MSH6;GTBP	DNA mismatch repair protein Msh6
1	0	10	1141.61	0.0041888	101.35	13393000	1	LANLINAEER	P52701;P52701-4;P52701-3;A0A087WWJ1;Q1L838;P52701-2	P52701	MSH6;GTBP	DNA mismatch repair protein Msh6
0	1	11	1252.7	6.6936e-05	134.98	6290800	1	LANLPEEVIQK	P52701;P52701-4;P52701-3;A0A087WYT6;Q6LAI4	P52701	MSH6	DNA mismatch repair protein Msh6
0	1	13	1456.75	0.018663	76.868	623720	1	LDAIEDLMVVPDK	P52701;P52701-4;P52701-3;A0A087WWJ1;Q1L838;P52701-2	P52701	MSH6;GTBP	DNA mismatch repair protein Msh6
0	1	14	1468.83	1.3743e-07	154.23	14965000	2	LSDGIGVMLPQVLK	P52701;P52701-4;P52701-3;A0A087WWJ1;Q1L838;P52701-2	P52701	MSH6;GTBP	DNA mismatch repair protein Msh6
1	0	22	2784.26	0.033063	43.164	505230	1	MEGYPWWPCLVYNHPFDGTFIR	P52701;A0A087WWJ1;Q1L838;P52701-2;C9JH55;C9J8Y8;C9J7Y7;Q3SWU9;U3KQ72;F8WAX8	P52701	MSH6;GTBP	DNA mismatch repair protein Msh6
0	1	16	1820.03	2.5317e-10	168.93	17502000	2	PVILLPEDTPPFLELK	P52701;P52701-4;P52701-3;A0A087WYT6	P52701	MSH6	DNA mismatch repair protein Msh6
1	0	21	2323.09	0.0031507	72.21	545160	1	QAGLLAVMAQMGCYVPAEVCR	P52701;P52701-4;P52701-3;Q6LAI4	P52701	MSH6	DNA mismatch repair protein Msh6
0	1	8	915.539	0.036964	89.752	1890000	0	QVISLQTK	P52701;P52701-4;P52701-3;A0A087WWJ1;Q1L838;P52701-2	P52701	MSH6;GTBP	DNA mismatch repair protein Msh6
1	0	16	2029.93	0.0069261	76.311	2005100	1	QWLCAPLCNHYAINDR	P52701;P52701-4;P52701-3;A0A087WWJ1;Q1L838;P52701-2	P52701	MSH6;GTBP	DNA mismatch repair protein Msh6
0	1	11	1385.66	0.0025449	106.79	597350	1	SQNFDLVICYK	P52701;P52701-4;P52701-3;A0A087WWJ1;Q1L838;P52701-2	P52701	MSH6;GTBP	DNA mismatch repair protein Msh6
0	1	22	2396.13	0.019234	52.318	949690	1	SSLSCSLQEGLIPGSQFWDASK	P52701;P52701-4;P52701-3;A0A087WWJ1;Q1L838;P52701-2	P52701	MSH6;GTBP	DNA mismatch repair protein Msh6
1	0	8	884.414	0.010937	95.815	41245000	3	SYGFNAAR	P52701;P52701-4;P52701-3;A0A087WYT6;Q6LAI4	P52701	MSH6	DNA mismatch repair protein Msh6
1	0	9	1063.58	0.00042159	134.77	10812000	2	TIVYWGIGR	P52701;P52701-4;P52701-3;A0A087WWJ1;Q1L838;P52701-2	P52701	MSH6;GTBP	DNA mismatch repair protein Msh6
1	0	21	2465.2	5.79e-23	211.26	10795000	3	TLFSTHYHSLVEDYSQNVAVR	P52701;P52701-4;P52701-3	P52701	MSH6	DNA mismatch repair protein Msh6
1	0	9	1198.59	0.012161	86.882	18026000	1	TLLEEEYFR	P52701;P52701-4;P52701-3;A0A087WWJ1;Q1L838;P52701-2	P52701	MSH6;GTBP	DNA mismatch repair protein Msh6
0	1	15	1739.96	0.00019543	119.88	976340	2	TLVAHYPPVQVLFEK	P52701;P52701-4;P52701-3;A0A087WWJ1;Q1L838;P52701-2	P52701	MSH6;GTBP	DNA mismatch repair protein Msh6
1	0	12	1446.69	0.012603	69.815	1414200	1	VHVQFFDDSPTR	P52701;A0A087WWJ1;Q1L838;P52701-2;C9JH55;C9J8Y8;C9J7Y7;Q3SWU9;U3KQ72;F8WAX8	P52701	MSH6;GTBP	DNA mismatch repair protein Msh6
1	0	12	1509.75	0.0038395	98	30913000	3	YQLEIPENFTTR	P52701;P52701-4;P52701-3;A0A087WWJ1;Q1L838;P52701-2	P52701	MSH6;GTBP	DNA mismatch repair protein Msh6
0	1	8	938.471	0.0039411	115.7	25287000	2	YSDSLVQK	P52701;P52701-4;P52701-3;A0A087WWJ1;Q1L838;P52701-2	P52701	MSH6;GTBP	DNA mismatch repair protein Msh6
1	0	17	1683.9	7.2531e-15	196.18	11001000	1	AAVEEGIVLGGGCALLR	B3GQS7;A0A024R3X4;P10809;B7Z4F6;B7Z597;B7Z5E7	B3GQS7	HSPD1	60 kDa heat shock protein, mitochondrial
0	1	7	804.405	0.017319	100.74	10782000	1	DDAMLLK	B3GQS7;A0A024R3X4;P10809;B7Z4F6;B7Z5E7;B7Z532	B3GQS7	HSPD1	60 kDa heat shock protein, mitochondrial
1	0	8	854.461	0.025845	78.264	17411000	1	GANPVEIR	B3GQS7;A0A024R3X4;P10809;B7Z4F6;Q53SE2;E7ESH4;E7EXB4;A0A0S2Z415;B9VPB4;B9VP19;P10809-2;B9VP24	B3GQS7	HSPD1	60 kDa heat shock protein, mitochondrial
0	1	14	1427.81	6.2204e-05	131.32	3933900	1	GVMLAVDAVIAELK	B3GQS7;A0A024R3X4;P10809;B7Z4F6;B7Z597;Q53SE2;E7ESH4;E7EXB4	B3GQS7	HSPD1	60 kDa heat shock protein, mitochondrial
0	2	15	1555.9	6.3355e-05	135.86	4322900	1	GVMLAVDAVIAELKK	B3GQS7;A0A024R3X4;P10809;B7Z4F6;B7Z597;Q53SE2;E7ESH4;E7EXB4	B3GQS7	HSPD1	60 kDa heat shock protein, mitochondrial
0	1	12	1388.7	0.00059548	116.03	9997600	2	GYISPYFINTSK	B3GQS7;A0A024R3X4;P10809;B7Z4F6;B7Z597;B7Z5E7;Q53SE2;E7ESH4;B7Z532;B9VPB4;B9VP19	B3GQS7	HSPD1	60 kDa heat shock protein, mitochondrial
0	1	7	784.506	0.016854	101.64	9726600	1	IGIEIIK	B3GQS7;A0A024R3X4;P10809;B7Z4F6;B7Z597;B7Z5E7	B3GQS7	HSPD1	60 kDa heat shock protein, mitochondrial
0	1	8	843.489	0.021342	82.241	24300000	1	IPAMTIAK	B3GQS7;A0A024R3X4;P10809;B7Z4F6;B7Z597;B7Z5E7	B3GQS7	HSPD1	60 kDa heat shock protein, mitochondrial
1	0	18	1918.06	0.00045855	105.9	39713000	1	ISSIQSIVPALEIANAHR	B3GQS7;A0A024R3X4;P10809;B7Z4F6;B7Z597;B7Z5E7;B7Z532;Q53QD5	B3GQS7	HSPD1	60 kDa heat shock protein, mitochondrial
1	1	22	2364.33	0.0017629	77.899	5513600	2	KPLVIIAEDVDGEALSTLVLNR	B3GQS7;A0A024R3X4;P10809;B7Z4F6;B7Z597;B7Z5E7;B7Z532;B9VPB4;B9VP19	B3GQS7	HSPD1	60 kDa heat shock protein, mitochondrial
0	1	9	900.528	0.0026575	112.11	38598000	2	LSDGVAVLK	B3GQS7;A0A024R3X4;P10809;B7Z4F6;B7Z597;B7Z5E7	B3GQS7	HSPD1	60 kDa heat shock protein, mitochondrial
1	0	25	2559.24	0.023579	47.058	631700	1	LVQDVANNTNEEAGDGTTTATVLAR	B3GQS7;A0A024R3X4;P10809;B7Z597;Q53SE2;E7ESH4;E7EXB4;A0A0S2Z415;P10809-2;C9JL25	B3GQS7	HSPD1	60 kDa heat shock protein, mitochondrial
0	1	12	1214.65	2.3332e-18	204.32	17123000	2	NAGVEGSLIVEK	B3GQS7;A0A024R3X4;P10809;B7Z4F6;B7Z597;B7Z5E7	B3GQS7	HSPD1	60 kDa heat shock protein, mitochondrial
0	1	13	1503.75	1.5722e-32	253.06	23797000	2	TLNDELEIIEGMK	B3GQS7;A0A024R3X4;P10809;B7Z4F6;B7Z597;B7Z5E7;Q53SE2;E7ESH4;B7Z532;E7EXB4	B3GQS7	HSPD1	60 kDa heat shock protein, mitochondrial
0	1	12	1343.71	0.0054716	135.94	11261000	0	TVIIEQSWGSPK	B3GQS7;A0A024R3X4;P10809;B7Z597;B7Z5E7;Q53SE2;E7ESH4;E7EXB4;A0A0S2Z415;P10809-2;C9JL25;C9JL19;C9JCQ4	B3GQS7	HSPD1	60 kDa heat shock protein, mitochondrial
0	1	8	843.507	0.045771	93.598	16055000	0	VGEVIVTK	B3GQS7;A0A024R3X4;P10809;B7Z4F6;B7Z597;B7Z5E7;B7Z532	B3GQS7	HSPD1	60 kDa heat shock protein, mitochondrial
0	1	12	1232.59	0.0034551	100.02	11960000	1	VGGTSDVEVNEK	B3GQS7;A0A024R3X4;P10809;B7Z4F6;B7Z597;B7Z5E7	B3GQS7	HSPD1	60 kDa heat shock protein, mitochondrial
0	1	9	911.58	2.1772e-05	154.12	32315000	2	VGLQVVAVK	B3GQS7;A0A024R3X4;P10809;B7Z4F6;B7Z597;B7Z5E7;B7Z532	B3GQS7	HSPD1	60 kDa heat shock protein, mitochondrial
1	0	9	959.504	0.0033097	109.16	25597000	1	VTDALNATR	B3GQS7;A0A024R3X4;P10809;B7Z4F6;B7Z597;B7Z5E7	B3GQS7	HSPD1	60 kDa heat shock protein, mitochondrial
0	1	19	1939.92	9.9847e-27	222.93	1474200	1	AAEAGGAEEQYGFLTTPTK	A0A024RAM4;P46821;A2BDK6;Q5H9P1	A0A024RAM4	MAP1B;DKFZp686F1345	Microtubule-associated protein 1B;MAP1B heavy chain;MAP1 light chain LC1
0	1	31	2623.4	0.011001	45.878	278810	1	AAEAVAAAVGTGATTAAVMAAAGIAAIGPAK	A0A024RAM4;P46821;A2BDK6;Q5H9P1	A0A024RAM4	MAP1B;DKFZp686F1345	Microtubule-associated protein 1B;MAP1B heavy chain;MAP1 light chain LC1
1	0	10	1054.61	6.4025e-05	145.46	41627000	4	AIGNIELGIR	A0A024RAM4;P46821;Q05BW8;D6RA32;Q86X89;Q32NB7;Q6PJD3;A5D6X1;Q4VBY4;D6RCL2;D6RGJ3	A0A024RAM4	MAP1B	Microtubule-associated protein 1B;MAP1B heavy chain;MAP1 light chain LC1
0	1	14	1651.76	0.0081143	113.52	778110	2	ASLTLFCPEEGDWK	A0A024RAM4;P46821;A2BDK6;Q05BW8;D6RA32;Q86X89;Q32NB7;Q6PJD3;A5D6X1;Q4VBY4;D6RA40;A5D8X6	A0A024RAM4	MAP1B	Microtubule-associated protein 1B;MAP1B heavy chain;MAP1 light chain LC1
1	0	16	1851.94	0.00029744	115.12	45912000	3	ASVLFDTMQHHLALNR	A0A024RAM4;P46821;A2BDK6;Q5H9P1	A0A024RAM4	MAP1B;DKFZp686F1345	Microtubule-associated protein 1B;MAP1B heavy chain;MAP1 light chain LC1
0	1	10	1027.59	0.0030705	106.62	1802200	2	AVLDALLEGK	A0A024RAM4;P46821;A2BDK6;Q5H9P1;E9PGC8;P78559;P78559-2	A0A024RAM4	MAP1B;DKFZp686F1345;MAP1A	Microtubule-associated protein 1B;MAP1B heavy chain;MAP1 light chain LC1;Microtubule-associated protein 1A;MAP1A heavy chain;MAP1 light chain LC2
0	1	10	1021.49	0.020888	76.332	4417000	2	DSISAVSSEK	A0A024RAM4;P46821;A2BDK6;Q5H9P1	A0A024RAM4	MAP1B;DKFZp686F1345	Microtubule-associated protein 1B;MAP1B heavy chain;MAP1 light chain LC1
0	3	13	1364.8	0.045746	68.676	380020	1	ESLKPAAKPLPSK	A0A024RAM4;P46821;A2BDK6;Q05BW8;D6RA32;Q86X89;Q32NB7;Q6PJD3;A5D6X1;Q4VBY4;D6RA40;A5D8X6	A0A024RAM4	MAP1B	Microtubule-associated protein 1B;MAP1B heavy chain;MAP1 light chain LC1
0	1	10	1240.66	5.8058e-09	183.85	12627000	3	HNLQDFINIK	A0A024RAM4;P46821;A2BDK6;Q05BW8;D6RA32;Q86X89;Q32NB7;Q6PJD3;A5D6X1;Q4VBY4;D6RA40;A5D8X6	A0A024RAM4	MAP1B	Microtubule-associated protein 1B;MAP1B heavy chain;MAP1 light chain LC1
0	1	17	1924.86	1.8506e-50	290.63	27823000	3	ITSFPESEGYSYETSTK	A0A024RAM4;P46821;A2BDK6;Q5H9P1	A0A024RAM4	MAP1B;DKFZp686F1345	Microtubule-associated protein 1B;MAP1B heavy chain;MAP1 light chain LC1
0	1	10	1204.65	0.0015196	113.93	7562000	2	LEMYVLNPVK	A0A024RAM4;P46821;A2BDK6;Q05BW8;D6RA32;Q86X89;Q32NB7;Q6PJD3;A5D6X1;Q4VBY4;D6RA40;A5D8X6	A0A024RAM4	MAP1B	Microtubule-associated protein 1B;MAP1B heavy chain;MAP1 light chain LC1
0	1	18	1923.96	0.0062798	79.332	549370	1	LGDVSPTQIDVSQFGSFK	A0A024RAM4;P46821;A2BDK6;Q5H9P1	A0A024RAM4	MAP1B;DKFZp686F1345	Microtubule-associated protein 1B;MAP1B heavy chain;MAP1 light chain LC1
1	1	10	1216.66	0.0031743	106.88	13645000	2	LSMKPEPLFR	A0A024RAM4;P46821;A2BDK6;Q05BW8;D6RA32;Q86X89;Q32NB7;Q6PJD3;A5D6X1;Q4VBY4;D6RA40;A5D8X6	A0A024RAM4	MAP1B	Microtubule-associated protein 1B;MAP1B heavy chain;MAP1 light chain LC1
0	1	13	1498.67	4.3949e-07	149.82	3404800	1	MEAEDYVMAVVDK	A0A024RAM4;P46821;A2BDK6;Q5H9P1	A0A024RAM4	MAP1B;DKFZp686F1345	Microtubule-associated protein 1B;MAP1B heavy chain;MAP1 light chain LC1
0	1	19	2080.16	2.6176e-27	234.62	7295100	6	NLISPDLGVVFLNVPENLK	A0A024RAM4;P46821;A2BDK6;Q05BW8;D6RA32;Q86X89;Q32NB7;Q6PJD3;A5D6X1;Q4VBY4;D6RA40;A5D8X6	A0A024RAM4	MAP1B	Microtubule-associated protein 1B;MAP1B heavy chain;MAP1 light chain LC1
0	1	8	996.492	0.034	74.173	13830000	2	NVDVEFFK	A0A024RAM4;P46821;A2BDK6;Q5H9P1	A0A024RAM4	MAP1B;DKFZp686F1345	Microtubule-associated protein 1B;MAP1B heavy chain;MAP1 light chain LC1
0	1	14	1714.75	1.1209e-32	252.52	8049100	2	QDVDLCLVSSCEYK	A0A024RAM4;P46821;A2BDK6;Q5H9P1	A0A024RAM4	MAP1B;DKFZp686F1345	Microtubule-associated protein 1B;MAP1B heavy chain;MAP1 light chain LC1
0	1	14	1489.66	1.6068e-32	250.81	32279000	3	SPSDSGYSYETIGK	A0A024RAM4;P46821;A2BDK6;Q5H9P1	A0A024RAM4	MAP1B;DKFZp686F1345	Microtubule-associated protein 1B;MAP1B heavy chain;MAP1 light chain LC1
1	0	18	1926.86	8.3404e-08	156.13	2154000	2	SSYYVVSGNDPAAEEPSR	A0A024RAM4;P46821;A2BDK6;Q5H9P1	A0A024RAM4	MAP1B;DKFZp686F1345	Microtubule-associated protein 1B;MAP1B heavy chain;MAP1 light chain LC1
0	1	14	1529.85	3.7692e-49	288.29	23248000	5	SVGNTIDPVILFQK	A0A024RAM4;P46821;A2BDK6;Q05BW8;D6RA32;Q86X89;Q32NB7;Q6PJD3;A5D6X1;Q4VBY4;D6RA40;A5D8X6	A0A024RAM4	MAP1B	Microtubule-associated protein 1B;MAP1B heavy chain;MAP1 light chain LC1
0	1	12	1347.7	1.4475e-05	141.37	9097000	2	SVNFSLTPNEIK	A0A024RAM4;P46821;A2BDK6;Q5H9P1	A0A024RAM4	MAP1B;DKFZp686F1345	Microtubule-associated protein 1B;MAP1B heavy chain;MAP1 light chain LC1
0	1	28	2964.4	0.0442	33.263	1464900	1	TLEVVSPSQSVTGSAGHTPYYQSPTDEK	A0A024RAM4;P46821;A2BDK6;Q5H9P1	A0A024RAM4	MAP1B;DKFZp686F1345	Microtubule-associated protein 1B;MAP1B heavy chain;MAP1 light chain LC1
0	1	14	1664.69	1.4631e-14	190.57	10754000	2	TPDTSTYCYETAEK	A0A024RAM4;P46821;A2BDK6;Q5H9P1	A0A024RAM4	MAP1B;DKFZp686F1345	Microtubule-associated protein 1B;MAP1B heavy chain;MAP1 light chain LC1
0	1	14	1657.74	1.2082e-25	232.37	35459000	3	TPEDGDYSYEIIEK	A0A024RAM4;P46821;A2BDK6;Q5H9P1	A0A024RAM4	MAP1B;DKFZp686F1345	Microtubule-associated protein 1B;MAP1B heavy chain;MAP1 light chain LC1
0	1	14	1573.68	1.3315e-21	220.97	27005000	3	TPEEGGYSYDISEK	A0A024RAM4;P46821;A2BDK6;Q5H9P1	A0A024RAM4	MAP1B;DKFZp686F1345	Microtubule-associated protein 1B;MAP1B heavy chain;MAP1 light chain LC1
1	1	17	1988.91	1.2185e-05	144.4	52613000	2	TPGDFSYAYQKPEETTR	A0A024RAM4;P46821;A2BDK6;Q5H9P1	A0A024RAM4	MAP1B;DKFZp686F1345	Microtubule-associated protein 1B;MAP1B heavy chain;MAP1 light chain LC1
0	1	14	1543.7	0.016597	78.505	16108000	2	TTSPPEVSGYSYEK	A0A024RAM4;P46821;A2BDK6;Q5H9P1	A0A024RAM4	MAP1B;DKFZp686F1345	Microtubule-associated protein 1B;MAP1B heavy chain;MAP1 light chain LC1
1	0	23	2520.3	2.0543e-08	137.13	8040200	2	VDSILLTHIGDDNLPGINSMLQR	A0A024RAM4;P46821;A2BDK6;Q05BW8;D6RA32;Q86X89;Q32NB7;Q6PJD3;A5D6X1;Q4VBY4;D6RA40;A5D8X6	A0A024RAM4	MAP1B	Microtubule-associated protein 1B;MAP1B heavy chain;MAP1 light chain LC1
0	1	18	2021.05	2.3466e-20	214.46	25840000	5	VLFPGNSTQYNILEGLEK	A0A024RAM4;P46821;A2BDK6;Q05BW8;D6RA32;Q86X89;Q32NB7;Q6PJD3;A5D6X1;Q4VBY4;D6RA40;A5D8X6	A0A024RAM4	MAP1B	Microtubule-associated protein 1B;MAP1B heavy chain;MAP1 light chain LC1
0	1	12	1271.76	1.5509e-07	157.38	18480000	2	AFAVGVQQVLLK	O95373	O95373	IPO7	Importin-7
1	0	9	1089.59	2.3131e-05	153.24	31504000	2	AIFQTIQNR	O95373;B3KQG6;B3KNG9	O95373	IPO7	Importin-7
0	1	16	1679.93	4.3445e-26	235.93	9033900	4	DGALHMIGSLAEILLK	O95373;B3KQG6	O95373	IPO7	Importin-7
1	0	23	2834.29	0.00026087	87.356	4763600	1	DQMEYMLQNHVFPLFSSELGYMR	O95373;B3KQG6	O95373	IPO7	Importin-7
1	0	15	1731.95	6.0756e-40	261.61	33821000	4	ENIVEAIIHSPELIR	O95373;E9PLB2	O95373	IPO7	Importin-7
0	1	13	1517.72	3.2683e-09	167.22	14184000	2	ETENDDLTNVIQK	O95373;B3KQG6	O95373	IPO7	Importin-7
0	1	11	1387.67	6.9317e-09	168.98	23155000	3	EYNEFAEVFLK	O95373	O95373	IPO7	Importin-7
1	0	16	1829.93	1.0824e-10	178.51	14631000	3	GIDQCIPLFVEAALER	O95373;B3KQG6	O95373	IPO7	Importin-7
0	1	10	1227.73	2.8484e-05	148.56	14627000	2	LLEVIILQCK	O95373;B3KQG6;Q59F59;O15397-2;O15397	O95373	IPO7;IPO8	Importin-7;Importin-8
1	0	11	1271.65	0.025615	79.089	4096000	2	MDPNTIIEALR	O95373;E9PLJ0	O95373	IPO7	Importin-7
0	2	26	2967.44	0.0022321	76.909	5475200	1	MKFDVFEDFISPTTAAQTLLFTACSK	O95373;B3KQG6	O95373	IPO7	Importin-7
1	0	17	2054	9.4629e-05	126.63	52946000	3	NPVWYQALTHGLNEEQR	O95373;B3KQG6;B3KNG9	O95373	IPO7	Importin-7
0	1	15	1649.93	4.8197e-32	240.73	59888000	4	SPLVAAMQHFLPVLK	O95373;E9PLB2	O95373	IPO7	Importin-7
1	0	8	978.576	0.015882	79.451	25145000	2	WALHILAR	O95373	O95373	IPO7	Importin-7
1	0	15	1933.82	0.00043359	121.42	467990	1	FECSEEEVLSCLYNR	Q13131;Q13131-2	Q13131	PRKAA1	5-AMP-activated protein kinase catalytic subunit alpha-1
0	1	21	2440.27	2.5751e-13	181.32	3259300	3	ICDGIFYTPQYLNPSVISLLK	Q13131;Q13131-2	Q13131	PRKAA1	5-AMP-activated protein kinase catalytic subunit alpha-1
0	1	17	1746.93	0.029907	51.466	1252500	1	IGHYILGDTLGVGTFGK	Q13131;Q13131-2;Q96E92	Q13131	PRKAA1	5-AMP-activated protein kinase catalytic subunit alpha-1
1	0	14	1734.85	0.0045713	85.287	12278000	2	LFQQILSGVDYCHR	Q13131;Q13131-2;Q96E92	Q13131	PRKAA1	5-AMP-activated protein kinase catalytic subunit alpha-1
1	0	17	1988.02	0.0010075	101.2	644190	1	NHQDPLAVAYHLIIDNR	Q13131;Q13131-2	Q13131	PRKAA1	5-AMP-activated protein kinase catalytic subunit alpha-1
2	0	14	1661.76	0.04253	64.313	767260	1	SQSRPNDIMAEVCR	Q13131;Q13131-2	Q13131	PRKAA1	5-AMP-activated protein kinase catalytic subunit alpha-1
1	0	17	1764.81	0.0053148	91.14	1521000	1	TSCGSPNYAAPEVISGR	Q13131;Q13131-2;Q96E92;B2RA25;A0MZF5;A0A087WXX9;P54646	Q13131	PRKAA1;PRKAA2	5-AMP-activated protein kinase catalytic subunit alpha-1;5-AMP-activated protein kinase catalytic subunit alpha-2
1	0	10	1127.63	0.001749	112.85	9949900	1	VPFLVAETPR	Q13131;Q13131-2	Q13131	PRKAA1	5-AMP-activated protein kinase catalytic subunit alpha-1
0	1	12	1375.75	0.00022341	117.09	17125000	2	ADVFHAYLSLLK	A8K8U1;Q86VP6-2;Q86VP6;A0A0C4DGH5;H0YH27;Q86VP6-3	A8K8U1	CAND1	Cullin-associated NEDD8-dissociated protein 1
0	1	11	1082.67	0.031907	69.815	473630	1	ALTLIAGSPLK	A8K8U1;Q86VP6-2;Q86VP6;A0A0C4DGH5	A8K8U1	CAND1	Cullin-associated NEDD8-dissociated protein 1
1	0	12	1547.71	2.7627e-05	133.15	8432500	1	EYCIQAFESFVR	A8K8U1;Q86VP6-2;Q86VP6;H0YH27;Q86VP6-3	A8K8U1	CAND1	Cullin-associated NEDD8-dissociated protein 1
0	1	15	1719.92	0.036554	49.356	8578800	1	FTISDHPQPIDPLLK	A8K8U1;Q86VP6-2;Q86VP6;A0A0C4DGH5;B3KMG3	A8K8U1	CAND1	Cullin-associated NEDD8-dissociated protein 1
1	0	14	1482.88	0.037444	78.705	1212900	0	ISGSILNELIGLVR	A8K8U1;Q86VP6-2;Q86VP6;A0A0C4DGH5	A8K8U1	CAND1	Cullin-associated NEDD8-dissociated protein 1
1	0	12	1379.8	0.0045429	96.23	6424400	3	LTLIDPETLLPR	A8K8U1;Q86VP6-2;Q86VP6;A0A0C4DGH5;B3KMG3	A8K8U1	CAND1	Cullin-associated NEDD8-dissociated protein 1
1	0	12	1285.69	0.020128	83.182	7672700	3	AGTVVLDDVELR	Q53HJ4;B2R7C5;A0A0S2Z4T1;P25205;Q8NHX6;A0A0S2Z492	Q53HJ4	MCM3;HCC5	DNA helicase;DNA replication licensing factor MCM3
1	0	12	1312.75	1.1482e-14	201.09	25321000	3	AILCLLLGGVER	Q53HJ4;B2R7C5;A0A0S2Z4T1;P25205;Q8NHX6;A0A0S2Z492;P25205-2;B4DUQ9;J3KQ69;B4DS46	Q53HJ4	MCM3;HCC5	DNA helicase;DNA replication licensing factor MCM3
1	0	13	1376.69	0.0013579	121.21	638000	0	CSVLAAANPVYGR	Q53HJ4;B2R7C5;A0A0S2Z4T1;P25205;Q8NHX6;A0A0S2Z492;P25205-2;B4DUQ9;J3KQ69;B4DS46	Q53HJ4	MCM3;HCC5	DNA helicase;DNA replication licensing factor MCM3
0	1	12	1299.63	0.025606	83.182	484530	0	DFVASIDATYAK	Q53HJ4;B2R7C5;A0A0S2Z4T1;P25205;Q8NHX6;A0A0S2Z492;P25205-2;B4DUQ9;J3KQ69;B4DS46	Q53HJ4	MCM3;HCC5	DNA helicase;DNA replication licensing factor MCM3
1	0	9	1136.55	0.0050106	101.46	944850	1	ELISDNQYR	Q53HJ4;B2R7C5;A0A0S2Z4T1;P25205;Q8NHX6;A0A0S2Z492;P25205-2	Q53HJ4	MCM3;HCC5	DNA helicase;DNA replication licensing factor MCM3
0	1	15	1523.86	1.4608e-07	157.91	10007000	1	GDINILLIGDPSVAK	Q53HJ4;B2R7C5;A0A0S2Z4T1;P25205;Q8NHX6;A0A0S2Z492;P25205-2;B4DUQ9;J3KQ69;B4DS46	Q53HJ4	MCM3;HCC5	DNA helicase;DNA replication licensing factor MCM3
1	1	20	2310.21	0.0011258	93.115	38325000	1	IIKPVLTQESATYIAEEYSR	Q53HJ4;B2R7C5;A0A0S2Z4T1;P25205;Q8NHX6;A0A0S2Z492;P25205-2;B4DUQ9;J3KQ69;B4DS46;Q7Z6P5	Q53HJ4	MCM3;HCC5	DNA helicase;DNA replication licensing factor MCM3
1	0	9	1054.61	9.1419e-05	147.75	28661000	2	LIVNVNDLR	Q53HJ4;B2R7C5;A0A0S2Z4T1;P25205;Q8NHX6;A0A0S2Z492;P25205-2	Q53HJ4	MCM3;HCC5	DNA helicase;DNA replication licensing factor MCM3
1	0	14	1662.87	1.2916e-19	211.82	12136000	4	LLNNAFEELVAFQR	Q53HJ4;B2R7C5;A0A0S2Z4T1;P25205;Q8NHX6;A0A0S2Z492;P25205-2;B4DUQ9;J3KQ69	Q53HJ4	MCM3;HCC5	DNA helicase;DNA replication licensing factor MCM3
0	1	13	1422.73	0.047528	42.083	12643000	1	SLAPSIHGHDYVK	Q53HJ4;B2R7C5;A0A0S2Z4T1;P25205;Q8NHX6;A0A0S2Z492;P25205-2;B4DUQ9;J3KQ69;B4DS46	Q53HJ4	MCM3;HCC5	DNA helicase;DNA replication licensing factor MCM3
1	0	11	1269.61	0.0098367	73.951	8151000	2	TAIHEVMEQGR	Q53HJ4;B2R7C5;A0A0S2Z4T1;P25205;Q8NHX6;A0A0S2Z492;P25205-2;B4DUQ9;J3KQ69;B4DS46	Q53HJ4	MCM3;HCC5	DNA helicase;DNA replication licensing factor MCM3
0	1	19	2172.06	0.036311	44.539	4673700	1	TLTSCFLSCVVCVEGIVTK	Q53HJ4;B2R7C5;A0A0S2Z4T1;P25205;Q8NHX6;A0A0S2Z492;P25205-2;B4DUQ9;J3KQ69;B4DS46	Q53HJ4	MCM3;HCC5	DNA helicase;DNA replication licensing factor MCM3
1	0	8	931.549	0.0023202	125.31	35486000	6	VALLDVFR	Q53HJ4;B2R7C5;A0A0S2Z4T1;P25205;P25205-2;B4DUQ9;J3KQ69;B4DS46	Q53HJ4	MCM3	DNA helicase;DNA replication licensing factor MCM3
0	1	19	2075.05	0.017754	66.152	289840	1	YSDLTTLVAFPSSSVYPTK	Q53HJ4;B2R7C5;A0A0S2Z4T1;P25205;Q8NHX6;A0A0S2Z492;P25205-2;B4DUQ9;J3KQ69;B4DS46	Q53HJ4	MCM3;HCC5	DNA helicase;DNA replication licensing factor MCM3
1	0	8	978.496	0.041808	70.256	5896200	1	YVLCTAPR	Q53HJ4;B2R7C5;A0A0S2Z4T1;P25205;Q8NHX6;A0A0S2Z492;P25205-2;B4DUQ9;J3KQ69;B4DS46	Q53HJ4	MCM3;HCC5	DNA helicase;DNA replication licensing factor MCM3
0	1	9	916.487	0.00080209	128.91	99642000	2	DGVVEITGK	V9HW43;P04792;B4DL87	V9HW43	HEL-S-102;HSPB1	Heat shock protein beta-1
1	0	7	959.425	0.024645	84.916	493910000	7	DWYPHSR	V9HW43;P04792;F8WE04	V9HW43	HEL-S-102;HSPB1	Heat shock protein beta-1
1	0	8	960.445	0.0033491	119.21	373650000	7	GPSWDPFR	V9HW43;P04792;F8WE04	V9HW43	HEL-S-102;HSPB1	Heat shock protein beta-1
2	0	15	1901.86	0.0039462	107.46	104400000	4	GPSWDPFRDWYPHSR	V9HW43;P04792;F8WE04	V9HW43	HEL-S-102;HSPB1	Heat shock protein beta-1
0	2	31	3225.65	5.0617e-11	147.17	131360000	4	KYTLPPGVDPTQVSSSLSPEGTLTVEAPMPK	V9HW43;P04792;B4DL87	V9HW43	HEL-S-102;HSPB1	Heat shock protein beta-1
1	0	17	1904.98	6.9207e-26	231.06	555800000	8	LATQSNEITIPVTFESR	V9HW43;P04792;B4DL87;C9J3N8	V9HW43	HEL-S-102;HSPB1	Heat shock protein beta-1
1	0	10	1162.61	1.4521e-11	197.21	827600000	12	LFDQAFGLPR	V9HW43;P04792;F8WE04	V9HW43	HEL-S-102;HSPB1	Heat shock protein beta-1
1	0	19	2233.06	2.9382e-43	273.43	120610000	8	LPEEWSQWLGGSSWPGYVR	V9HW43;P04792;F8WE04	V9HW43	HEL-S-102;HSPB1	Heat shock protein beta-1
2	0	38	4092.05	9.1114e-10	109.17	85900000	9	LPEEWSQWLGGSSWPGYVRPLPPAAIESPAVAAPAYSR	V9HW43;P04792;F8WE04	V9HW43	HEL-S-102;HSPB1	Heat shock protein beta-1
1	0	19	1877	5.4478e-07	149.42	105670000	8	PLPPAAIESPAVAAPAYSR	V9HW43;P04792;F8WE04;B4DL87	V9HW43	HEL-S-102;HSPB1	Heat shock protein beta-1
1	0	10	1074.57	0.00067189	125.23	707780000	8	QLSSGVSEIR	V9HW43;P04792;F8WE04;B4DL87	V9HW43	HEL-S-102;HSPB1	Heat shock protein beta-1
0	2	11	1145.63	0.0002146	141.34	283270000	6	TKDGVVEITGK	V9HW43;P04792;B4DL87	V9HW43	HEL-S-102;HSPB1	Heat shock protein beta-1
1	0	7	830.501	0.0066385	124.59	116680000	2	VPFSLLR	V9HW43;P04792;F8WE04;B4DL87	V9HW43	HEL-S-102;HSPB1	Heat shock protein beta-1
0	1	16	1782.92	3.4568e-40	260.08	1089200000	12	VSLDVNHFAPDELTVK	V9HW43;P04792;F8WE04;B4DL87	V9HW43	HEL-S-102;HSPB1	Heat shock protein beta-1
0	1	30	3097.55	4.0951e-06	106.38	2749400	2	YTLPPGVDPTQVSSSLSPEGTLTVEAPMPK	V9HW43;P04792;B4DL87	V9HW43	HEL-S-102;HSPB1	Heat shock protein beta-1
1	1	25	2654.32	2.8677e-06	115.02	61412000	2	DGNASGTTLLEALDCILPPTRPTDK	Q6IPT9;Q6IPS9;Q6IPN6;Q53HR5;Q53HQ7;Q53HM9;Q53GE9;Q53G85;P68104;A8K9C4;Q5VTE0;Q96RE1;A0A087WVQ9;Q53GA1;P68104-2;B4DNE0;B4DV42;Q8IUB0;Q53HR1;A0A087WV01;Q9H2I7;Q53G89;Q96CD8;Q6P4C9;Q504Z0;Q96C29;Q8TBL1;Q6P082;Q16577	Q6IPT9	EEF1A1;EEF1A1P5;EEF1A1L14;PTI-1	Elongation factor 1-alpha;Elongation factor 1-alpha 1;Putative elongation factor 1-alpha-like 3
2	1	28	3020.56	3.7967e-07	128.95	513930000	7	DGNASGTTLLEALDCILPPTRPTDKPLR	Q6IPT9;Q6IPS9;Q6IPN6;Q53HR5;Q53HQ7;Q53HM9;Q53GE9;Q53G85;P68104;A8K9C4;Q5VTE0;Q96RE1;A0A087WVQ9;Q53GA1;P68104-2;B4DNE0;B4DV42;Q8IUB0;Q53HR1;A0A087WV01;Q9H2I7;Q53G89;Q96CD8;Q6P4C9;Q504Z0;Q96C29;Q8TBL1;Q6P082	Q6IPT9	EEF1A1;EEF1A1P5;EEF1A1L14	Elongation factor 1-alpha;Elongation factor 1-alpha 1;Putative elongation factor 1-alpha-like 3
0	1	12	1313.73	2.4457e-18	203.51	1846700000	17	EHALLAYTLGVK	Q6IPT9;Q6IPS9;Q6IPN6;Q53HR5;Q53HQ7;Q53HM9;Q53GE9;Q53G85;P68104;A8K9C4;Q5VTE0;Q96RE1;Q53GA1;B4DV42;Q8IUB0;Q53HR1;Q9NZS6;A0A087WV01;Q9H2I7;Q53G89;Q16577;Q05639;A9X7H1;Q59GP5	Q6IPT9	EEF1A1;EEF1A1P5;EEF1A1L14;PTI-1;EEF1A2	Elongation factor 1-alpha;Elongation factor 1-alpha 1;Putative elongation factor 1-alpha-like 3;Elongation factor 1-alpha 2
0	1	10	1144.65	0.022573	90.827	420580	0	GITIDISLWK	Q6IPT9;Q6IPS9;Q6IPN6;Q53HR5;Q53HQ7;Q53HM9;Q53GE9;Q53G85;P68104;A8K9C4;Q5VTE0;Q96RE1;A0A087WVQ9;Q53GA1;P68104-2;B4DNE0;B4DV42;Q9NZS6;A0A087WV01;Q9H2I7;Q53G89;Q16577;Q05639;Q59GP5;Q5JR01;A6PW80;Q6NSH7	Q6IPT9	EEF1A1;EEF1A1P5;EEF1A1L14;PTI-1;EEF1A2	Elongation factor 1-alpha;Elongation factor 1-alpha 1;Putative elongation factor 1-alpha-like 3;Elongation factor 1-alpha 2
1	0	11	1024.6	1.1845e-05	147.91	2767500000	15	IGGIGTVPVGR	Q6IPT9;Q6IPS9;Q6IPN6;Q53HR5;Q53HQ7;Q53HM9;Q53GE9;Q53G85;P68104;A8K9C4;Q5VTE0;Q96RE1;A0A087WVQ9;Q53GA1;P68104-2;B4DNE0;Q8IUB0;Q53HR1;Q9NZS6;Q53G89;Q96CD8;Q6P4C9;Q504Z0;Q96C29;Q8TBL1;Q6P082;B4E2C5;Q16577;Q05639;Q59GP5;Q14222	Q6IPT9	EEF1A1;EEF1A1P5;EEF1A1L14;PTI-1;EEF1A2;EEF1A	Elongation factor 1-alpha;Elongation factor 1-alpha 1;Putative elongation factor 1-alpha-like 3;Elongation factor 1-alpha 2
0	1	32	3566.66	2.9598e-05	82.665	29562000	7	IGYNPDTVAFVPISGWNGDNMLEPSANMPWFK	Q6IPT9;Q6IPS9;Q6IPN6;Q53HR5;Q53HQ7;Q53HM9;Q53GE9;Q53G85;P68104;A8K9C4;Q5VTE0;Q96RE1;A0A087WVQ9;Q53GA1;P68104-2;B4DV42;Q8IUB0;Q53HR1;Q9NZS6;A0A087WV01;Q9H2I7;Q53G89;Q96CD8;Q6P4C9;Q504Z0;B4E2C5;Q16577;A9X7H1	Q6IPT9	EEF1A1;EEF1A1P5;EEF1A1L14;PTI-1	Elongation factor 1-alpha;Elongation factor 1-alpha 1;Putative elongation factor 1-alpha-like 3
1	2	26	2782.42	8.4802e-09	133.17	16112000	3	KDGNASGTTLLEALDCILPPTRPTDK	Q6IPT9;Q6IPS9;Q6IPN6;Q53HR5;Q53HQ7;Q53HM9;Q53GE9;Q53G85;P68104;A8K9C4;Q5VTE0;Q96RE1;A0A087WVQ9;Q53GA1;P68104-2;B4DNE0;B4DV42;Q8IUB0;Q53HR1;A0A087WV01;Q9H2I7;Q53G89;Q96CD8;Q6P4C9;Q504Z0;Q96C29;Q8TBL1;Q6P082;Q16577	Q6IPT9	EEF1A1;EEF1A1P5;EEF1A1L14;PTI-1	Elongation factor 1-alpha;Elongation factor 1-alpha 1;Putative elongation factor 1-alpha-like 3
0	1	8	974.544	0.0007764	138.4	3342100000	13	LPLQDVYK	Q6IPT9;Q6IPS9;Q6IPN6;Q53HR5;Q53HQ7;Q53HM9;Q53GE9;Q53G85;P68104;A8K9C4;Q5VTE0;Q96RE1;A0A087WVQ9;Q53GA1;P68104-2;B4DNE0;B4DV42;Q8IUB0;Q53HR1;Q9NZS6;A0A087WV01;Q9H2I7;Q96CD8;Q6P4C9;Q504Z0;Q96C29;Q8TBL1;Q6P082;B4E2C5;Q05639;A9X7H1;Q59GP5	Q6IPT9	EEF1A1;EEF1A1P5;EEF1A1L14;EEF1A2	Elongation factor 1-alpha;Elongation factor 1-alpha 1;Putative elongation factor 1-alpha-like 3;Elongation factor 1-alpha 2
0	1	41	4384.12	2.6228e-08	83.225	389790000	10	NDPPMEAAGFTAQVIILNHPGQISAGYAPVLDCHTAHIACK	Q6IPT9;Q6IPS9;Q6IPN6;Q53HR5;Q53HQ7;Q53HM9;Q53GE9;Q53G85;P68104;A8K9C4;Q96RE1;A0A087WVQ9;Q53GA1;P68104-2;B4DNE0;B4DV42;Q8IUB0;Q53HR1;Q9NZS6;A0A087WV01;Q9H2I7;Q96CD8;Q6P4C9;Q504Z0;Q96C29;Q8TBL1;Q6P082;B4E2C5;Q96EB3	Q6IPT9	EEF1A1;EEF1A1L14	Elongation factor 1-alpha;Elongation factor 1-alpha 1
0	1	29	2908.43	1.2887e-18	177.3	59608000	11	NMITGTSQADCAVLIVAAGVGEFEAGISK	Q6IPT9;Q6IPS9;Q6IPN6;Q53HR5;Q53HQ7;Q53HM9;Q53GE9;Q53G85;P68104;A8K9C4;Q5VTE0;Q96RE1;A0A087WVQ9;Q53GA1;P68104-2;B4DNE0;B4DV42;Q53HR1;Q9NZS6;A0A087WV01;Q9H2I7;Q53G89;Q05639;A9X7H1;Q59GP5;Q5JR01	Q6IPT9	EEF1A1;EEF1A1P5;EEF1A1L14;EEF1A2	Elongation factor 1-alpha;Elongation factor 1-alpha 1;Putative elongation factor 1-alpha-like 3;Elongation factor 1-alpha 2
0	1	17	1787.95	0.0038055	96.208	7071100	2	PGMVVTFAPVNVTTEVK	Q6IPT9;Q6IPS9;Q6IPN6;Q53HR5;Q53HQ7;Q53HM9;Q53GE9;Q53G85;P68104;A8K9C4;Q5VTE0;Q96RE1;A0A087WVQ9;P68104-2;B4DNE0;B4DV42;Q8IUB0;Q53HR1;Q9NZS6;Q53G89;Q96CD8;Q6P4C9;Q504Z0;Q96C29;Q8TBL1;Q6P082;B4E2C5;Q14222	Q6IPT9	EEF1A1;EEF1A1P5;EEF1A1L14;EEF1A	Elongation factor 1-alpha;Elongation factor 1-alpha 1;Putative elongation factor 1-alpha-like 3
1	1	11	1340.78	7.5336e-05	133.89	1974600	1	PLRLPLQDVYK	Q6IPT9;Q6IPS9;Q6IPN6;Q53HR5;Q53HQ7;Q53HM9;Q53GE9;Q53G85;P68104;A8K9C4;Q5VTE0;Q96RE1;A0A087WVQ9;Q53GA1;P68104-2;B4DNE0;B4DV42;Q8IUB0;Q53HR1;Q9NZS6;A0A087WV01;Q9H2I7;Q96CD8;Q6P4C9;Q504Z0;Q96C29;Q8TBL1;Q6P082;B4E2C5;Q05639;A9X7H1;Q59GP5	Q6IPT9	EEF1A1;EEF1A1P5;EEF1A1L14;EEF1A2	Elongation factor 1-alpha;Elongation factor 1-alpha 1;Putative elongation factor 1-alpha-like 3;Elongation factor 1-alpha 2
1	0	15	1753.78	1.2925e-14	195.1	54682000	3	PMCVESFSDYPPLGR	Q6IPT9;Q6IPS9;Q6IPN6;Q53HR5;Q53HQ7;Q53HM9;Q53GE9;Q53G85;P68104;A8K9C4;Q5VTE0;Q96RE1;A0A087WVQ9;Q53GA1;P68104-2;B4DNE0;B4DV42;Q8IUB0;Q53HR1;Q9NZS6;Q53G89;Q96CD8;Q6P4C9;Q504Z0;Q96C29;Q8TBL1;Q6P082;B4E2C5;Q96EB3;Q14222;Q2F837	Q6IPT9	EEF1A1;EEF1A1P5;EEF1A1L14;EEF1A	Elongation factor 1-alpha;Elongation factor 1-alpha 1;Putative elongation factor 1-alpha-like 3
0	1	8	869.533	0.0028493	122.18	1406300000	4	QLIVGVNK	Q6IPT9;Q6IPS9;Q6IPN6;Q53HR5;Q53HQ7;Q53HM9;Q53GE9;Q53G85;P68104;A8K9C4;Q5VTE0;Q96RE1;Q53GA1;B4DV42;Q8IUB0;Q53HR1;Q9NZS6;A0A087WV01;Q9H2I7;Q53G89;Q16577;Q05639;A9X7H1;Q59GP5	Q6IPT9	EEF1A1;EEF1A1P5;EEF1A1L14;PTI-1;EEF1A2	Elongation factor 1-alpha;Elongation factor 1-alpha 1;Putative elongation factor 1-alpha-like 3;Elongation factor 1-alpha 2
0	1	9	913.56	0.0012953	123.35	1986300000	3	QTVAVGVIK	Q6IPT9;Q6IPS9;Q6IPN6;Q53HR5;Q53HQ7;Q53HM9;Q53GE9;Q53G85;P68104;A8K9C4;Q5VTE0;Q96RE1;A0A087WVQ9;Q53GA1;P68104-2;B4DNE0;B4DV42;Q8IUB0;Q53HR1;Q9NZS6;Q53G89;Q96CD8;Q6P4C9;Q504Z0;Q96C29;Q8TBL1;Q6P082;B4E2C5;Q16577;Q05639;Q96EB3;Q14222;Q2F837	Q6IPT9	EEF1A1;EEF1A1P5;EEF1A1L14;PTI-1;EEF1A2;EEF1A	Elongation factor 1-alpha;Elongation factor 1-alpha 1;Putative elongation factor 1-alpha-like 3;Elongation factor 1-alpha 2
0	1	13	1258.62	0.00032093	120.59	94872000	4	SGDAAIVDMVPGK	Q6IPT9;Q6IPS9;Q6IPN6;Q53HR5;Q53HQ7;Q53HM9;Q53GE9;Q53G85;P68104;A8K9C4;Q5VTE0;Q96RE1;A0A087WVQ9;Q53GA1;P68104-2;B4DNE0;B4DV42;Q8IUB0;Q53HR1;Q9NZS6;A0A087WV01;Q9H2I7;Q53G89;Q96CD8;Q6P4C9;Q504Z0;Q96C29;Q8TBL1;Q6P082;B4E2C5;Q16577;Q96EB3;Q2F837	Q6IPT9	EEF1A1;EEF1A1P5;EEF1A1L14;PTI-1	Elongation factor 1-alpha;Elongation factor 1-alpha 1;Putative elongation factor 1-alpha-like 3
1	1	28	2994.39	1.3952e-17	174.25	674480000	19	SGDAAIVDMVPGKPMCVESFSDYPPLGR	Q6IPT9;Q6IPS9;Q6IPN6;Q53HR5;Q53HQ7;Q53HM9;Q53GE9;Q53G85;P68104;A8K9C4;Q5VTE0;Q96RE1;A0A087WVQ9;Q53GA1;P68104-2;B4DNE0;B4DV42;Q8IUB0;Q53HR1;Q9NZS6;Q53G89;Q96CD8;Q6P4C9;Q504Z0;Q96C29;Q8TBL1;Q6P082;B4E2C5;Q96EB3;Q2F837	Q6IPT9	EEF1A1;EEF1A1P5;EEF1A1L14	Elongation factor 1-alpha;Elongation factor 1-alpha 1;Putative elongation factor 1-alpha-like 3
0	1	10	1119.59	0.00098272	120.27	606800000	7	STTTGHLIYK	Q6IPT9;Q6IPS9;Q6IPN6;Q53HR5;Q53HQ7;Q53HM9;Q53GE9;Q53G85;P68104;Q5VTE0;A0A087WVQ9;Q53GA1;P68104-2;B4DNE0;A0A087WV01;Q9H2I7;Q05639;Q5JR01;A6PW80;Q6NSH7;Q6NS35	Q6IPT9	EEF1A1;EEF1A1P5;EEF1A2	Elongation factor 1-alpha;Elongation factor 1-alpha 1;Putative elongation factor 1-alpha-like 3;Elongation factor 1-alpha 2
0	1	15	1587.87	1.1052e-25	233.84	380840000	25	THINIVVIGHVDSGK	Q6IPT9;Q6IPS9;Q6IPN6;Q53HR5;Q53HQ7;Q53HM9;Q53GE9;Q53G85;P68104;A8K9C4;Q5VTE0;A0A087WVQ9;Q53GA1;P68104-2;B4DNE0;A0A087WV01;Q9H2I7;Q05639;Q5JR01;A6PW80;Q6NSH7;Q6NS35	Q6IPT9	EEF1A1;EEF1A1P5;EEF1A2	Elongation factor 1-alpha;Elongation factor 1-alpha 1;Putative elongation factor 1-alpha-like 3;Elongation factor 1-alpha 2
0	2	24	2514.38	1.7619e-09	148.58	2797900000	28	VETGVLKPGMVVTFAPVNVTTEVK	Q6IPT9;Q6IPS9;Q6IPN6;Q53HR5;Q53HQ7;Q53HM9;Q53GE9;Q53G85;P68104;A8K9C4;Q5VTE0;Q96RE1;A0A087WVQ9;P68104-2;B4DNE0;B4DV42;Q8IUB0;Q9NZS6;Q53G89;Q96CD8;Q6P4C9;Q504Z0;Q96C29;Q8TBL1;Q6P082;B4E2C5;Q14222	Q6IPT9	EEF1A1;EEF1A1P5;EEF1A1L14;EEF1A	Elongation factor 1-alpha;Elongation factor 1-alpha 1;Putative elongation factor 1-alpha-like 3
1	0	12	1403.72	5.767e-24	227.36	1989900000	18	YYVTIIDAPGHR	Q6IPT9;Q6IPS9;Q6IPN6;Q53HR5;Q53HQ7;Q53HM9;Q53GE9;Q53G85;P68104;A8K9C4;Q5VTE0;Q96RE1;A0A087WVQ9;Q53GA1;P68104-2;B4DNE0;B4DV42;Q9NZS6;A0A087WV01;Q9H2I7;Q16577;A9X7H1;Q5JR01;A6PW80	Q6IPT9	EEF1A1;EEF1A1P5;EEF1A1L14;PTI-1	Elongation factor 1-alpha;Elongation factor 1-alpha 1;Putative elongation factor 1-alpha-like 3
1	0	8	944.486	0.0045584	113.41	190050000	5	AACNLLQR	Q01813;Q01813-2;Q5VSR5;V9GYV7	Q01813	PFKP	ATP-dependent 6-phosphofructokinase, platelet type
1	0	19	1786.9	1.1779e-72	324.79	120910000	5	AIGVLTSGGDAQGMNAAVR	Q01813;P17858	Q01813	PFKP;PFKL	ATP-dependent 6-phosphofructokinase, platelet type;ATP-dependent 6-phosphofructokinase, liver type
0	1	8	948.474	0.0014044	130.75	231540000	7	AMEWITAK	Q01813;Q01813-2;Q8WTZ9;B1APP8;Q49A78;H0Y757	Q01813	PFKP	ATP-dependent 6-phosphofructokinase, platelet type
0	0	19	2102.95	2.6321e-11	171.33	83647000	6	ASYDVSDSGQLEHVQPWSV	Q01813;Q01813-2;Q8WTZ9;O14943;B1APP8;Q49A78	Q01813	PFKP;PFK-P	ATP-dependent 6-phosphofructokinase, platelet type
0	1	12	1411.69	1.6694e-30	248.67	307650000	6	DLQSNVEHLTEK	Q01813;Q01813-2;Q8WTZ9;O14943;B1APP8	Q01813	PFKP;PFK-P	ATP-dependent 6-phosphofructokinase, platelet type
0	1	21	2118.04	1.5388e-63	300.35	174430000	8	EIGWTDVGGWTGQGGSILGTK	Q01813;Q01813-2;Q8WTZ9;O14943;H0Y3Y3	Q01813	PFKP;PFK-P	ATP-dependent 6-phosphofructokinase, platelet type
1	0	12	1392.72	9.6013e-57	309.35	174250000	4	ELVVTQLGYDTR	Q01813;Q01813-2;B1APP6;V9GY25	Q01813	PFKP	ATP-dependent 6-phosphofructokinase, platelet type
1	0	11	1301.66	2.1798e-12	192.5	156270000	7	EWSGLLEELAR	Q01813;Q01813-2;Q5VSR5;V9GYV7	Q01813	PFKP	ATP-dependent 6-phosphofructokinase, platelet type
0	1	10	1057.56	4.4079e-06	159.34	659580000	11	FLEHLSGAGK	Q01813	Q01813	PFKP	ATP-dependent 6-phosphofructokinase, platelet type
0	1	14	1554.76	5.0331e-08	162.94	121070000	5	FTTDDSICVLGISK	Q01813;Q01813-2;Q8WTZ9;O14943;B1APP8;Q49A78;H0Y757	Q01813	PFKP;PFK-P	ATP-dependent 6-phosphofructokinase, platelet type
1	0	21	2134.08	2.2537e-86	329.52	142360000	8	GITNLCVIGGDGSLTGANLFR	Q01813;Q01813-2;Q5VSR5;V9GYV7	Q01813	PFKP	ATP-dependent 6-phosphofructokinase, platelet type
1	0	41	4467.01	0.032791	15.208	1445200	2	HEEFCVPMVMVPATVSNNVPGSDFSIGADTALNTITDTCDR	Q01813;Q01813-2;Q8WTZ9;O14943	Q01813	PFKP;PFK-P	ATP-dependent 6-phosphofructokinase, platelet type
1	0	17	1910.99	4.0429e-20	216.77	136010000	5	IIEVVDAIMTTAQSHQR	Q01813;Q01813-2;Q5VSR5	Q01813	PFKP	ATP-dependent 6-phosphofructokinase, platelet type
1	1	12	1429.76	1.9219e-23	222.81	77311000	6	KEWSGLLEELAR	Q01813;Q01813-2;Q5VSR5;V9GYV7	Q01813	PFKP	ATP-dependent 6-phosphofructokinase, platelet type
0	2	11	1185.65	2.9903e-06	155.88	101260000	5	KFLEHLSGAGK	Q01813	Q01813	PFKP	ATP-dependent 6-phosphofructokinase, platelet type
0	2	15	1682.85	0.0077409	85.176	3535600	2	KFTTDDSICVLGISK	Q01813;Q01813-2;Q8WTZ9;O14943;B1APP8;Q49A78;H0Y757	Q01813	PFKP;PFK-P	ATP-dependent 6-phosphofructokinase, platelet type
0	2	12	1349.79	0.011413	85.522	2010800	1	LAIKLPDDQIPK	Q01813;Q01813-2;Q8WTZ9;O14943;B1APP6	Q01813	PFKP;PFK-P	ATP-dependent 6-phosphofructokinase, platelet type
0	2	22	2366.31	1.8319e-35	242.36	105820000	7	LNIIIVAEGAIDTQNKPITSEK	Q01813;Q01813-2;B1APP6;V9GY25	Q01813	PFKP	ATP-dependent 6-phosphofructokinase, platelet type
0	1	8	924.492	0.0040766	114.89	303150000	5	LPDDQIPK	Q01813;Q01813-2;Q8WTZ9;O14943;B1APP6	Q01813	PFKP;PFK-P	ATP-dependent 6-phosphofructokinase, platelet type
0	1	15	1818.87	3.2686e-93	346.06	123800000	7	LPLMECVQMTQDVQK	Q01813;Q01813-2;Q8WTZ9;B1APP6	Q01813	PFKP	ATP-dependent 6-phosphofructokinase, platelet type
1	0	30	3103.58	0.0081582	52.366	24292000	2	MGVEAVIALLEATPDTPACVVSLNGNHAVR	Q01813;Q01813-2;B1APP6	Q01813	PFKP	ATP-dependent 6-phosphofructokinase, platelet type
0	1	13	1446.69	4.1394e-15	193.15	266060000	10	MLAIYDGFDGFAK	Q01813;Q01813-2;Q8WTZ9;O14943;B1APP6;H0Y3Y3	Q01813	PFKP;PFK-P	ATP-dependent 6-phosphofructokinase, platelet type
0	1	22	2676.12	7.9668e-45	268.43	35626000	7	NESCSENYTTDFIYQLYSEEGK	Q01813;Q01813-2;Q8WTZ9;O14943;B1APP8;Q49A78	Q01813	PFKP;PFK-P	ATP-dependent 6-phosphofructokinase, platelet type
0	1	11	1256.71	4.529e-09	174.77	381700000	7	NVIFQPVAELK	Q01813;Q01813-2;Q8WTZ9;O14943;B1APP8;Q49A78;H0Y757	Q01813	PFKP;PFK-P	ATP-dependent 6-phosphofructokinase, platelet type
0	2	12	1384.81	5.1052e-14	199.12	145160000	3	NVIFQPVAELKK	Q01813;Q01813-2;Q8WTZ9;O14943;B1APP8;Q49A78;H0Y757	Q01813	PFKP;PFK-P	ATP-dependent 6-phosphofructokinase, platelet type
1	0	17	1809.86	1.1046e-32	244.18	269870000	8	NVLGHMQQGGAPSPFDR	Q01813;Q01813-2;Q8WTZ9;O14943;B1APP8;Q49A78;H0Y757	Q01813	PFKP;PFK-P	ATP-dependent 6-phosphofructokinase, platelet type
1	1	12	1412.81	0.013192	94.538	3576700	1	RNVIFQPVAELK	Q01813;Q01813-2;Q8WTZ9;O14943;B1APP8;Q49A78;H0Y757	Q01813	PFKP;PFK-P	ATP-dependent 6-phosphofructokinase, platelet type
0	1	10	1113.55	3.0096e-13	180.66	479860000	5	SFAGNLNTYK	Q01813;Q01813-2;Q8WTZ9;O14943;B1APP6	Q01813	PFKP;PFK-P	ATP-dependent 6-phosphofructokinase, platelet type
1	0	9	1050.55	0.00010029	147.4	95126000	6	TFVLEVMGR	Q01813;Q01813-2;Q5VSR5;A0A024R0Y5;P08237;P08237-3;B4E162;A0A0S2Z4A1;Q96I60;A0A0S2Z4I1;P08237-2;P17858;P17858-2	Q01813	PFKP;PFKM;PFKL	ATP-dependent 6-phosphofructokinase, platelet type;ATP-dependent 6-phosphofructokinase;ATP-dependent 6-phosphofructokinase, muscle type;ATP-dependent 6-phosphofructokinase, liver type
1	0	22	2169.08	4.6577e-37	254.54	120950000	7	TNCNVAVINVGAPAAGMNAAVR	Q01813;Q01813-2;Q8WTZ9;B1APP6	Q01813	PFKP	ATP-dependent 6-phosphofructokinase, platelet type
1	0	9	1021.6	5.9307e-08	181.55	651680000	12	VTILGHVQR	Q01813;Q01813-2;B1APP6;V9GY25	Q01813	PFKP	ATP-dependent 6-phosphofructokinase, platelet type
1	0	32	3491.58	8.0069e-15	158.91	16519000	1	YAYLNVVGMVGSIDNDFCGTDMTIGTDSALHR	Q01813;Q01813-2;Q5VSR5	Q01813	PFKP	ATP-dependent 6-phosphofructokinase, platelet type
1	0	10	1252.61	3.2673e-20	224.75	182150000	3	YLEEIATQMR	Q01813;Q01813-2;Q8WTZ9;O14943;H0Y3Y3	Q01813	PFKP;PFK-P	ATP-dependent 6-phosphofructokinase, platelet type
1	0	10	975.441	2.8484e-05	148.56	3788900000	13	AGFAGDDAPR	B7Z6P1;P68133;P68032;D2JYH4;A8K3K1;P63267;P62736;B3KW67;Q7Z7J6;A6NL76;Q13707;P63267-2;C9JUM1;F8WB63;B8ZZJ2;C9JFL5;F6UVQ4;F6QUT6;B7Z6I1;F8WCH0;Q53GK6;Q53G99;Q53G76;Q1KLZ0;P60709;B4E335;Q8WVW5;B4DW52;B3KUD3;G5E9R0;E7EVS6;C9JZR7;C9JTX5;L0R5C4;P63261;B4E3A4;B4DVQ0;I3L3I0;I3L1U9;I3L4N8;K7EM38;I3L3R2;J3KT65;A1E282;Q6S8J3;A5A3E0;P0CG38;P0CG39	P63261	ACTA1;ACTC1;ACTA2;ACTG2;ACTB;PS1TP5BP1;POTEM;ACTG1;POTEE;POTEF;POTEI;POTEJ	Actin, alpha skeletal muscle;Actin, alpha cardiac muscle 1;Actin, gamma-enteric smooth muscle;Actin, aortic smooth muscle;Actin, cytoplasmic 1;Actin, cytoplasmic 1, N-terminally processed;Actin, cytoplasmic 2;Actin, cytoplasmic 2, N-terminally processed;POTE ankyrin domain family member E;POTE ankyrin domain family member F;POTE ankyrin domain family member I;POTE ankyrin domain family member J
1	0	9	944.544	3.4844e-10	186.16	4199000000	12	AVFPSIVGR	B7Z6P1;P68133;P68032;D2JYH4;A8K3K1;P63267;P62736;B3KW67;Q7Z7J6;A6NL76;Q13707;P63267-2;C9JUM1;F8WB63;B8ZZJ2;C9JFL5;F6UVQ4;F6QUT6;B7Z6I1;F8WCH0;Q53GK6;Q53G99;Q53G76;Q1KLZ0;P60709;B4E335;Q8WVW5;B4DW52;B3KUD3;G5E9R0;E7EVS6;C9JZR7;C9JTX5;P63261;B4E3A4;B4DVQ0;I3L3I0;I3L1U9;I3L4N8;K7EM38;I3L3R2;J3KT65;A1E282;Q6S8J3;A5A3E0;P0CG38	P63261	ACTA1;ACTC1;ACTA2;ACTG2;ACTB;PS1TP5BP1;ACTG1;POTEE;POTEF;POTEI	Actin, alpha skeletal muscle;Actin, alpha cardiac muscle 1;Actin, gamma-enteric smooth muscle;Actin, aortic smooth muscle;Actin, cytoplasmic 1;Actin, cytoplasmic 1, N-terminally processed;Actin, cytoplasmic 2;Actin, cytoplasmic 2, N-terminally processed;POTE ankyrin domain family member E;POTE ankyrin domain family member F;POTE ankyrin domain family member I
2	0	11	1197.7	1.2326e-05	150.15	148090000	2	AVFPSIVGRPR	B7Z6P1;P68133;P68032;D2JYH4;A8K3K1;P63267;P62736;B3KW67;Q7Z7J6;A6NL76;Q13707;P63267-2;C9JUM1;F8WB63;B8ZZJ2;C9JFL5;F6UVQ4;F6QUT6;B7Z6I1;F8WCH0;Q53GK6;Q53G99;Q53G76;Q1KLZ0;P60709;B4E335;Q8WVW5;B4DW52;B3KUD3;G5E9R0;E7EVS6;C9JZR7;C9JTX5;P63261;B4E3A4;B4DVQ0;I3L3I0;I3L1U9;I3L4N8;K7EM38;I3L3R2;J3KT65;A1E282;Q6S8J3;A5A3E0;P0CG38	P63261	ACTA1;ACTC1;ACTA2;ACTG2;ACTB;PS1TP5BP1;ACTG1;POTEE;POTEF;POTEI	Actin, alpha skeletal muscle;Actin, alpha cardiac muscle 1;Actin, gamma-enteric smooth muscle;Actin, aortic smooth muscle;Actin, cytoplasmic 1;Actin, cytoplasmic 1, N-terminally processed;Actin, cytoplasmic 2;Actin, cytoplasmic 2, N-terminally processed;POTE ankyrin domain family member E;POTE ankyrin domain family member F;POTE ankyrin domain family member I
0	1	28	3230.45	1.0633e-13	161.58	1393600000	29	CPEALFQPSFLGMESCGIHETTFNSIMK	Q53GK6;Q53G99;Q53G76;Q1KLZ0;P60709;B4E335;Q8WVW5;B4DW52;B3KWQ3;Q6PJ43;B7ZAP6;V9HVZ7;Q96FU6;A4UCT3;A5GZ75;Q96DE1;F1BXA6;P63261;B4E3A4;B4DVQ0	P63261	PS1TP5BP1;ACTB;ACTG1;HEL-176	Actin, cytoplasmic 1;Actin, cytoplasmic 1, N-terminally processed;Actin, cytoplasmic 2;Actin, cytoplasmic 2, N-terminally processed
0	1	8	997.479	5.4392e-07	182.39	2209500000	18	DLTDYLMK	B7Z6P1;P68133;P68032;D2JYH4;A8K3K1;P63267;P62736;B3KW67;Q13707;B4DUI8;P63267-2;K4EQ44;K4EP00;K4ENJ5;Q53GK6;Q53G99;Q53G76;Q1KLZ0;P60709;B4E335;Q8WVW5;B4DW52;B3KWQ3;Q6PJ43;B7ZAP6;V9HVZ7;B3KUD3;A0AUL6;P63261;B4E3A4;I3L3I0;I3L1U9;I3L4N8;Q562R1	P63261	ACTA1;ACTC1;ACTA2;ACTG2;PS1TP5BP1;ACTB;ACTG1;HEL-176;ACTBL2	Actin, alpha skeletal muscle;Actin, alpha cardiac muscle 1;Actin, gamma-enteric smooth muscle;Actin, aortic smooth muscle;Actin, cytoplasmic 1;Actin, cytoplasmic 1, N-terminally processed;Actin, cytoplasmic 2;Actin, cytoplasmic 2, N-terminally processed;Beta-actin-like protein 2
1	0	21	2214.06	4.2298e-99	346.62	1381800000	26	DLYANTVLSGGTTMYPGIADR	Q53GK6;Q53G99;Q53G76;Q1KLZ0;P60709;B4E335;Q8WVW5;B4DW52;B3KWQ3;Q6PJ43;B7ZAP6;V9HVZ7;Q96FU6;A4UCT3;A5GZ75;Q96DE1;F1BXA6;P63261;B4E3A4;B4DVQ0;Q9UE89	P63261	PS1TP5BP1;ACTB;ACTG1;HEL-176	Actin, cytoplasmic 1;Actin, cytoplasmic 1, N-terminally processed;Actin, cytoplasmic 2;Actin, cytoplasmic 2, N-terminally processed
0	1	11	1197.52	1.9744e-22	236.22	1160700000	10	DSYVGDEAQSK	B7Z6P1;P68133;P68032;D2JYH4;A8K3K1;P63267;P62736;B3KW67;Q7Z7J6;A6NL76;B4DUI8;C9JUM1;F8WB63;B8ZZJ2;C9JFL5;F6UVQ4;F6QUT6;B7Z6I1;Q53GK6;Q53G99;Q53G76;Q1KLZ0;P60709;B4E335;Q8WVW5;B3KUD3;G5E9R0;E7EVS6;C9JZR7;C9JTX5;P63261;B4E3A4;B4DVQ0;I3L3I0;I3L1U9;K7EM38;I3L3R2;J3KT65;A1E282	P63261	ACTA1;ACTC1;ACTA2;ACTG2;ACTB;PS1TP5BP1;ACTG1	Actin, alpha skeletal muscle;Actin, alpha cardiac muscle 1;Actin, gamma-enteric smooth muscle;Actin, aortic smooth muscle;Actin, cytoplasmic 1;Actin, cytoplasmic 1, N-terminally processed;Actin, cytoplasmic 2;Actin, cytoplasmic 2, N-terminally processed
1	1	12	1353.62	8.8342e-14	196.02	7284600	2	DSYVGDEAQSKR	B7Z6P1;P68133;P68032;D2JYH4;A8K3K1;P63267;P62736;B3KW67;Q7Z7J6;A6NL76;B4DUI8;C9JUM1;F8WB63;B8ZZJ2;C9JFL5;F6UVQ4;F6QUT6;B7Z6I1;Q53GK6;Q53G99;Q53G76;Q1KLZ0;P60709;B4E335;Q8WVW5;B3KUD3;G5E9R0;E7EVS6;C9JZR7;C9JTX5;P63261;B4E3A4;B4DVQ0;I3L3I0;I3L1U9;K7EM38;I3L3R2;J3KT65;A1E282	P63261	ACTA1;ACTC1;ACTA2;ACTG2;ACTB;PS1TP5BP1;ACTG1	Actin, alpha skeletal muscle;Actin, alpha cardiac muscle 1;Actin, gamma-enteric smooth muscle;Actin, aortic smooth muscle;Actin, cytoplasmic 1;Actin, cytoplasmic 1, N-terminally processed;Actin, cytoplasmic 2;Actin, cytoplasmic 2, N-terminally processed
0	1	17	1834.84	1.0769e-40	268.08	208590000	8	EEEIAALVIDNGSGMCK	P63261;B4E3A4;B4DVQ0;I3L3I0;I3L1U9;I3L4N8;K7EM38;I3L3R2;J3KT65	P63261	ACTG1	Actin, cytoplasmic 2;Actin, cytoplasmic 2, N-terminally processed
0	1	11	1160.61	8.3642e-07	159.94	3010900000	20	EITALAPSTMK	B7Z6P1;P68133;P68032;D2JYH4;A8K3K1;P63267;P62736;Q7Z7J6;A6NL76;Q13707;B4DUI8;P63267-2;B3KPP5;Q53GK6;Q53G99;Q53G76;Q1KLZ0;P60709;B4E335;Q8WVW5;B4DW52;B3KWQ3;Q6PJ43;B7ZAP6;B3KUD3;Q96FU6;A4UCT3;A5GZ75;Q96DE1;F1BXA6;P63261;B4E3A4;B4DVQ0;Q9UE89	P63261	ACTA1;ACTC1;ACTA2;ACTG2;PS1TP5BP1;ACTB;ACTG1	Actin, alpha skeletal muscle;Actin, alpha cardiac muscle 1;Actin, gamma-enteric smooth muscle;Actin, aortic smooth muscle;Actin, cytoplasmic 1;Actin, cytoplasmic 1, N-terminally processed;Actin, cytoplasmic 2;Actin, cytoplasmic 2, N-terminally processed
1	1	30	3533.62	0.0032081	58.319	4545800	2	FRCPEALFQPSFLGMESCGIHETTFNSIMK	Q53GK6;Q53G99;Q53G76;Q1KLZ0;P60709;B4E335;Q8WVW5;B4DW52;B3KWQ3;Q6PJ43;B7ZAP6;V9HVZ7;Q96FU6;A4UCT3;A5GZ75;Q96DE1;F1BXA6;P63261;B4E3A4;B4DVQ0	P63261	PS1TP5BP1;ACTB;ACTG1;HEL-176	Actin, cytoplasmic 1;Actin, cytoplasmic 1, N-terminally processed;Actin, cytoplasmic 2;Actin, cytoplasmic 2, N-terminally processed
1	0	10	1131.52	3.3916e-19	210.08	1480200000	9	GYSFTTTAER	Q53GK6;Q53G99;Q53G76;Q1KLZ0;P60709;B4E335;Q8WVW5;B4DW52;B3KWQ3;Q6PJ43;B7ZAP6;V9HVZ7;P63261;B4E3A4;B4DVQ0;I3L3I0;I3L1U9;I3L4N8	P63261	PS1TP5BP1;ACTB;ACTG1;HEL-176	Actin, cytoplasmic 1;Actin, cytoplasmic 1, N-terminally processed;Actin, cytoplasmic 2;Actin, cytoplasmic 2, N-terminally processed
0	1	11	1170.56	2.0028e-05	145.99	1050300000	80	HQGVMVGMGQK	B7Z6P1;P68133;P68032;D2JYH4;A8K3K1;P63267;P62736;B3KW67;Q7Z7J6;A6NL76;Q13707;C9JUM1;F8WB63;B8ZZJ2;C9JFL5;F6UVQ4;F6QUT6;B7Z6I1;Q53GK6;Q53G99;Q53G76;Q1KLZ0;P60709;B4E335;Q8WVW5;B3KUD3;G5E9R0;E7EVS6;C9JZR7;C9JTX5;P63261;B4E3A4;B4DVQ0;I3L3I0;I3L1U9;K7EM38;I3L3R2;J3KT65;A1E282;Q562R1	P63261	ACTA1;ACTC1;ACTA2;ACTG2;ACTB;PS1TP5BP1;ACTG1;ACTBL2	Actin, alpha skeletal muscle;Actin, alpha cardiac muscle 1;Actin, gamma-enteric smooth muscle;Actin, aortic smooth muscle;Actin, cytoplasmic 1;Actin, cytoplasmic 1, N-terminally processed;Actin, cytoplasmic 2;Actin, cytoplasmic 2, N-terminally processed;Beta-actin-like protein 2
1	1	8	922.56	0.026334	71.877	3509400	1	IIAPPERK	B7Z6P1;P68133;P68032;D2JYH4;P63267;P62736;B3KW67;Q7Z7J6;A6NL76;B4DUI8;P63267-2;B3KPP5;Q53GK6;Q53G99;Q53G76;Q1KLZ0;P60709;B4E335;Q8WVW5;B4DW52;B3KWQ3;Q6PJ43;B7ZAP6;V9HVZ7;B3KUD3;Q96FU6;A4UCT3;A5GZ75;Q96DE1;F1BXA6;P63261;B4E3A4;B4DVQ0;Q562R1	P63261	ACTA1;ACTC1;ACTA2;ACTG2;PS1TP5BP1;ACTB;ACTG1;HEL-176;ACTBL2	Actin, alpha skeletal muscle;Actin, alpha cardiac muscle 1;Actin, gamma-enteric smooth muscle;Actin, aortic smooth muscle;Actin, cytoplasmic 1;Actin, cytoplasmic 1, N-terminally processed;Actin, cytoplasmic 2;Actin, cytoplasmic 2, N-terminally processed;Beta-actin-like protein 2
1	0	11	1514.74	9.068e-28	240.37	4453100000	36	IWHHTFYNELR	B7Z6P1;P68133;P68032;A8K3K1;Q7Z7J6;A6NL76;C9JUM1;Q562Y4;Q562X7;Q562X6;Q562X4;Q562X2;Q562X1;Q562X0;Q562W2;Q562U1;Q562U0;Q562T8;Q562T6;Q562T5;Q562T4;Q562T3;Q562T0;Q562R6;Q562R5;Q562R0;Q562Q9;Q562Q8;Q562Q6;Q562Q4;Q562Q2;Q562Q0;Q562P8;Q562L3;Q53GK6;Q53G99;Q53G76;Q1KLZ0;P60709;B4E335;Q8WVW5;B4DW52;G5E9R0;E7EVS6;C9JZR7;Q562Z7;Q562Y6;Q562X9;Q562S0;Q562N8;Q562N0;Q562L5;L0R5C4;Q9BYX7;Q562Y8;Q562N2;Q562M5;…	P63261	ACTA1;ACTC1;ACTB;ACT;PS1TP5BP1;POTEM;POTEKP;ACTG1;POTEE;POTEF;POTEI;POTEJ	Actin, alpha skeletal muscle;Actin, alpha cardiac muscle 1;Actin, cytoplasmic 1;Actin, cytoplasmic 1, N-terminally processed;Putative beta-actin-like protein 3;Putative beta-actin-like protein 3, N-terminally processed;Actin, cytoplasmic 2;Actin, cytoplasmic 2, N-terminally processed;POTE ankyrin domain family member E;POTE ankyrin domain family member F;POTE ankyrin domain family member I;POTE a…
1	1	22	2342.16	2.5653e-64	308.38	664780000	12	KDLYANTVLSGGTTMYPGIADR	Q53GK6;Q53G99;Q53G76;Q1KLZ0;P60709;B4E335;Q8WVW5;B4DW52;B3KWQ3;Q6PJ43;B7ZAP6;V9HVZ7;Q96FU6;A4UCT3;A5GZ75;Q96DE1;F1BXA6;P63261;B4E3A4;B4DVQ0;Q9UE89	P63261	PS1TP5BP1;ACTB;ACTG1;HEL-176	Actin, cytoplasmic 1;Actin, cytoplasmic 1, N-terminally processed;Actin, cytoplasmic 2;Actin, cytoplasmic 2, N-terminally processed
0	1	23	2549.17	2.697e-64	292.78	706630000	116	LCYVALDFEQEMATAASSSSLEK	Q53GK6;Q53G99;Q53G76;Q1KLZ0;P60709;B4E335;Q8WVW5;B4DW52;B3KWQ3;Q6PJ43;B7ZAP6;V9HVZ7;Q96FU6;A4UCT3;A5GZ75;G8FSY7;P63261;B4E3A4;B4DVQ0;I3L4N8;Q6S8J3	P63261	PS1TP5BP1;ACTB;ACTG1;HEL-176;POTEE	Actin, cytoplasmic 1;Actin, cytoplasmic 1, N-terminally processed;Actin, cytoplasmic 2;Actin, cytoplasmic 2, N-terminally processed;POTE ankyrin domain family member E
1	1	14	1622.83	0.046087	62.298	1758900	1	LDLAGRDLTDYLMK	B7Z6P1;P68133;P68032;D2JYH4;A8K3K1;P63267;P62736;B3KW67;Q13707;B4DUI8;P63267-2;K4EQ44;K4EP00;K4ENJ5;Q53GK6;Q53G99;Q53G76;Q1KLZ0;P60709;B4E335;Q8WVW5;B4DW52;B3KWQ3;Q6PJ43;B7ZAP6;V9HVZ7;B3KUD3;A0AUL6;P63261;B4E3A4;I3L3I0;I3L1U9;I3L4N8;Q562R1	P63261	ACTA1;ACTC1;ACTA2;ACTG2;PS1TP5BP1;ACTB;ACTG1;HEL-176;ACTBL2	Actin, alpha skeletal muscle;Actin, alpha cardiac muscle 1;Actin, gamma-enteric smooth muscle;Actin, aortic smooth muscle;Actin, cytoplasmic 1;Actin, cytoplasmic 1, N-terminally processed;Actin, cytoplasmic 2;Actin, cytoplasmic 2, N-terminally processed;Beta-actin-like protein 2
1	0	13	1515.7	1.0619e-25	231.74	4308400000	18	QEYDESGPSIVHR	Q53GK6;Q53G99;Q53G76;Q1KLZ0;P60709;B4E335;Q8WVW5;B4DW52;B3KWQ3;Q6PJ43;B7ZAP6;V9HVZ7;Q96FU6;Q96DE1;L0R5C4;Q9BYX7;P63261;B4E3A4;B4DVQ0;Q6S8J3;A5A3E0;P0CG38;P0CG39	P63261	PS1TP5BP1;ACTB;ACTG1;HEL-176;POTEM;POTEKP;POTEE;POTEF;POTEI;POTEJ	Actin, cytoplasmic 1;Actin, cytoplasmic 1, N-terminally processed;Putative beta-actin-like protein 3;Putative beta-actin-like protein 3, N-terminally processed;Actin, cytoplasmic 2;Actin, cytoplasmic 2, N-terminally processed;POTE ankyrin domain family member E;POTE ankyrin domain family member F;POTE ankyrin domain family member I;POTE ankyrin domain family member J
1	0	16	1789.88	8.0904e-59	298.1	2633700000	23	SYELPDGQVITIGNER	B7Z6P1;P68133;P68032;D2JYH4;A8K3K1;P63267;P62736;B3KW67;Q13707;B4DUI8;P63267-2;K4EQ44;K4EP00;K4ENJ5;B3KPP5;Q53GK6;Q53G99;Q53G76;Q1KLZ0;P60709;B4E335;Q8WVW5;B4DW52;B3KWQ3;Q6PJ43;B7ZAP6;V9HVZ7;B3KUD3;Q96FU6;A4UCT3;A5GZ75;Q96DE1;F1BXA6;Q9BYX7;G8FSY7;P63261;B4E3A4;B4DVQ0;Q562R1;Q6S8J3;A5A3E0	P63261	ACTA1;ACTC1;ACTA2;ACTG2;PS1TP5BP1;ACTB;ACTG1;HEL-176;POTEKP;ACTBL2;POTEE;POTEF	Actin, alpha skeletal muscle;Actin, alpha cardiac muscle 1;Actin, gamma-enteric smooth muscle;Actin, aortic smooth muscle;Actin, cytoplasmic 1;Actin, cytoplasmic 1, N-terminally processed;Putative beta-actin-like protein 3;Putative beta-actin-like protein 3, N-terminally processed;Actin, cytoplasmic 2;Actin, cytoplasmic 2, N-terminally processed;Beta-actin-like protein 2;POTE ankyrin domain famil…
1	0	30	3182.61	7.2135e-19	172.77	2727300000	25	TTGIVMDSGDGVTHTVPIYEGYALPHAILR	Q53GK6;Q53G99;Q53G76;Q1KLZ0;P60709;Q8WVW5;B4DW52;B3KWQ3;Q6PJ43;B7ZAP6;A0AUL6;Q562Z7;Q562Y6;Q562X9;Q562S0;Q562N8;Q562N0;Q562L5;Q562R8;Q562P0;Q562L9;Q562Y8;Q562N2;Q562M5;Q562M3;Q562Z6;P63261;I3L3I0;I3L1U9;I3L4N8	P63261	PS1TP5BP1;ACTB;ACTG1;ACT	Actin, cytoplasmic 1;Actin, cytoplasmic 1, N-terminally processed;Actin, cytoplasmic 2;Actin, cytoplasmic 2, N-terminally processed
0	1	18	1953.06	4.0613e-15	193.3	7591100000	22	VAPEEHPVLLTEAPLNPK	Q53GK6;Q53G99;Q53G76;Q1KLZ0;P60709;B4E335;Q8WVW5;B4DW52;G5E9R0;E7EVS6;Q562Z7;Q562Y6;Q562X9;Q562S0;Q562N8;Q562N0;Q562L5;Q562R8;Q562P0;Q562L9;Q562U2;Q562P9;Q562N6;Q562N4;Q562L6;Q562V5;P63261;B4E3A4;B4DVQ0;I3L3I0;I3L1U9;I3L4N8;K7EM38;I3L3R2;J3KT65;A1E282	P63261	PS1TP5BP1;ACTB;ACT;ACTG1	Actin, cytoplasmic 1;Actin, cytoplasmic 1, N-terminally processed;Actin, cytoplasmic 2;Actin, cytoplasmic 2, N-terminally processed
1	0	10	1144.57	0.043562	63.32	211390	1	ADLISEDVQR	A0A024R0R1;M0QZR4;Q92888-2;Q92888;Q92888-3;Q92888-4;Q8NF33	A0A024R0R1	ARHGEF1;FLJ00369	Rho guanine nucleotide exchange factor 1
1	1	13	1357.65	1.0222e-07	163.62	1178900	1	AEVDAEKPGATDR	A0A024R0R1;M0QZR4;Q92888-2;Q92888;Q92888-3;Q92888-4;Q8NF33	A0A024R0R1	ARHGEF1;FLJ00369	Rho guanine nucleotide exchange factor 1
1	0	11	1314.72	0.0014342	101.66	41687000	4	EILHHVNQAVR	A0A024R0R1;M0QZR4;Q92888-2;Q92888;Q92888-3;Q92888-4;M0QYC1;Q49AN3;M0R2C7	A0A024R0R1	ARHGEF1	Rho guanine nucleotide exchange factor 1
2	0	13	1595.75	0.023135	74.962	20916000	1	FCAFVQEAESRPR	A0A024R0R1;M0QZR4;Q92888-2;Q92888;Q92888-3;Q92888-4;M0QYC1;Q49AN3;M0QYS3	A0A024R0R1	ARHGEF1	Rho guanine nucleotide exchange factor 1
0	1	11	1270.56	0.0091411	89.266	682860	1	FDGAEGSWFQK	A0A024R0R1;M0QZR4;Q92888-2;Q92888;Q92888-3;Q92888-4;M0QYC1;Q49AN3;M0QYS3	A0A024R0R1	ARHGEF1	Rho guanine nucleotide exchange factor 1
1	0	10	1001.55	0.0082742	91.701	6121000	1	GLSSILDAAR	A0A024R0R1;M0QZR4;Q92888-2;Q92888;Q92888-3;Q92888-4;Q8NF33;M0QZH8	A0A024R0R1	ARHGEF1;FLJ00369	Rho guanine nucleotide exchange factor 1
1	0	10	1206.65	0.016483	64.654	14161000	2	LVHEGPLTWR	A0A024R0R1;M0QZR4;Q92888-2;Q92888;Q92888-3;Q92888-4;M0QYC1;M0R2C7	A0A024R0R1	ARHGEF1	Rho guanine nucleotide exchange factor 1
0	1	9	1062.57	0.039096	67.113	9143400	1	QSFALEQLK	A0A024R0R1;M0QZR4;Q92888-2;Q92888;Q92888-3;Q92888-4;M0QYC1;Q49AN3;M0QYS3	A0A024R0R1	ARHGEF1	Rho guanine nucleotide exchange factor 1
2	0	8	1008.58	0.011018	89.029	17762000	3	RLDLSHLR	A0A024R0R1;M0QZR4;Q92888-2;Q92888;Q92888-3;Q92888-4;M0QYC1;M0R2C7	A0A024R0R1	ARHGEF1	Rho guanine nucleotide exchange factor 1
2	0	18	2060.09	0.018046	62.055	1713100	1	RQESGYLIEEIGDVLLAR	A0A024R0R1;M0QZR4;Q92888-2;Q92888;Q92888-3;Q92888-4;M0QYC1;Q49AN3;M0QYS3	A0A024R0R1	ARHGEF1	Rho guanine nucleotide exchange factor 1
1	0	13	1363.73	0.04717	68.463	1383800	0	SAAVVNAIGLYMR	A0A024R0R1;M0QZR4;Q92888-2;Q92888;Q92888-3;Q92888-4;Q8NF33	A0A024R0R1	ARHGEF1;FLJ00369	Rho guanine nucleotide exchange factor 1
1	0	14	1594.76	0.011446	85.271	3888700	2	SGLELEPEEPPGWR	A0A024R0R1;M0QZR4;Q92888-2;Q92888;Q92888-3;Q92888-4;M0QYC1;Q49AN3;M0QYS3;M0QZH8	A0A024R0R1	ARHGEF1	Rho guanine nucleotide exchange factor 1
1	0	7	845.479	0.0008352	143	25852000	3	ACTILLR	B3KX11;P49368;Q59H77;P49368-2;B4DUR8;Q2TU64	B3KX11	CCT3	T-complex protein 1 subunit gamma
0	1	10	1105.57	0.0038481	104.82	39408000	2	ALDDMISTLK	B3KX11;P49368;Q59H77;P49368-2;B4DUR8;Q2TU64;E9PRC8;Q5SZX6;E9PQ35;E9PM09;Q5SZX9;Q5SZW8	B3KX11	CCT3	T-complex protein 1 subunit gamma
1	0	11	1336.62	9.7839e-07	158.56	54303000	2	AMTGVEQWPYR	B3KX11;P49368;Q59H77;P49368-2;B4DUR8;Q2TU64	B3KX11	CCT3	T-complex protein 1 subunit gamma
1	0	11	1165.68	0.0018277	124.39	173490000	2	AVAQALEVIPR	B3KX11;P49368;Q59H77;P49368-2;B4DUR8;Q2TU64	B3KX11	CCT3	T-complex protein 1 subunit gamma
1	0	8	973.508	0.0091589	99.442	41029000	2	EILSEVER	B3KX11;P49368;Q59H77;P49368-2;B4DUR8;Q2TU64	B3KX11	CCT3	T-complex protein 1 subunit gamma
0	1	11	1253.7	1.7198e-09	181.53	74918000	5	ELGIWEPLAVK	B3KX11;P49368;Q59H77;P49368-2;B4DUR8;Q2TU64	B3KX11	CCT3	T-complex protein 1 subunit gamma
1	0	12	1402.7	2.2219e-18	205.12	120400000	5	GISDLAQHYLMR	B3KX11;P49368;Q59H77;P49368-2;B4DUR8;Q2TU64	B3KX11	CCT3	T-complex protein 1 subunit gamma
0	1	22	2505.09	0.00025257	90.882	7321900	1	HTQENCETWGVNGETGTLVDMK	B3KX11;P49368;Q59H77;P49368-2;B4DUR8;Q2TU64	B3KX11	CCT3	T-complex protein 1 subunit gamma
0	2	16	1947.89	1.6968e-10	175.01	24983000	3	IGDEYFTFITDCKDPK	B3KX11;P49368;Q59H77;P49368-2;B4DUR8;Q2TU64	B3KX11	CCT3	T-complex protein 1 subunit gamma
1	0	13	1427.74	2.0877e-11	179.67	77973000	5	IPGGIIEDSCVLR	B3KX11;P49368;Q59H77;P49368-2;B4DUR8;Q2TU64;E9PRC8;Q5SZX6;E9PQ35	B3KX11	CCT3	T-complex protein 1 subunit gamma
0	1	24	2606.32	0.0099233	57.39	211160	1	ISIPVDISDSDMMLNIINSSITTK	B3KX11;P49368;Q59H77;P49368-2;B4DUR8;Q2TU64;E9PRC8;Q5SZX6;E9PQ35;E9PM09;Q5SZW8	B3KX11	CCT3	T-complex protein 1 subunit gamma
0	1	11	1278.71	6.2635e-05	135.99	114520000	5	IVLLDSSLEYK	B3KX11;P49368;Q59H77;P49368-2;B4DUR8;Q2TU64;Q5SZX6	B3KX11	CCT3	T-complex protein 1 subunit gamma
2	1	23	2495.32	3.7135e-06	121.48	111660000	4	IVSRPEELREDDVGTGAGLLEIK	B3KX11;P49368;Q59H77;P49368-2;B4DUR8	B3KX11	CCT3	T-complex protein 1 subunit gamma
1	1	12	1375.69	5.8758e-10	174.94	78550000	4	KGESQTDIEITR	B3KX11;P49368;Q59H77;P49368-2;B4DUR8;Q2TU64	B3KX11	CCT3	T-complex protein 1 subunit gamma
1	0	20	2130.06	5.8077e-12	178.1	20383000	3	MLLDPMGGIVMTNDGNAILR	B3KX11;P49368;Q59H77;B4DUR8;E9PRC8;Q5SZX6;Q5SZX9	B3KX11	CCT3	T-complex protein 1 subunit gamma
1	1	15	1709.91	5.0967e-05	133.48	49908000	2	MMGHRPVLVLSQNTK	B3KX11;P49368;P49368-2;Q2TU64;E9PRC8;E9PM09;Q5SZX9	B3KX11	CCT3	T-complex protein 1 subunit gamma
1	0	9	1108.5	7.1004e-05	148.56	14721000	1	MVQFEENGR	B3KX11;P49368;Q59H77;P49368-2;B4DUR8;Q2TU64;E9PRC8;Q5SZX6;E9PQ35;Q5SZW8	B3KX11	CCT3	T-complex protein 1 subunit gamma
1	0	10	1233.56	2.307e-18	199.33	24887000	4	NLQDAMQVCR	B3KX11;P49368;Q59H77;P49368-2;B4DUR8;Q2TU64	B3KX11	CCT3	T-complex protein 1 subunit gamma
0	1	26	2616.36	0.0014825	73.11	91286000	4	NVLLDPQLVPGGGASEMAVAHALTEK	B3KX11;P49368;Q59H77;P49368-2;B4DUR8;Q2TU64	B3KX11	CCT3	T-complex protein 1 subunit gamma
0	1	10	1097.64	0.00017478	135.8	23816000	2	PVLVLSQNTK	B3KX11;P49368;Q59H77;P49368-2;Q2TU64;E9PRC8;E9PM09;Q5SZX9	B3KX11	CCT3	T-complex protein 1 subunit gamma
1	0	11	1184.71	1.7737e-09	181.4	168520000	6	TAVETAVLLLR	B3KX11;P49368;Q59H77;P49368-2;B4DUR8;Q2TU64	B3KX11	CCT3	T-complex protein 1 subunit gamma
1	0	12	1332.68	1.6468e-18	209.25	106080000	3	TLIQNCGASTIR	B3KX11;P49368;Q59H77;P49368-2;B4DUR8;Q2TU64	B3KX11	CCT3	T-complex protein 1 subunit gamma
0	1	14	1546.78	0.00090448	123.63	40699000	1	WSSLACNIALDAVK	B3KX11;P49368;Q59H77;P49368-2;B4DUR8;Q2TU64;E9PRC8;Q5SZX6;E9PQ35;Q5SZW8	B3KX11	CCT3	T-complex protein 1 subunit gamma
2	0	12	1479.75	1.3184e-05	148.89	197980000	7	ARFEELNADLFR	V9HW22;P11142;E9PKE3;Q53GZ6;Q96IS6;B3KTV0;Q53HF2;P11142-2;E9PNE6;E9PN89;B4E1Q1;A8K7Q2;A0A024R6B5;P54652	V9HW22	HEL-S-72p;HSPA8;HSPA2	Heat shock cognate 71 kDa protein;Heat shock-related 70 kDa protein 2
0	1	10	1303.62	7.8792e-16	217.22	102300000	6	CNEIINWLDK	V9HW22;P11142;E9PKE3;Q53GZ6;Q96IS6;B3KTV0;E9PNE6;B4E1Q1;A8K7Q2;E9PS65;Q96BE0;Q96H53;E9PM13;Q9NZ87;Q9NWW3	V9HW22	HEL-S-72p;HSPA8	Heat shock cognate 71 kDa protein
1	0	12	1198.67	3.4082e-19	218.62	342160000	6	DAGTIAGLNVLR	V9HW22;P11142;E9PKE3;Q53GZ6;Q96IS6;B3KTV0;Q53HF2;P11142-2;E9PN89;B4E1Q1;B4DTX2;E9PLF4;E9PQQ4;E9PQK7;E9PK54;E9PI65;A4D111	V9HW22	HEL-S-72p;HSPA8;LOC401308	Heat shock cognate 71 kDa protein
0	1	9	992.518	0.02252	76.221	163090000	3	EIAEAYLGK	V9HW22;P11142;E9PKE3;Q53GZ6;Q96IS6;B3KTV0;Q53HF2;P11142-2;E9PN89;B4DTX2;E9PLF4;E9PQQ4;E9PQK7;E9PK54;E9PPY6;E9PI65;A4D111	V9HW22	HEL-S-72p;HSPA8;LOC401308	Heat shock cognate 71 kDa protein
0	1	11	1253.56	6.9963e-09	168.83	46007000	3	FDDAVVQSDMK	V9HW22;P11142;E9PKE3;Q53GZ6;Q96IS6;Q53HF2;P11142-2;E9PNE6;E9PN89;B4DTX2;E9PLF4;E9PQQ4;E9PQK7;E9PK54;E9PPY6;E9PN25;A4D111	V9HW22	HEL-S-72p;HSPA8;LOC401308	Heat shock cognate 71 kDa protein
1	0	10	1252.61	3.018e-11	190.57	164980000	5	FEELNADLFR	V9HW22;P11142;E9PKE3;Q53GZ6;Q96IS6;B3KTV0;Q53HF2;P11142-2;E9PNE6;E9PN89;B4E1Q1;A8K7Q2;A0A024R6B5;P54652;B3KUS2	V9HW22	HEL-S-72p;HSPA8;HSPA2	Heat shock cognate 71 kDa protein;Heat shock-related 70 kDa protein 2
0	1	22	2262.11	2.5675e-14	164.01	177290000	5	GPAVGIDLGTTYSCVGVFQHGK	V9HW22;P11142;E9PKE3;Q53GZ6;B3KTV0;Q53HF2;P11142-2;E9PNE6;B4DTX2;E9PLF4;E9PQQ4;E9PQK7;E9PK54;E9PPY6;E9PI65;E9PN25	V9HW22	HEL-S-72p;HSPA8	Heat shock cognate 71 kDa protein
0	1	8	857.449	0.0084081	101.72	91023000	2	GTLDPVEK	V9HW22;P11142;E9PKE3;Q53GZ6;Q96IS6;B3KTV0;Q53HF2;P11142-2;E9PNE6;E9PN89;B4E1Q1;A8K7Q2	V9HW22	HEL-S-72p;HSPA8	Heat shock cognate 71 kDa protein
0	1	24	2513.3	0.00021872	88.627	1394900	3	GVPQIEVTFDIDANGILNVSAVDK	V9HW22;P11142;E9PKE3;Q53GZ6;Q96IS6;B3KTV0;E9PNE6;B4E1Q1;A8K7Q2;E9PS65;Q96BE0;Q96H53;E9PM13	V9HW22	HEL-S-72p;HSPA8	Heat shock cognate 71 kDa protein
1	1	14	1652.82	1.831e-08	166.24	112230000	6	HWPFMVVNDAGRPK	V9HW22;P11142;E9PKE3;Q53GZ6;Q96IS6;Q53HF2;P11142-2;E9PNE6;E9PN89;B4DTX2;E9PLF4;E9PQQ4;E9PQK7;E9PK54;E9PPY6;E9PN25	V9HW22	HEL-S-72p;HSPA8	Heat shock cognate 71 kDa protein
0	1	16	1658.89	1.0321e-58	294.94	418960000	10	IINEPTAAAIAYGLDK	V9HWB4;P11021;B4DEF7;V9HW22;P11142;E9PKE3;Q96IS6;B3KTV0;Q53HF2;P11142-2;E9PN89;B4E1Q1;B4DTX2;E9PLF4;E9PI65;A0A024R6B5;P54652	V9HWB4	HEL-S-89n;HSPA5;HEL-S-72p;HSPA8;HSPA2	78 kDa glucose-regulated protein;Heat shock cognate 71 kDa protein;Heat shock-related 70 kDa protein 2
0	2	17	1786.98	0.013971	71.402	260040000	2	IINEPTAAAIAYGLDKK	V9HW22;P11142;E9PKE3;Q96IS6;B3KTV0;Q53HF2;P11142-2;E9PN89;B4E1Q1;B4DTX2;E9PI65;A0A024R6B5;P54652	V9HW22	HEL-S-72p;HSPA8;HSPA2	Heat shock cognate 71 kDa protein;Heat shock-related 70 kDa protein 2
0	1	9	1080.56	8.5304e-06	162.64	245450000	9	LLQDFFNGK	Q53FC7;B3KSM6;B2R6X5;P17066;B4DHP5;V9HW22;P11142;E9PKE3;Q53GZ6;Q96IS6;B3KTV0;Q53HF2;P11142-2;E9PNE6;E9PN89;B4E1Q1;A8K7Q2;A0A024R6B5;P54652;B3KUS2	V9HW22	HSPA6;HEL-S-72p;HSPA8;HSPA2	Heat shock 70 kDa protein 6;Heat shock cognate 71 kDa protein;Heat shock-related 70 kDa protein 2
0	2	13	1564.82	0.027269	101.71	0	0	LLQDFFNGKELNK	Q53FC7;B3KSM6;B2R6X5;P17066;B4DHP5;V9HW22;P11142;E9PKE3;Q53GZ6;Q96IS6;B3KTV0;Q53HF2;P11142-2;E9PNE6;E9PN89;B4E1Q1;A8K7Q2;A0A024R6B5;P54652;B3KUS2	V9HW22	HSPA6;HEL-S-72p;HSPA8;HSPA2	Heat shock 70 kDa protein 6;Heat shock cognate 71 kDa protein;Heat shock-related 70 kDa protein 2
1	1	8	988.519	0.018067	87.696	3784900	1	LSKEDIER	V9HW22;P11142;E9PKE3;Q53GZ6;Q96IS6;B3KTV0;E9PNE6;B4E1Q1;A8K7Q2;E9PS65;Q96BE0;Q96H53;E9PM13	V9HW22	HEL-S-72p;HSPA8	Heat shock cognate 71 kDa protein
0	2	11	1251.65	0.0033559	120.84	70200000	4	MKEIAEAYLGK	V9HW22;P11142;E9PKE3;Q53GZ6;Q96IS6;B3KTV0;Q53HF2;P11142-2;E9PN89;B4DTX2;E9PLF4;E9PQQ4;E9PQK7;E9PK54;E9PPY6;E9PI65;A4D111	V9HW22	HEL-S-72p;HSPA8;LOC401308	Heat shock cognate 71 kDa protein
0	1	10	1234.62	0.00095488	121.29	368330000	14	MVNHFIAEFK	V9HW22;P11142;E9PKE3;Q53GZ6;Q96IS6;B3KTV0;Q53HF2;P11142-2;E9PN89;B4E1Q1;A8K7Q2	V9HW22	HEL-S-72p;HSPA8	Heat shock cognate 71 kDa protein
0	1	15	1648.79	1.3595e-48	276.75	206460000	9	NQVAMNPTNTVFDAK	V9HW22;P11142;E9PKE3;Q53GZ6;Q53HF2;P11142-2;E9PNE6;B4DTX2;E9PLF4;E9PQQ4;E9PQK7;E9PK54;E9PPY6;E9PN25	V9HW22	HEL-S-72p;HSPA8	Heat shock cognate 71 kDa protein
0	1	11	1302.59	6.3541e-85	350.97	175310000	5	NSLESYAFNMK	V9HW22;P11142;E9PKE3;Q53GZ6;Q96IS6;B3KTV0;E9PNE6;B4E1Q1;A8K7Q2;E9PS65;Q96BE0;Q96H53;E9PM13;Q9NZ87;Q9NWW3	V9HW22	HEL-S-72p;HSPA8	Heat shock cognate 71 kDa protein
1	0	24	2773.32	4.2666e-13	166.21	41007000	6	QTQTFTTYSDNQPGVLIQVYEGER	V9HW22;P11142;E9PKE3;Q53GZ6;Q96IS6;B3KTV0;Q53HF2;P11142-2;E9PNE6;B4E1Q1;A8K7Q2;E9PS65;Q96BE0	V9HW22	HEL-S-72p;HSPA8	Heat shock cognate 71 kDa protein
1	1	12	1409.66	2.7314e-14	201.09	95110000	4	RFDDAVVQSDMK	V9HW22;P11142;E9PKE3;Q53GZ6;Q96IS6;Q53HF2;P11142-2;E9PNE6;E9PN89;B4DTX2;E9PLF4;E9PQQ4;E9PQK7;E9PK54;E9PPY6;E9PN25;A4D111	V9HW22	HEL-S-72p;HSPA8;LOC401308	Heat shock cognate 71 kDa protein
0	1	14	1615.78	2.4049e-19	203.85	173410000	7	SFYPEEVSSMVLTK	V9HW22;P11142;E9PKE3;Q53GZ6;Q96IS6;B3KTV0;Q53HF2;P11142-2;E9PN89;B4DTX2;E9PLF4;E9PQQ4;E9PQK7;E9PK54;E9PPY6;E9PI65;E9PN25	V9HW22	HEL-S-72p;HSPA8	Heat shock cognate 71 kDa protein
0	1	23	2259.14	1.1755e-75	319.95	200380000	13	SINPDEAVAYGAAVQAAILSGDK	V9HW22;P11142;E9PKE3;Q53GZ6;Q96IS6;B3KTV0;Q53HF2;P11142-2;E9PNE6;B4E1Q1;A8K7Q2	V9HW22	HEL-S-72p;HSPA8	Heat shock cognate 71 kDa protein
1	0	14	1480.8	1.0303e-19	213.69	409230000	12	SQIHDIVLVGGSTR	V9HW22;P11142;E9PKE3;Q53GZ6;Q96IS6;B3KTV0;Q53HF2;P11142-2;E9PNE6;E9PN89;B4E1Q1;A8K7Q2	V9HW22	HEL-S-72p;HSPA8	Heat shock cognate 71 kDa protein
1	0	16	1690.72	1.2195e-32	249.58	270160000	9	STAGDTHLGGEDFDNR	V9HW22;P11142;E9PKE3;Q53GZ6;Q96IS6;B3KTV0;Q53HF2;P11142-2;E9PN89;A0A024R6B5;P54652	V9HW22	HEL-S-72p;HSPA8;HSPA2	Heat shock cognate 71 kDa protein;Heat shock-related 70 kDa protein 2
1	0	13	1486.69	8.2222e-20	208.51	302480000	7	TTPSYVAFTDTER	Q53FC7;B3KSM6;B2R6X5;P17066;P48741;V9HW22;P11142;E9PKE3;Q53GZ6;B3KTV0;Q53HF2;P11142-2;E9PNE6;B4DTX2;E9PLF4;E9PQQ4;E9PQK7;E9PK54;E9PPY6;E9PI65;A0A024R6B5;P54652;E9PN25;B3KUS2;A8K5I0;A0A0G2JIW1;Q59EJ3;P0DMV9;P0DMV8;B4DWK5;B4DI39;P0DMV8-2;B4DFN9;B4E1T6;B4DNX1;B4DNV4	V9HW22	HSPA6;HSPA7;HEL-S-72p;HSPA8;HSPA2;HEL-S-103;HSPA1B;HSPA1A	Heat shock 70 kDa protein 6;Putative heat shock 70 kDa protein 7;Heat shock cognate 71 kDa protein;Heat shock-related 70 kDa protein 2;Heat shock 70 kDa protein 1B;Heat shock 70 kDa protein 1A
1	0	18	1980.99	4.2245e-33	242.59	227640000	11	TVTNAVVTVPAYFNDSQR	V9HW22;P11142;Q53GZ6;Q96IS6;B3KTV0;Q53HF2;P11142-2;E9PN89;B4DTX2;E9PLF4;E9PQQ4;E9PQK7;E9PK54;E9PI65	V9HW22	HEL-S-72p;HSPA8	Heat shock cognate 71 kDa protein
0	1	8	943.516	0.0048879	112.41	210650000	5	VCNPIITK	V9HW22;P11142;E9PKE3;Q53GZ6;Q96IS6;B3KTV0;E9PNE6;B4E1Q1;A8K7Q2;E9PS65;Q96BE0;Q96H53;Q9NZ87;Q9NWW3	V9HW22	HEL-S-72p;HSPA8	Heat shock cognate 71 kDa protein
0	1	15	1650.86	4.1277e-40	265.64	77168000	6	AAQAPSSFQLLYDLK	A0A024R652;P11586;F5H2F4;B7Z809	A0A024R652	MTHFD1	C-1-tetrahydrofolate synthase, cytoplasmic;Methylenetetrahydrofolate dehydrogenase;Methenyltetrahydrofolate cyclohydrolase;Formyltetrahydrofolate synthetase;C-1-tetrahydrofolate synthase, cytoplasmic, N-terminally processed
0	1	9	911.508	0.029611	72.325	22944000	1	APAEILNGK	A0A024R652;P11586	A0A024R652	MTHFD1	C-1-tetrahydrofolate synthase, cytoplasmic;Methylenetetrahydrofolate dehydrogenase;Methenyltetrahydrofolate cyclohydrolase;Formyltetrahydrofolate synthetase;C-1-tetrahydrofolate synthase, cytoplasmic, N-terminally processed
0	1	28	2805.41	0.02243	43.073	1061400	1	ASFITPVPGGVGPMTVAMLMQSTVESAK	A0A024R652;P11586;F5H2F4;B7Z809	A0A024R652	MTHFD1	C-1-tetrahydrofolate synthase, cytoplasmic;Methylenetetrahydrofolate dehydrogenase;Methenyltetrahydrofolate cyclohydrolase;Formyltetrahydrofolate synthetase;C-1-tetrahydrofolate synthase, cytoplasmic, N-terminally processed
0	1	12	1447.76	1.4129e-18	210.93	24980000	1	AYIQENLELVEK	A0A024R652;P11586;F5H2F4;B7Z809	A0A024R652	MTHFD1	C-1-tetrahydrofolate synthase, cytoplasmic;Methylenetetrahydrofolate dehydrogenase;Methenyltetrahydrofolate cyclohydrolase;Formyltetrahydrofolate synthetase;C-1-tetrahydrofolate synthase, cytoplasmic, N-terminally processed
0	1	10	1179.58	0.0067142	94.363	1777500	1	DDSNLYINVK	A0A024R652;P11586;F5H2F4;B7Z809	A0A024R652	MTHFD1	C-1-tetrahydrofolate synthase, cytoplasmic;Methylenetetrahydrofolate dehydrogenase;Methenyltetrahydrofolate cyclohydrolase;Formyltetrahydrofolate synthetase;C-1-tetrahydrofolate synthase, cytoplasmic, N-terminally processed
1	0	12	1216.6	1.7693e-07	155.88	17340000	1	DVDGLTSINAGR	A0A024R652;P11586	A0A024R652	MTHFD1	C-1-tetrahydrofolate synthase, cytoplasmic;Methylenetetrahydrofolate dehydrogenase;Methenyltetrahydrofolate cyclohydrolase;Formyltetrahydrofolate synthetase;C-1-tetrahydrofolate synthase, cytoplasmic, N-terminally processed
0	1	16	1807.91	1.0645e-32	250.46	10770000	1	EIGLLSEEVELYGETK	A0A024R652;P11586;F5H2F4;B7Z809	A0A024R652	MTHFD1	C-1-tetrahydrofolate synthase, cytoplasmic;Methylenetetrahydrofolate dehydrogenase;Methenyltetrahydrofolate cyclohydrolase;Formyltetrahydrofolate synthetase;C-1-tetrahydrofolate synthase, cytoplasmic, N-terminally processed
1	0	9	1029.52	0.035941	68.847	3261300	1	EQVPGFTPR	A0A024R652;P11586;F5H2F4;B7Z809	A0A024R652	MTHFD1	C-1-tetrahydrofolate synthase, cytoplasmic;Methylenetetrahydrofolate dehydrogenase;Methenyltetrahydrofolate cyclohydrolase;Formyltetrahydrofolate synthetase;C-1-tetrahydrofolate synthase, cytoplasmic, N-terminally processed
1	0	7	877.466	0.0036832	133.6	71266000	3	FSDIQIR	A0A024R652;P11586;F5H2F4;B7Z809	A0A024R652	MTHFD1	C-1-tetrahydrofolate synthase, cytoplasmic;Methylenetetrahydrofolate dehydrogenase;Methenyltetrahydrofolate cyclohydrolase;Formyltetrahydrofolate synthetase;C-1-tetrahydrofolate synthase, cytoplasmic, N-terminally processed
1	0	11	1096.64	4.4887e-09	174.86	151260000	3	GALALAQAVQR	A0A024R652;P11586;F5H2F4;B7Z809	A0A024R652	MTHFD1	C-1-tetrahydrofolate synthase, cytoplasmic;Methylenetetrahydrofolate dehydrogenase;Methenyltetrahydrofolate cyclohydrolase;Formyltetrahydrofolate synthetase;C-1-tetrahydrofolate synthase, cytoplasmic, N-terminally processed
0	1	7	831.452	0.0016611	145.04	35621000	1	GCLELIK	A0A024R652;P11586;F5H2F4;B7Z809	A0A024R652	MTHFD1	C-1-tetrahydrofolate synthase, cytoplasmic;Methylenetetrahydrofolate dehydrogenase;Methenyltetrahydrofolate cyclohydrolase;Formyltetrahydrofolate synthetase;C-1-tetrahydrofolate synthase, cytoplasmic, N-terminally processed
0	1	15	1555.83	0.027687	71.316	691380	1	GDILVVATGQPEMVK	A0A024R652;P11586;F5H2F4	A0A024R652	MTHFD1	C-1-tetrahydrofolate synthase, cytoplasmic;Methylenetetrahydrofolate dehydrogenase;Methenyltetrahydrofolate cyclohydrolase;Formyltetrahydrofolate synthetase;C-1-tetrahydrofolate synthase, cytoplasmic, N-terminally processed
0	1	13	1535.67	0.0004615	115.09	6793600	1	GDLNDCFIPCTPK	A0A024R652;P11586;F5H2F4;B7Z809	A0A024R652	MTHFD1	C-1-tetrahydrofolate synthase, cytoplasmic;Methylenetetrahydrofolate dehydrogenase;Methenyltetrahydrofolate cyclohydrolase;Formyltetrahydrofolate synthetase;C-1-tetrahydrofolate synthase, cytoplasmic, N-terminally processed
1	0	11	1168.7	7.1554e-05	133.89	45115000	2	GVPTGFILPIR	A0A024R652;P11586;F5H2F4;B7Z809;V9GYY3	A0A024R652	MTHFD1	C-1-tetrahydrofolate synthase, cytoplasmic;Methylenetetrahydrofolate dehydrogenase;Methenyltetrahydrofolate cyclohydrolase;Formyltetrahydrofolate synthetase;C-1-tetrahydrofolate synthase, cytoplasmic, N-terminally processed
0	1	10	1230.62	4.2881e-08	172.21	55665000	5	IFHELTQTDK	A0A024R652;P11586;F5H2F4;B7Z809	A0A024R652	MTHFD1	C-1-tetrahydrofolate synthase, cytoplasmic;Methylenetetrahydrofolate dehydrogenase;Methenyltetrahydrofolate cyclohydrolase;Formyltetrahydrofolate synthetase;C-1-tetrahydrofolate synthase, cytoplasmic, N-terminally processed
0	1	10	1056.58	0.032409	69.721	4187000	2	ITIGQAPTEK	A0A024R652;P11586;F5H2F4;B7Z809	A0A024R652	MTHFD1	C-1-tetrahydrofolate synthase, cytoplasmic;Methylenetetrahydrofolate dehydrogenase;Methenyltetrahydrofolate cyclohydrolase;Formyltetrahydrofolate synthetase;C-1-tetrahydrofolate synthase, cytoplasmic, N-terminally processed
0	1	23	2577.28	0.0033501	62.648	21407000	1	IVGAPMHDLLLWNNATVTTCHSK	A0A024R652;P11586;F5H2F4;B7Z809	A0A024R652	MTHFD1	C-1-tetrahydrofolate synthase, cytoplasmic;Methylenetetrahydrofolate dehydrogenase;Methenyltetrahydrofolate cyclohydrolase;Formyltetrahydrofolate synthetase;C-1-tetrahydrofolate synthase, cytoplasmic, N-terminally processed
0	1	16	1810.91	0.0025866	92.039	54013000	4	IYGADDIELLPEAQHK	A0A024R652;P11586;F5H2F4;B7Z809;V9GYY3	A0A024R652	MTHFD1	C-1-tetrahydrofolate synthase, cytoplasmic;Methylenetetrahydrofolate dehydrogenase;Methenyltetrahydrofolate cyclohydrolase;Formyltetrahydrofolate synthetase;C-1-tetrahydrofolate synthase, cytoplasmic, N-terminally processed
0	2	21	2100.11	0.00043855	92.563	19589000	1	KGEPVSAEDLGVSGALTVLMK	A0A024R652;P11586;F5H2F4;B7Z809	A0A024R652	MTHFD1	C-1-tetrahydrofolate synthase, cytoplasmic;Methylenetetrahydrofolate dehydrogenase;Methenyltetrahydrofolate cyclohydrolase;Formyltetrahydrofolate synthetase;C-1-tetrahydrofolate synthase, cytoplasmic, N-terminally processed
1	0	9	982.592	2.2057e-07	170.3	64982000	4	LAILQVGNR	A0A024R652;P11586;F5H2F4;B7Z809	A0A024R652	MTHFD1	C-1-tetrahydrofolate synthase, cytoplasmic;Methylenetetrahydrofolate dehydrogenase;Methenyltetrahydrofolate cyclohydrolase;Formyltetrahydrofolate synthetase;C-1-tetrahydrofolate synthase, cytoplasmic, N-terminally processed
1	0	12	1485.75	1.2288e-14	200.93	22072000	3	LDIDPETITWQR	A0A024R652;P11586;F5H2F4;B7Z809	A0A024R652	MTHFD1	C-1-tetrahydrofolate synthase, cytoplasmic;Methylenetetrahydrofolate dehydrogenase;Methenyltetrahydrofolate cyclohydrolase;Formyltetrahydrofolate synthetase;C-1-tetrahydrofolate synthase, cytoplasmic, N-terminally processed
0	1	14	1490.83	1.1169e-05	142.08	41829000	4	MFGIPVVVAVNAFK	A0A024R652;P11586;F5H2F4;B7Z809	A0A024R652	MTHFD1	C-1-tetrahydrofolate synthase, cytoplasmic;Methylenetetrahydrofolate dehydrogenase;Methenyltetrahydrofolate cyclohydrolase;Formyltetrahydrofolate synthetase;C-1-tetrahydrofolate synthase, cytoplasmic, N-terminally processed
0	1	12	1334.65	0.00025252	126.03	53335000	2	QGFGNLPICMAK	A0A024R652;P11586;F5H2F4;B7Z809;V9GYY3	A0A024R652	MTHFD1	C-1-tetrahydrofolate synthase, cytoplasmic;Methylenetetrahydrofolate dehydrogenase;Methenyltetrahydrofolate cyclohydrolase;Formyltetrahydrofolate synthetase;C-1-tetrahydrofolate synthase, cytoplasmic, N-terminally processed
1	0	13	1503.71	2.3678e-06	147.52	22182000	3	TDPTTLTDEEINR	A0A024R652;P11586;F5H2F4;B7Z809	A0A024R652	MTHFD1	C-1-tetrahydrofolate synthase, cytoplasmic;Methylenetetrahydrofolate dehydrogenase;Methenyltetrahydrofolate cyclohydrolase;Formyltetrahydrofolate synthetase;C-1-tetrahydrofolate synthase, cytoplasmic, N-terminally processed
1	0	12	1377.66	1.7837e-18	208.27	44576000	4	TDTESELDLISR	A0A024R652;P11586;F5H2F4;B7Z809	A0A024R652	MTHFD1	C-1-tetrahydrofolate synthase, cytoplasmic;Methylenetetrahydrofolate dehydrogenase;Methenyltetrahydrofolate cyclohydrolase;Formyltetrahydrofolate synthetase;C-1-tetrahydrofolate synthase, cytoplasmic, N-terminally processed
0	1	12	1389.7	0.00021166	117.95	5595600	1	THLSLSHNPEQK	A0A024R652;P11586;F5H2F4;B7Z809;V9GYY3	A0A024R652	MTHFD1	C-1-tetrahydrofolate synthase, cytoplasmic;Methylenetetrahydrofolate dehydrogenase;Methenyltetrahydrofolate cyclohydrolase;Formyltetrahydrofolate synthetase;C-1-tetrahydrofolate synthase, cytoplasmic, N-terminally processed
1	0	11	1198.62	0.027115	72.531	14413000	1	TPVPSDIDISR	A0A024R652;P11586;F5H2F4;B7Z809	A0A024R652	MTHFD1	C-1-tetrahydrofolate synthase, cytoplasmic;Methylenetetrahydrofolate dehydrogenase;Methenyltetrahydrofolate cyclohydrolase;Formyltetrahydrofolate synthetase;C-1-tetrahydrofolate synthase, cytoplasmic, N-terminally processed
1	0	8	899.544	0.01077	96.034	80441000	4	VLLSALER	A0A024R652;P11586;F5H2F4;B7Z809	A0A024R652	MTHFD1	C-1-tetrahydrofolate synthase, cytoplasmic;Methylenetetrahydrofolate dehydrogenase;Methenyltetrahydrofolate cyclohydrolase;Formyltetrahydrofolate synthetase;C-1-tetrahydrofolate synthase, cytoplasmic, N-terminally processed
0	1	11	1164.57	0.0083002	90.697	10493000	2	VVGDVAYDEAK	A0A024R652;P11586;F5H2F4;B7Z809	A0A024R652	MTHFD1	C-1-tetrahydrofolate synthase, cytoplasmic;Methylenetetrahydrofolate dehydrogenase;Methenyltetrahydrofolate cyclohydrolase;Formyltetrahydrofolate synthetase;C-1-tetrahydrofolate synthase, cytoplasmic, N-terminally processed
0	1	11	1435.73	5.8184e-17	215.93	22846000	3	WMIQYNNLNLK	A0A024R652;P11586;F5H2F4;B7Z809	A0A024R652	MTHFD1	C-1-tetrahydrofolate synthase, cytoplasmic;Methylenetetrahydrofolate dehydrogenase;Methenyltetrahydrofolate cyclohydrolase;Formyltetrahydrofolate synthetase;C-1-tetrahydrofolate synthase, cytoplasmic, N-terminally processed
1	0	16	1768.97	2.4411e-07	150.12	37204000	3	YSGLCPHVVVLVATVR	A0A024R652;P11586;F5H2F4;B7Z809	A0A024R652	MTHFD1	C-1-tetrahydrofolate synthase, cytoplasmic;Methylenetetrahydrofolate dehydrogenase;Methenyltetrahydrofolate cyclohydrolase;Formyltetrahydrofolate synthetase;C-1-tetrahydrofolate synthase, cytoplasmic, N-terminally processed
0	1	16	1629.9	5.8608e-20	217.01	73794000	4	YVVVTGITPTPLGEGK	A0A024R652;P11586;F5H2F4;B7Z809	A0A024R652	MTHFD1	C-1-tetrahydrofolate synthase, cytoplasmic;Methylenetetrahydrofolate dehydrogenase;Methenyltetrahydrofolate cyclohydrolase;Formyltetrahydrofolate synthetase;C-1-tetrahydrofolate synthase, cytoplasmic, N-terminally processed
0	1	8	984.492	0.012985	93.143	4937800	1	DVAYQYVK	Q567R6;A4D1U3;Q04837;A0A0G2JLD8;E7EUY5;B7Z268;C9K0U8	Q567R6	SSBP1	Single-stranded DNA-binding protein;Single-stranded DNA-binding protein, mitochondrial
0	1	9	1132.47	0.025592	74.533	12834000	1	IDYGEYMDK	Q567R6;A4D1U3;Q04837;A0A0G2JLD8;E7EUY5;B7Z268	Q567R6	SSBP1	Single-stranded DNA-binding protein;Single-stranded DNA-binding protein, mitochondrial
2	0	9	1043.62	0.040433	67.494	88426000	1	ISVFRPGLR	Q567R6;A4D1U3;Q04837;A0A0G2JLD8;E7EUY5;B7Z268;C9K0U8	Q567R6	SSBP1	Single-stranded DNA-binding protein;Single-stranded DNA-binding protein, mitochondrial
1	0	15	1777.88	8.8858e-49	281.99	36053000	5	NPVTIFSLATNEMWR	Q567R6;A4D1U3;Q04837;A0A0G2JLD8;E7EUY5;B7Z268;C9K0U8	Q567R6	SSBP1	Single-stranded DNA-binding protein;Single-stranded DNA-binding protein, mitochondrial
0	1	18	1991.06	3.0576e-33	246.42	37607000	2	QATTIIADNIIFLSDQTK	Q567R6;A4D1U3;Q04837	Q567R6	SSBP1	Single-stranded DNA-binding protein;Single-stranded DNA-binding protein, mitochondrial
0	1	15	1610.74	2.5837e-58	294.97	37123000	4	SGDSEVYQLGDVSQK	Q567R6;A4D1U3;Q04837;A0A0G2JLD8;E7EUY5;B7Z268;C9K0U8	Q567R6	SSBP1	Single-stranded DNA-binding protein;Single-stranded DNA-binding protein, mitochondrial
1	0	8	882.492	0.0030697	120.87	83451000	5	VGQDPVLR	Q567R6;A4D1U3;Q04837;A0A0G2JLD8;E7EUY5;B7Z268;C9K0U8	Q567R6	SSBP1	Single-stranded DNA-binding protein;Single-stranded DNA-binding protein, mitochondrial
	2	1	16	1920.93	0.006728	99.991	0	0	AICENKNGNPHRENLR	W0UV28;P03950	W0UV28	RAA1;ANG	Angiogenin
	2	0	10	1343.56	2.3111e-07	172.21	2213900000	17	DDRYCESIMR	W0UV28;P03950	W0UV28	RAA1;ANG	Angiogenin
	0	1	10	1157.58	3.6846e-06	160.77	6807800000	13	DINTFIHGNK	W0UV28;P03950	W0UV28	RAA1;ANG	Angiogenin
	1	1	11	1313.68	1.0042e-27	248.98	6251800000	18	DINTFIHGNKR	W0UV28;P03950	W0UV28	RAA1;ANG	Angiogenin
	0	2	17	1900.95	0.014238	76.574	6332100	1	GLTSPCKDINTFIHGNK	W0UV28;P03950	W0UV28	RAA1;ANG	Angiogenin
	1	0	13	1553.72	4.876e-33	255.41	1329100000	24	LHGGSPWPPCQYR	W0UV28;P03950	W0UV28	RAA1;ANG	Angiogenin
	1	0	20	2266.15	2.1933e-83	332.29	5258400000	13	NVVVACENGLPVHLDQSIFR	W0UV28;P03950	W0UV28	RAA1;ANG	Angiogenin
	2	0	22	2519.31	0.022206	61.096	2715300	1	NVVVACENGLPVHLDQSIFRRP	W0UV28;P03950	W0UV28	RAA1;ANG	Angiogenin
	0	1	9	1056.49	1.6133e-05	157.75	731260000	6	SSFQVTTCK	W0UV28;P03950	W0UV28	RAA1;ANG	Angiogenin
	1	0	7	957.405	0.0046166	133.81	2236500000	11	YCESIMR	W0UV28;P03950	W0UV28	RAA1;ANG	Angiogenin
	0	1	12	1522.72	1.7711e-30	248.19	2112800000	18	YTHFLTQHYDAK	W0UV28;P03950	W0UV28	RAA1;ANG	Angiogenin
	1	1	16	1960.95	7.9141e-40	268.18	18755000000	60	YTHFLTQHYDAKPQGR	W0UV28;P03950	W0UV28	RAA1;ANG	Angiogenin
	2	1	19	2347.11	0.0095817	61.186	1154600	1	YTHFLTQHYDAKPQGRDDR	W0UV28;P03950	W0UV28	RAA1;ANG	Angiogenin
